# Supplementary material
Source: PubMed Central journal article supplement (PMC8018518)
Supplement: NIHMS1684493-supplement-1.pdf [file NIHMS1684493-supplement-1.pdf]

## Supplementary Methods

### Search Strategy for PICO Questions 1, 2, and 7

Initial search date: July 23, 2018

Databases searched: Ovid MEDLINE: Epub Ahead of Print, In-Process & Other Non-Indexed Citations, Ovid MEDLINE Daily and Ovid MEDLINE 1946-Present, Embase Classic+Embase 1947 to 2018 July 20: Wiley Cochrane Ovid MEDLINE, Embase

| #  | Searches                                                                                                                                                                                                      | Results   |
|----|---------------------------------------------------------------------------------------------------------------------------------------------------------------------------------------------------------------|-----------|
| 1  | exp *Anti-Bacterial Agents/ use ppez                                                                                                                                                                          | 416,789   |
| 2  | exp Anti-Bacterial Agents/ae [Adverse Effects]                                                                                                                                                                | 241,469   |
| 3  | exp *antibiotic agent/ use emczd                                                                                                                                                                              | 533,685   |
| 4  | exp antibiotic agent/ae [Adverse Drug Reaction]                                                                                                                                                               | 86,043    |
| 5  | (anti-bacteria* or antibacteria* or anti-biotic* or antibiotic*).ti.                                                                                                                                          | 262,253   |
| 6  | *gastroenteritis/ use ppez or *dysentery/ use ppez or *enteritis/ use ppez or *enterocolitis/ use ppez or *gastritis/ use ppez                                                                                | 33,109    |
| 7  | *enterocolitis/ use emczd or *dysentery/ use emczd or *enteritis/ use emczd or exp acute gastroenteritis/ use emczd or exp viral gastroenteritis/ use emczd or *gastritis/ use emczd                          | 50,443    |
| 8  | ((acute or infectious) adj2 gastroenteritis).ti,ab.                                                                                                                                                           | 10,996    |
| 9  | exp *DIARRHEA/                                                                                                                                                                                                | 74,022    |
| 10 | exp antibiotic associated diarrhea/ use emczd                                                                                                                                                                 | 553       |
| 11 | (Diarrhoea or diarrhea).ti.                                                                                                                                                                                   | 50,932    |
| 12 | exp *Clostridium difficile/ use ppez                                                                                                                                                                          | 6553      |
| 13 | exp *Clostridium difficile infection/ use emczd                                                                                                                                                               | 5976      |
| 14 | (C difficile or C diff or Clostridium difficile).ti,ab.                                                                                                                                                       | 31,883    |
| 15 | or/1-14                                                                                                                                                                                                       | 1,376,768 |
| 16 | exp *Synbiotics/ use ppez                                                                                                                                                                                     | 284       |
| 17 | exp *synbiotic agent/ use emczd                                                                                                                                                                               | 620       |
| 18 | exp *PROBIOTICS/ use ppez                                                                                                                                                                                     | 10,392    |
| 19 | exp *probiotic agent/ use emczd                                                                                                                                                                               | 15,101    |
| 20 | (probiotic* or synbiotic*).ti,ab.                                                                                                                                                                             | 42,845    |
| 21 | (beneficial adj2 (microb* or bacter*)).ti,ab.                                                                                                                                                                 | 3663      |
| 22 | or/16-21                                                                                                                                                                                                      | 49,206    |
| 23 | 15 and 22                                                                                                                                                                                                     | 6347      |
| 24 | animals/ not (humans/ and animals/)                                                                                                                                                                           | 5,798,837 |
| 25 | 23 not 24                                                                                                                                                                                                     | 5902      |
| 26 | limit 25 to english language                                                                                                                                                                                  | 5243      |
| 27 | limit 26 to dd=20070101-20180630 [Limit not valid in Ovid MEDLINE,Ovid MEDLINE Daily Update,Ovid MEDLINE In-Process,Ovid MEDLINE Publisher; records were retained]                                            | 3914      |
| 28 | limit 26 to ed=20070101-20180630 [Limit not valid in Embase; records were retained]                                                                                                                           | 4718      |
| 29 | 27 or 28                                                                                                                                                                                                      | 5243      |
| 30 | limit 29 to (case reports or comment or editorial or letter or note) [Limit not valid in Ovid MEDLINE,Ovid MEDLINE Daily Update,Ovid MEDLINE In-Process,Ovid MEDLINE Publisher,Embase; records were retained] | 416       |
| 31 | Case Report/                                                                                                                                                                                                  | 42,46,270 |
| 32 | 29 not (30 or 31)                                                                                                                                                                                             | 4761      |
| 33 | remove duplicates from 32                                                                                                                                                                                     | 3510      |

Wiley Cochrane

| ID | Search                                                              | Hits  |
|----|---------------------------------------------------------------------|-------|
| #1 | MeSH descriptor: [Anti-Bacterial Agents] explode all trees          | 12105 |
| #2 | (anti-bacteria* or antibacteria* or anti-biotic* or antibiotic*).ti | 7706  |
| #3 | MeSH descriptor: [Gastroenteritis] this term only                   | 484   |
| #4 | MeSH descriptor: [Dysentery] explode all trees                      | 237   |
| #5 | MeSH descriptor: [Enteritis] explode all trees                      | 224   |

.Continued

| ID  | Search                                                                  | Hits  |
|-----|-------------------------------------------------------------------------|-------|
| #6  | MeSH descriptor: [Enterocolitis] explode all trees                      | 398   |
| #7  | MeSH descriptor: [Gastritis] explode all trees                          | 659   |
| #8  | ((acute or infectious) near/2 gastroenteritis):ti,ab                    | 306   |
| #9  | MeSH descriptor: [Diarrhea] explode all trees                           | 3285  |
| #10 | (Diarrhoea or diarrhea):ti                                              | 2717  |
| #11 | MeSH descriptor: [Clostridium difficile] explode all trees              | 222   |
| #12 | (C difficile or C diff or Clostridium difficile):ti,ab                  | 1013  |
| #13 | #1 or #2 or #3 or #4 or #5 or #6 or #7 or #8 or #9 or #10 or #11 or #12 | 23268 |
| #14 | MeSH descriptor: [Synbiotics] explode all trees                         | 107   |
| #15 | MeSH descriptor: [Probiotics] explode all trees                         | 1833  |
| #16 | (probiotic* or synbiotic*):ti,ab                                        | 4030  |
| #17 | (beneficial near/2 (microb* or bacter*)):ti,ab                          | 113   |
| #18 | #14 or #15 or #16 or #17                                                | 4401  |
| #19 | #13 and #18 Publication Year from 2007 to 2018                          | 618   |

MeSH, medical subject headings.

### Search Strategy for PICO Questions 3, 4, and 5

Initial search date: August 19, 2018

Databases searched: Ovid MEDLINE: Epub Ahead of Print, In-Process & Other Non-Indexed Citations, Ovid MEDLINE Daily and Ovid MEDLINE 1946-Present, Embase Classic+Embase 1947 to 2018 August 17; Wiley Cochrane Ovid MEDLINE, Embase

| #  | Searches                                                                                                                                                                                                          | Results   |
|----|-------------------------------------------------------------------------------------------------------------------------------------------------------------------------------------------------------------------|-----------|
| 1  | exp Inflammatory Bowel Diseases/ use ppez                                                                                                                                                                         | 73,366    |
| 2  | exp inflammatory bowel disease/ use emczd                                                                                                                                                                         | 129,234   |
| 3  | exp POUCHITIS/ use ppez                                                                                                                                                                                           | 757       |
| 4  | exp ileitis/ use emczd                                                                                                                                                                                            | 5783      |
| 5  | (ileitis or pouchitis).ti,ab.                                                                                                                                                                                     | 8498      |
| 6  | inflammatory bowel.ti,ab.                                                                                                                                                                                         | 103,035   |
| 7  | crohn*.ti,ab.                                                                                                                                                                                                     | 110,375   |
| 8  | ((regional or terminal or granulomatous or ulcerative) adj2 (enteritis or colitis)).ti,ab.                                                                                                                        | 91,883    |
| 9  | or/1-8                                                                                                                                                                                                            | 259,374   |
| 10 | exp *Synbiotics/ use ppez                                                                                                                                                                                         | 287       |
| 11 | exp *synbiotic agent/ use emczd                                                                                                                                                                                   | 565       |
| 12 | exp *PROBIOTICS/ use ppez                                                                                                                                                                                         | 10,506    |
| 13 | exp *probiotic agent/ use emczd                                                                                                                                                                                   | 14,051    |
| 14 | (probiotic* or synbiotic*).ti,ab.                                                                                                                                                                                 | 41,330    |
| 15 | (beneficial adj2 (microb* or bacter*)).ti,ab.                                                                                                                                                                     | 3525      |
| 16 | or/10-15                                                                                                                                                                                                          | 47,481    |
| 17 | 9 and 16                                                                                                                                                                                                          | 4023      |
| 18 | animals/ not (humans/ and animals/)                                                                                                                                                                               | 5,772,961 |
| 19 | 17 not 18                                                                                                                                                                                                         | 3778      |
| 20 | limit 19 to english language                                                                                                                                                                                      | 3449      |
| 21 | limit 20 to dd=20050101-20180630 [Limit not valid in Ovid MEDLINE,Ovid MEDLINE Daily Update,Ovid MEDLINE In-Process,Ovid MEDLINE Publisher; records were retained]                                                | 2611      |
| 22 | limit 20 to ed=20050101-20180630 [Limit not valid in Embase; records were retained]                                                                                                                               | 3166      |
| 23 | 21 or 22                                                                                                                                                                                                          | 3449      |
| 24 | limit 23 to (case reports or comment or editorial or letter or note) [Limit not valid in Ovid MEDLINE, Ovid MEDLINE Daily Update, Ovid MEDLINE In-Process, Ovid MEDLINE Publisher, Embase; records were retained] | 199       |
| 25 | Case Report/                                                                                                                                                                                                      | 4,169,545 |
| 26 | 23 not (24 or 25)                                                                                                                                                                                                 | 3215      |
| 27 | remove duplicates from 26                                                                                                                                                                                         | 2251      |

Wiley Cochrane

| ID  | Search                                                                                       | Hits |
|-----|----------------------------------------------------------------------------------------------|------|
| #1  | MeSH descriptor: [Inflammatory Bowel Diseases] explode all trees                             | 2743 |
| #2  | MeSH descriptor: [Pouchitis] explode all trees                                               | 35   |
| #3  | (ileitis or pouchitis):ti,ab                                                                 | 128  |
| #4  | inflammatory bowel:ti,ab                                                                     | 2546 |
| #5  | crohn*:ti,ab                                                                                 | 3156 |
| #6  | ((regional or terminal or granulomatous or ulcerative) near/2 (enteritis or colitis)):ti,ab. | 1277 |
| #7  | #1 or #2 or #3 or #4 or #5 or #6                                                             | 7138 |
| #8  | MeSH descriptor: [Synbiotics] explode all trees                                              | 100  |
| #9  | MeSH descriptor: [Probiotics] explode all trees                                              | 1656 |
| #10 | (probiotic* or synbiotic*):ti,ab                                                             | 3984 |
| #11 | (beneficial near/2 (microb* or bacter*)):ti,ab                                               | 131  |
| #12 | #8 or #9 or #10 or #11                                                                       | 4335 |
| #13 | #7 and #12 with Cochrane Library publication date between<br>Jan 2005 and Jul 2018           | 209  |

MeSH, medical subject headings.

### Search Strategy for PICO Question 6

Search date: February 15, 2019

Databases searched: Ovid MEDLINE: Epub Ahead of Print, In-Process & Other Non-Indexed Citations, Ovid MEDLINE Daily and Ovid MEDLINE 1946-Present, Embase Classic+Embase 1947 to 2019 February 14; Wiley Cochrane Ovid MEDLINE, Embase

| #  | Searches                                                                                                                                                                                                      | Results   |
|----|---------------------------------------------------------------------------------------------------------------------------------------------------------------------------------------------------------------|-----------|
| 1  | *colonic diseases, functional/ use ppez or exp irritable bowel syndrome/ use ppez                                                                                                                             | 9312      |
| 2  | exp irritable colon/ use emczd                                                                                                                                                                                | 24,528    |
| 3  | ((irritable or spastic or functional) adj3 (bowel or colon)).ti,ab.                                                                                                                                           | 35,206    |
| 4  | ibs.ti,ab.                                                                                                                                                                                                    | 22,278    |
| 5  | or/1-4                                                                                                                                                                                                        | 47,381    |
| 6  | exp *Synbiotics/ use ppez                                                                                                                                                                                     | 328       |
| 7  | exp *synbiotic agent/ use emczd                                                                                                                                                                               | 692       |
| 8  | exp *PROBIOTICS/ use ppez                                                                                                                                                                                     | 11,120    |
| 9  | exp *probiotic agent/ use emczd                                                                                                                                                                               | 16,180    |
| 10 | (probiotic* or synbiotic*).ti,ab.                                                                                                                                                                             | 46,454    |
| 11 | (beneficial adj2 (microb* or bacter*)).ti,ab.                                                                                                                                                                 | 4160      |
| 12 | or/6-11                                                                                                                                                                                                       | 53,387    |
| 13 | 5 and 12                                                                                                                                                                                                      | 2403      |
| 14 | animals/ not (humans/ and animals/)                                                                                                                                                                           | 5,856,175 |
| 15 | 13 not 14                                                                                                                                                                                                     | 2373      |
| 16 | limit 15 to english language                                                                                                                                                                                  | 2128      |
| 17 | limit 16 to yr="1860 - 2018"                                                                                                                                                                                  | 2099      |
| 18 | limit 17 to (case reports or comment or editorial or letter or note) [Limit not valid in Ovid MEDLINE,Ovid MEDLINE Daily Update,Ovid MEDLINE In-Process,Ovid MEDLINE Publisher,Embase; records were retained] | 132       |
| 19 | Case Report/                                                                                                                                                                                                  | 4,351,195 |
| 20 | 17 not (18 or 19)                                                                                                                                                                                             | 1953      |
| 21 | remove duplicates from 20                                                                                                                                                                                     | 1354      |

Wiley Cochrane

| ID  | Search                                                               | Hits |
|-----|----------------------------------------------------------------------|------|
| #1  | MeSH descriptor: [Colonic Diseases, Functional] this term only       | 297  |
| #2  | MeSH descriptor: [Irritable Bowel Syndrome] explode all trees        | 946  |
| #3  | ((irritable or spastic or functional) near/3 (bowel or colon)):ti,ab | 2575 |
| #4  | ibs:ti,ab                                                            | 1715 |
| #5  | #1 or #2 or #3 or #4                                                 | 2984 |
| #6  | MeSH descriptor: [Synbiotics] explode all trees                      | 104  |
| #7  | MeSH descriptor: [Probiotics] explode all trees                      | 1709 |
| #8  | (probiotic* or synbiotic*):ti,ab                                     | 3964 |
| #9  | (beneficial near/2 (microb* or bacter*)):ti,ab                       | 123  |
| #10 | #6 or #7 or #8 or #9                                                 | 4327 |
| #11 | #5 and #10                                                           | 263  |

MeSH, medical subject headings.
