# Supplementary material
Source: PubMed Central journal article supplement (PMC8018518)
Supplement: NIHMS1684493-supplement-Appendices.pdf [file NIHMS1684493-supplement-Appendices.pdf]

# Appendices for American Gastroenterological Association Institute Technical Review on the Role of Probiotics in the Management of Gastrointestinal Disorders

Geoffrey A. Preidis,<sup>1</sup> Adam V. Weizman,<sup>2</sup> Purna C. Kashyap,<sup>3</sup> Rebecca L. Morgan<sup>4</sup>

<sup>1</sup>Section of Gastroenterology, Hepatology & Nutrition, Department of Pediatrics, Baylor College of Medicine and Texas Children’s Hospital, Houston, TX, USA; <sup>2</sup>Division of Gastroenterology, Mount Sinai Hospital Department of Medicine, University of Toronto, Toronto, Ontario, Canada; <sup>3</sup>Enteric Neuroscience Program, Division of Gastroenterology and Hepatology, Mayo Clinic, Rochester, MN, USA; <sup>4</sup>Health Research Methods, Evidence and Impact, McMaster University, Hamilton, Ontario, Canada

## Contents

|                                                                                                                                                                                                                                                                                                                                    |    |
|------------------------------------------------------------------------------------------------------------------------------------------------------------------------------------------------------------------------------------------------------------------------------------------------------------------------------------|----|
| Appendix 1: Should probiotics be used as part of the treatment of <i>Clostridioides difficile</i> infection? .....                                                                                                                                                                                                                 | 9  |
| Bibliography .....                                                                                                                                                                                                                                                                                                                 | 9  |
| <b>Question:</b> <i>Saccharomyces boulardii</i> compared to placebo/antibiotics in symptomatic patients with confirmed <i>C. difficile</i> infection (1a) .....                                                                                                                                                                    | 10 |
| <b>Question:</b> <i>Lactobacillus plantarum</i> 299v compared to placebo/antibiotics in symptomatic patients with confirmed <i>C. difficile</i> infection (1b) ..                                                                                                                                                                  | 13 |
| <b>Question:</b> <i>Lactobacillus rhamnosus</i> ATCC 53103 compared to placebo/antibiotics in symptomatic patients with confirmed <i>C. difficile</i> infection (1c) .....                                                                                                                                                         | 17 |
| <b>Question:</b> <i>Lactobacillus acidophilus</i> ATCC 700396 + <i>Lactobacillus paracasei</i> subsp. <i>paracasei</i> ATCC 335 + <i>Bifidobacterium animalis</i> subsp. <i>lactis</i> ATCC SD5220 and ATCC SD5219 compared to placebo/antibiotics in symptomatic patients with confirmed <i>C. difficile</i> infection (1d) ..... | 19 |
| Appendix 2: Should probiotics be used in the prevention of <i>Clostridioides difficile</i> -associated diarrhea? .....                                                                                                                                                                                                             | 22 |
| Bibliography .....                                                                                                                                                                                                                                                                                                                 | 22 |
| <b>Question:</b> Probiotics compared to antibiotics alone or antibiotics + placebo in patients receiving antibiotic therapy for any indication with the exception of <i>C. difficile</i> infection (2a) .....                                                                                                                      | 26 |
| Outcomes stratified by species: .....                                                                                                                                                                                                                                                                                              | 38 |
| <i>C. difficile</i> -associated diarrhea .....                                                                                                                                                                                                                                                                                     | 38 |
| Incidence of infection .....                                                                                                                                                                                                                                                                                                       | 42 |
| Adverse events .....                                                                                                                                                                                                                                                                                                               | 45 |

|                                                                                                                                                                                                                                                                                                                                                                                                                                                                                   |    |
|-----------------------------------------------------------------------------------------------------------------------------------------------------------------------------------------------------------------------------------------------------------------------------------------------------------------------------------------------------------------------------------------------------------------------------------------------------------------------------------|----|
| Incidence of antibiotic-associated diarrhea.....                                                                                                                                                                                                                                                                                                                                                                                                                                  | 49 |
| Appendix 3: Should probiotics be used in patients with Crohn’s disease? .....                                                                                                                                                                                                                                                                                                                                                                                                     | 53 |
| Bibliography .....                                                                                                                                                                                                                                                                                                                                                                                                                                                                | 53 |
| <b>Question:</b> <i>Lactobacillus rhamnosus</i> ATCC 53103 compared to placebo or standard of care or placebo + standard of care in patients with Crohn’s disease (3a).....                                                                                                                                                                                                                                                                                                       | 55 |
| <b>Question:</b> <i>Escherichia coli</i> Nissle 1917 compared to placebo in patients with Crohn’s disease (3b) .....                                                                                                                                                                                                                                                                                                                                                              | 59 |
| <b>Question:</b> <i>Lactobacillus paracasei</i> subsp. <i>paracasei</i> + <i>Lactobacillus plantarum</i> + <i>Lactobacillus acidophilus</i> + <i>Lactobacillus delbrueckii</i> subsp. <i>bulgaricus</i> + <i>Bifidobacterium longum</i> subsp. <i>longum</i> + <i>Bifidobacterium breve</i> + <i>B. longum</i> subsp. <i>infantis</i> + <i>Streptococcus salivarius</i> subsp. <i>thermophilus</i> compared to placebo +/- mesalamine in patients with Crohn’s disease (3c) ..... | 61 |
| <b>Question:</b> <i>Lactobacillus rhamnosus</i> ATCC 53103 + maintenance therapy compared to placebo + maintenance therapy in patients with Crohn’s disease (3d).....                                                                                                                                                                                                                                                                                                             | 65 |
| <b>Question:</b> <i>Lactobacillus rhamnosus</i> ATCC 53103 + mesalamine compared to mesalamine alone in patients with Crohn’s disease (3e) .....                                                                                                                                                                                                                                                                                                                                  | 67 |
| <b>Question:</b> <i>Lactobacillus rhamnosus</i> ATCC 53103 compared to mesalamine in patients with Crohn’s disease (3f) .....                                                                                                                                                                                                                                                                                                                                                     | 69 |
| <b>Question:</b> <i>Saccharomyces boulardii</i> compared to placebo +/- mesalamine alone in patients with Crohn’s disease (3g).....                                                                                                                                                                                                                                                                                                                                               | 71 |
| <b>Question:</b> <i>Lactobacillus johnsonii</i> NCC 533 compared to placebo in prevention of endoscopic recurrence after surgery for Crohn’s disease (3h) .....                                                                                                                                                                                                                                                                                                                   | 73 |
| Appendix 4: Should probiotics be used in patients with ulcerative colitis? .....                                                                                                                                                                                                                                                                                                                                                                                                  | 75 |
| Bibliography .....                                                                                                                                                                                                                                                                                                                                                                                                                                                                | 75 |
| <b>Question:</b> <i>Bifidobacterium breve</i> Yakult + <i>Bifidobacterium bifidum</i> Yakult + <i>Lactobacillus acidophilus</i> compared to placebo in patients with ulcerative colitis (4a).....                                                                                                                                                                                                                                                                                 | 77 |
| <b>Question:</b> <i>Bifidobacterium breve</i> Yakult + <i>Lactobacillus acidophilus</i> fermented milk compared to placebo in patients with ulcerative colitis (4b) .....                                                                                                                                                                                                                                                                                                         | 79 |
| <b>Question:</b> <i>Lactobacillus paracasei</i> subsp. <i>paracasei</i> + <i>Lactobacillus plantarum</i> + <i>Lactobacillus acidophilus</i> + <i>Lactobacillus delbrueckii</i> subsp. <i>bulgaricus</i> + <i>Bifidobacterium longum</i> subsp. <i>longum</i> + <i>Bifidobacterium breve</i> + <i>B. longum</i> subsp. <i>infantis</i> + <i>Streptococcus salivarius</i> subsp. <i>thermophilus</i> compared to mesalamine alone in patients with ulcerative colitis (4c).....     | 81 |
| <b>Question:</b> <i>Bifidobacterium longum</i> Reuter ATCC BAA-999 compared to placebo in patients with ulcerative colitis (4d) .....                                                                                                                                                                                                                                                                                                                                             | 85 |

|                                                                                                                                                                                                                                                                                                                                                                                                                                                                                 |     |
|---------------------------------------------------------------------------------------------------------------------------------------------------------------------------------------------------------------------------------------------------------------------------------------------------------------------------------------------------------------------------------------------------------------------------------------------------------------------------------|-----|
| <b>Question: <i>Escherichia coli</i> Nissle 1917 compared to placebo +/- mesalamine in patients with ulcerative colitis (4e)</b> .....                                                                                                                                                                                                                                                                                                                                          | 87  |
| <b>Question: <i>Lactobacillus rhamnosus</i> ATCC 53103 compared to mesalamine in patients with ulcerative colitis (4f)</b> .....                                                                                                                                                                                                                                                                                                                                                | 90  |
| <b>Question: <i>Lactobacillus reuteri</i> ATCC 55730 enema + meslamine compared to placebo + mesalamine in patients with ulcerative colitis (4g)</b> ..                                                                                                                                                                                                                                                                                                                         | 92  |
| <b>Question: <i>Lactobacillus acidophilus</i> LA-5 + <i>Bifidobacterium animalis</i> subsp. <i>lactis</i> Bb12 compared to placebo in patients with ulcerative colitis (4h)</b> .....                                                                                                                                                                                                                                                                                           | 94  |
| <b>Question: <i>Enterococcus faecalis</i> T-110 + <i>Clostridium butyricum</i> TO-A + <i>Bacillus mesentericus</i> TO-A compared to placebo in patients with ulcerative colitis (4i)</b> .....                                                                                                                                                                                                                                                                                  | 96  |
| Appendix 5: Should probiotics be used in patients with pouchitis? .....                                                                                                                                                                                                                                                                                                                                                                                                         | 98  |
| Bibliography .....                                                                                                                                                                                                                                                                                                                                                                                                                                                              | 98  |
| <b>Question: <i>Lactobacillus paracasei</i> subsp. <i>paracasei</i> + <i>Lactobacillus plantarum</i> + <i>Lactobacillus acidophilus</i> + <i>Lactobacillus delbrueckii</i> subsp. <i>bulgaricus</i> + <i>Bifidobacterium longum</i> subsp. <i>longum</i> + <i>Bifidobacterium breve</i> + <i>B. longum</i> subsp. <i>infantis</i> + <i>Streptococcus salivarius</i> subsp. <i>thermophilus</i> compared to placebo / standard of care in patients with pouchitis (5a)</b> ..... | 99  |
| <b>Question: <i>Lactobacillus rhamnosus</i> ATCC 53103 compared to placebo in patients with pouchitis (5b)</b> .....                                                                                                                                                                                                                                                                                                                                                            | 103 |
| <b>Question: <i>Clostridium butyricum</i> CBM 588 compared to placebo in patients with pouchitis (5c)</b> .....                                                                                                                                                                                                                                                                                                                                                                 | 105 |
| <b>Question: <i>Bifidobacterium longum</i> subsp. <i>longum</i> compared to placebo in patients with pouchitis (5d)</b> .....                                                                                                                                                                                                                                                                                                                                                   | 107 |
| Appendix 6: Should probiotics be used to improve global response or abdominal pain severity in symptomatic children and adults with irritable bowel syndrome? .....                                                                                                                                                                                                                                                                                                             | 109 |
| Bibliography .....                                                                                                                                                                                                                                                                                                                                                                                                                                                              | 109 |
| <b>Question: <i>Saccharomyces boulardii</i> compared to placebo for adults with IBS (6a)</b> .....                                                                                                                                                                                                                                                                                                                                                                              | 113 |
| <b>Question: <i>Lactobacillus paracasei</i> subsp. <i>paracasei</i> + <i>Lactobacillus plantarum</i> + <i>Lactobacillus acidophilus</i> + <i>Lactobacillus delbrueckii</i> subsp. <i>bulgaricus</i> + <i>Bifidobacterium longum</i> subsp. <i>longum</i> + <i>Bifidobacterium breve</i> + <i>B. longum</i> subsp. <i>infantis</i> + <i>Streptococcus salivarius</i> subsp. <i>thermophilus</i> compared to placebo for adults with IBS (6b)</b> .....                           | 116 |
| <b>Question: <i>Escherichia coli</i> Nissle 1917 compared to placebo for adults with IBS (6c)</b> .....                                                                                                                                                                                                                                                                                                                                                                         | 121 |
| <b>Question: <i>Lactobacillus paracasei</i> subsp. <i>paracasei</i> + <i>Lactobacillus plantarum</i> + <i>Lactobacillus acidophilus</i> + <i>Lactobacillus delbrueckii</i> subsp. <i>bulgaricus</i> + <i>Bifidobacterium longum</i> subsp. <i>longum</i> + <i>Bifidobacterium breve</i> + <i>B. longum</i> subsp. <i>infantis</i> + <i>Streptococcus salivarius</i> subsp. <i>thermophilus</i> compared to placebo for children with IBS (6d)</b> .....                         | 123 |

|                                                                                                                                                                                                                                                                                    |     |
|------------------------------------------------------------------------------------------------------------------------------------------------------------------------------------------------------------------------------------------------------------------------------------|-----|
| <b>Question:</b> <i>Lactobacillus plantarum</i> 299v compared to placebo for adults with IBS (6e).....                                                                                                                                                                             | 126 |
| <b>Question:</b> <i>Lactobacillus rhamnosus</i> ATCC 53103 compared to placebo for treatment if IBS in adults (6f).....                                                                                                                                                            | 130 |
| <b>Question:</b> <i>Lactobacillus rhamnosus</i> ATCC 53103 compared to placebo for children with IBS (6g) .....                                                                                                                                                                    | 132 |
| <b>Question:</b> <i>Bacillus coagulans</i> MTCC 5856 compared to placebo for treatment of IBS (6h) .....                                                                                                                                                                           | 136 |
| <b>Question:</b> <i>Lactobacillus reuteri</i> compared to placebo for adults with IBS (6i).....                                                                                                                                                                                    | 139 |
| <b>Question:</b> <i>Lactobacillus reuteri</i> DSM 17938 compared to placebo for children with IBS (6j).....                                                                                                                                                                        | 141 |
| <b>Question:</b> <i>Lactobacillus gasseri</i> BNR17 compared to placebo for treatment of IBS (6k).....                                                                                                                                                                             | 142 |
| <b>Question:</b> <i>Saccharomyces cerevisiae</i> CNCM I-3856 compared to placebo for treatment if IBS in adults (6l) .....                                                                                                                                                         | 143 |
| <b>Question:</b> <i>Lactobacillus casei</i> Shirota compared to placebo for adults with IBS (6m).....                                                                                                                                                                              | 149 |
| <b>Question:</b> <i>Lactobacillus rhamnosus</i> compared to placebo for adults with IBS (6n).....                                                                                                                                                                                  | 151 |
| <b>Question:</b> <i>Lactobacillus acidophilus</i> SDC 2012 and 2013 compared to placebo for adults with IBS (6o).....                                                                                                                                                              | 154 |
| <b>Question:</b> <i>Bifidobacterium animalis</i> subsp. <i>lactis</i> I-2494 + <i>Streptococcus salivarius</i> subsp. <i>thermophilus</i> I-1630 + <i>Lactobacillus delbrueckii</i> subsp. <i>bulgaricus</i> I-1632 and I-1519 compared to placebo for adults with IBS (6p) .....  | 156 |
| <b>Question:</b> <i>Lactobacillus paracasei</i> subsp. <i>paracasei</i> F-19 + <i>Lactobacillus acidophilus</i> LA-5 + <i>Bifidobacterium animalis</i> subsp. <i>lactis</i> Bb12 compared to placebo for adults with IBS (6q) .....                                                | 161 |
| <b>Question:</b> <i>Escherichia coli</i> DSM 17252 compared to placebo for adults with IBS (6r).....                                                                                                                                                                               | 163 |
| <b>Question:</b> <i>Streptococcus salivarius</i> subsp. <i>thermophilus</i> + <i>Lactobacillus delbrueckii</i> subsp. <i>bulgaricus</i> + <i>Lactobacillus acidophilus</i> + <i>Bifidobacterium longum</i> subsp. <i>longum</i> compared to placebo for adults with IBS (6s) ..... | 165 |
| <b>Question:</b> <i>Bifidobacterium longum</i> subsp. <i>longum</i> LA-101 + <i>Lactobacillus acidophilus</i> LA-102 + <i>Lactococcus lactis</i> LA-103 + <i>Streptococcus salivarius</i> subsp. <i>thermophilus</i> LA-104 compared to placebo for adults with IBS (6t) .....     | 168 |
| <b>Question:</b> <i>Bifidobacterium longum</i> subsp. <i>longum</i> NCC 3001 compared to placebo for adults with IBS (6u) .....                                                                                                                                                    | 171 |
| <b>Question:</b> <i>Lactobacillus rhamnosus</i> NCIMB 30174 + <i>Lactobacillus plantarum</i> NCIMB 30173 + <i>Lactobacillus acidophilus</i> NCIMB 30175 + <i>Enterococcus faecium</i> NCIMB 30176 compared to placebo for adults with IBS (6v) .....                               | 175 |
| <b>Question:</b> <i>Lactobacillus acidophilus</i> NCIMB 30157 and NCIMB 30156 + <i>Bifidobacterium bifidum</i> NCIMB 30153 + <i>Bifidobacterium animalis</i> subsp. <i>lactis</i> NCIMB 30172 compared to placebo for adults with IBS (6w).....                                    | 180 |

|                                                                                                                                                                                                                                                                                                                                                                                                                                                                                                                                                                                                                                                                                                                         |     |
|-------------------------------------------------------------------------------------------------------------------------------------------------------------------------------------------------------------------------------------------------------------------------------------------------------------------------------------------------------------------------------------------------------------------------------------------------------------------------------------------------------------------------------------------------------------------------------------------------------------------------------------------------------------------------------------------------------------------------|-----|
| <b>Question:</b> <i>Lactobacillus acidophilus</i> KCTC 11906BP + <i>Lactobacillus plantarum</i> KCTC 11867BP + <i>Lactobacillus rhamnosus</i> KCTC 11868BP + <i>Bifidobacterium breve</i> KCTC 11858BP + <i>Bifidobacterium animalis</i> subsp. <i>lactis</i> KCTC 11903BP + <i>Bifidobacterium longum</i> subsp. <i>longum</i> KCTC 11860BP + <i>Streptococcus salivarius</i> subsp. <i>thermophilus</i> KCTC 11870BP compared to placebo for adults with IBS (6x) .....                                                                                                                                                                                                                                               | 182 |
| <b>Question:</b> <i>Bifidobacterium bifidum</i> MIMBb75 compared to placebo for adults with IBS (6y) .....                                                                                                                                                                                                                                                                                                                                                                                                                                                                                                                                                                                                              | 185 |
| <b>Question:</b> <i>Bifidobacterium animalis</i> subsp. <i>animalis</i> DN-173 + <i>Streptococcus salivarius</i> subsp. <i>thermophilus</i> + <i>Lactobacillus delbrueckii</i> subsp. <i>bulgaricus</i> compared to placebo for adults with IBS (6z) .....                                                                                                                                                                                                                                                                                                                                                                                                                                                              | 187 |
| <b>Question:</b> <i>Lactobacillus paracasei</i> subsp. <i>paracasei</i> F-19 + <i>Lactobacillus acidophilus</i> LA-5 + <i>Bifidobacterium animalis</i> subsp. <i>lactis</i> Bb12 + <i>Lactobacillus delbrueckii</i> subsp. <i>bulgaricus</i> + <i>Streptococcus salivarius</i> subsp. <i>thermophilus</i> compared to placebo for adults with IBS (6aa) ....                                                                                                                                                                                                                                                                                                                                                            | 189 |
| <b>Question:</b> <i>Lactobacillus plantarum</i> CECT7484 and CECT7485 + <i>Pediococcus acidilactici</i> CECT7483 compared to placebo for adults with IBS (6ab) .....                                                                                                                                                                                                                                                                                                                                                                                                                                                                                                                                                    | 191 |
| <b>Question:</b> <i>Bifidobacterium longum</i> subsp. <i>infantis</i> M-63 + <i>Bifidobacterium breve</i> M-16V + <i>B. longum</i> Reuter ATCC BAA-999 compared to placebo for children with IBS (6ac) .....                                                                                                                                                                                                                                                                                                                                                                                                                                                                                                            | 193 |
| <b>Question:</b> <i>Lactobacillus brevis</i> KB290 compared to placebo for adults and children with IBS (6ad).....                                                                                                                                                                                                                                                                                                                                                                                                                                                                                                                                                                                                      | 195 |
| <b>Question:</b> <i>Lactobacillus casei</i> DG compared to placebo for adults with IBS (6ae).....                                                                                                                                                                                                                                                                                                                                                                                                                                                                                                                                                                                                                       | 197 |
| <b>Question:</b> <i>Lactobacillus acidophilus</i> NCFM + <i>Bifidobacterium animalis</i> subsp. <i>lactis</i> ATCC SD5220 compared to placebo for adults with IBS (6af) .....                                                                                                                                                                                                                                                                                                                                                                                                                                                                                                                                           | 198 |
| <b>Question:</b> <i>Lactobacillus acidophilus</i> CL1285 + <i>Lactobacillus casei</i> LBC80R + <i>Lactobacillus rhamnosus</i> CLR2 compared to placebo for adults with IBS (6ag) .....                                                                                                                                                                                                                                                                                                                                                                                                                                                                                                                                  | 200 |
| <b>Question:</b> <i>Bacillus subtilis</i> PXN 21 + <i>Bifidobacterium bifidum</i> PXN 23 + <i>Bifidobacterium breve</i> PXN 25 + <i>Bifidobacterium longum</i> subsp. <i>infantis</i> PXN 27 + <i>B. longum</i> subsp. <i>longum</i> PXN 30 + <i>Lactobacillus acidophilus</i> PXN 35 + <i>Lactobacillus delbrueckii</i> subsp. <i>bulgaricus</i> PXN39 + <i>Lactobacillus casei</i> PXN 37 + <i>Lactobacillus plantarum</i> PXN 47 + <i>Lactobacillus rhamnosus</i> PXN 54 + <i>Lactobacillus helveticus</i> PXN 45 + <i>Lactobacillus salivarius</i> PXN 57 + <i>Lactococcus lactis</i> PXN63 + <i>Streptococcus salivarius</i> subsp. <i>thermophilus</i> PXN 66 compared to placebo for adults with IBS (6ah) ..... | 202 |
| <b>Question:</b> <i>Bifidobacterium bifidum</i> BGN4 + <i>Bifidobacterium animalis</i> subsp. <i>lactis</i> AD011 + <i>Lactobacillus acidophilus</i> AD031 + <i>Lactobacillus casei</i> IBS041 compared to placebo for adults with IBS (6ai) .....                                                                                                                                                                                                                                                                                                                                                                                                                                                                      | 205 |
| <b>Question:</b> <i>Bifidobacterium longum</i> subsp. <i>longum</i> + <i>Lactobacillus acidophilus</i> compared to no probiotics for adults with IBS (6aj).....                                                                                                                                                                                                                                                                                                                                                                                                                                                                                                                                                         | 207 |
| <b>Question:</b> <i>Clostridium butyricum</i> compared to no probiotics for adults with IBS (6ak) .....                                                                                                                                                                                                                                                                                                                                                                                                                                                                                                                                                                                                                 | 209 |

|                                                                                                                                                                                                                                                                                                                                                     |     |
|-----------------------------------------------------------------------------------------------------------------------------------------------------------------------------------------------------------------------------------------------------------------------------------------------------------------------------------------------------|-----|
| <b>Question:</b> <i>Streptococcus salivarius</i> subsp. <i>thermophilus</i> MG510 + <i>Lactobacillus plantarum</i> LRCC5193 compared to no probiotics for adults with IBS (6al) .....                                                                                                                                                               | 211 |
| <b>Question:</b> <i>Bacillus coagulans</i> Unique IS2 compared to no probiotics for children with IBS (6am) .....                                                                                                                                                                                                                                   | 213 |
| <b>Question:</b> <i>Lactobacillus acidophilus</i> + <i>Lactobacillus rhamnosus</i> + <i>Bifidobacterium breve</i> + <i>Bifidobacterium animalis</i> subsp. <i>lactis</i> + <i>Bifidobacterium longum</i> subsp. <i>longum</i> + <i>Streptococcus salivarius</i> subsp. <i>thermophilus</i> compared to no probiotics for adults with IBS (6an). 215 |     |
| <b>Question:</b> <i>Bifidobacterium animalis</i> subsp. <i>lactis</i> Bb12 + <i>Lactobacillus acidophilus</i> LA-5 + <i>Lactobacillus delbrueckii</i> subsp. <i>bulgaricus</i> LBY-27 + <i>Streptococcus salivarius</i> subsp. <i>thermophilus</i> STY-31 compared to no probiotics for adults with IBS (6ao) .....                                 | 217 |
| <b>Question:</b> <i>Bifidobacterium longum</i> subsp. <i>longum</i> + <i>Bifidobacterium bifidum</i> + <i>Bifidobacterium animalis</i> subsp. <i>lactis</i> + <i>Lactobacillus acidophilus</i> + <i>Lactobacillus rhamnosus</i> + <i>Streptococcus salivarius</i> subsp. <i>thermophilus</i> compared to no probiotics for adults with IBS (6ap) .. | 219 |
| <b>Question:</b> <i>Bifidobacterium animalis</i> subsp. <i>lactis</i> W52 + <i>Lactobacillus casei</i> W56 + <i>Lactobacillus salivarius</i> W57 + <i>Lactococcus lactis</i> W58 + <i>Lactobacillus acidophilus</i> ATCC 700396 + <i>Lactobacillus rhamnosus</i> W71 compared to placebo for adults with IBS (6aq) .....                            | 221 |
| <b>Question:</b> <i>Lactobacillus rhamnosus</i> ATCC 53103 and LC705 + <i>Bifidobacterium breve</i> Bb99 + <i>Propionibacterium freudenreichii</i> subsp. <i>shermanii</i> JS compared to placebo for adults with IBS (6ar) .....                                                                                                                   | 223 |
| <b>Question:</b> <i>Lactobacillus rhamnosus</i> ATCC 53103 compared to no probiotics for children with IBS (6as) .....                                                                                                                                                                                                                              | 224 |
| Appendix 7: Should probiotics be used to reduce the duration or severity of diarrhea in children with acute infectious gastroenteritis? .....                                                                                                                                                                                                       | 226 |
| Bibliography .....                                                                                                                                                                                                                                                                                                                                  | 226 |
| <b>Question:</b> Probiotics compared to placebo and/or standard care alone for treatment of acute infectious diarrhea in children .....                                                                                                                                                                                                             | 233 |
| <b>Question:</b> <i>Saccharomyces boulardii</i> compared to placebo and/or standard care in patients with signs and/or symptoms suggestive of acute infectious gastroenteritis (7a) .....                                                                                                                                                           | 238 |
| <b>Question:</b> <i>Lactobacillus rhamnosus</i> ATCC 53103 compared to placebo in patients with signs and/or symptoms suggestive of acute infectious gastroenteritis (7b) .....                                                                                                                                                                     | 241 |
| <b>Question:</b> <i>Lactobacillus acidophilus</i> compared to placebo in patients with signs and/or symptoms suggestive of acute infectious gastroenteritis (7c) .....                                                                                                                                                                              | 246 |
| <b>Question:</b> <i>Lactobacillus acidophilus</i> + <i>Bifidobacterium bifidum</i> compared to placebo for the treatment of acute infectious diarrhea in children (7d) .....                                                                                                                                                                        | 248 |
| <b>Question:</b> <i>Lactobacillus reuteri</i> compared to placebo in patients with signs and/or symptoms suggestive of acute infectious gastroenteritis (7e) .....                                                                                                                                                                                  | 250 |

|                                                                                                                                                                                                                                                                                                                                                                                                                                                                                                                                             |     |
|---------------------------------------------------------------------------------------------------------------------------------------------------------------------------------------------------------------------------------------------------------------------------------------------------------------------------------------------------------------------------------------------------------------------------------------------------------------------------------------------------------------------------------------------|-----|
| <b>Question:</b> <i>Lactobacillus helveticus</i> Rosell-52 + <i>Lactobacillus rhamnosus</i> Rosell-11 compared to placebo in patients with signs and/or symptoms suggestive of acute infectious gastroenteritis (7f) .....                                                                                                                                                                                                                                                                                                                  | 252 |
| <b>Question:</b> <i>Bifidobacterium animalis</i> subsp. <i>lactis</i> compared to placebo for treatment of acute infectious diarrhea in children (7g) .....                                                                                                                                                                                                                                                                                                                                                                                 | 255 |
| <b>Question:</b> <i>Streptococcus salivarius</i> subsp. <i>thermophilus</i> + <i>Lactobacillus delbrueckii</i> subsp. <i>bulgaricus</i> compared to placebo and/or standard care in patients with signs and/or symptoms suggestive of acute infectious gastroenteritis (7h).....                                                                                                                                                                                                                                                            | 257 |
| <b>Question:</b> <i>Enterococcus faecium</i> SF68 compared to placebo and/or standard care in patients with signs and/or symptoms suggestive of acute infectious gastroenteritis (7i).....                                                                                                                                                                                                                                                                                                                                                  | 259 |
| <b>Question:</b> <i>Escherichia coli</i> Nissle 1917 compared to placebo and/or standard care in patients with signs and/or symptoms suggestive of acute infectious gastroenteritis (7j).....                                                                                                                                                                                                                                                                                                                                               | 261 |
| <b>Question:</b> <i>Bacillus mesentericus</i> + <i>Clostridium butyricum</i> + <i>Enterococcus faecalis</i> compared to placebo/standard of care for treatment of acute infectious diarrhea in children (7k).....                                                                                                                                                                                                                                                                                                                           | 263 |
| <b>Question:</b> <i>Lactobacillus acidophilus</i> + <i>Lactobacillus rhamnosus</i> + <i>Bifidobacterium longum</i> subsp. <i>longum</i> + <i>Saccharomyces boulardii</i> compared to placebo for treatment of acute infectious diarrhea (7l).....                                                                                                                                                                                                                                                                                           | 265 |
| <b>Question:</b> <i>Lactobacillus rhamnosus</i> 19070-2 + <i>Lactobacillus reuteri</i> DSM 12246 compared to placebo and/or standard care in patients with signs and/or symptoms suggestive of acute infectious gastroenteritis (7m).....                                                                                                                                                                                                                                                                                                   | 267 |
| <b>Question:</b> <i>Lactobacillus casei</i> Shirota compared to placebo and/or standard care in patients with signs and/or symptoms suggestive of acute infectious gastroenteritis (7n).....                                                                                                                                                                                                                                                                                                                                                | 268 |
| <b>Question:</b> <i>Lactobacillus paracasei</i> subsp. <i>paracasei</i> + <i>Lactobacillus plantarum</i> + <i>Lactobacillus acidophilus</i> + <i>Lactobacillus delbrueckii</i> subsp. <i>bulgaricus</i> + <i>Bifidobacterium longum</i> subsp. <i>longum</i> + <i>Bifidobacterium breve</i> + <i>B. longum</i> subsp. <i>infantis</i> + <i>Streptococcus salivarius</i> subsp. <i>thermophilus</i> compared to placebo and/or standard care in patients with signs and/or symptoms suggestive of acute infectious gastroenteritis (7o)..... | 269 |
| <b>Question:</b> <i>Enterococcus faecalis</i> + <i>Clostridium butyricum</i> + <i>Bacillus mesentericus</i> + <i>Bacillus coagulans</i> compared to placebo and/or standard care in patients with signs and/or symptoms suggestive of acute infectious gastroenteritis (7p).....                                                                                                                                                                                                                                                            | 271 |
| <b>Question:</b> <i>Bifidobacterium longum</i> subsp. <i>longum</i> + <i>Bifidobacterium animalis</i> subsp. <i>lactis</i> + <i>Lactobacillus acidophilus</i> + <i>Lactobacillus rhamnosus</i> + <i>Lactobacillus plantarum</i> + <i>Pediococcus pentosaceus</i> compared to placebo for the treatment of acute infectious diarrhea in children (7q).....                                                                                                                                                                                   | 273 |
| <b>Question:</b> <i>Lactobacillus paracasei</i> subsp. <i>paracasei</i> ST11 compared to placebo and/or standard care in patients with signs and/or symptoms suggestive of acute infectious gastroenteritis (7t) .....                                                                                                                                                                                                                                                                                                                      | 275 |

|                                                                                                                                                                                                                                                                                         |     |
|-----------------------------------------------------------------------------------------------------------------------------------------------------------------------------------------------------------------------------------------------------------------------------------------|-----|
| <b>Question:</b> <i>Lactobacillus acidophilus</i> + <i>Bifidobacterium bifidum</i> + <i>Lactobacillus delbrueckii</i> subsp. <i>bulgaricus</i> compared to placebo and/or standard care in patients with signs and/or symptoms suggestive of acute infectious gastroenteritis (7u)..... | 276 |
| <b>Question:</b> <i>Bifidobacterium ruminatum</i> compared to placebo and/or standard care in patients with signs and/or symptoms suggestive of acute infectious gastroenteritis (7v).....                                                                                              | 278 |
| <b>Question:</b> <i>Lactobacillus rhamnosus</i> 573L/1 and 573L/2 and 573L/3 compared to placebo and/or standard care in patients with signs and/or symptoms suggestive of acute infectious gastroenteritis (7w) .....                                                                  | 279 |
| <b>Question:</b> <i>Lactobacillus acidophilus</i> + “Bifidobacter” compared to placebo for the treatment of acute infectious diarrhea in children (7x) ....                                                                                                                             | 280 |
| Appendix 8: Should probiotics be used in preterm, low birth weight infants? .....                                                                                                                                                                                                       | 281 |
| <b>Question:</b> Single- and multiple-strain probiotics compared with no probiotics for preterm, low birth weight infants (8a) .....                                                                                                                                                    | 281 |



## Appendix 1: Should probiotics be used as part of the treatment of *Clostridioides difficile* infection?

### Bibliography

Included from: Pillai A, Nelson R. Probiotics for treatment of Clostridium difficile-associated colitis in adults. Cochrane Database Syst Rev 2008;CD004611.

Lawrence SJ, Korzenik JR, Mundy LM. Probiotics for recurrent Clostridium difficile disease. J Med Microbiol 2005;54:905-6.

McFarland LV, Surawicz CM, Greenberg RN, et al. A randomized placebo-controlled trial of Saccharomyces boulardii in combination with standard antibiotics for Clostridium difficile disease. JAMA 1994;271:1913-8.

Surawicz CM, McFarland LV, Greenberg RN, et al. The search for a better treatment for recurrent Clostridium difficile disease: use of high-dose vancomycin combined with Saccharomyces boulardii. Clin Infect Dis 2000;31:1012-7.

Wullt M, Hagslatt ML, Odenholt I. Lactobacillus plantarum 299v for the treatment of recurrent Clostridium difficile-associated diarrhoea: a double-blind, placebo-controlled trial. Scand J Infect Dis 2003;35:365-7.

Barker AK, Duster M, Valentine S, et al. A randomized controlled trial of probiotics for Clostridium difficile infection in adults (PICO). J Antimicrob Chemother 2017;72:3177-80.

Question: *Saccharomyces boulardii* compared to placebo/antibiotics in symptomatic patients with confirmed *C. difficile* infection (1a)

Bibliography: McFarland 1994, Surawicz 2000

| Certainty assessment |              |              |               |              |             |                      | № of patients       |                     | Effect            |                   | Certainty | Importance |
|----------------------|--------------|--------------|---------------|--------------|-------------|----------------------|---------------------|---------------------|-------------------|-------------------|-----------|------------|
| № of studies         | Study design | Risk of bias | Inconsistency | Indirectness | Imprecision | Other considerations | <i>S. boulardii</i> | Placebo/Antibiotics | Relative (95% CI) | Absolute (95% CI) |           |            |

**Cessation of Diarrhea in Patients with initial or recurrent disease**

|   |                   |             |             |                      |                      |      |               |               |                                  |                                                         |             |          |
|---|-------------------|-------------|-------------|----------------------|----------------------|------|---------------|---------------|----------------------------------|---------------------------------------------------------|-------------|----------|
| 1 | randomised trials | not serious | not serious | serious <sup>a</sup> | serious <sup>b</sup> | none | 42/57 (73.7%) | 37/67 (55.2%) | <b>RR 1.33</b><br>(1.02 to 1.74) | <b>182 more per 1,000</b><br>(from 11 more to 409 more) | ⊕⊕○○<br>LOW | CRITICAL |
|---|-------------------|-------------|-------------|----------------------|----------------------|------|---------------|---------------|----------------------------------|---------------------------------------------------------|-------------|----------|

**Recurrence of Diarrhea in patients with initial or recurrent disease**

|   |                   |             |             |                      |                      |      |               |               |                                  |                                                           |             |          |
|---|-------------------|-------------|-------------|----------------------|----------------------|------|---------------|---------------|----------------------------------|-----------------------------------------------------------|-------------|----------|
| 1 | randomised trials | not serious | not serious | serious <sup>a</sup> | serious <sup>b</sup> | none | 15/57 (26.3%) | 30/67 (44.8%) | <b>RR 0.59</b><br>(0.35 to 0.98) | <b>184 fewer per 1,000</b><br>(from 291 fewer to 9 fewer) | ⊕⊕○○<br>LOW | CRITICAL |
|---|-------------------|-------------|-------------|----------------------|----------------------|------|---------------|---------------|----------------------------------|-----------------------------------------------------------|-------------|----------|

**Treatment-related Adverse Events in patients with initial or recurrent disease**

|   |                   |             |             |                      |                      |      |                                                                                                                                                    |  |  |             |          |
|---|-------------------|-------------|-------------|----------------------|----------------------|------|----------------------------------------------------------------------------------------------------------------------------------------------------|--|--|-------------|----------|
| 1 | randomised trials | not serious | not serious | serious <sup>a</sup> | serious <sup>c</sup> | none | Statistically significant increase in thirst (P = 0.02) and constipation (P = 0.03) in patients receiving <i>S. boulardii</i> compared to placebo. |  |  | ⊕⊕○○<br>LOW | CRITICAL |
|---|-------------------|-------------|-------------|----------------------|----------------------|------|----------------------------------------------------------------------------------------------------------------------------------------------------|--|--|-------------|----------|

**Cessation of diarrhea in patients with recurrent disease only**

| Certainty assessment      |                   |              |               |                      |                      |                      | N <sup>o</sup> of patients |                     | Effect                        |                                                       | Certainty   | Importance |
|---------------------------|-------------------|--------------|---------------|----------------------|----------------------|----------------------|----------------------------|---------------------|-------------------------------|-------------------------------------------------------|-------------|------------|
| N <sup>o</sup> of studies | Study design      | Risk of bias | Inconsistency | Indirectness         | Imprecision          | Other considerations | <i>S. boulardii</i>        | Placebo/Antibiotics | Relative (95% CI)             | Absolute (95% CI)                                     |             |            |
| 1                         | randomised trials | not serious  | not serious   | serious <sup>d</sup> | serious <sup>b</sup> | none                 | 15/18 (83.3%)              | 7/17 (41.2%)        | <b>RR 1.67</b> (0.95 to 2.93) | <b>276 more per 1,000</b> (from 21 fewer to 795 more) | ⊕⊕○○<br>LOW | CRITICAL   |

#### Recurrence of diarrhea in patients with recurrent disease only

|   |                   |             |             |                      |                      |      |              |              |                               |                                                        |             |          |
|---|-------------------|-------------|-------------|----------------------|----------------------|------|--------------|--------------|-------------------------------|--------------------------------------------------------|-------------|----------|
| 1 | randomised trials | not serious | not serious | serious <sup>d</sup> | serious <sup>b</sup> | none | 3/18 (16.7%) | 7/14 (50.0%) | <b>RR 0.33</b> (0.10 to 1.06) | <b>335 fewer per 1,000</b> (from 450 fewer to 30 more) | ⊕⊕○○<br>LOW | CRITICAL |
|---|-------------------|-------------|-------------|----------------------|----------------------|------|--------------|--------------|-------------------------------|--------------------------------------------------------|-------------|----------|

#### Treatment-related Adverse Events in patients with recurrent disease only

|   |                   |             |             |                      |                      |      |                                                                                                                                                                                                                      |  |  |             |          |
|---|-------------------|-------------|-------------|----------------------|----------------------|------|----------------------------------------------------------------------------------------------------------------------------------------------------------------------------------------------------------------------|--|--|-------------|----------|
| 1 | randomised trials | not serious | not serious | serious <sup>d</sup> | serious <sup>c</sup> | none | No statistically significant differences in the number or type of adverse events in patients treated with <i>S. boulardii</i> or placebo, and that no adverse events occurred during the four-week follow-up period. |  |  | ⊕⊕○○<br>LOW | CRITICAL |
|---|-------------------|-------------|-------------|----------------------|----------------------|------|----------------------------------------------------------------------------------------------------------------------------------------------------------------------------------------------------------------------|--|--|-------------|----------|

CI: Confidence interval; RR: Risk ratio

## Explanations

a. Some indirectness identified based on difference in populations with regards to initial and/or recurrent infection (McFarland 1994) or just recurrent infection (Surawicz 2000). Additionally, indirectness identified based on comparators: placebo reported for McFarland 1994 and high dose vancomycin reported for Surawicz 2000.

b. The 95% CI includes the potential for both appreciable benefit as well as appreciable harm. Few events reported do not meet the optimal information size and suggest fragility in the estimate.

c. No raw data reported. Few events reported do not meet the optimal information size and suggest fragility in the estimate.

d. Some indirectness identified based on difference in populations with regards to initial and/or recurrent infection (McFarland 1994) or just recurrent infection (Surawicz 2000). Additionally, indirectness identified based on comparators: high dose vancomycin reported for Surawicz 2000.

## Forest Plots

Comparison: 1 S.bouardii versus placebo

Outcome: 2 Recurrence of diarrhea

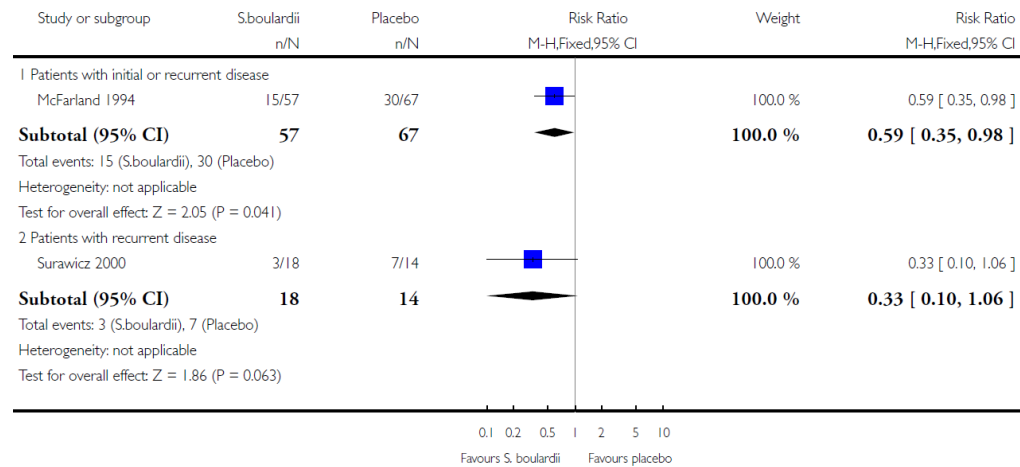

Comparison: 1 S.bouardii versus placebo

Outcome: 1 Cessation of diarrhea

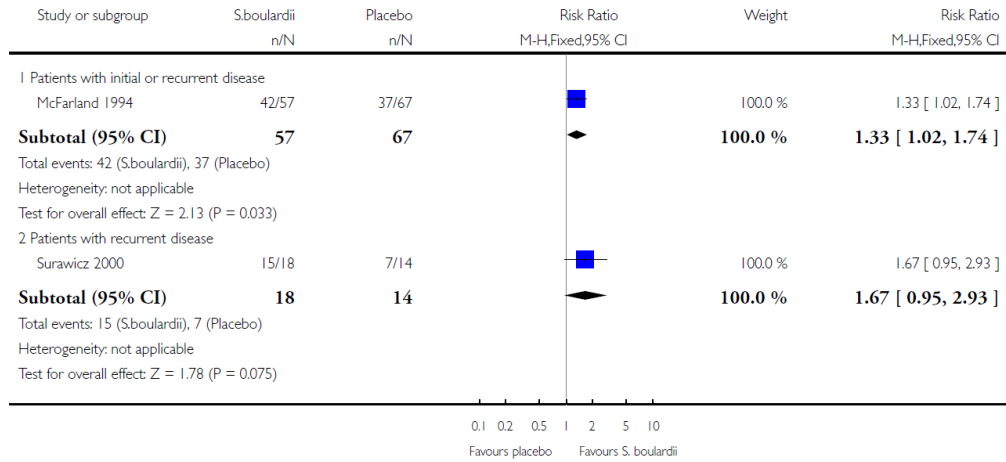

**Question:** *Lactobacillus plantarum* 299v compared to placebo/antibiotics in symptomatic patients with confirmed *C. difficile* infection (1b)

**Bibliography:** Wullt 2003

| Certainty assessment |              |              |               |              |             |                      | N° of patients           |                     | Effect            |                   | Certainty | Importance |
|----------------------|--------------|--------------|---------------|--------------|-------------|----------------------|--------------------------|---------------------|-------------------|-------------------|-----------|------------|
| N° of studies        | Study design | Risk of bias | Inconsistency | Indirectness | Imprecision | Other considerations | <i>L. plantarum</i> 299v | Placebo/Antibiotics | Relative (95% CI) | Absolute (95% CI) |           |            |

**Cessation of Diarrhea**

| Certainty assessment |                   |              |               |                      |                           |                      | № of patients            |                     | Effect                        |                                                        | Certainty        | Importance |
|----------------------|-------------------|--------------|---------------|----------------------|---------------------------|----------------------|--------------------------|---------------------|-------------------------------|--------------------------------------------------------|------------------|------------|
| № of studies         | Study design      | Risk of bias | Inconsistency | Indirectness         | Imprecision               | Other considerations | <i>L. plantarum</i> 299v | Placebo/Antibiotics | Relative (95% CI)             | Absolute (95% CI)                                      |                  |            |
| 1                    | randomised trials | not serious  | not serious   | serious <sup>a</sup> | very serious <sup>b</sup> | none                 | 11/12 (91.7%)            | 9/9 (100.0%)        | <b>RR 0.93</b> (0.73 to 1.19) | <b>70 fewer per 1,000</b> (from 270 fewer to 190 more) | ⊕○○○<br>VERY LOW | CRITICAL   |

#### Recurrence of Diarrhea

|   |                   |             |             |                      |                           |      |              |             |                               |                                                         |                  |          |
|---|-------------------|-------------|-------------|----------------------|---------------------------|------|--------------|-------------|-------------------------------|---------------------------------------------------------|------------------|----------|
| 1 | randomised trials | not serious | not serious | serious <sup>a</sup> | very serious <sup>b</sup> | none | 4/11 (36.4%) | 6/9 (66.7%) | <b>RR 0.55</b> (0.22 to 1.35) | <b>300 fewer per 1,000</b> (from 520 fewer to 233 more) | ⊕○○○<br>VERY LOW | CRITICAL |
|---|-------------------|-------------|-------------|----------------------|---------------------------|------|--------------|-------------|-------------------------------|---------------------------------------------------------|------------------|----------|

#### Bacteriological Cure (Resolution of CDI) (follow up: range 11 days to 13 days; assessed with: Negative assay for *C. difficile* toxin)

|   |                   |             |             |                      |                           |      |              |             |                               |                                                         |                  |          |
|---|-------------------|-------------|-------------|----------------------|---------------------------|------|--------------|-------------|-------------------------------|---------------------------------------------------------|------------------|----------|
| 1 | randomised trials | not serious | not serious | serious <sup>a</sup> | very serious <sup>b</sup> | none | 7/12 (58.3%) | 7/9 (77.8%) | <b>RR 0.75</b> (0.41 to 1.36) | <b>194 fewer per 1,000</b> (from 459 fewer to 280 more) | ⊕○○○<br>VERY LOW | CRITICAL |
|---|-------------------|-------------|-------------|----------------------|---------------------------|------|--------------|-------------|-------------------------------|---------------------------------------------------------|------------------|----------|

#### Treatment-related Adverse Events

|   |                   |             |             |                      |                      |      |             |            |               |  |             |          |
|---|-------------------|-------------|-------------|----------------------|----------------------|------|-------------|------------|---------------|--|-------------|----------|
| 1 | randomised trials | not serious | not serious | serious <sup>a</sup> | serious <sup>c</sup> | none | 0/12 (0.0%) | 0/9 (0.0%) | not estimable |  | ⊕⊕○○<br>LOW | CRITICAL |
|---|-------------------|-------------|-------------|----------------------|----------------------|------|-------------|------------|---------------|--|-------------|----------|

CI: Confidence interval; RR: Risk ratio

## Explanations

- a. Study only reports on adults; therefore, these findings may not be generalizable to children.
- b. The 95% CI includes the potential for both appreciable benefit as well as appreciable harm. Few events reported do not meet the optimal information size and suggest fragility in the estimate.
- c. No events reported out of small sample.

## Forest Plots

Comparison: 2 L. plantarum versus placebo

Outcome: 1 Cessation of diarrhea

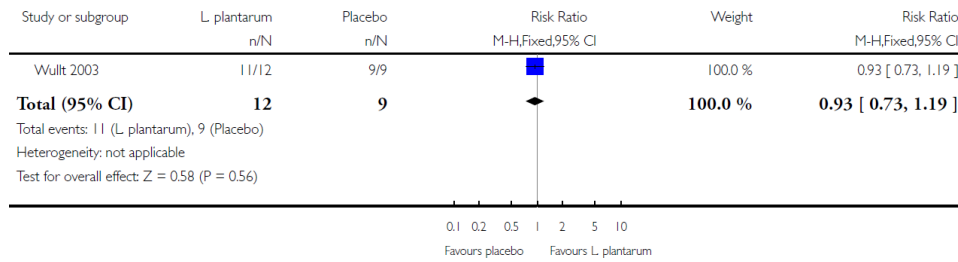

Comparison: 2 L. plantarum versus placebo

Outcome: 2 Recurrence of diarrhea

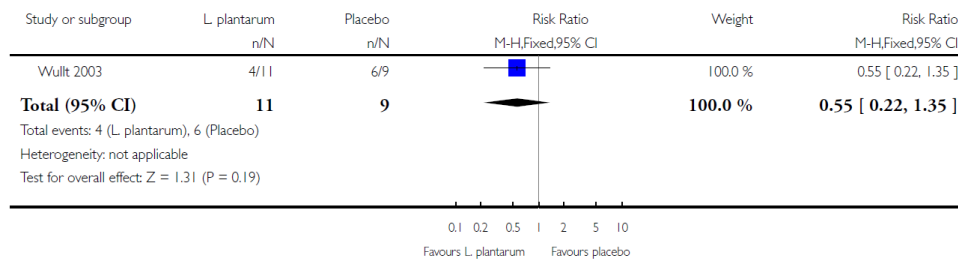

Comparison: 2 L. plantarum versus placebo

Outcome: 3 Bacteriological cure

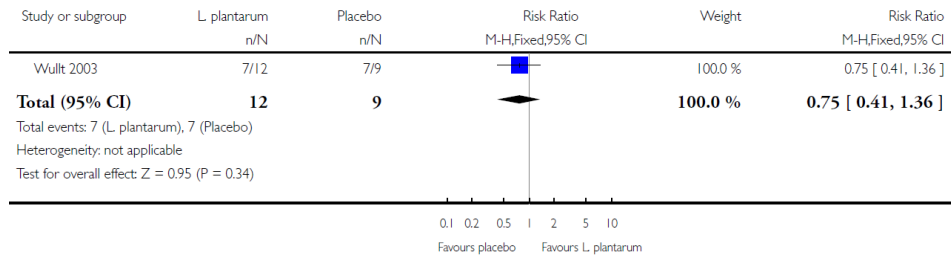



Question: *Lactobacillus rhamnosus* ATCC 53103 compared to placebo/antibiotics in symptomatic patients with confirmed *C. difficile* infection (1c)

Bibliography: Lawrence 2005

| Certainty assessment |              |              |               |              |             |                      | № of patients                  |                     | Effect            |                   | Certainty | Importance |
|----------------------|--------------|--------------|---------------|--------------|-------------|----------------------|--------------------------------|---------------------|-------------------|-------------------|-----------|------------|
| № of studies         | Study design | Risk of bias | Inconsistency | Indirectness | Imprecision | Other considerations | <i>L. rhamnosus</i> ATCC 53103 | Placebo/Antibiotics | Relative (95% CI) | Absolute (95% CI) |           |            |

**Recurrent *C. difficile*-associated Diarrhea**

|   |                   |                          |             |                      |                           |      |             |             |                                   |                                                            |                  |          |
|---|-------------------|--------------------------|-------------|----------------------|---------------------------|------|-------------|-------------|-----------------------------------|------------------------------------------------------------|------------------|----------|
| 1 | randomised trials | not serious <sup>a</sup> | not serious | serious <sup>b</sup> | very serious <sup>c</sup> | none | 3/8 (37.5%) | 1/7 (14.3%) | <b>RR 2.63</b><br>(0.35 to 19.85) | <b>233 more per 1,000</b><br>(from 93 fewer to 1,000 more) | ⊕○○○<br>VERY LOW | CRITICAL |
|---|-------------------|--------------------------|-------------|----------------------|---------------------------|------|-------------|-------------|-----------------------------------|------------------------------------------------------------|------------------|----------|

**Treatment-related Adverse Events**

|   |                   |                          |             |                      |                      |      |                                                                                                                                          |  |             |          |
|---|-------------------|--------------------------|-------------|----------------------|----------------------|------|------------------------------------------------------------------------------------------------------------------------------------------|--|-------------|----------|
| 1 | randomised trials | not serious <sup>a</sup> | not serious | serious <sup>b</sup> | serious <sup>d</sup> | none | Mild gastrointestinal upset with bloating (25%) and flatulence (37.5%) reported in patients treated with <i>L. rhamnosus</i> ATCC 53103. |  | ⊕⊕○○<br>LOW | CRITICAL |
|---|-------------------|--------------------------|-------------|----------------------|----------------------|------|------------------------------------------------------------------------------------------------------------------------------------------|--|-------------|----------|

CI: Confidence interval; RR: Risk ratio

## Explanations

a. Type of antibiotic and duration of antibiotic dosing is unclear.

b. Reported study population includes adults only. May not be generalizable to the entire population.

c. The 95% CI includes the potential for both appreciable benefit as well as appreciable harm. Few events reported do not meet the optimal information size and suggest fragility in the estimate.

d. Few events reported do not meet the optimal information size and suggest fragility in the estimate.

## Forest Plots

Comparison: 3 Lactobacillus rhamnosus GG versus placebo

Outcome: 1 Recurrent CDAD

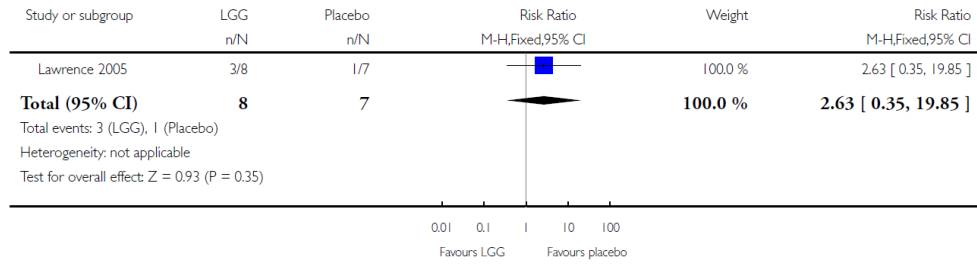

**Question:** *Lactobacillus acidophilus* ATCC 700396 + *Lactobacillus paracasei* subsp. *paracasei* ATCC 335 + *Bifidobacterium animalis* subsp. *lactis* ATCC SD5220 and ATCC SD5219 compared to placebo/antibiotics in symptomatic patients with confirmed *C. difficile* infection (1d)

**Bibliography:** Barker 2017

| Certainty assessment |              |              |               |              |             |                      | No of patients                                                                                                                                                 |                     | Effect            |                   | Certainty | Importance |
|----------------------|--------------|--------------|---------------|--------------|-------------|----------------------|----------------------------------------------------------------------------------------------------------------------------------------------------------------|---------------------|-------------------|-------------------|-----------|------------|
| No of studies        | Study design | Risk of bias | Inconsistency | Indirectness | Imprecision | Other considerations | <i>L. acidophilus</i> ATCC 700396 + <i>L. paracasei</i> subsp. <i>paracasei</i> ATCC 335 + <i>B. animalis</i> subsp. <i>lactis</i> ATCC SD5220 and ATCC SD5219 | Placebo/Antibiotics | Relative (95% CI) | Absolute (95% CI) |           |            |

**C. difficile infection Recurrence**

|   |                   |                      |             |                      |                      |      |             |             |                                   |                                                            |                  |          |
|---|-------------------|----------------------|-------------|----------------------|----------------------|------|-------------|-------------|-----------------------------------|------------------------------------------------------------|------------------|----------|
| 1 | randomised trials | serious <sup>a</sup> | not serious | serious <sup>b</sup> | serious <sup>c</sup> | none | 1/15 (6.7%) | 1/13 (7.7%) | <b>RR 0.86</b><br>(0.05 to 15.22) | <b>11 fewer per 1,000</b><br>(from 73 fewer to 1,000 more) | ⊕○○○<br>VERY LOW | CRITICAL |
|---|-------------------|----------------------|-------------|----------------------|----------------------|------|-------------|-------------|-----------------------------------|------------------------------------------------------------|------------------|----------|

**Treatment-related Adverse Events (follow up: 8 weeks)**

| Certainty assessment |                   |                      |               |                        |                      |                      | № of patients                                                                                                                                                  |                     | Effect                        |                                                        | Certainty        | Importance |
|----------------------|-------------------|----------------------|---------------|------------------------|----------------------|----------------------|----------------------------------------------------------------------------------------------------------------------------------------------------------------|---------------------|-------------------------------|--------------------------------------------------------|------------------|------------|
| № of studies         | Study design      | Risk of bias         | Inconsistency | Indirectness           | Imprecision          | Other considerations | <i>L. acidophilus</i> ATCC 700396 + <i>L. paracasei</i> subsp. <i>paracasei</i> ATCC 335 + <i>B. animalis</i> subsp. <i>lactis</i> ATCC SD5220 and ATCC SD5219 | Placebo/Antibiotics | Relative (95% CI)             | Absolute (95% CI)                                      |                  |            |
| 1                    | randomised trials | serious <sup>a</sup> | not serious   | serious <sup>b,d</sup> | serious <sup>c</sup> | none                 | 12/16 (75.0%)                                                                                                                                                  | 12/15 (80.0%)       | <b>RR 0.94</b> (0.64 to 1.37) | <b>48 fewer per 1,000</b> (from 288 fewer to 296 more) | ⊕○○○<br>VERY LOW | CRITICAL   |

CI: Confidence interval; RR: Risk ratio

## Explanations

- a. Concerns for risk of bias based on selective reporting and incomplete outcome data.
- b. Study included only adult population and may not be generalizable to the entire population.
- c. The 95% CI includes the potential for both appreciable benefit as well as appreciable harm. Few events reported do not meet the optimal information size and suggest fragility in the estimate.
- d. Outcome reports on any GI discomfort experienced by participants; however, does not specify those related to the use of probiotics alone.

Forest Plots

*C. difficile* Recurrence

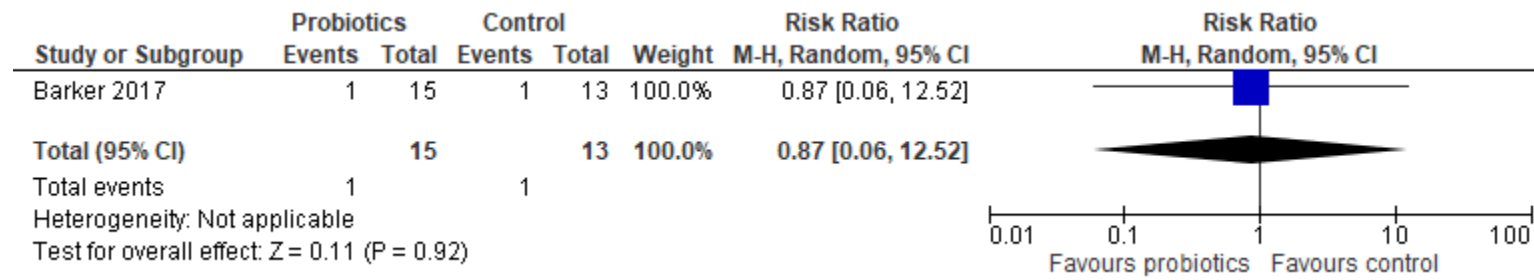

## Appendix 2: Should probiotics be used in the prevention of *Clostridioides difficile*-associated diarrhea?

### Bibliography

Included from: Goldenberg JZ, Yap C, Lytvyn L, et al. Probiotics for the prevention of *Clostridium difficile*-associated diarrhea in adults and children. *Cochrane Database Syst Rev* 2017;12:CD006095.

Allen SJ, Wareham K, Wang D, et al. Lactobacilli and bifidobacteria in the prevention of antibiotic-associated diarrhoea and *Clostridium difficile* diarrhoea in older inpatients (PLACIDE): a randomised, double-blind, placebo-controlled, multicentre trial. *Lancet* 2013;382:1249-57.

Arvola T, Laiho K, Torkkeli S, et al. Prophylactic *Lactobacillus GG* reduces antibiotic-associated diarrhea in children with respiratory infections: a randomized study. *Pediatrics* 1999;104:e64.

Beausoleil M, Fortier N, Guenette S, et al. Effect of a fermented milk combining *Lactobacillus acidophilus* CI1285 and *Lactobacillus casei* in the prevention of antibiotic-associated diarrhea: a randomized, double-blind, placebo-controlled trial. *Can J Gastroenterol* 2007;21:732-6.

Bravo MV, Bunout D, Leiva L, et al. [Effect of probiotic *Saccharomyces boulardii* on prevention of antibiotic-associated diarrhea in adult outpatients with amoxicillin treatment]. *Rev Med Chil* 2008;136:981-8.

Can M, Besirbellioglu BA, Avci IY, Beker CM, Pahsa A. Prophylactic *Saccharomyces boulardii* in the prevention of antibiotic-associated diarrhea: a prospective study. *Med Sci Monit* 2006;12:PI19-22.

Cindoruk M, Erkan G, Karakan T, Dursun A, Unal S. Efficacy and safety of *Saccharomyces boulardii* in the 14-day triple anti-*Helicobacter pylori* therapy: a prospective randomized placebo-controlled double-blind study. *Helicobacter* 2007;12:309-16.

Duman DG, Bor S, Ozutemiz O, et al. Efficacy and safety of *Saccharomyces boulardii* in prevention of antibiotic-associated diarrhoea due to *Helicobacter pylori* eradication. *Eur J Gastroenterol Hepatol* 2005;17:1357-61.

Ehrhardt S, Guo N, Hinz R, et al. *Saccharomyces boulardii* to Prevent Antibiotic-Associated Diarrhea: A Randomized, Double-Masked, Placebo-Controlled Trial. *Open Forum Infect Dis* 2016;3:ofw011.

Fominykh Y, Aakharenko S, Koning C, Uspenskiy Y. The effect of a multispecies probiotic on the intestinal microbiota during antibiotic therapy. *United European Gastroenterology Journal* 2013;1S:A248.

Gao XW, Mubasher M, Fang CY, Reifer C, Miller LE. Dose-response efficacy of a proprietary probiotic formula of *Lactobacillus acidophilus* CL1285 and *Lactobacillus casei* LBC80R for antibiotic-associated diarrhea and *Clostridium difficile*-associated diarrhea prophylaxis in adult patients. *Am J Gastroenterol* 2010;105:1636-41.

Georgieva M, Pancheva R, Rasheva N, Usheva N, Ivanova L, Koleva K. Use of the probiotic *Lactobacillus reuteri* DSM 17938 in the prevention of antibiotic-associated infections in hospitalized Bulgarian children: a randomized, controlled trial. *Journal of IMAB* 2015;21:895-900.

Hickson M, D'Souza AL, Muthu N, et al. Use of probiotic *Lactobacillus* preparation to prevent diarrhoea associated with antibiotics: randomised double blind placebo controlled trial. *BMJ* 2007;335:80.

Imase K, Takahashi M, Tanaka A, et al. Efficacy of *Clostridium butyricum* preparation concomitantly with *Helicobacter pylori* eradication therapy in relation to changes in the intestinal microbiota. *Microbiol Immunol* 2008;52:156-61.

Klarin B, Wullt M, Palmquist I, Molin G, Larsson A, Jeppsson B. *Lactobacillus plantarum* 299v reduces colonisation of *Clostridium difficile* in critically ill patients treated with antibiotics. *Acta Anaesthesiol Scand* 2008;52:1096-102.

Koning CJ, Jonkers DM, Stobberingh EE, Mulder L, Rombouts FM, Stockbrugger RW. The effect of a multispecies probiotic on the intestinal microbiota and bowel movements in healthy volunteers taking the antibiotic amoxicillin. *Am J Gastroenterol* 2008;103:178-89.

Kotowska M, Albrecht P, Szajewska H. *Saccharomyces boulardii* in the prevention of antibiotic-associated diarrhoea in children: a randomized double-blind placebo-controlled trial. *Aliment Pharmacol Ther* 2005;21:583-90.

Lewis SJ, Potts LF, Barry RE. The lack of therapeutic effect of *Saccharomyces boulardii* in the prevention of antibiotic-related diarrhoea in elderly patients. *J Infect* 1998;36:171-4.

Lonnermark E, Friman V, Lappas G, Sandberg T, Berggren A, Adlerberth I. Intake of *Lactobacillus plantarum* reduces certain gastrointestinal symptoms during treatment with antibiotics. *J Clin Gastroenterol* 2010;44:106-12.

McFarland LV, Surawicz CM, Greenberg RN, et al. Prevention of beta-lactam-associated diarrhea by *Saccharomyces boulardii* compared with placebo. *Am J Gastroenterol* 1995;90:439-48.

Miller. Unpublished data, 2008a. As cited in: Goldenberg JZ, Yap C, Lytvyn L, et al. Probiotics for the prevention of *Clostridium difficile*-associated diarrhea in adults and children. *Cochrane Database Syst Rev* 2017;12:CD006095.

Miller. Unpublished data, 2008b. As cited in: Goldenberg JZ, Yap C, Lytvyn L, et al. Probiotics for the prevention of *Clostridium difficile*-associated diarrhea in adults and children. *Cochrane Database Syst Rev* 2017;12:CD006095.

Nord CE, Lidbeck A, Orrhage K, Sjostedt S. Oral supplementation with lactic acid-producing bacteria during intake of clindamycin. *Clin Microbiol Infect* 1997;3:124-32.

Ouwehand AC, DongLian C, Weijian X, et al. Probiotics reduce symptoms of antibiotic use in a hospital setting: a randomized dose response study. *Vaccine* 2014;32:458-63.

Pancheva R, Stoeva K, Georgieva M, et al. A randomized controlled trial on the effect of a combination of *Lactobacillus acidophilus*, *Lactobacillus delbruecki* subsp. *bulgaricus* and *Bifidobacterium bifidum* in the prophylaxis of vomiting and diarrhea of hospitalized children 1 to 7 years of age. *J Pediatr Gastroenterol Nutr* 2009;38:E111.

Plummer S, Weaver MA, Harris JC, Dee P, Hunter J. *Clostridium difficile* pilot study: effects of probiotic supplementation on the incidence of *C. difficile* diarrhoea. *Int Microbiol* 2004;7:59-62.

Pozzoni P, Riva A, Bellatorre AG, et al. *Saccharomyces boulardii* for the prevention of antibiotic-associated diarrhea in adult hospitalized patients: a single-center, randomized, double-blind, placebo-controlled trial. *Am J Gastroenterol* 2012;107:922-31.

Sampalis J, Psaradellis E, Rampakakis E. Efficacy of BIO K+ CL1285 in the reduction of antibiotic-associated diarrhea - a placebo controlled double-blind randomized, multi-center study. *Arch Med Sci* 2010;6:56-64.

Rafiq. Unpublished data, 2007. As cited in: Goldenberg JZ, Yap C, Lytvyn L, et al. Probiotics for the prevention of *Clostridium difficile*-associated diarrhea in adults and children. *Cochrane Database Syst Rev* 2017;12:CD006095.

Ruszczynski M, Radzikowski A, Szajewska H. Clinical trial: effectiveness of *Lactobacillus rhamnosus* (strains E/N, Oxy and Pen) in the prevention of antibiotic-associated diarrhoea in children. *Aliment Pharmacol Ther* 2008;28:154-61.

Safdar N, Barigala R, Said A, McKinley L. Feasibility and tolerability of probiotics for prevention of antibiotic-associated diarrhoea in hospitalized US military veterans. *J Clin Pharm Ther* 2008;33:663-8.

Selinger CP, Bell A, Cairns A, Lockett M, Sebastian S, Haslam N. Probiotic VSL#3 prevents antibiotic-associated diarrhoea in a double-blind, randomized, placebo-controlled clinical trial. *J Hosp Infect* 2013;84:159-65.

Shan LS, Hou P, Wang ZJ, et al. Prevention and treatment of diarrhoea with *Saccharomyces boulardii* in children with acute lower respiratory tract infections. *Benef Microbes* 2013;4:329-34.

Shimbo I, Yamaguchi T, Odaka T, et al. Effect of *Clostridium butyricum* on fecal flora in *Helicobacter pylori* eradication therapy. *World J Gastroenterol* 2005;11:7520-4.

Siitonen S, Vapaatalo H, Salminen S, et al. Effect of *Lactobacillus GG* yoghurt in prevention of antibiotic associated diarrhoea. *Ann Med* 1990;22:57-9.



Sullivan A, Johansson A, Svenungsson B, Nord CE. Effect of Lactobacillus F19 on the emergence of antibiotic-resistant microorganisms in the intestinal microflora. *J Antimicrob Chemother* 2004;54:791-7.

Surawicz CM, Elmer GW, Speelman P, McFarland LV, Chinn J, van Belle G. Prevention of antibiotic-associated diarrhea by *Saccharomyces boulardii*: a prospective study. *Gastroenterology* 1989;96:981-8.

Thomas MR, Litin SC, Osmon DR, Corr AP, Weaver AL, Lohse CM. Lack of effect of Lactobacillus GG on antibiotic-associated diarrhea: a randomized, placebo-controlled trial. *Mayo Clin Proc* 2001;76:883-9.

Wenus C, Goll R, Loken EB, Biong AS, Halvorsen DS, Florholmen J. Prevention of antibiotic-associated diarrhoea by a fermented probiotic milk drink. *Eur J Clin Nutr* 2008;62:299-301.

Wong S, Jamous A, O'Driscoll J, et al. A Lactobacillus casei Shirota probiotic drink reduces antibiotic-associated diarrhoea in patients with spinal cord injuries: a randomised controlled trial. *Br J Nutr* 2014;111:672-8.

**Question:** Probiotics compared to antibiotics alone or antibiotics + placebo in patients receiving antibiotic therapy for any indication with the exception of *C. difficile* infection (2a)

**Bibliography:** Goldenberg 2017

| Certainty assessment |              |              |               |              |             |                      | № of patients |                                            | Effect            |                   | Certainty | Importance |
|----------------------|--------------|--------------|---------------|--------------|-------------|----------------------|---------------|--------------------------------------------|-------------------|-------------------|-----------|------------|
| № of studies         | Study design | Risk of bias | Inconsistency | Indirectness | Imprecision | Other considerations | Probiotics    | Antibiotics alone or antibiotics + placebo | Relative (95% CI) | Absolute (95% CI) |           |            |

**Incidence of *C. difficile*-associated Diarrhea**

|    |                   |                        |             |                      |             |      |                |                 |                                  |                                                          |             |          |
|----|-------------------|------------------------|-------------|----------------------|-------------|------|----------------|-----------------|----------------------------------|----------------------------------------------------------|-------------|----------|
| 31 | randomised trials | serious <sup>a,b</sup> | not serious | serious <sup>c</sup> | not serious | none | 70/4535 (1.5%) | 164/4147 (4.0%) | <b>RR 0.40</b><br>(0.30 to 0.52) | <b>24 fewer per 1,000</b><br>(from 28 fewer to 19 fewer) | ⊕⊕○○<br>LOW | CRITICAL |
|----|-------------------|------------------------|-------------|----------------------|-------------|------|----------------|-----------------|----------------------------------|----------------------------------------------------------|-------------|----------|

**Incidence of *C. difficile* Infection**

|    |                   |                        |             |             |                      |      |                |                |                                  |                                                         |             |          |
|----|-------------------|------------------------|-------------|-------------|----------------------|------|----------------|----------------|----------------------------------|---------------------------------------------------------|-------------|----------|
| 15 | randomised trials | serious <sup>a,b</sup> | not serious | not serious | serious <sup>d</sup> | none | 98/633 (15.5%) | 99/581 (17.0%) | <b>RR 0.86</b><br>(0.67 to 1.10) | <b>24 fewer per 1,000</b><br>(from 56 fewer to 17 more) | ⊕⊕○○<br>LOW | CRITICAL |
|----|-------------------|------------------------|-------------|-------------|----------------------|------|----------------|----------------|----------------------------------|---------------------------------------------------------|-------------|----------|

**Adverse Events**

|    |                   |                        |                      |             |             |      |                  |                  |                                  |                                                         |             |          |
|----|-------------------|------------------------|----------------------|-------------|-------------|------|------------------|------------------|----------------------------------|---------------------------------------------------------|-------------|----------|
| 32 | randomised trials | serious <sup>a,b</sup> | serious <sup>e</sup> | not serious | not serious | none | 620/4329 (14.3%) | 677/3976 (17.0%) | <b>RR 0.83</b><br>(0.71 to 0.97) | <b>29 fewer per 1,000</b><br>(from 49 fewer to 5 fewer) | ⊕⊕○○<br>LOW | CRITICAL |
|----|-------------------|------------------------|----------------------|-------------|-------------|------|------------------|------------------|----------------------------------|---------------------------------------------------------|-------------|----------|

**Incidence of Antibiotic-associated Diarrhea**

| Certainty assessment |                   |                        |                      |              |             |                      | № of patients    |                                            | Effect                           |                                                          | Certainty   | Importance |
|----------------------|-------------------|------------------------|----------------------|--------------|-------------|----------------------|------------------|--------------------------------------------|----------------------------------|----------------------------------------------------------|-------------|------------|
| № of studies         | Study design      | Risk of bias           | Inconsistency        | Indirectness | Imprecision | Other considerations | Probiotics       | Antibiotics alone or antibiotics + placebo | Relative (95% CI)                | Absolute (95% CI)                                        |             |            |
| 33                   | randomised trials | serious <sup>a,b</sup> | serious <sup>f</sup> | not serious  | not serious | none                 | 565/4618 (12.2%) | 771/4252 (18.1%)                           | <b>RR 0.58</b><br>(0.48 to 0.70) | <b>76 fewer per 1,000</b><br>(from 94 fewer to 54 fewer) | ⊕⊕○○<br>LOW | CRITICAL   |

#### Incidence of Antibiotic-associated Diarrhea (Adults)

|    |                   |                          |                      |                      |             |                   |                  |                  |                                  |                                                          |             |           |
|----|-------------------|--------------------------|----------------------|----------------------|-------------|-------------------|------------------|------------------|----------------------------------|----------------------------------------------------------|-------------|-----------|
| 23 | randomised trials | not serious <sup>g</sup> | serious <sup>h</sup> | serious <sup>i</sup> | not serious | none <sup>j</sup> | 476/3694 (12.9%) | 583/3342 (17.4%) | <b>RR 0.62</b><br>(0.51 to 0.76) | <b>66 fewer per 1,000</b><br>(from 85 fewer to 42 fewer) | ⊕⊕○○<br>LOW | IMPORTANT |
|----|-------------------|--------------------------|----------------------|----------------------|-------------|-------------------|------------------|------------------|----------------------------------|----------------------------------------------------------|-------------|-----------|

#### Incidence of Antibiotic-associated Diarrhea (Children)

|   |                   |                          |             |                      |             |                                                  |               |                 |                                  |                                                             |             |           |
|---|-------------------|--------------------------|-------------|----------------------|-------------|--------------------------------------------------|---------------|-----------------|----------------------------------|-------------------------------------------------------------|-------------|-----------|
| 6 | randomised trials | not serious <sup>k</sup> | not serious | serious <sup>l</sup> | not serious | publication bias strongly suspected <sup>m</sup> | 56/566 (9.9%) | 156/575 (27.1%) | <b>RR 0.38</b><br>(0.29 to 0.49) | <b>168 fewer per 1,000</b><br>(from 193 fewer to 138 fewer) | ⊕⊕○○<br>LOW | IMPORTANT |
|---|-------------------|--------------------------|-------------|----------------------|-------------|--------------------------------------------------|---------------|-----------------|----------------------------------|-------------------------------------------------------------|-------------|-----------|

CI: Confidence interval; RR: Risk ratio

## Explanations

a. 21/31 of the studies included had high or uncertain risk of bias.

b. rating down once for risk of bias covered multiple minor concerns, including publication bias.

- c. overall effect estimate was heavily influenced by 5 studies with a baseline risk of CDAD > 15%, studies with a low baseline risk of CDAD did not demonstrate significant risk reduction
- d. The 95% CI includes the potential for both benefit and harm.
- e. heterogeneity suggested based on an I<sup>2</sup> of 49%. Goldenberg 2017 authors suggest that this heterogeneity may be explained by a subgroup effect found between the probiotic species.
- f. heterogeneity suggested based on an I<sup>2</sup> of 61%. Goldenberg 2017 authors suggest that this heterogeneity may be explained by a subgroup effect from the inclusion of both pediatric vs adult populations.
- g. 12/23 studies with unclear or high risk of bias.
- h. statistically significant heterogeneity noted between studies (I<sup>2</sup> = 59%), may be explained by risk of bias.
- i. adults only included and may not be generalizable to the entire population.
- j. visual inspection of the funnel plot and statistical assessment via Harbord linear regression test were suggestive of small study effects (e.g. publication bias) (P = 0.02).
- k. 2/6 studies with unclear or high risk of bias reported.
- l. children only included and may not be generalizable to the entire population.
- m. with n=6 Harbord's linear regression test is underpowered to detect a significant interaction, however visual inspection of the funnel plot is suspicious for publication bias. Also, due to the review's inclusion criteria specific to CDAD not AAD we worry about the possibility of publication bias here.

Forest plots

Comparison: Probiotics versus control

Outcome: Incidence CDAD: complete case

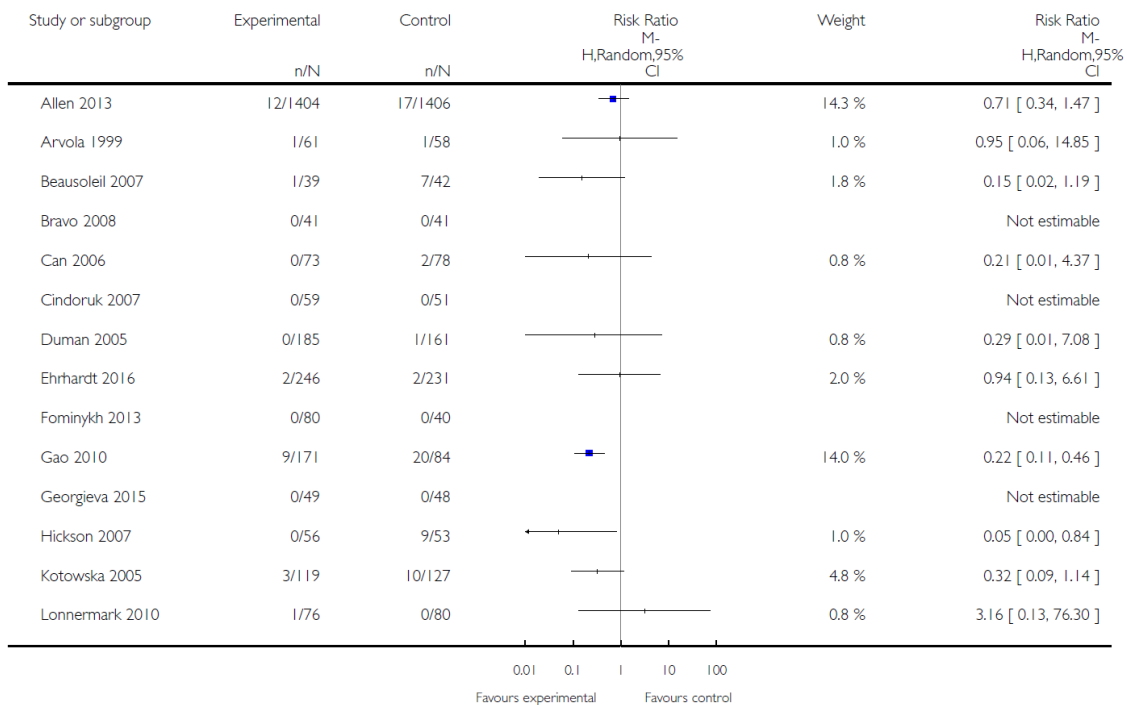

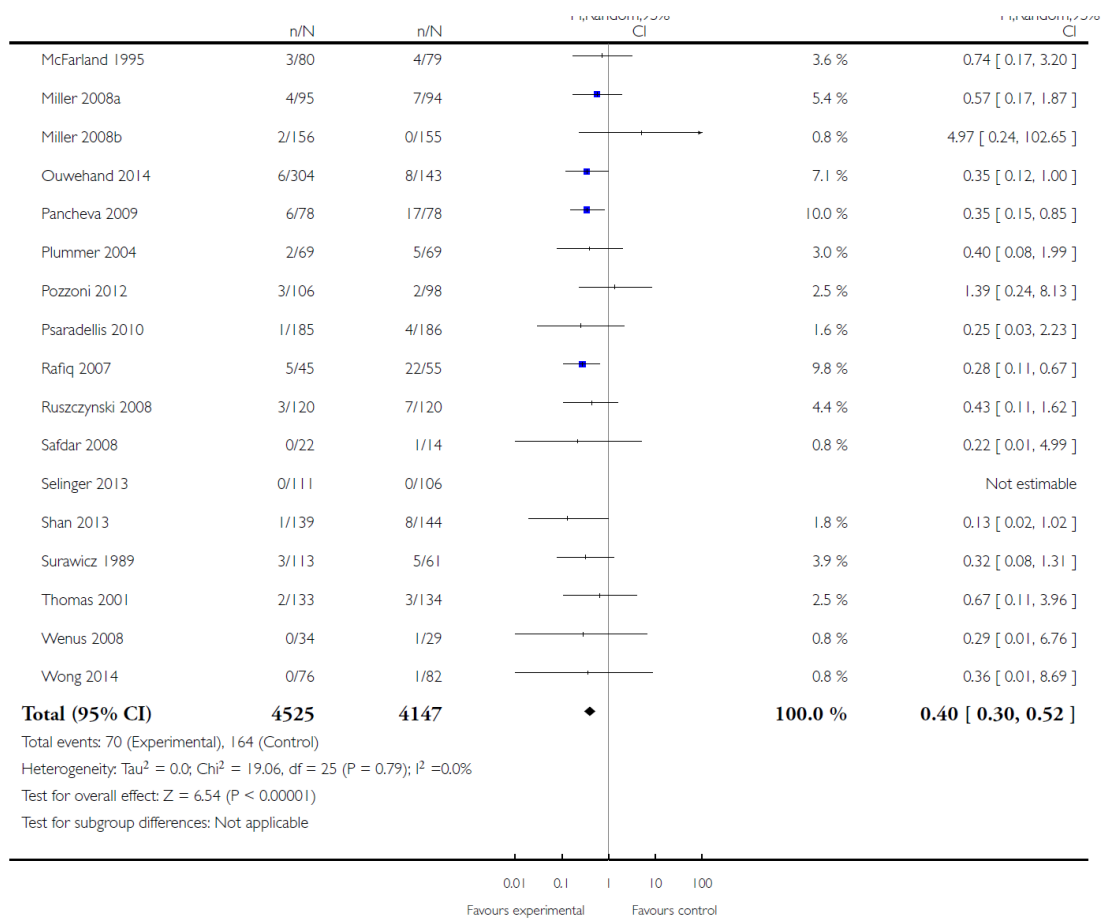

Comparison: 1 Probiotics versus control

Outcome: 18 Incidence of infection: complete case

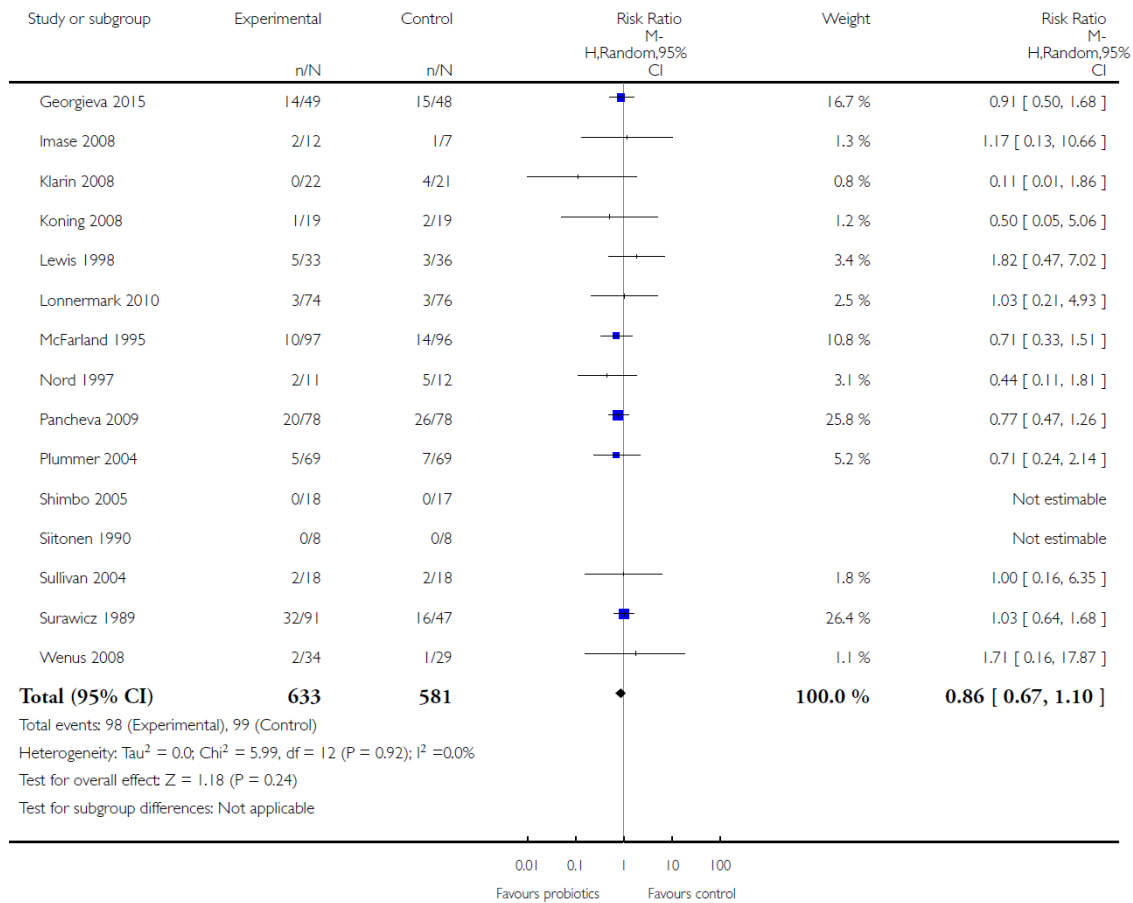

Comparison: 1 Probiotics versus control

Outcome: 24 Adverse Events: complete case

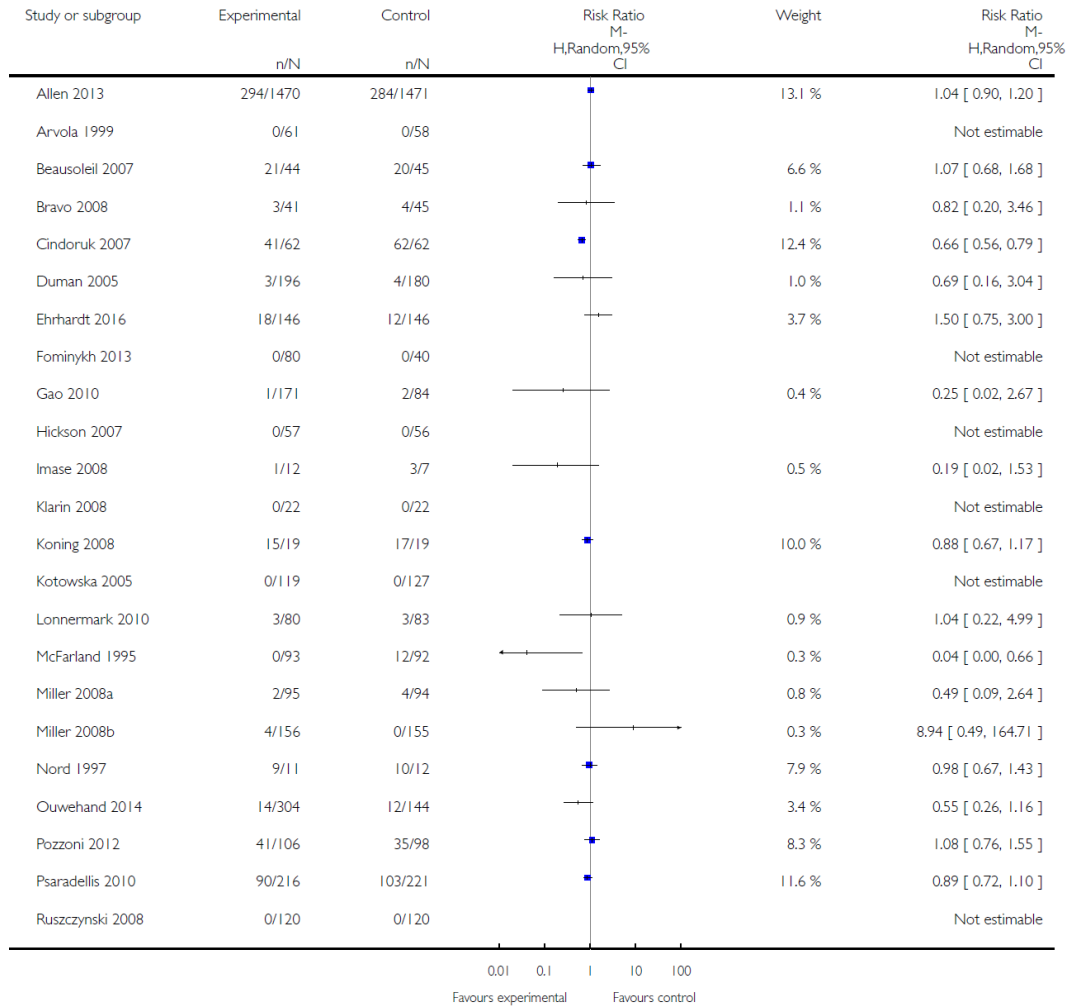



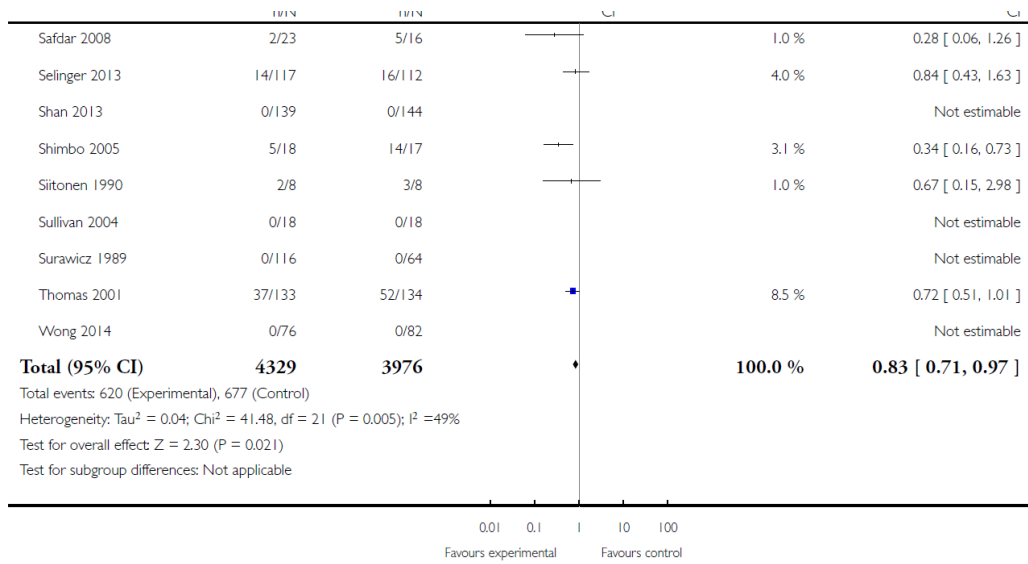

Comparison: I Probiotics versus control

Outcome: 35 Incidence AAD: complete case

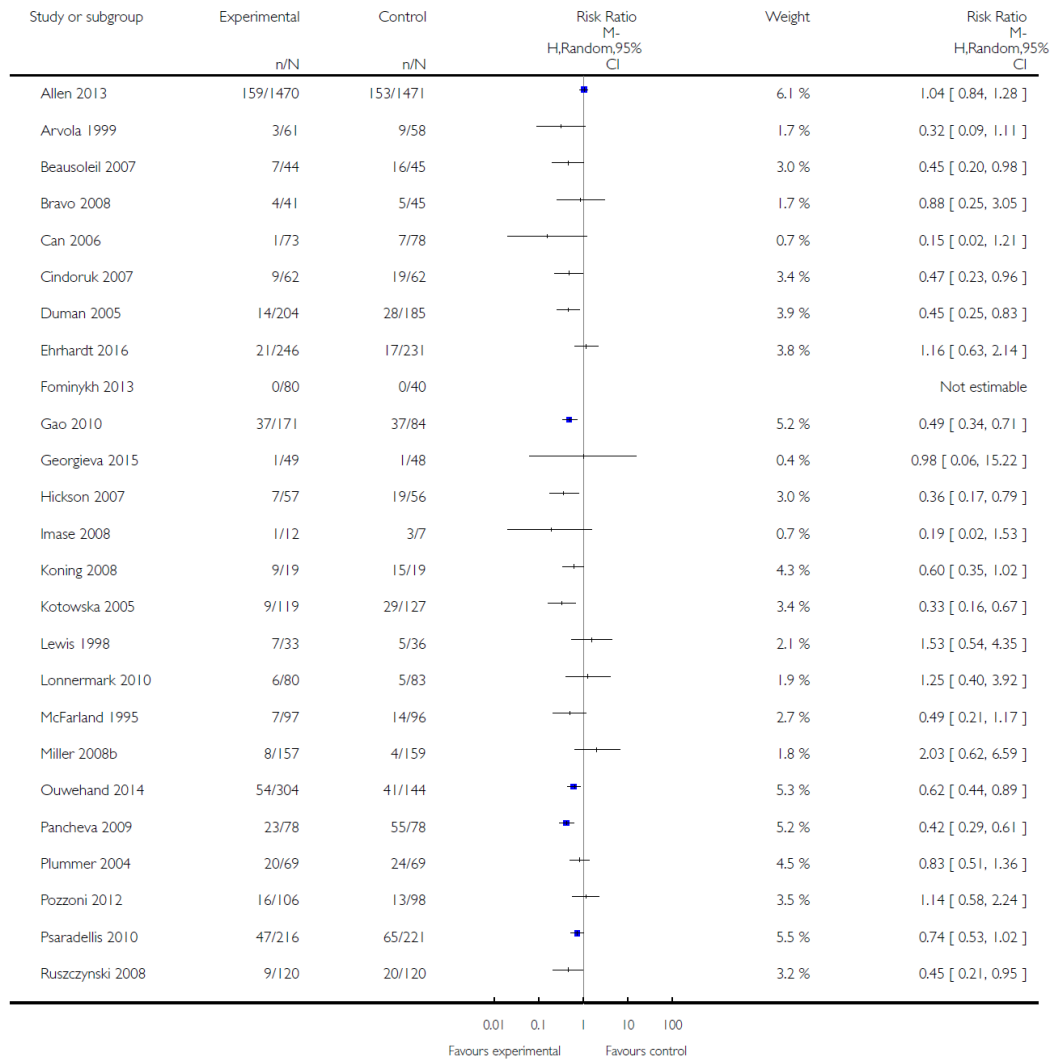

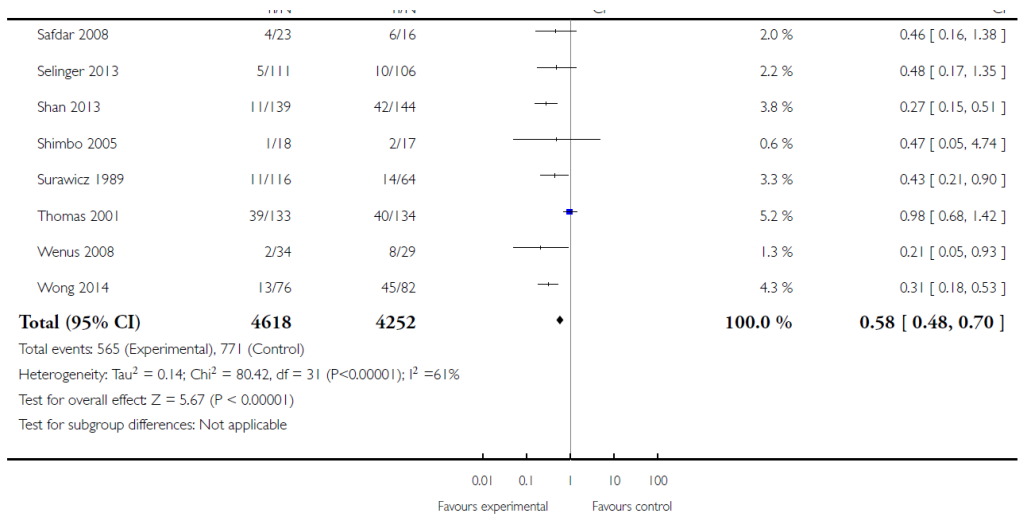

Comparison: 1 Probiotics versus control

Outcome: 45 Incidence AAD: Adult versus child

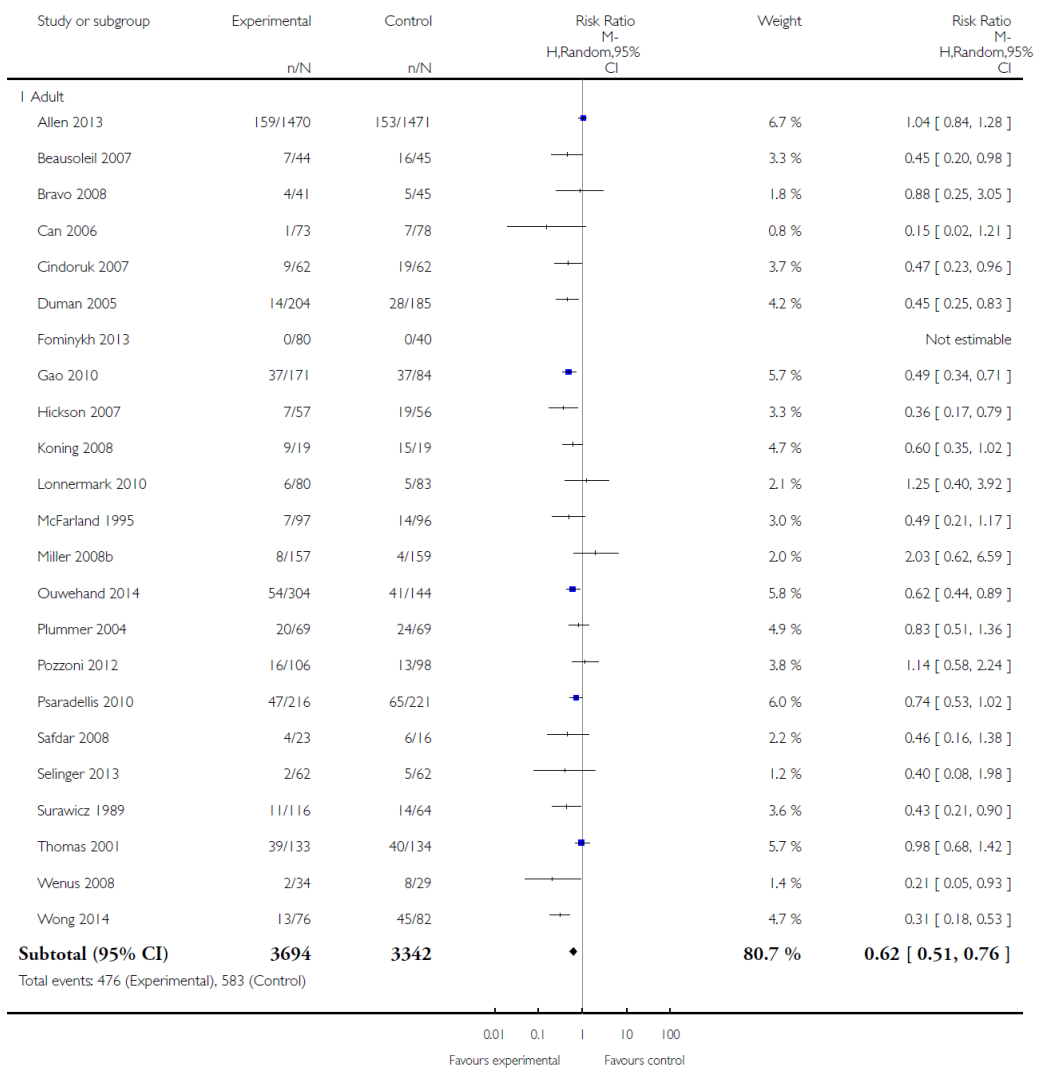

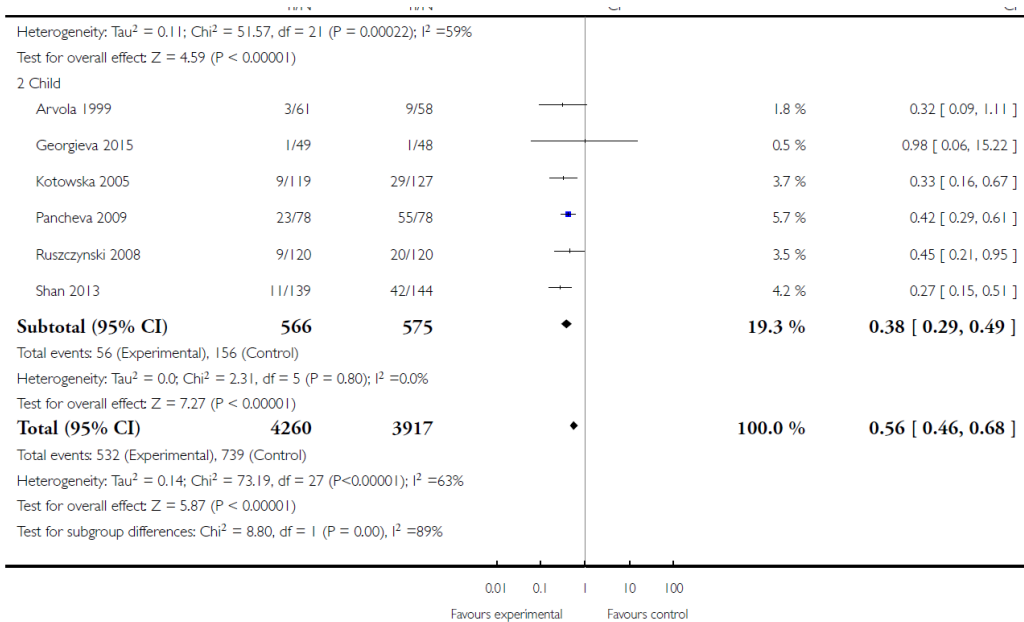

## Outcomes stratified by species:

### C. difficile-associated diarrhea

#### Analysis 1.8. Comparison 1 Probiotics versus control, Outcome 8 Incidence CDAD: Subgroup: Species: all.

Review: Probiotics for the prevention of Clostridium difficile-associated diarrhea in adults and children

Comparison: 1 Probiotics versus control

Outcome: 8 Incidence CDAD: Subgroup: Species: all

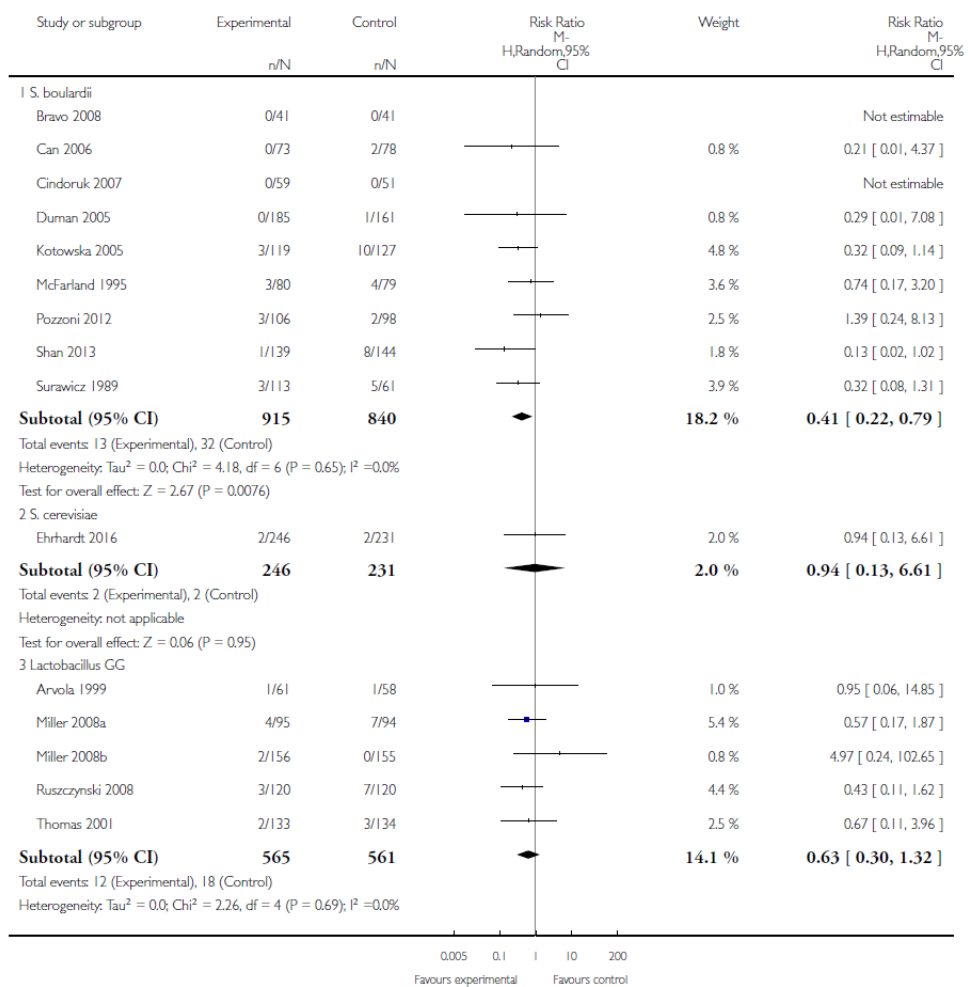

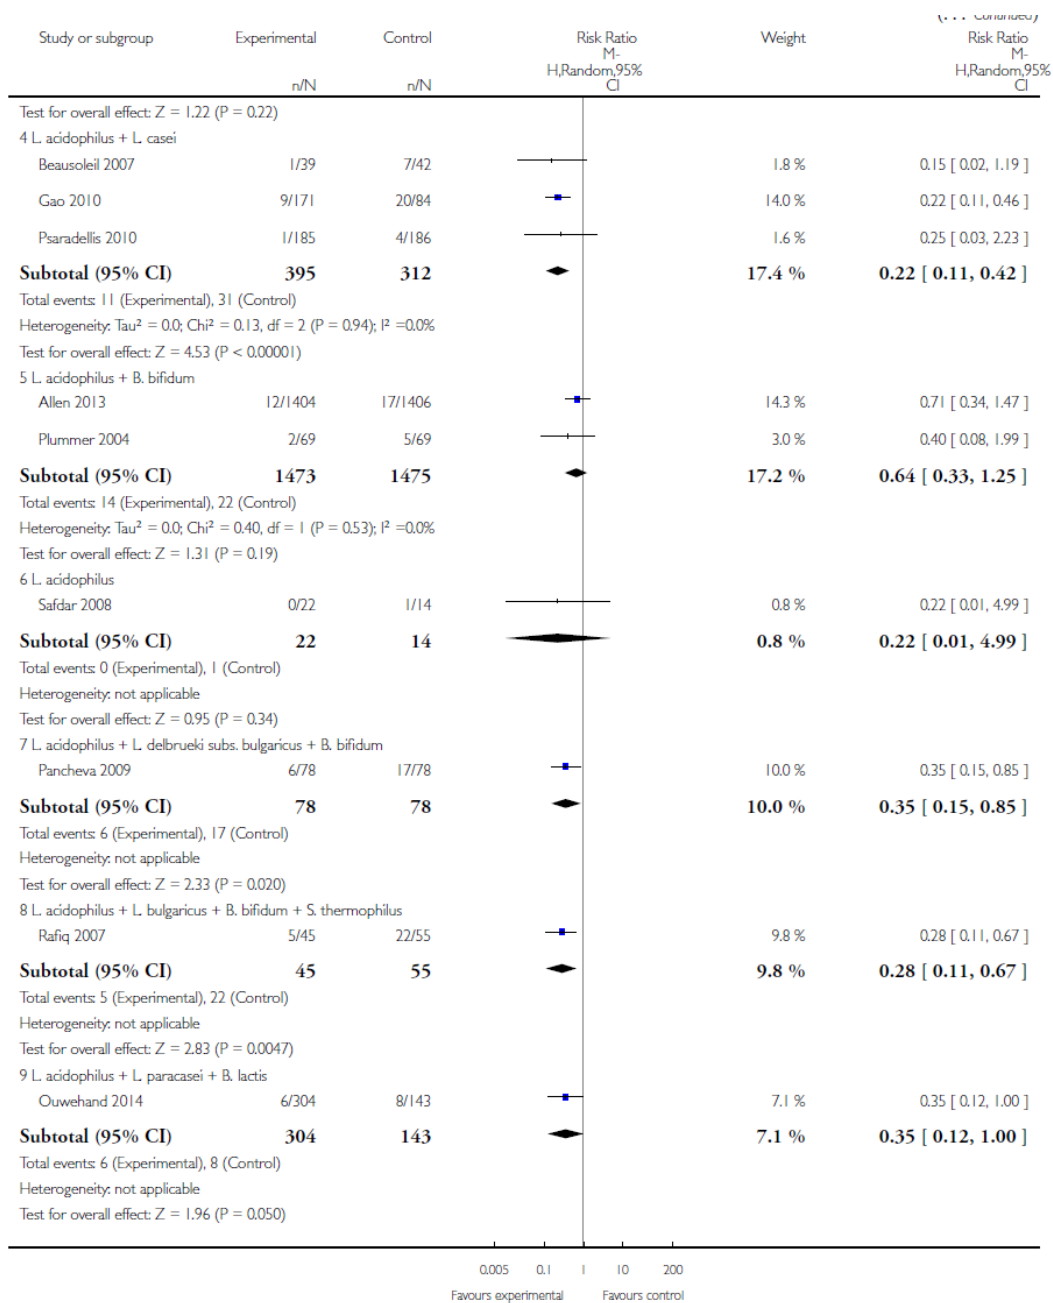

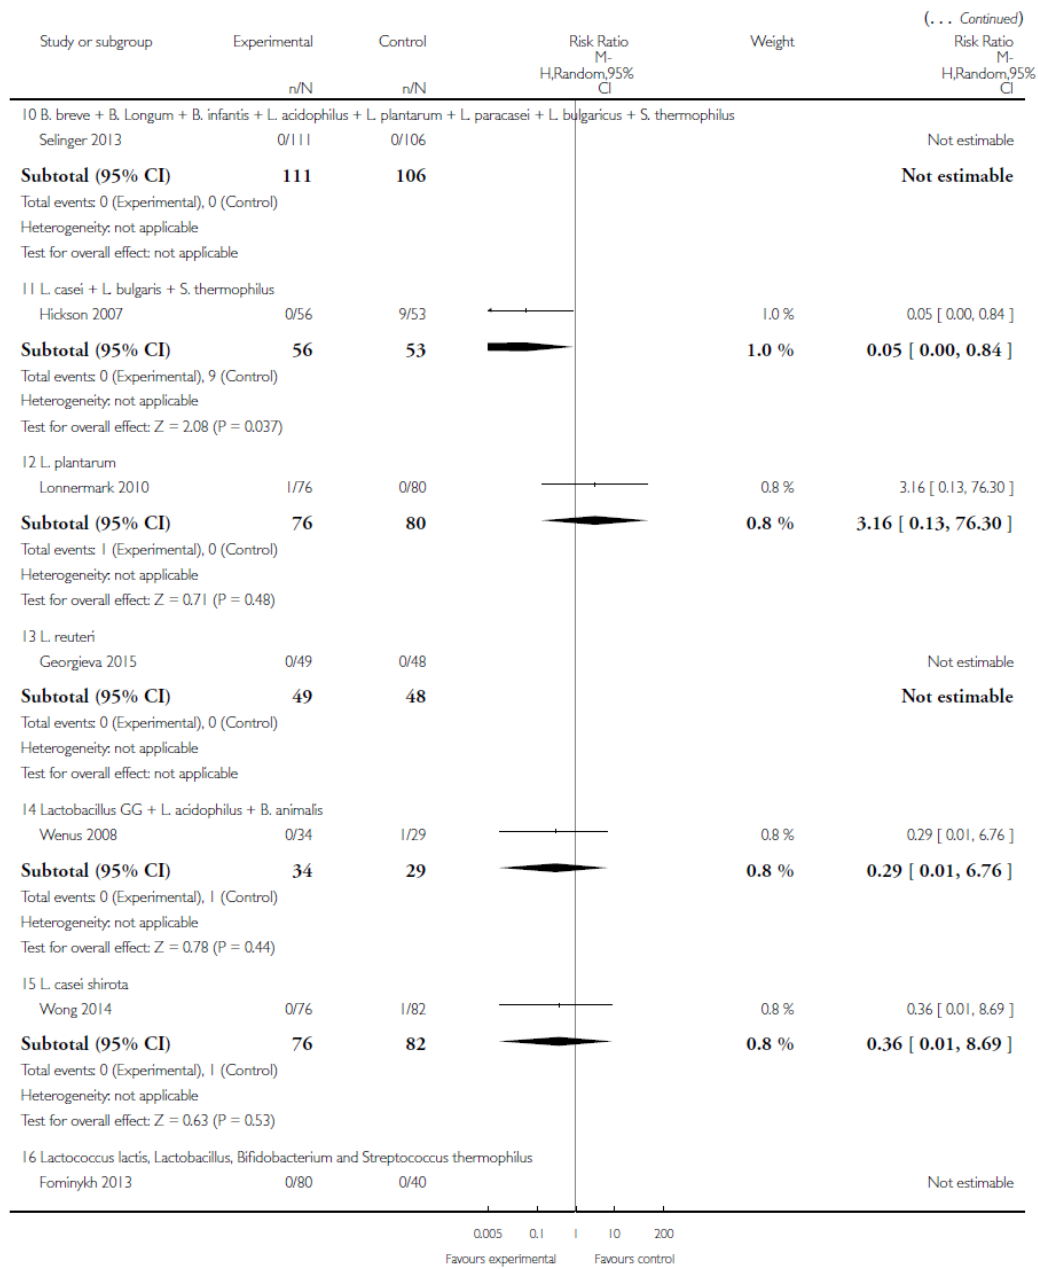

(Continued . . .)



(. . . Continued)

| Study or subgroup                                                                                          | Experimental<br>n/N | Control<br>n/N | Risk Ratio<br>M-<br>H,Random,95%<br>CI | Weight         | Risk Ratio<br>M-<br>H,Random,95%<br>CI |
|------------------------------------------------------------------------------------------------------------|---------------------|----------------|----------------------------------------|----------------|----------------------------------------|
| <b>Subtotal (95% CI)</b>                                                                                   | <b>80</b>           | <b>40</b>      |                                        |                | <b>Not estimable</b>                   |
| Total events: 0 (Experimental), 0 (Control)                                                                |                     |                |                                        |                |                                        |
| Heterogeneity: not applicable                                                                              |                     |                |                                        |                |                                        |
| Test for overall effect: not applicable                                                                    |                     |                |                                        |                |                                        |
| <b>Total (95% CI)</b>                                                                                      | <b>4525</b>         | <b>4147</b>    | <b>◆</b>                               | <b>100.0 %</b> | <b>0.40 [ 0.30, 0.52 ]</b>             |
| Total events: 70 (Experimental), 164 (Control)                                                             |                     |                |                                        |                |                                        |
| Heterogeneity: Tau <sup>2</sup> = 0.0; Chi <sup>2</sup> = 19.06, df = 25 (P = 0.79); I <sup>2</sup> = 0.0% |                     |                |                                        |                |                                        |
| Test for overall effect: Z = 6.54 (P < 0.00001)                                                            |                     |                |                                        |                |                                        |
| Test for subgroup differences: Chi <sup>2</sup> = 12.13, df = 12 (P = 0.43), I <sup>2</sup> = 1%           |                     |                |                                        |                |                                        |

0.005 0.1 1 10 200  
Favours experimental Favours control

## Incidence of infection

### Analysis 1.21. Comparison 1 Probiotics versus control, Outcome 21 Incidence of infection: Species: all.

Review: Probiotics for the prevention of Clostridium difficile-associated diarrhea in adults and children

Comparison: 1 Probiotics versus control

Outcome: 21 Incidence of infection: Species: all

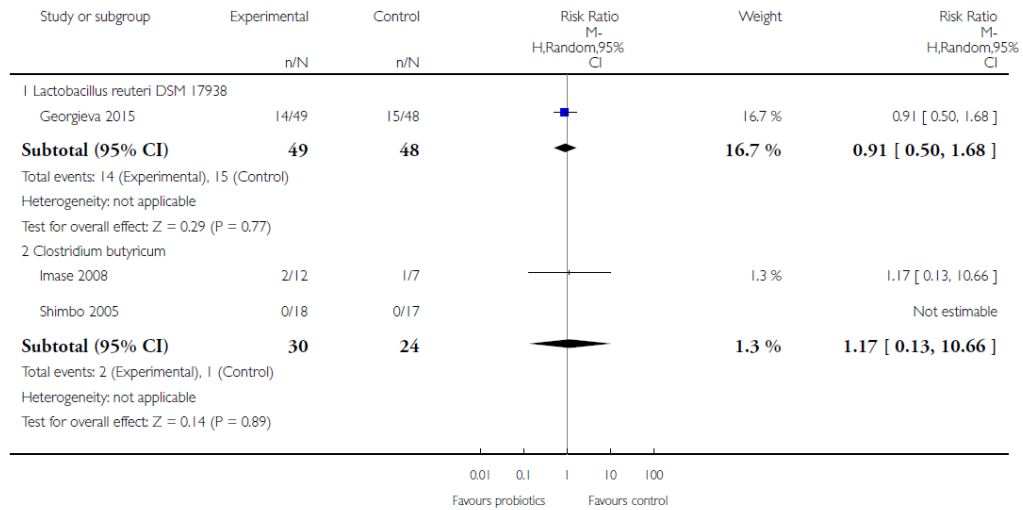

(Continued ...)

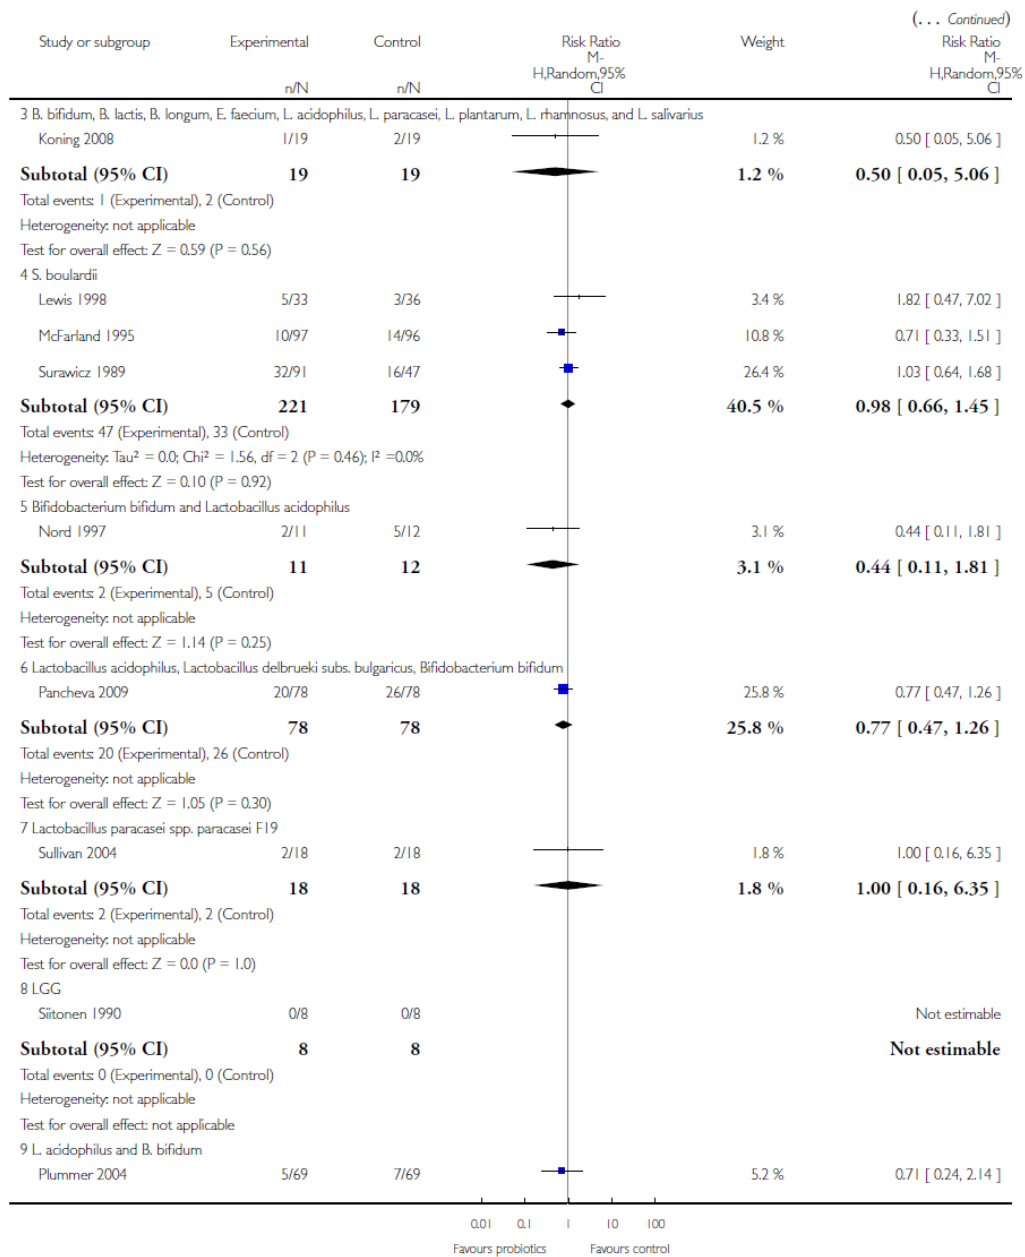

(Continued . . .)

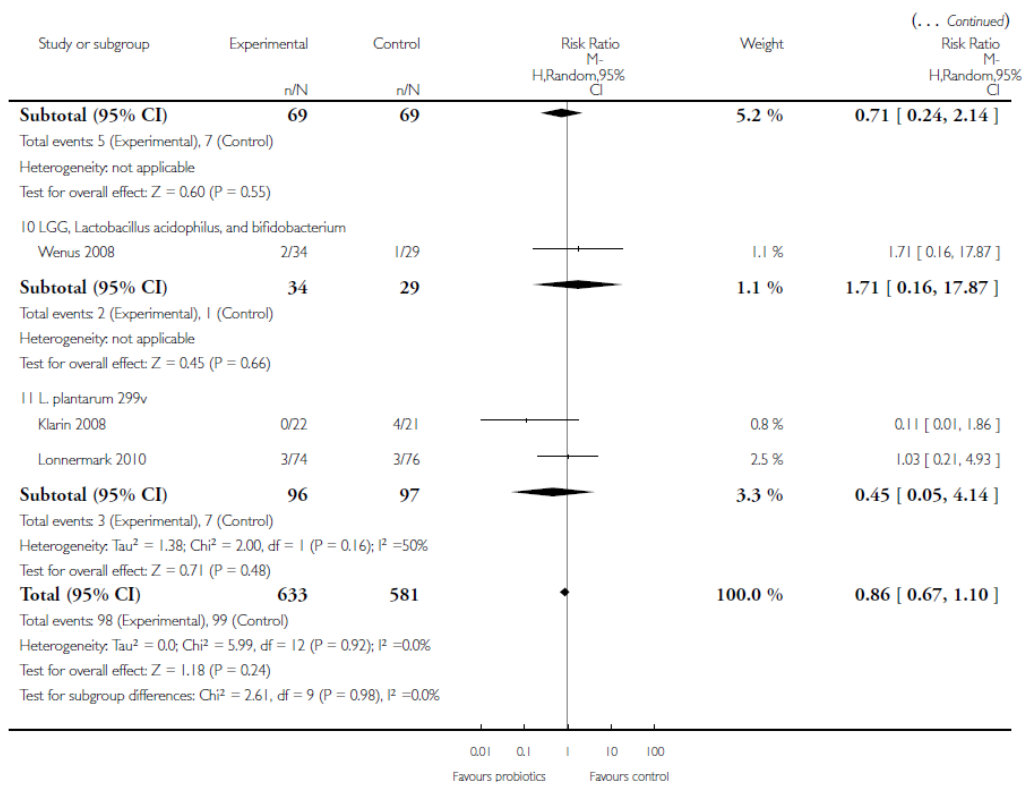

## Adverse events

### Analysis 1.30. Comparison 1 Probiotics versus control, Outcome 30 Adverse Events: Species: all.

Review: Probiotics for the prevention of Clostridium difficile-associated diarrhea in adults and children

Comparison: 1 Probiotics versus control

Outcome: 30 Adverse Events: Species: all

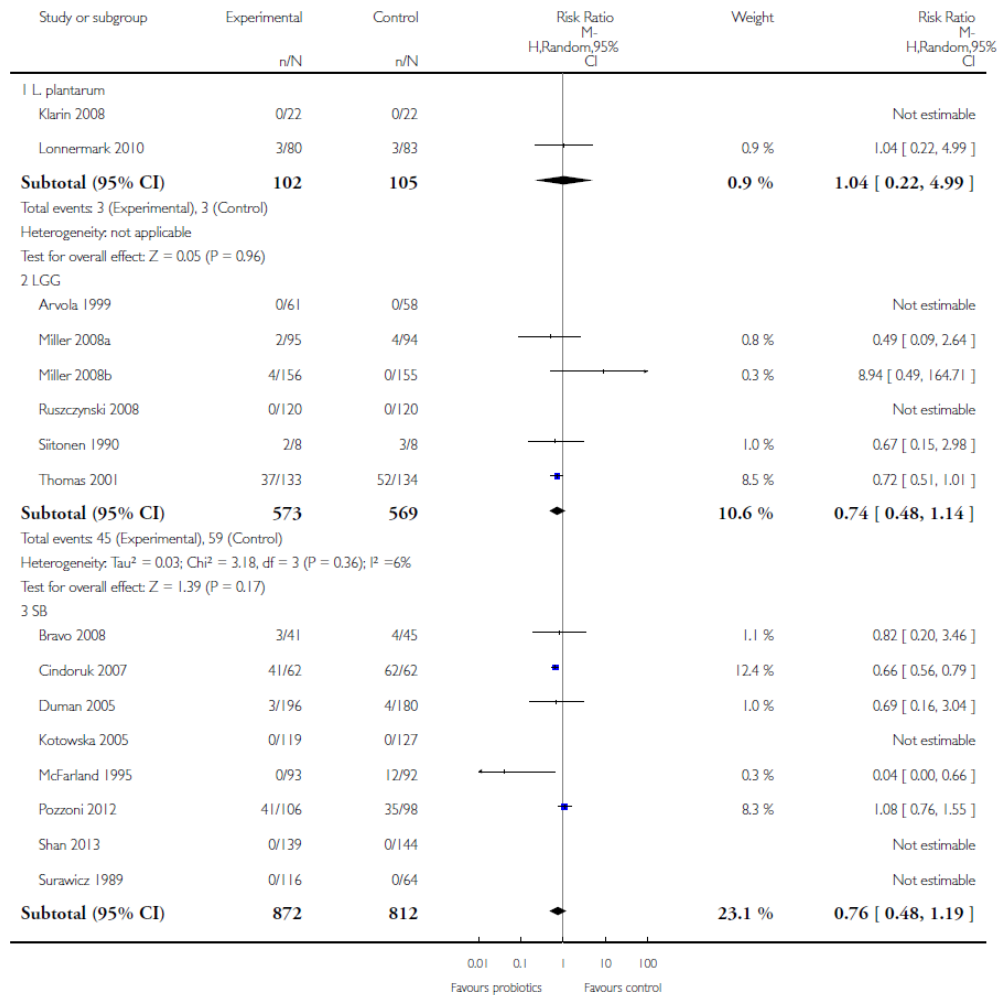

(Continued ...)

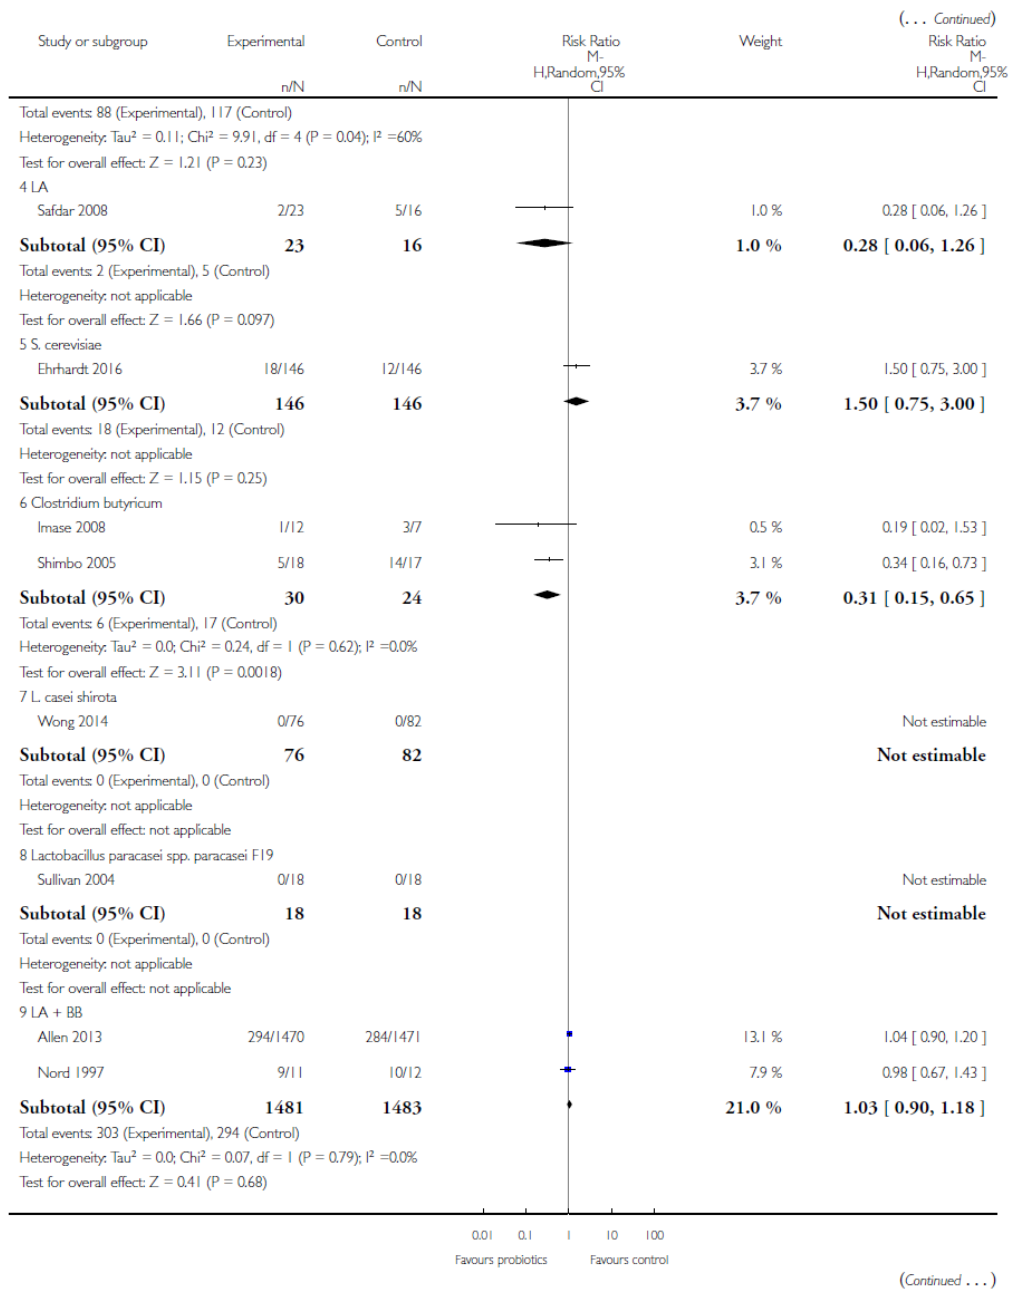

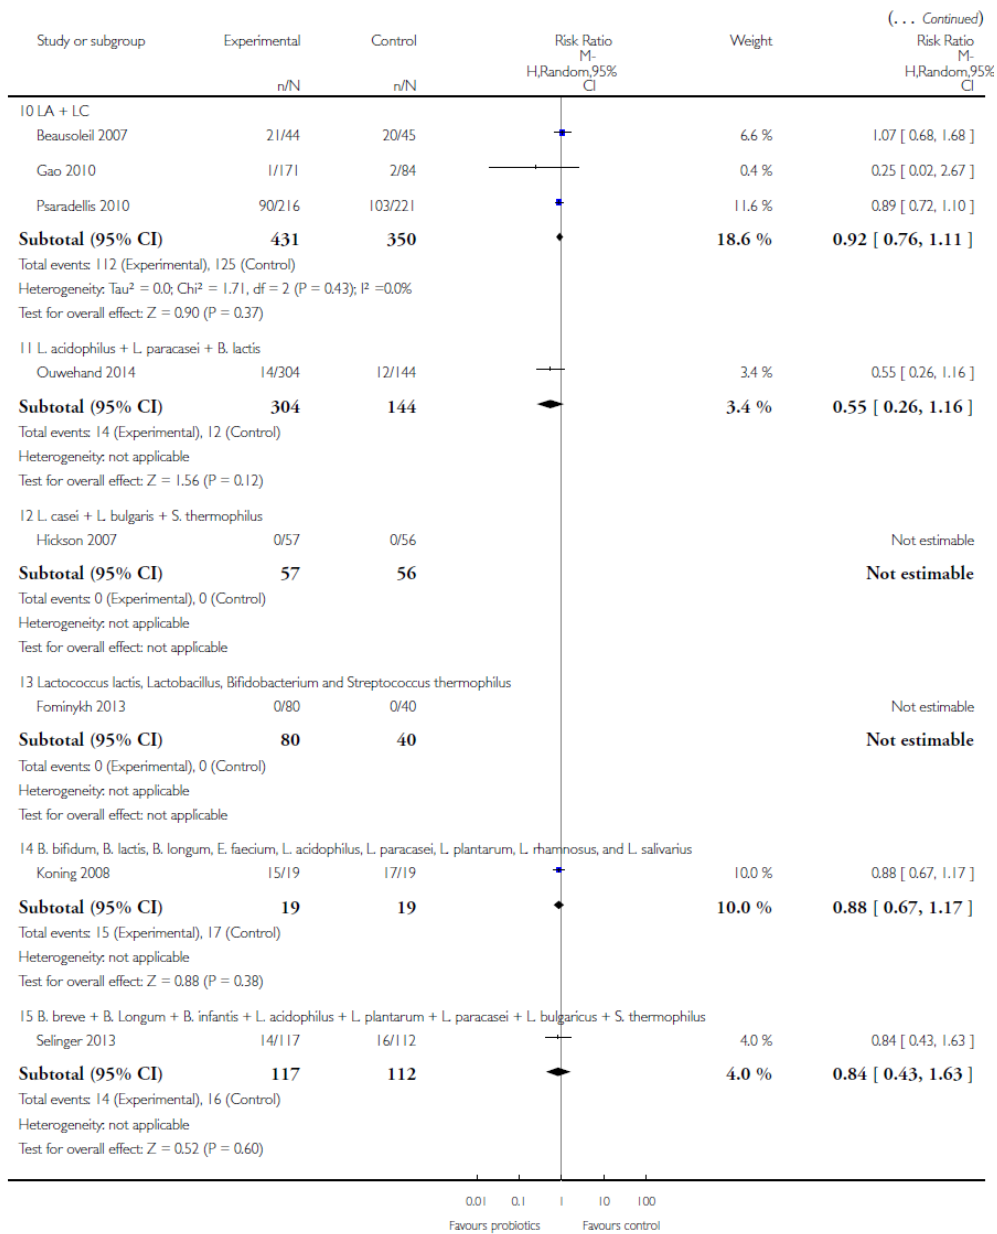

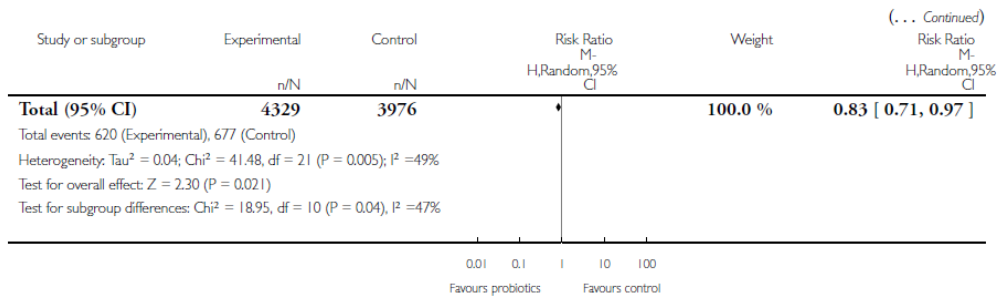



# Incidence of antibiotic-associated diarrhea

## Analysis 1.42. Comparison 1 Probiotics versus control, Outcome 42 Incidence AAD: Species: all.

Review: Probiotics for the prevention of Clostridium difficile-associated diarrhea in adults and children

Comparison: 1 Probiotics versus control

Outcome: 42 Incidence AAD: Species: all

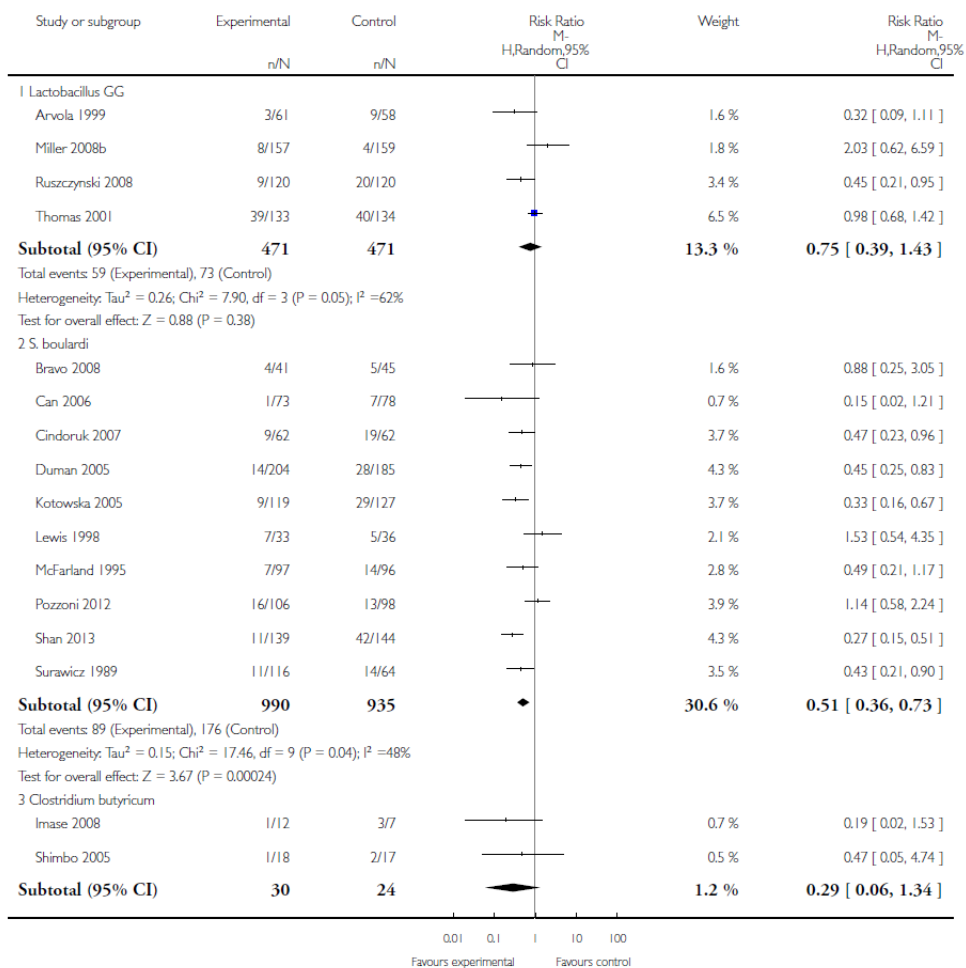

(Continued ...)

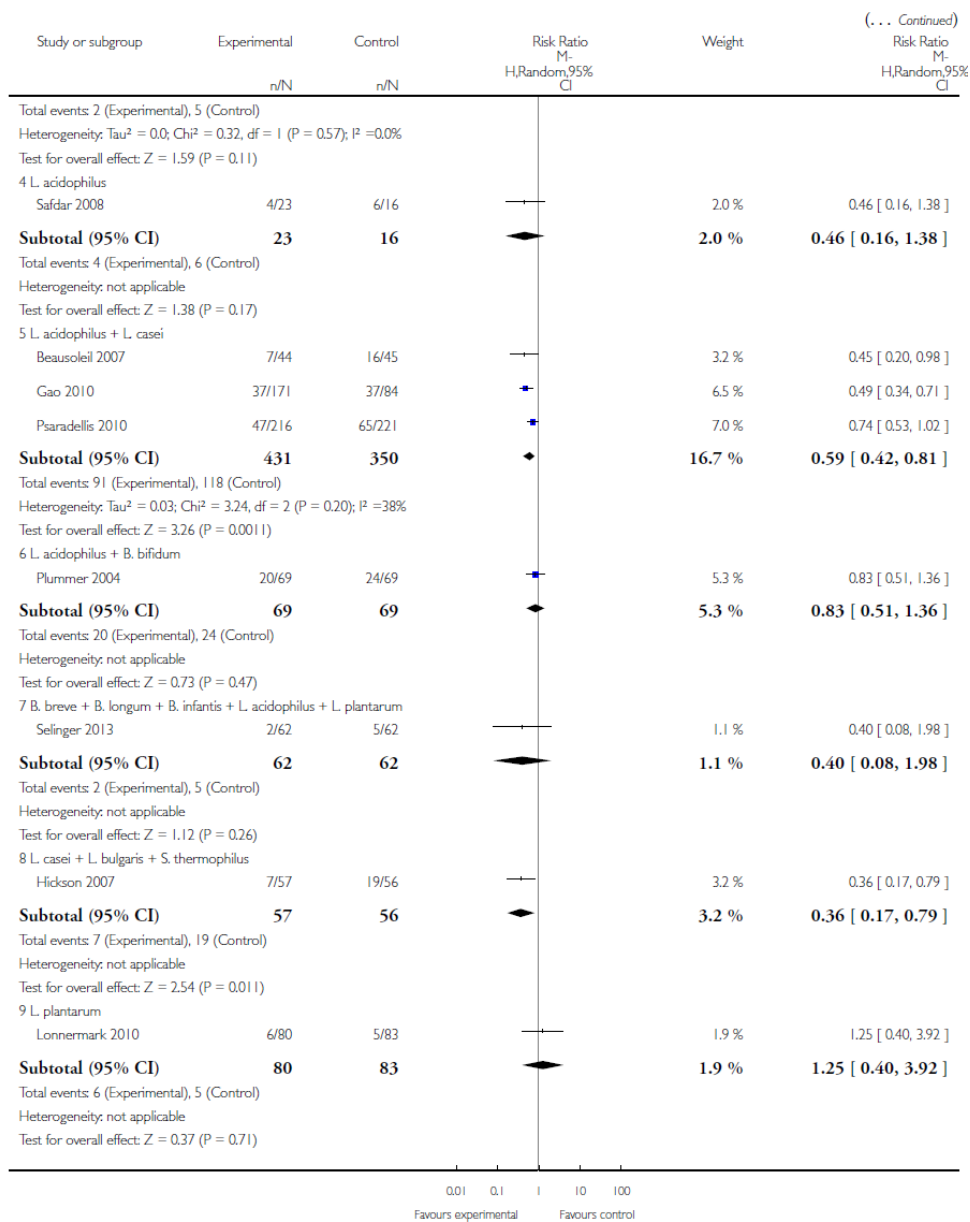

(Continued . . .)

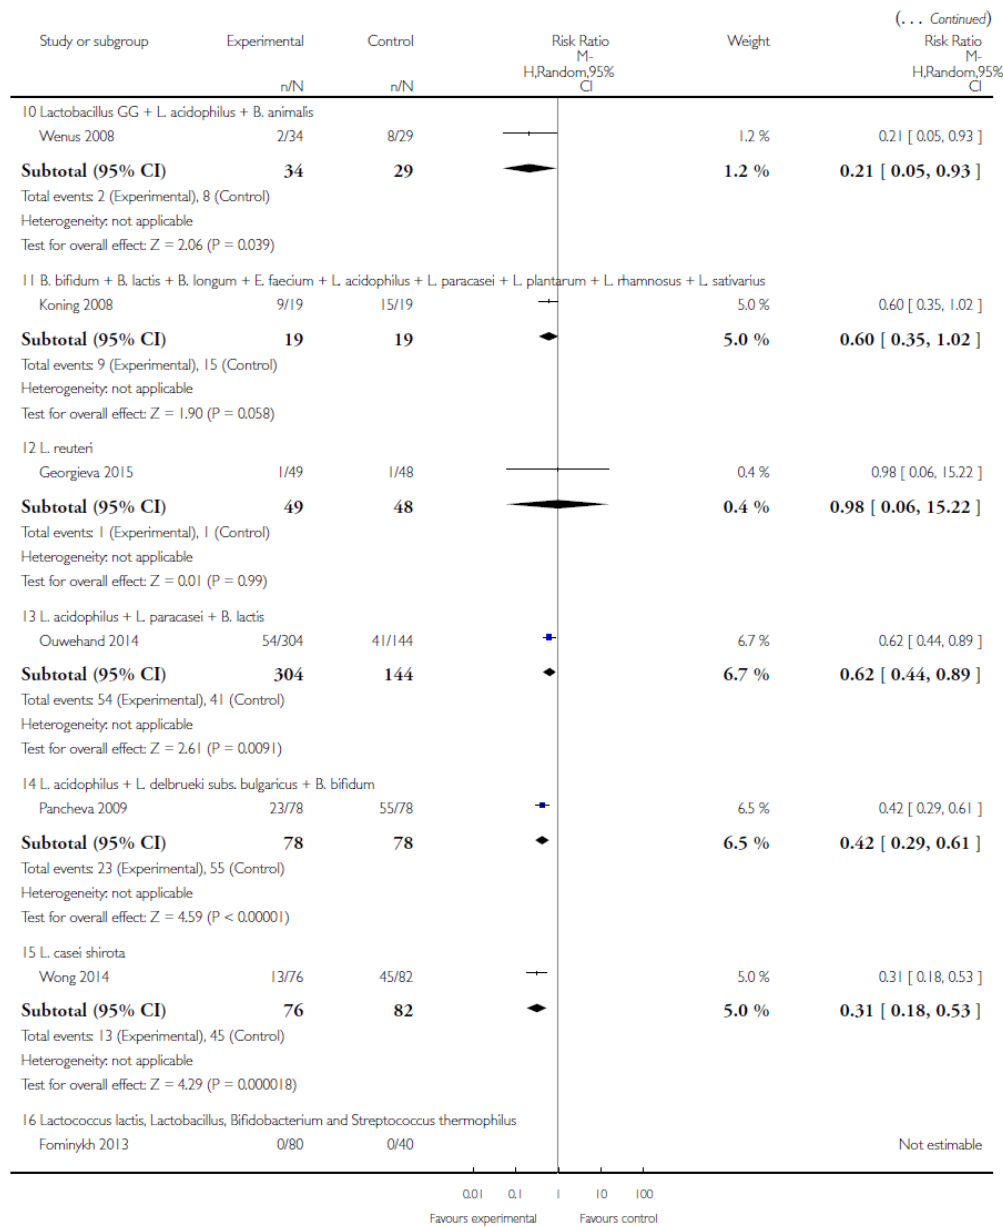

(Continued . . .)

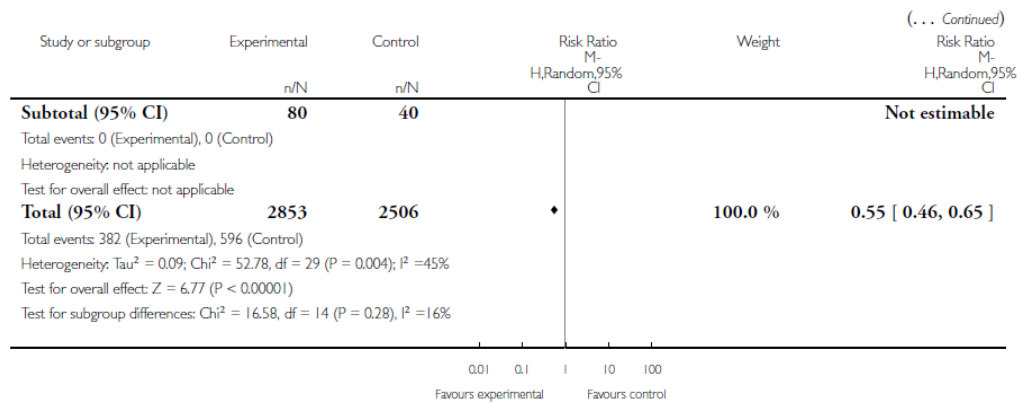

## Appendix 3: Should probiotics be used in patients with Crohn's disease?

### Bibliography

Included from: Butterworth AD, Thomas AG, Akobeng AK. Probiotics for induction of remission in Crohn's disease. Cochrane Database Syst Rev 2008:CD006634.

Schultz M, Timmer A, Herfarth HH, Sartor RB, Vanderhoof JA, Rath HC. Lactobacillus GG in inducing and maintaining remission of Crohn's disease. BMC Gastroenterol 2004;4:5.

Included from: Rolfe VE, Fortun PJ, Hawkey CJ, Bath-Hextall F. Probiotics for maintenance of remission in Crohn's disease. Cochrane Database Syst Rev 2006:CD004826.

Schultz M, Timmer A, Herfarth HH, Sartor RB, Vanderhoof JA, Rath HC. Lactobacillus GG in inducing and maintaining remission of Crohn's disease. BMC Gastroenterol 2004;4:5.

Bousvaros A, Guandalini S, Baldassano RN, et al. A randomized, double-blind trial of Lactobacillus GG versus placebo in addition to standard maintenance therapy for children with Crohn's disease. Inflamm Bowel Dis 2005;11:833-9.

Campieri M, Rizzello F, Venturi A, et al. Combination of antibiotic and probiotic treatment is efficacious in prophylaxis of post-operative recurrence of Crohn's disease: a randomized controlled study vs mesalamine. Gastroenterology 2000;118:A781.

Guslandi M, Mezzi G, Sorghi M, Testoni PA. Saccharomyces boulardii in maintenance treatment of Crohn's disease. Dig Dis Sci 2000;45:1462-4.

Malchow HA. Crohn's disease and Escherichia coli. A new approach in therapy to maintain remission of colonic Crohn's disease? J Clin Gastroenterol 1997;25:653-8.

Prantera C, Scribano ML, Falasco G, Andreoli A, Luzi C. Ineffectiveness of probiotics in preventing recurrence after curative resection for Crohn's disease: a randomised controlled trial with Lactobacillus GG. Gut 2002;51:405-9.

Zocco MA, Zileri Dal Verme L, Armuzzi A, et al. Comparison of Lactobacillus GG and mesalazine in maintaining remission of ulcerative colitis and Crohn's disease. Gastroenterology 2003;124:A201.

Marteau P, Lemann M, Seksik P, et al. Ineffectiveness of Lactobacillus johnsonii LA1 for prophylaxis of postoperative recurrence in Crohn's disease: a randomised, double blind, placebo controlled GETAID trial. Gut 2006;55:842-7.

Van Gossum A, Dewit O, Louis E, et al. Multicenter randomized-controlled clinical trial of probiotics (*Lactobacillus johnsonii*, LA1) on early endoscopic recurrence of Crohn's disease after ileo-caecal resection. *Inflamm Bowel Dis* 2007;13:135-42.

Bourreille A, Cadiot G, Le Dreau G, et al. *Saccharomyces boulardii* does not prevent relapse of Crohn's disease. *Clin Gastroenterol Hepatol* 2013;11:982-7.

Fedorak RN, Feagan BG, Hotte N, et al. The probiotic VSL#3 has anti-inflammatory effects and could reduce endoscopic recurrence after surgery for Crohn's disease. *Clin Gastroenterol Hepatol* 2015;13:928-35 e2.

Question: *Lactobacillus rhamnosus* ATCC 53103 compared to placebo or standard of care or placebo + standard of care in patients with Crohn's disease (3a)

Bibliography: Prantera 2002, Schultz 2004

| Certainty assessment |              |              |               |              |             |                      | № of patients                  |                                                         | Effect            |                   | Certainty | Importance |
|----------------------|--------------|--------------|---------------|--------------|-------------|----------------------|--------------------------------|---------------------------------------------------------|-------------------|-------------------|-----------|------------|
| № of studies         | Study design | Risk of bias | Inconsistency | Indirectness | Imprecision | Other considerations | <i>L. rhamnosus</i> ATCC 53103 | Placebo or standard of care or placebo+standard of care | Relative (95% CI) | Absolute (95% CI) |           |            |

Clinical Remission (follow up: 12 weeks; assessed with: defined as CDAI<150)

|   |                   |                        |             |                        |                           |      |             |             |                                   |                                                           |                  |          |
|---|-------------------|------------------------|-------------|------------------------|---------------------------|------|-------------|-------------|-----------------------------------|-----------------------------------------------------------|------------------|----------|
| 1 | randomised trials | serious <sup>a,b</sup> | not serious | serious <sup>c,d</sup> | very serious <sup>e</sup> | none | 4/5 (80.0%) | 5/6 (83.3%) | <b>OR 0.80</b><br>(0.04 to 17.20) | <b>33 fewer per 1,000</b><br>(from 667 fewer to 155 more) | ⊕○○○<br>VERY LOW | CRITICAL |
|---|-------------------|------------------------|-------------|------------------------|---------------------------|------|-------------|-------------|-----------------------------------|-----------------------------------------------------------|------------------|----------|

Relapse (follow up: 6 months; assessed with: >100 points in CDAI score)

|   |                   |                      |             |                      |                      |      |             |             |                                  |                                                              |                  |          |
|---|-------------------|----------------------|-------------|----------------------|----------------------|------|-------------|-------------|----------------------------------|--------------------------------------------------------------|------------------|----------|
| 1 | randomised trials | serious <sup>a</sup> | not serious | serious <sup>d</sup> | serious <sup>e</sup> | none | 2/4 (50.0%) | 3/5 (60.0%) | <b>RR 0.83</b><br>(0.25 to 2.80) | <b>102 fewer per 1,000</b><br>(from 450 fewer to 1,000 more) | ⊕○○○<br>VERY LOW | CRITICAL |
|---|-------------------|----------------------|-------------|----------------------|----------------------|------|-------------|-------------|----------------------------------|--------------------------------------------------------------|------------------|----------|

Relapse (follow up: 12 months; assessed with: endoscopy)

|   |                   |                      |             |             |                      |      |              |              |                                  |                                                          |             |          |
|---|-------------------|----------------------|-------------|-------------|----------------------|------|--------------|--------------|----------------------------------|----------------------------------------------------------|-------------|----------|
| 1 | randomised trials | serious <sup>f</sup> | not serious | not serious | serious <sup>e</sup> | none | 9/18 (50.0%) | 6/19 (31.6%) | <b>RR 1.58</b><br>(0.71 to 3.55) | <b>183 more per 1,000</b><br>(from 92 fewer to 805 more) | ⊕⊕○○<br>LOW | CRITICAL |
|---|-------------------|----------------------|-------------|-------------|----------------------|------|--------------|--------------|----------------------------------|----------------------------------------------------------|-------------|----------|

| Certainty assessment |              |              |               |              |             |                      | № of patients                  |                                                         | Effect            |                   | Certainty | Importance |
|----------------------|--------------|--------------|---------------|--------------|-------------|----------------------|--------------------------------|---------------------------------------------------------|-------------------|-------------------|-----------|------------|
| № of studies         | Study design | Risk of bias | Inconsistency | Indirectness | Imprecision | Other considerations | <i>L. rhamnosus</i> ATCC 53103 | Placebo or standard of care or placebo+standard of care | Relative (95% CI) | Absolute (95% CI) |           |            |

Relapse (follow up: 12 months; assessed with: CDAI >150)

|   |                   |                      |             |             |                      |      |              |              |                                  |                                                         |             |          |
|---|-------------------|----------------------|-------------|-------------|----------------------|------|--------------|--------------|----------------------------------|---------------------------------------------------------|-------------|----------|
| 1 | randomised trials | serious <sup>f</sup> | not serious | not serious | serious <sup>e</sup> | none | 3/18 (16.7%) | 2/19 (10.5%) | <b>RR 1.58</b><br>(0.30 to 8.40) | <b>61 more per 1,000</b><br>(from 74 fewer to 779 more) | ⊕⊕○○<br>LOW | CRITICAL |
|---|-------------------|----------------------|-------------|-------------|----------------------|------|--------------|--------------|----------------------------------|---------------------------------------------------------|-------------|----------|

Adverse events

|   |                   |                          |             |                        |                      |      |                                                                                                                                                                                                                                                                                                                                                                                                                                                                                                                                         |  |  |                  |          |
|---|-------------------|--------------------------|-------------|------------------------|----------------------|------|-----------------------------------------------------------------------------------------------------------------------------------------------------------------------------------------------------------------------------------------------------------------------------------------------------------------------------------------------------------------------------------------------------------------------------------------------------------------------------------------------------------------------------------------|--|--|------------------|----------|
| 1 | randomised trials | serious <sup>a,b,f</sup> | not serious | serious <sup>c,d</sup> | serious <sup>e</sup> | none | One study (Schultz 2004) reported mild bloating which occurred in both probiotic and placebo groups. No other adverse events were reported (Schultz 2004). Patients were not withdrawn from the trial which used <i>L. rhamnosus</i> ATCC 53103 (2 x 10 <sup>9</sup> CFU per day) for 6 months. Prantera 2002a reported there were no adverse events relating solely to the use of the probiotic ( <i>L. rhamnosus</i> ATCC 53103). Diarrhoea and bloating occurred in a similar proportion of patients receiving probiotic or placebo. |  |  | ⊕○○○<br>VERY LOW | CRITICAL |
|---|-------------------|--------------------------|-------------|------------------------|----------------------|------|-----------------------------------------------------------------------------------------------------------------------------------------------------------------------------------------------------------------------------------------------------------------------------------------------------------------------------------------------------------------------------------------------------------------------------------------------------------------------------------------------------------------------------------------|--|--|------------------|----------|

**CI:** Confidence interval; **OR:** Odds ratio; **RR:** Risk ratio

## Explanations

- Allocation concealment and/or blinding of outcome assessor unclear in Schultz 2004.
- Use of corticosteroids in both arms of Schultz 2004 could be a confounder.
- Age of patients and setting was not reported; therefore, it is difficult to speak to the generalizability of the results.



d. Schultz 2004 used antibiotics for 2 weeks prior to intervention, which is not consistent with clinical practice.

e. The 95% CI includes the potential for both appreciable benefit as well as appreciable harm. Few events reported do not meet the optimal information size and suggest fragility in the estimate.

f. Prantera 2002a had uncertain allocation concealment and loss of 8 subjects in follow up, which is impactful given the few events reported do not meet the optimal information size and suggest fragility in the estimate.

### Forest Plots

Clinical Remission (follow up: 12 weeks; assessed with: defined as CDAI<150)

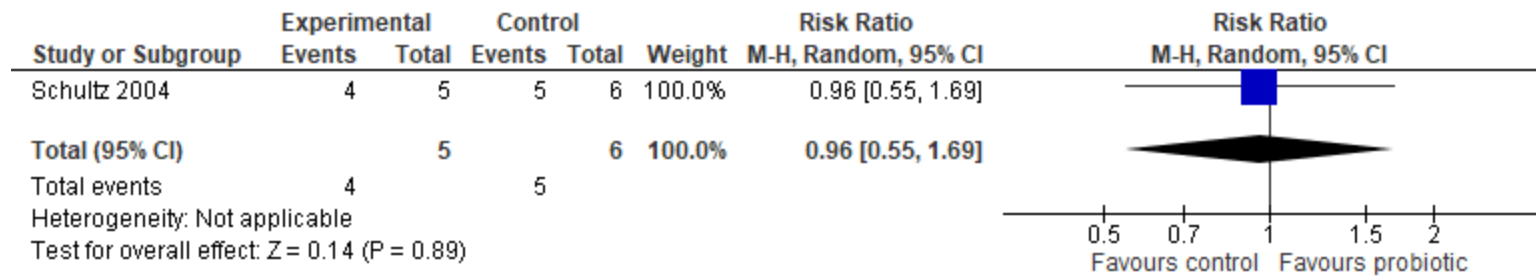

Relapse (follow up: 6 months; assessed with: >100 points in CDAI score)

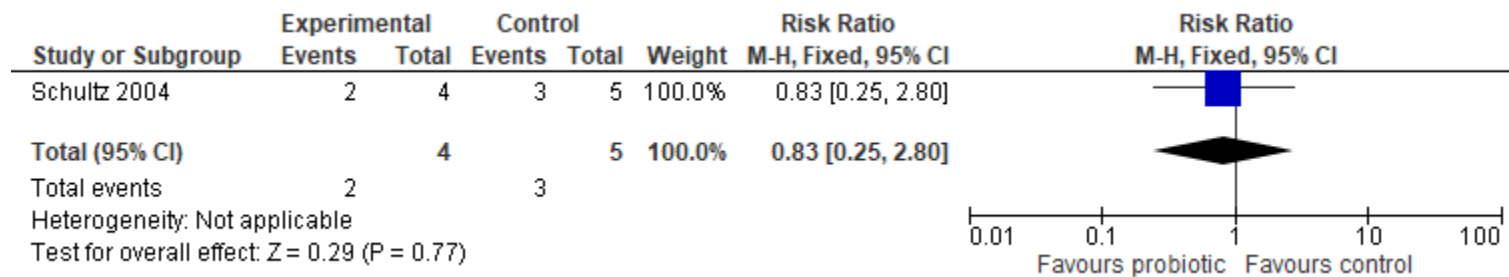

Relapse (follow up: 12 months; assessed with: endoscopy)

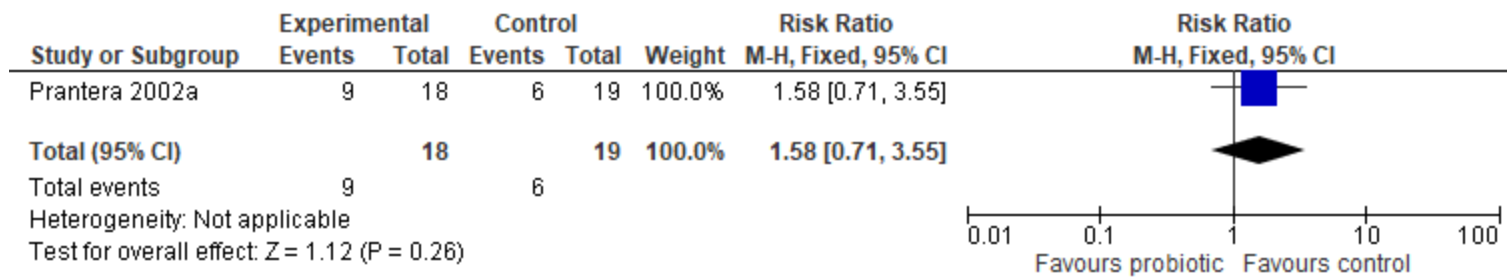

Relapse (follow up: 12 months; assessed with: CDAI >150)

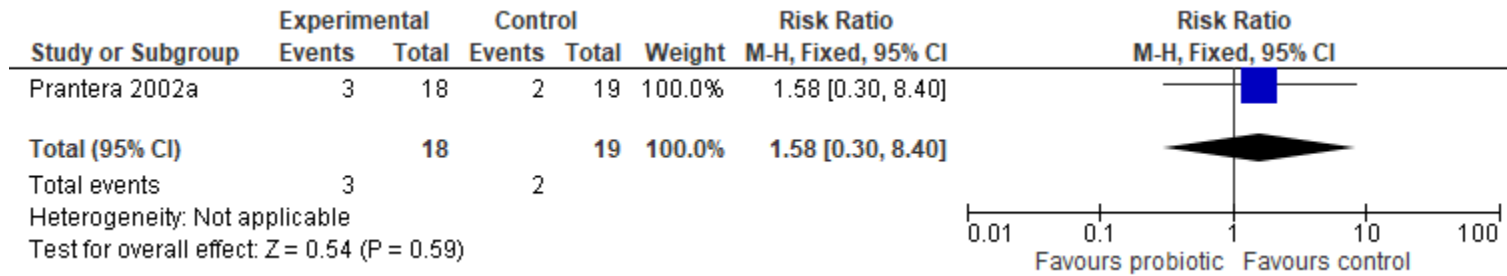

Question: *Escherichia coli* Nissle 1917 compared to placebo in patients with Crohn’s disease (3b)

Bibliography: Malchow 1997

| Certainty assessment |              |              |               |              |             |                      | № of patients              |         | Effect            |                   | Certainty | Importance |
|----------------------|--------------|--------------|---------------|--------------|-------------|----------------------|----------------------------|---------|-------------------|-------------------|-----------|------------|
| № of studies         | Study design | Risk of bias | Inconsistency | Indirectness | Imprecision | Other considerations | <i>E. coli</i> Nissle 1917 | Placebo | Relative (95% CI) | Absolute (95% CI) |           |            |

Relapsed at end of treatment (defined as CDAI>150, PCDAI >10, or endoscopically)

|   |                   |                      |             |             |                      |      |              |              |                                  |                                                            |             |          |
|---|-------------------|----------------------|-------------|-------------|----------------------|------|--------------|--------------|----------------------------------|------------------------------------------------------------|-------------|----------|
| 1 | randomised trials | serious <sup>a</sup> | not serious | not serious | serious <sup>b</sup> | none | 3/10 (30.0%) | 7/10 (70.0%) | <b>RR 0.43</b><br>(0.15 to 1.20) | <b>399 fewer per 1,000</b><br>(from 595 fewer to 140 more) | ⊕⊕○○<br>LOW | CRITICAL |
|---|-------------------|----------------------|-------------|-------------|----------------------|------|--------------|--------------|----------------------------------|------------------------------------------------------------|-------------|----------|

Adverse events

|   |                   |                      |             |             |                      |      |             |             |               |  |             |          |
|---|-------------------|----------------------|-------------|-------------|----------------------|------|-------------|-------------|---------------|--|-------------|----------|
| 1 | randomised trials | serious <sup>a</sup> | not serious | not serious | serious <sup>b</sup> | none | 0/10 (0.0%) | 0/10 (0.0%) | not estimable |  | ⊕⊕○○<br>LOW | CRITICAL |
|---|-------------------|----------------------|-------------|-------------|----------------------|------|-------------|-------------|---------------|--|-------------|----------|

CI: Confidence interval; RR: Risk ratio

## Explanations

a. Allocation generation and concealment unclear for Malchow 1997, missing data of 6 in intervention group and 2 in comparator group. In addition, all patients had active disease at enrollment and received prednisone which could impact lack of difference between the two groups.

b. The 95% CI includes the potential for both appreciable benefit as well as appreciable harm. Few events reported do not meet the optimal information size and suggest fragility in the estimate.

### Forest Plots

Relapsed at end of treatment (defined as CDAI>150, PCDAI >10, or endoscopically)

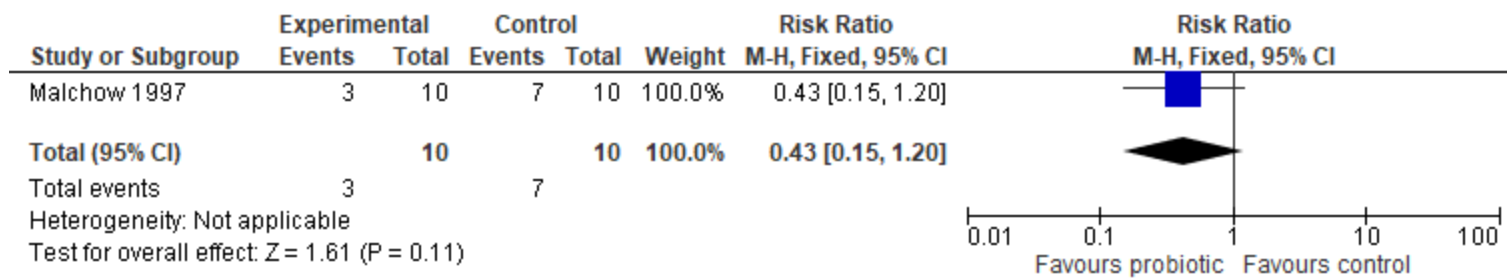

**Question:** *Lactobacillus paracasei* subsp. *paracasei* + *Lactobacillus plantarum* + *Lactobacillus acidophilus* + *Lactobacillus delbrueckii* subsp. *bulgaricus* + *Bifidobacterium longum* subsp. *longum* + *Bifidobacterium breve* + *B. longum* subsp. *infantis* + *Streptococcus salivarius* subsp. *thermophilus* compared to placebo +/- mesalamine in patients with Crohn's disease (3c)

**Bibliography:** Fedorak 2015, Campieri 2010

| Certainty assessment |              |              |               |              |             |                      | № of patients                                                                                                                                                                                                                                                                                    |                        | Effect            |                   | Certainty | Importance |
|----------------------|--------------|--------------|---------------|--------------|-------------|----------------------|--------------------------------------------------------------------------------------------------------------------------------------------------------------------------------------------------------------------------------------------------------------------------------------------------|------------------------|-------------------|-------------------|-----------|------------|
| № of studies         | Study design | Risk of bias | Inconsistency | Indirectness | Imprecision | Other considerations | <i>L. paracasei</i> subsp. <i>paracasei</i> + <i>L. plantarum</i> + <i>L. acidophilus</i> + <i>L. delbrueckii</i> subsp. <i>bulgaricus</i> + <i>B. longum</i> subsp. <i>longum</i> + <i>B. breve</i> + <i>B. longum</i> subsp. <i>infantis</i> + <i>S. salivarius</i> subsp. <i>thermophilus</i> | Placebo +/- mesalamine | Relative (95% CI) | Absolute (95% CI) |           |            |

Relapse of disease endoscopically

|   |                   |                      |             |                      |                      |      |              |              |                           |                                                     |                   |          |
|---|-------------------|----------------------|-------------|----------------------|----------------------|------|--------------|--------------|---------------------------|-----------------------------------------------------|-------------------|----------|
| 1 | randomised trials | serious <sup>a</sup> | not serious | serious <sup>b</sup> | serious <sup>c</sup> | none | 4/20 (20.0%) | 8/20 (40.0%) | RR 0.50<br>(0.18 to 1.40) | 200 fewer per 1,000<br>(from 328 fewer to 160 more) | ⊕○○○○<br>VERY LOW | CRITICAL |
|---|-------------------|----------------------|-------------|----------------------|----------------------|------|--------------|--------------|---------------------------|-----------------------------------------------------|-------------------|----------|

Severe endoscopic relapse

| Certainty assessment |                   |                        |               |                      |                      |                      | № of patients                                                                                                                                                                                                                                                                                    |                        | Effect                           |                                                           | Certainty         | Importance |
|----------------------|-------------------|------------------------|---------------|----------------------|----------------------|----------------------|--------------------------------------------------------------------------------------------------------------------------------------------------------------------------------------------------------------------------------------------------------------------------------------------------|------------------------|----------------------------------|-----------------------------------------------------------|-------------------|------------|
| № of studies         | Study design      | Risk of bias           | Inconsistency | Indirectness         | Imprecision          | Other considerations |                                                                                                                                                                                                                                                                                                  | Placebo +/- mesalamine | Relative (95% CI)                | Absolute (95% CI)                                         |                   |            |
|                      |                   |                        |               |                      |                      |                      | <i>L. paracasei</i> subsp. <i>paracasei</i> + <i>L. plantarum</i> + <i>L. acidophilus</i> + <i>L. delbrueckii</i> subsp. <i>bulgaricus</i> + <i>B. longum</i> subsp. <i>longum</i> + <i>B. breve</i> + <i>B. longum</i> subsp. <i>infantis</i> + <i>S. salivarius</i> subsp. <i>thermophilus</i> |                        |                                  |                                                           |                   |            |
| 2                    | randomised trials | serious <sup>a,d</sup> | not serious   | serious <sup>b</sup> | serious <sup>c</sup> | none                 | 8/63 (12.7%)                                                                                                                                                                                                                                                                                     | 16/71 (22.5%)          | <b>RR 0.54</b><br>(0.25 to 1.17) | <b>104 fewer per 1,000</b><br>(from 169 fewer to 36 more) | ⊕○○○○<br>VERY LOW | CRITICAL   |

Adverse events

|   |                   |                        |             |                      |                      |      |                               |               |                                  |                                                          |                   |          |
|---|-------------------|------------------------|-------------|----------------------|----------------------|------|-------------------------------|---------------|----------------------------------|----------------------------------------------------------|-------------------|----------|
| 2 | randomised trials | serious <sup>a,d</sup> | not serious | serious <sup>b</sup> | serious <sup>c</sup> | none | 31/78 (39.7%)<br><sup>e</sup> | 40/82 (48.8%) | <b>RR 0.83</b><br>(0.61 to 1.12) | <b>83 fewer per 1,000</b><br>(from 190 fewer to 59 more) | ⊕○○○○<br>VERY LOW | CRITICAL |
|---|-------------------|------------------------|-------------|----------------------|----------------------|------|-------------------------------|---------------|----------------------------------|----------------------------------------------------------|-------------------|----------|

CI: Confidence interval; RR: Risk ratio

## Explanations

- a. Sequence generation and allocation concealment unclear, and only physicians blinded in Campieri 2000.
- b. Mesalamine not typically used post-operative in standard care and results may not be generalizable to the research question.
- c. The 95% CI includes the potential for both appreciable benefit as well as appreciable harm. Few events reported do not meet the optimal information size and suggest fragility in the estimate.
- d. Unclear blinding of outcome assessor in Fedorak 2015.
- e. Includes all adverse events reported in Fedorak 2015. Of those, serious adverse events reported are 1 in Probiotic arm and 5 in Placebo arm.

### Forest Plots

#### Severe endoscopic relapse

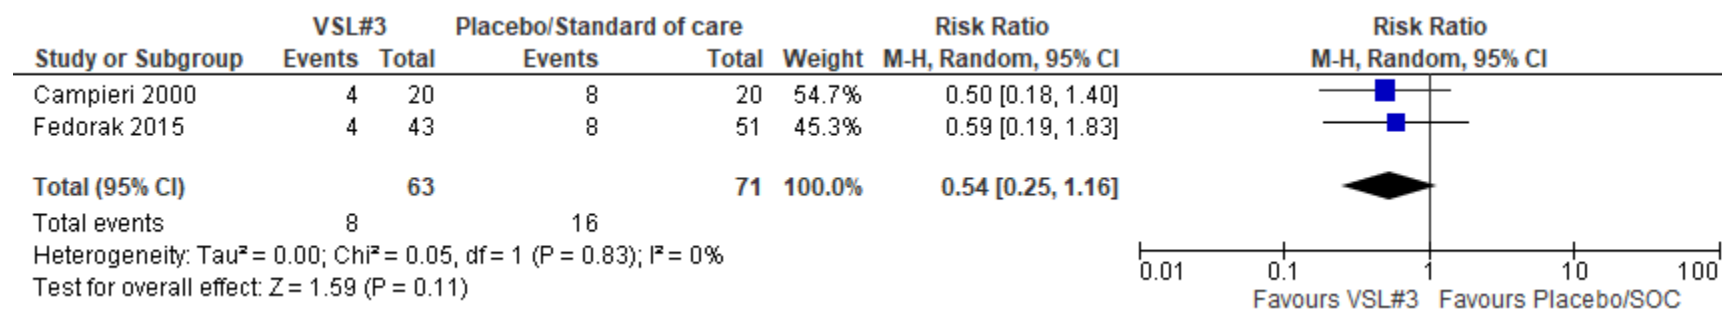

#### Adverse events

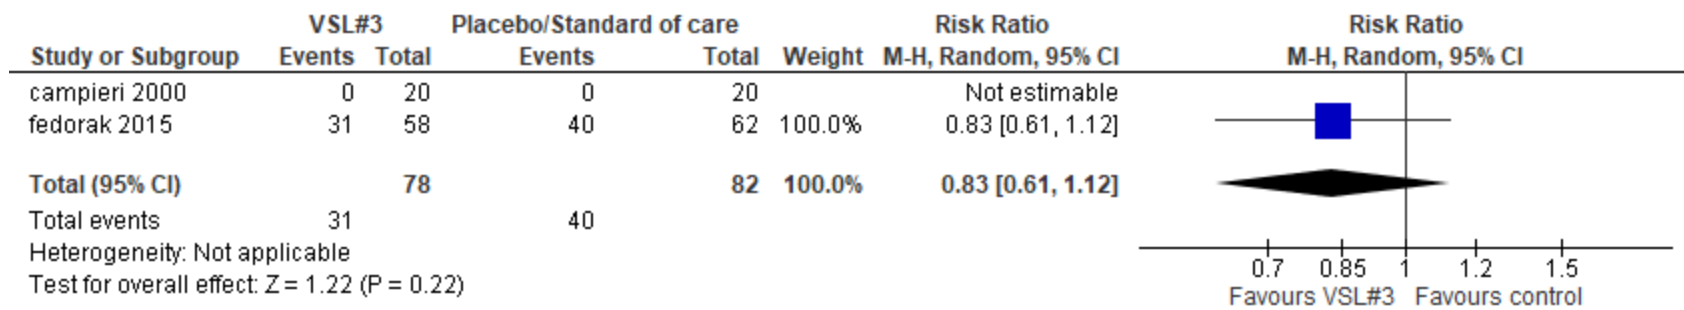



Question: *Lactobacillus rhamnosus* ATCC 53103 + maintenance therapy compared to placebo + maintenance therapy in patients with Crohn's disease (3d)

Bibliography: Bousvaros 2005

| Certainty assessment |              |              |               |              |             |                      | № of patients                                        |                               | Effect            |                   | Certainty | Importance |
|----------------------|--------------|--------------|---------------|--------------|-------------|----------------------|------------------------------------------------------|-------------------------------|-------------------|-------------------|-----------|------------|
| № of studies         | Study design | Risk of bias | Inconsistency | Indirectness | Imprecision | Other considerations | <i>L. rhamnosus</i> ATCC 53103 + maintenance therapy | Placebo + maintenance therapy | Relative (95% CI) | Absolute (95% CI) |           |            |

Relapse as measured by PCDAI

|   |                   |             |             |                          |                           |      |               |              |                                  |                                                          |             |          |
|---|-------------------|-------------|-------------|--------------------------|---------------------------|------|---------------|--------------|----------------------------------|----------------------------------------------------------|-------------|----------|
| 1 | randomised trials | not serious | not serious | not serious <sup>a</sup> | very serious <sup>b</sup> | none | 12/39 (30.8%) | 6/36 (16.7%) | <b>RR 1.85</b><br>(0.77 to 4.40) | <b>142 more per 1,000</b><br>(from 38 fewer to 567 more) | ⊕⊕○○<br>LOW | CRITICAL |
|---|-------------------|-------------|-------------|--------------------------|---------------------------|------|---------------|--------------|----------------------------------|----------------------------------------------------------|-------------|----------|

Adverse events

|   |                   |             |             |                          |                           |      |              |              |                                  |                                                           |             |          |
|---|-------------------|-------------|-------------|--------------------------|---------------------------|------|--------------|--------------|----------------------------------|-----------------------------------------------------------|-------------|----------|
| 1 | randomised trials | not serious | not serious | not serious <sup>a</sup> | very serious <sup>b</sup> | none | 7/39 (17.9%) | 8/36 (22.2%) | <b>RR 0.81</b><br>(0.33 to 2.00) | <b>42 fewer per 1,000</b><br>(from 149 fewer to 222 more) | ⊕⊕○○<br>LOW | CRITICAL |
|---|-------------------|-------------|-------------|--------------------------|---------------------------|------|--------------|--------------|----------------------------------|-----------------------------------------------------------|-------------|----------|

CI: Confidence interval; RR: Risk ratio

## Explanations

a. various maintenance therapies not controlled in Bousvaros 2005.

b. The 95% CI includes the potential for both appreciable benefit as well as appreciable harm. Few events reported do not meet the optimal information size and suggest fragility in the estimate.

### Forest Plots

Relapse as measured by PCDAI

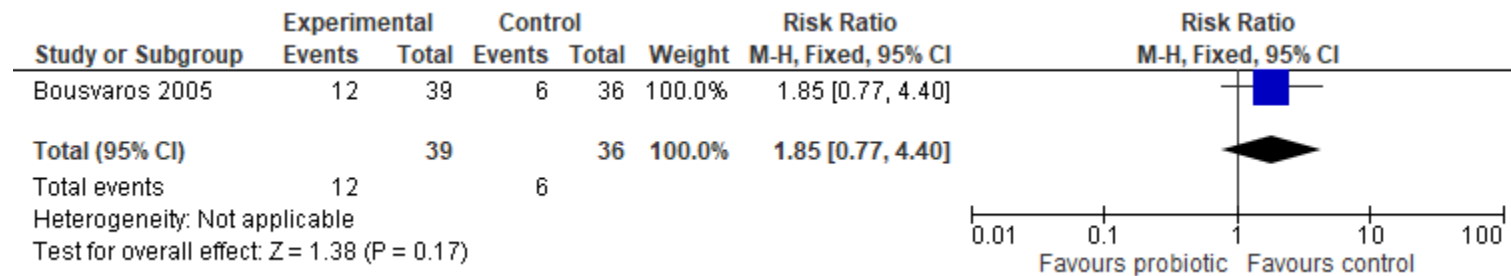

### Adverse Events

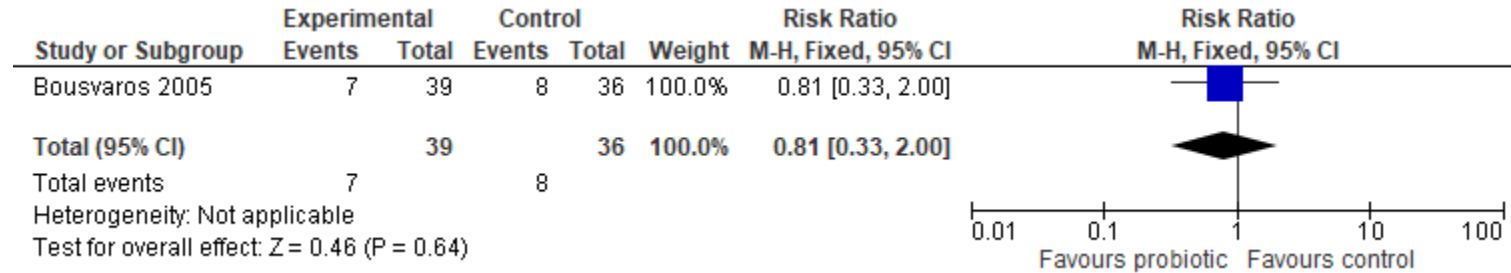

**Question:** *Lactobacillus rhamnosus* ATCC 53103 + mesalamine compared to mesalamine alone in patients with Crohn's disease (3e)

**Bibliography:** Zocco 2003

| Certainty assessment |              |              |               |              |             |                      | No of patients                              |                  | Effect            |                   | Certainty | Importance |
|----------------------|--------------|--------------|---------------|--------------|-------------|----------------------|---------------------------------------------|------------------|-------------------|-------------------|-----------|------------|
| No of studies        | Study design | Risk of bias | Inconsistency | Indirectness | Imprecision | Other considerations | <i>L. rhamnosus</i> ATCC 53103 + mesalamine | Mesalamine alone | Relative (95% CI) | Absolute (95% CI) |           |            |

Relapse as measured by CDAI

|   |                   |                      |             |         |                           |      |              |              |                                  |                                                           |                   |          |
|---|-------------------|----------------------|-------------|---------|---------------------------|------|--------------|--------------|----------------------------------|-----------------------------------------------------------|-------------------|----------|
| 1 | randomised trials | serious <sup>a</sup> | not serious | serious | very serious <sup>b</sup> | none | 2/11 (18.2%) | 3/12 (25.0%) | <b>RR 0.73</b><br>(0.15 to 3.57) | <b>68 fewer per 1,000</b><br>(from 213 fewer to 643 more) | ⊕○○○○<br>VERY LOW | CRITICAL |
|---|-------------------|----------------------|-------------|---------|---------------------------|------|--------------|--------------|----------------------------------|-----------------------------------------------------------|-------------------|----------|

**CI:** Confidence interval; **RR:** Risk ratio

## Explanations

a. Sequence generation and allocation concealment unclear, blinding unclear.

b. The 95% CI includes the potential for both benefit and harm.

Forest Plots

Relapse as measured by CDAI

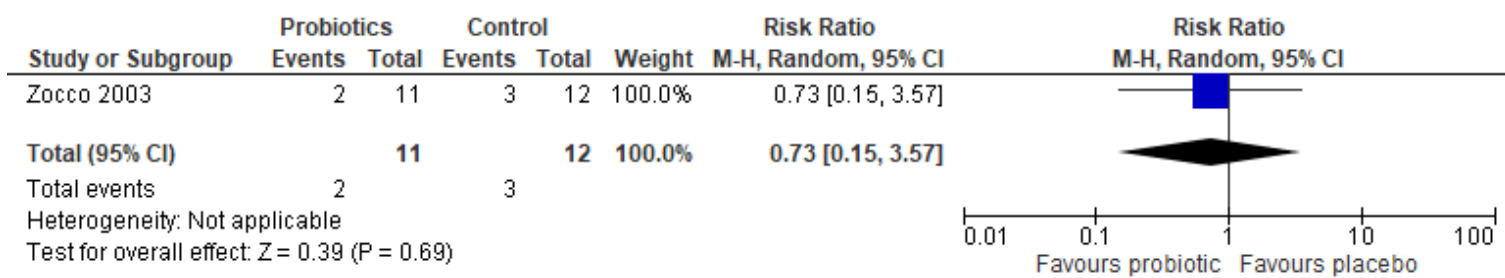

Question: *Lactobacillus rhamnosus* ATCC 53103 compared to mesalamine in patients with Crohn's disease (3f)

Bibliography: Zocco 2003

| Certainty assessment |              |              |               |              |             |                      | № of patients                  |            | Effect            |                   | Certainty | Importance |
|----------------------|--------------|--------------|---------------|--------------|-------------|----------------------|--------------------------------|------------|-------------------|-------------------|-----------|------------|
| № of studies         | Study design | Risk of bias | Inconsistency | Indirectness | Imprecision | Other considerations | <i>L. rhamnosus</i> ATCC 53103 | Mesalamine | Relative (95% CI) | Absolute (95% CI) |           |            |

Remission based on CDAI (follow up: 12 months)

|   |                   |                      |             |                      |                      |      |              |              |                           |                                                    |                  |          |
|---|-------------------|----------------------|-------------|----------------------|----------------------|------|--------------|--------------|---------------------------|----------------------------------------------------|------------------|----------|
| 1 | randomised trials | serious <sup>a</sup> | not serious | serious <sup>b</sup> | serious <sup>c</sup> | none | 2/12 (16.7%) | 3/12 (25.0%) | RR 0.67<br>(0.13 to 3.30) | 82 fewer per 1,000<br>(from 218 fewer to 575 more) | ⊕○○○<br>VERY LOW | CRITICAL |
|---|-------------------|----------------------|-------------|----------------------|----------------------|------|--------------|--------------|---------------------------|----------------------------------------------------|------------------|----------|

CI: Confidence interval; RR: Risk ratio

## Explanations

- a. unclear sequence generation, allocation concealment, and blinding.
- b. the comparison, mesalamine, is not considered standard of care because of uncertain efficacy, for patients with Crohn's disease.
- c. The 95% CI includes the potential for both benefit and harm.

### Forest Plots

Remission based on CDAI (follow up: 12 months)

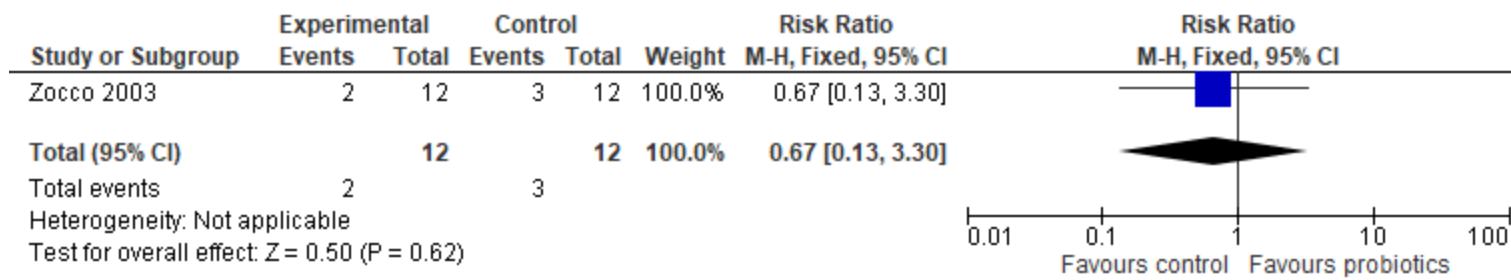

Question: *Saccharomyces boulardii* compared to placebo +/- mesalamine alone in patients with Crohn's disease (3g)

Bibliography: Bourreille 2013, Guslandi 2000

| Certainty assessment |              |              |               |              |             |                      | № of patients       |                              | Effect            |                   | Certainty | Importance |
|----------------------|--------------|--------------|---------------|--------------|-------------|----------------------|---------------------|------------------------------|-------------------|-------------------|-----------|------------|
| № of studies         | Study design | Risk of bias | Inconsistency | Indirectness | Imprecision | Other considerations | <i>S. boulardii</i> | placebo +/- mesalamine alone | Relative (95% CI) | Absolute (95% CI) |           |            |

Relapse as measured by CDAI

|   |                   |                      |             |                      |                           |      |               |               |                        |                                                  |                  |          |
|---|-------------------|----------------------|-------------|----------------------|---------------------------|------|---------------|---------------|------------------------|--------------------------------------------------|------------------|----------|
| 2 | randomised trials | serious <sup>a</sup> | not serious | serious <sup>b</sup> | very serious <sup>c</sup> | none | 39/96 (40.6%) | 48/95 (50.5%) | RR 0.51 (0.10 to 2.54) | 248 fewer per 1,000 (from 455 fewer to 778 more) | ⊕○○○<br>VERY LOW | CRITICAL |
|---|-------------------|----------------------|-------------|----------------------|---------------------------|------|---------------|---------------|------------------------|--------------------------------------------------|------------------|----------|

Adverse events

|   |                   |                      |             |                      |                      |      |               |               |                        |                                                |                  |          |
|---|-------------------|----------------------|-------------|----------------------|----------------------|------|---------------|---------------|------------------------|------------------------------------------------|------------------|----------|
| 1 | randomised trials | serious <sup>d</sup> | not serious | serious <sup>b</sup> | serious <sup>c</sup> | none | 49/84 (58.3%) | 45/81 (55.6%) | RR 1.05 (0.80 to 1.37) | 28 more per 1,000 (from 111 fewer to 206 more) | ⊕○○○<br>VERY LOW | CRITICAL |
|---|-------------------|----------------------|-------------|----------------------|----------------------|------|---------------|---------------|------------------------|------------------------------------------------|------------------|----------|

CI: Confidence interval; RR: Risk ratio

Explanations

- a. Allocation concealment unclear, unclear physician blinding in Guslandi 2000, and unclear random sequence generation and unclear risk of incomplete reporting for both studies.
- b. Use of mesalazine as maintenance therapy in this setting is atypical for treating patients with Crohn's disease. Guslandi 2000 treated intervention arm with low dose mesalazine and compared to mesalazine alone. Both control group and intervention arm receiving same medication in Guslandi 2000.
- c. The 95% CI includes the potential for both appreciable benefit as well as appreciable harm. Few events reported do not meet the optimal information size and suggest fragility in the estimate.
- d. Unclear risk of selection, detection, and attrition bias

## Forest Plots

Relapse as measured by CDAI

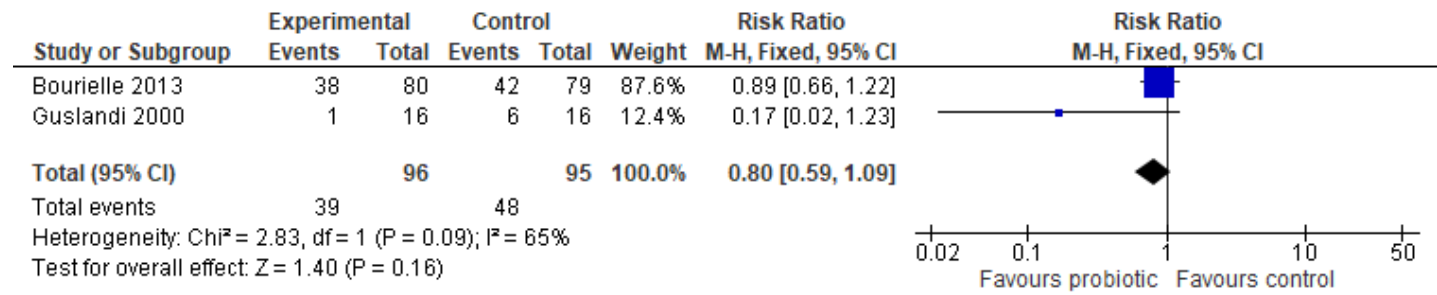

## Adverse Events

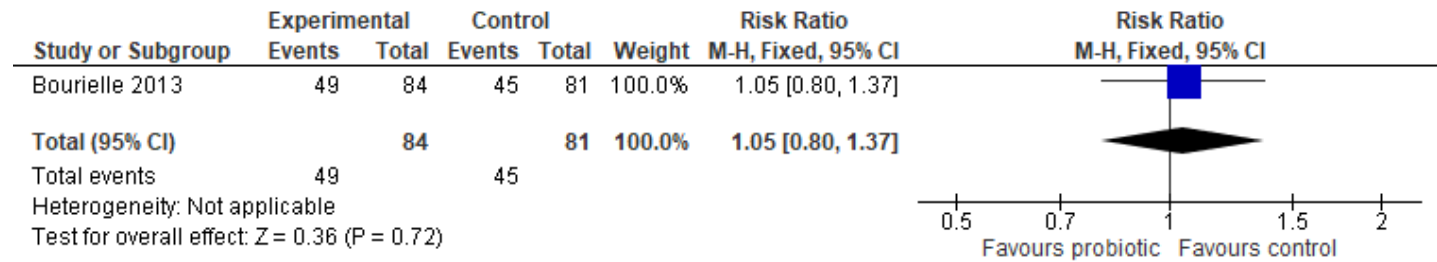



**Question:** *Lactobacillus johnsonii* NCC 533 compared to placebo in prevention of endoscopic recurrence after surgery for Crohn's disease (3h)

**Bibliography:** Van Gossum 2007, Marteau 2006

| Certainty assessment |              |              |               |              |             |                      | No of patients              |         | Effect            |                   | Certainty | Importance |
|----------------------|--------------|--------------|---------------|--------------|-------------|----------------------|-----------------------------|---------|-------------------|-------------------|-----------|------------|
| No of studies        | Study design | Risk of bias | Inconsistency | Indirectness | Imprecision | Other considerations | <i>L. johnsonii</i> NCC 533 | Placebo | Relative (95% CI) | Absolute (95% CI) |           |            |

Severe Endoscopic Relapse

|   |                   |                      |             |             |                      |      |               |               |                               |                                                       |             |          |
|---|-------------------|----------------------|-------------|-------------|----------------------|------|---------------|---------------|-------------------------------|-------------------------------------------------------|-------------|----------|
| 2 | randomised trials | serious <sup>a</sup> | not serious | not serious | serious <sup>b</sup> | none | 15/71 (21.1%) | 16/74 (21.6%) | <b>RR 0.97</b> (0.52 to 1.83) | <b>6 fewer per 1,000</b> (from 104 fewer to 179 more) | ⊕⊕○○<br>LOW | CRITICAL |
|---|-------------------|----------------------|-------------|-------------|----------------------|------|---------------|---------------|-------------------------------|-------------------------------------------------------|-------------|----------|

Endoscopic Recurrence

|   |                   |                      |             |             |                      |      |               |               |                               |                                                        |             |          |
|---|-------------------|----------------------|-------------|-------------|----------------------|------|---------------|---------------|-------------------------------|--------------------------------------------------------|-------------|----------|
| 1 | randomised trials | serious <sup>c</sup> | not serious | not serious | serious <sup>b</sup> | none | 21/43 (48.8%) | 30/47 (63.8%) | <b>RR 0.77</b> (0.53 to 1.11) | <b>147 fewer per 1,000</b> (from 300 fewer to 70 more) | ⊕⊕○○<br>LOW | CRITICAL |
|---|-------------------|----------------------|-------------|-------------|----------------------|------|---------------|---------------|-------------------------------|--------------------------------------------------------|-------------|----------|

CI: Confidence interval; RR: Risk ratio

**Explanations**

a. Unclear risk of random sequence generation and selective reporting

b. The 95% CI includes the potential for both appreciable benefit as well as appreciable harm. Few events reported do not meet the optimal information size and suggest fragility in the estimate.

c. unclear risk of selective reporting

Forest plots

Severe Endoscopic Relapse (proportion with severe recurrence i3+i4)

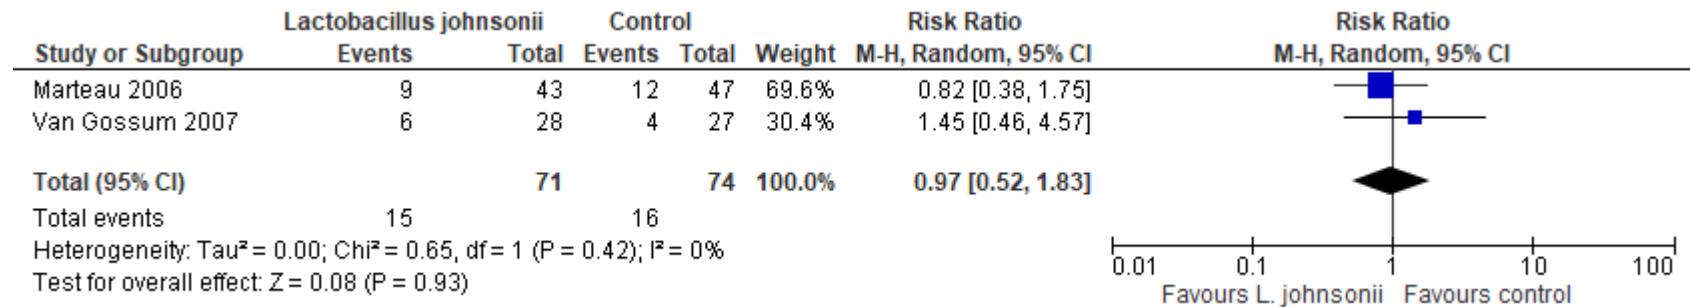

Endoscopic Recurrence (endoscopic score >i1)

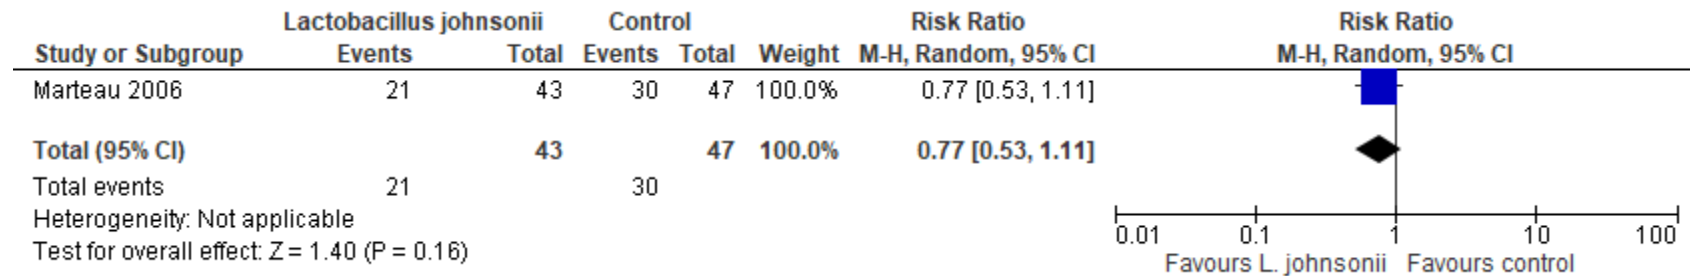

## Appendix 4: Should probiotics be used in patients with ulcerative colitis?

### Bibliography

Included from: Mallon P, McKay D, Kirk S, Gardiner K. Probiotics for induction of remission in ulcerative colitis. *Cochrane Database Syst Rev* 2007;CD005573.

Furrie E, Macfarlane S, Kennedy A, et al. Synbiotic therapy (Bifidobacterium longum/Synergy 1) initiates resolution of inflammation in patients with active ulcerative colitis: a randomised controlled pilot trial. *Gut* 2005;54:242-9.

Kato K, Mizuno S, Umesaki Y, et al. Randomized placebo-controlled trial assessing the effect of bifidobacteria-fermented milk on active ulcerative colitis. *Aliment Pharmacol Ther* 2004;20:1133-41.

Rembacken BJ, Snelling AM, Hawkey PM, Chalmers DM, Axon AT. Non-pathogenic *Escherichia coli* versus mesalazine for the treatment of ulcerative colitis: a randomised trial. *Lancet* 1999;354:635-9.

Tursi A, Brandimarte G, Giorgetti GM, Forti G, Modeo ME, Gigliobianco A. Low-dose balsalazide plus a high-potency probiotic preparation is more effective than balsalazide alone or mesalazine in the treatment of acute mild-to-moderate ulcerative colitis. *Med Sci Monit* 2004;10:PI126-31.

Matthes H, Krummenerl T, Giensch M, Wolff C, Schulze J. Clinical trial: probiotic treatment of acute distal ulcerative colitis with rectally administered *Escherichia coli* Nissle 1917 (EcN). *BMC Complement Altern Med* 2010;10:13.

Miele E, Pascarella F, Giannetti E, Quaglietta L, Baldassano RN, Staiano A. Effect of a probiotic preparation (VSL#3) on induction and maintenance of remission in children with ulcerative colitis. *Am J Gastroenterol* 2009;104:437-43.

Sood A, Midha V, Makharia GK, et al. The probiotic preparation, VSL#3 induces remission in patients with mild-to-moderately active ulcerative colitis. *Clin Gastroenterol Hepatol* 2009;7:1202-9, 9 e1.

Tursi A, Brandimarte G, Papa A, et al. Treatment of relapsing mild-to-moderate ulcerative colitis with the probiotic VSL#3 as adjunctive to a standard pharmaceutical treatment: a double-blind, randomized, placebo-controlled study. *Am J Gastroenterol* 2010;105:2218-27.

Oliva S, Di Nardo G, Ferrari F, et al. Randomised clinical trial: the effectiveness of *Lactobacillus reuteri* ATCC 55730 rectal enema in children with active distal ulcerative colitis. *Aliment Pharmacol Ther* 2012;35:327-34.

Petersen AM, Mirsepasi H, Halkjaer SI, Mortensen EM, Nordgaard-Lassen I, Krogfelt KA. Ciprofloxacin and probiotic *Escherichia coli* Nissle add-on treatment in active ulcerative colitis: a double-blind randomized placebo controlled clinical trial. *J Crohns Colitis* 2014;8:1498-505.

Tamaki H, Nakase H, Inoue S, et al. Efficacy of probiotic treatment with *Bifidobacterium longum* 536 for induction of remission in active ulcerative colitis: A randomized, double-blinded, placebo-controlled multicenter trial. *Dig Endosc* 2016;28:67-74.

Included from: Naidoo K, Gordon M, Fagbemi AO, Thomas AG, Akobeng AK. Probiotics for maintenance of remission in ulcerative colitis. *Cochrane Database Syst Rev* 2011:CD007443.

Kruis W, Schutz E, Fric P, Fixa B, Judmaier G, Stolte M. Double-blind comparison of an oral *Escherichia coli* preparation and mesalazine in maintaining remission of ulcerative colitis. *Aliment Pharmacol Ther* 1997;11:853-8.

Kruis W, Fric P, Pokrotnieks J, et al. Maintaining remission of ulcerative colitis with the probiotic *Escherichia coli* Nissle 1917 is as effective as with standard mesalazine. *Gut* 2004;53:1617-23.

Wildt S, Nordgaard I, Hansen U, Brockmann E, Rumessen JJ. A randomised double-blind placebo-controlled trial with *Lactobacillus acidophilus* La-5 and *Bifidobacterium animalis* subsp. *lactis* BB-12 for maintenance of remission in ulcerative colitis. *J Crohns Colitis* 2011;5:115-21.

Zocco MA, dal Verme LZ, Cremonini F, et al. Efficacy of *Lactobacillus* GG in maintaining remission of ulcerative colitis. *Aliment Pharmacol Ther* 2006;23:1567-74.

Yoshimatsu Y, Yamada A, Furukawa R, et al. Effectiveness of probiotic therapy for the prevention of relapse in patients with inactive ulcerative colitis. *World J Gastroenterol* 2015;21:5985-94.

Matsuoka K, Uemura Y, Kanai T, et al. Efficacy of *Bifidobacterium breve* Fermented Milk in Maintaining Remission of Ulcerative Colitis. *Dig Dis Sci* 2018;63:1910-9.

Question: *Bifidobacterium breve* Yakult + *Bifidobacterium bifidum* Yakult + *Lactobacillus acidophilus* compared to placebo in patients with ulcerative colitis (4a)

Bibliography: Kato 2004

| Certainty assessment |              |              |               |              |             |                      | № of patients                                                             |         | Effect            |                   | Certainty | Importance |
|----------------------|--------------|--------------|---------------|--------------|-------------|----------------------|---------------------------------------------------------------------------|---------|-------------------|-------------------|-----------|------------|
| № of studies         | Study design | Risk of bias | Inconsistency | Indirectness | Imprecision | Other considerations | <i>B. breve</i> Yakult + <i>B. bifidum</i> Yakult + <i>L. acidophilus</i> | Placebo | Relative (95% CI) | Absolute (95% CI) |           |            |

Remission (clinical, endoscopic, or histologic)

|   |                   |                      |             |             |                           |      |              |              |                           |                                                       |                  |          |
|---|-------------------|----------------------|-------------|-------------|---------------------------|------|--------------|--------------|---------------------------|-------------------------------------------------------|------------------|----------|
| 1 | randomized trials | serious <sup>a</sup> | not serious | not serious | very serious <sup>b</sup> | none | 3/10 (30.0%) | 4/10 (40.0%) | RR 0.64<br>(0.10 to 4.10) | 144 fewer per 1,000<br>(from 360 fewer to 1,000 more) | ⊕○○○<br>VERY LOW | CRITICAL |
|---|-------------------|----------------------|-------------|-------------|---------------------------|------|--------------|--------------|---------------------------|-------------------------------------------------------|------------------|----------|

Clinical improvement

|   |                   |                      |             |             |                           |      |              |              |                           |                                                     |                  |          |
|---|-------------------|----------------------|-------------|-------------|---------------------------|------|--------------|--------------|---------------------------|-----------------------------------------------------|------------------|----------|
| 1 | randomized trials | serious <sup>a</sup> | not serious | not serious | very serious <sup>b</sup> | none | 3/10 (30.0%) | 7/10 (70.0%) | RR 0.18<br>(0.03 to 1.24) | 574 fewer per 1,000<br>(from 679 fewer to 168 more) | ⊕○○○<br>VERY LOW | CRITICAL |
|---|-------------------|----------------------|-------------|-------------|---------------------------|------|--------------|--------------|---------------------------|-----------------------------------------------------|------------------|----------|

CI: Confidence interval; RR: Risk ratio

## Explanations

a. Allocation concealment unclear and patients and physicians not blinded

b. The 95% CI includes the potential for both appreciable benefit as well as appreciable harm. Few events reported do not meet the optimal information size and suggest fragility in the estimate.

### Forest Plots

#### Remission

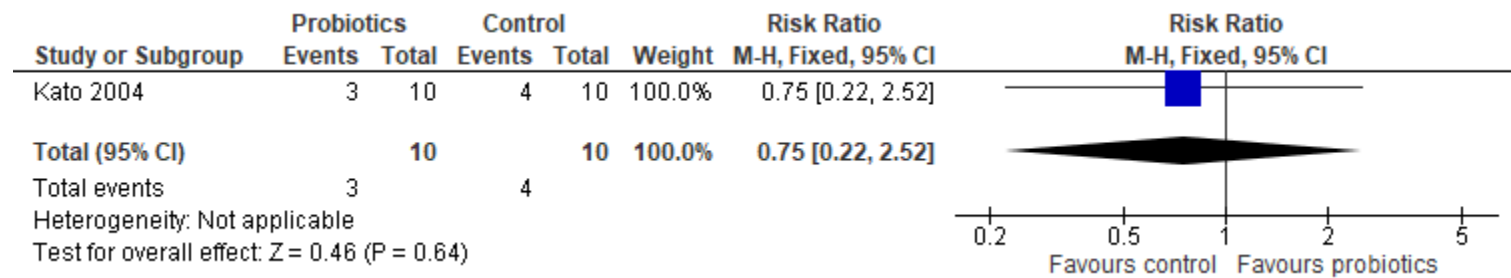

#### Clinical improvement

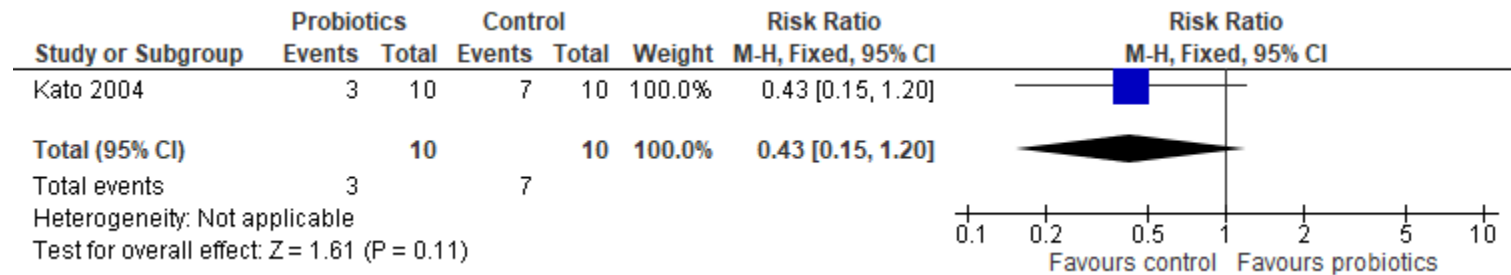

Question: *Bifidobacterium breve* Yakult + *Lactobacillus acidophilus* fermented milk compared to placebo in patients with ulcerative colitis (4b)

Bibliography: Matsuoka 2018

| Certainty assessment |              |              |               |              |             |                      | № of patients                                  |         | Effect            |                   | Certainty | Importance |
|----------------------|--------------|--------------|---------------|--------------|-------------|----------------------|------------------------------------------------|---------|-------------------|-------------------|-----------|------------|
| № of studies         | Study design | Risk of bias | Inconsistency | Indirectness | Imprecision | Other considerations | <i>B. breve</i> Yakult + <i>L. acidophilus</i> | Placebo | Relative (95% CI) | Absolute (95% CI) |           |            |

**Clinical Relapse**

|   |                   |                      |             |             |                      |      |               |               |                        |                                               |             |          |
|---|-------------------|----------------------|-------------|-------------|----------------------|------|---------------|---------------|------------------------|-----------------------------------------------|-------------|----------|
| 1 | randomized trials | serious <sup>a</sup> | not serious | not serious | serious <sup>b</sup> | none | 22/98 (22.4%) | 19/97 (19.6%) | RR 1.15 (0.66 to 1.98) | 29 more per 1,000 (from 67 fewer to 192 more) | ⊕⊕○○<br>LOW | CRITICAL |
|---|-------------------|----------------------|-------------|-------------|----------------------|------|---------------|---------------|------------------------|-----------------------------------------------|-------------|----------|

**Treatment-related Adverse Events (bloating, stress, body odor)**

|   |                   |                      |             |             |                      |      |             |             |                         |                                               |             |          |
|---|-------------------|----------------------|-------------|-------------|----------------------|------|-------------|-------------|-------------------------|-----------------------------------------------|-------------|----------|
| 1 | randomized trials | serious <sup>a</sup> | not serious | not serious | serious <sup>b</sup> | none | 1/98 (1.0%) | 1/97 (1.0%) | RR 0.99 (0.06 to 15.60) | 0 fewer per 1,000 (from 10 fewer to 151 more) | ⊕⊕○○<br>LOW | CRITICAL |
|---|-------------------|----------------------|-------------|-------------|----------------------|------|-------------|-------------|-------------------------|-----------------------------------------------|-------------|----------|

CI: Confidence interval; RR: Risk ratio

## Explanations

a. Unclear risk of blinding of outcome assessor.

b. The 95% CI includes the potential for both appreciable benefit as well as appreciable harm. Few events reported do not meet the optimal information size and suggest fragility in the estimate.

## Forest Plots

### Clinical Relapse

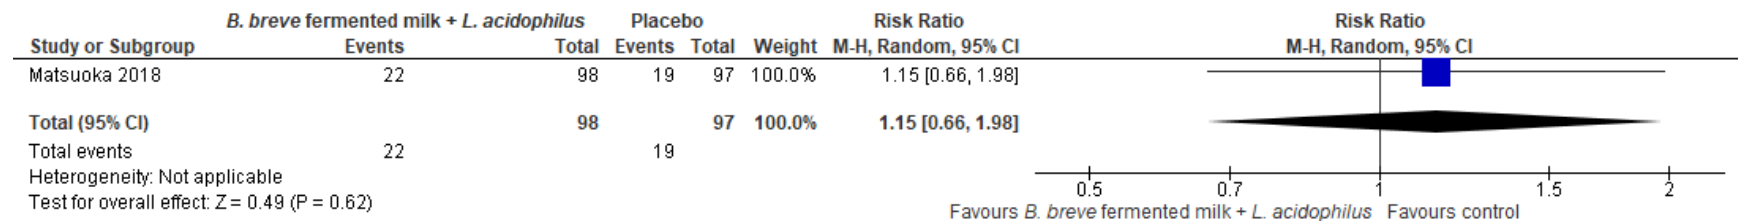

### Treatment-related adverse events

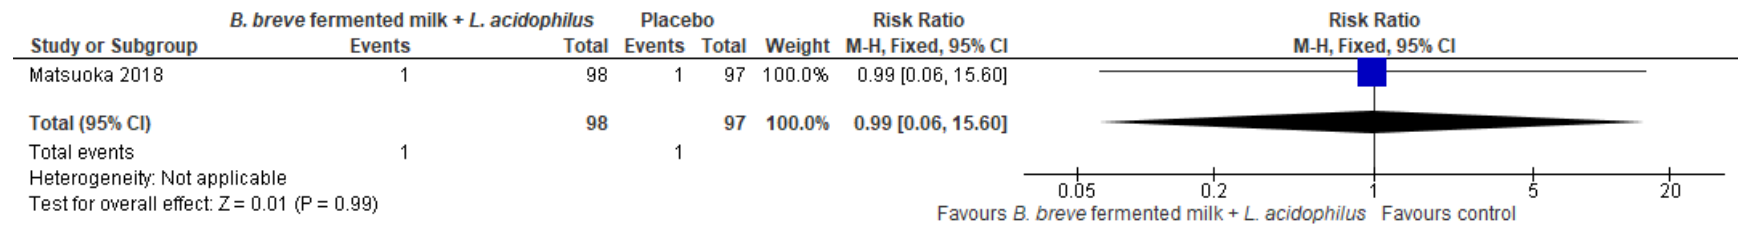



**Question:** *Lactobacillus paracasei* subsp. *paracasei* + *Lactobacillus plantarum* + *Lactobacillus acidophilus* + *Lactobacillus delbrueckii* subsp. *bulgaricus* + *Bifidobacterium longum* subsp. *longum* + *Bifidobacterium breve* + *B. longum* subsp. *infantis* + *Streptococcus salivarius* subsp. *thermophilus* compared to mesalamine alone in patients with ulcerative colitis (4c)

**Bibliography:** Mallon 2007, Sood 2009, Tursi 2004, Tursi 2010

| Certainty assessment |              |              |               |              |             |                      | № of patients                                                                                                                                                                                                                                                                                    |                  | Effect            |                   | Certainty | Importance |
|----------------------|--------------|--------------|---------------|--------------|-------------|----------------------|--------------------------------------------------------------------------------------------------------------------------------------------------------------------------------------------------------------------------------------------------------------------------------------------------|------------------|-------------------|-------------------|-----------|------------|
| № of studies         | Study design | Risk of bias | Inconsistency | Indirectness | Imprecision | Other considerations | <i>L. paracasei</i> subsp. <i>paracasei</i> + <i>L. plantarum</i> + <i>L. acidophilus</i> + <i>L. delbrueckii</i> subsp. <i>bulgaricus</i> + <i>B. longum</i> subsp. <i>longum</i> + <i>B. breve</i> + <i>B. longum</i> subsp. <i>infantis</i> + <i>S. salivarius</i> subsp. <i>thermophilus</i> | mesalamine alone | Relative (95% CI) | Absolute (95% CI) |           |            |

**Remission (clinical)**

|   |                   |                      |                      |                          |                           |      |                |                |                               |                                                       |                   |          |
|---|-------------------|----------------------|----------------------|--------------------------|---------------------------|------|----------------|----------------|-------------------------------|-------------------------------------------------------|-------------------|----------|
| 4 | randomized trials | serious <sup>a</sup> | serious <sup>b</sup> | not serious <sup>c</sup> | very serious <sup>d</sup> | none | 98/186 (52.7%) | 62/181 (34.3%) | <b>RR 1.72</b> (0.89 to 3.32) | <b>247 more per 1,000</b> (from 38 fewer to 795 more) | ⊕○○○○<br>VERY LOW | CRITICAL |
|---|-------------------|----------------------|----------------------|--------------------------|---------------------------|------|----------------|----------------|-------------------------------|-------------------------------------------------------|-------------------|----------|

**Adverse events**

| Certainty assessment |                   |                      |                      |                          |                           |                      | № of patients                                                                                                                                                                                                                                                                                    |                  | Effect                             |                                                            | Certainty        | Importance |
|----------------------|-------------------|----------------------|----------------------|--------------------------|---------------------------|----------------------|--------------------------------------------------------------------------------------------------------------------------------------------------------------------------------------------------------------------------------------------------------------------------------------------------|------------------|------------------------------------|------------------------------------------------------------|------------------|------------|
| № of studies         | Study design      | Risk of bias         | Inconsistency        | Indirectness             | Imprecision               | Other considerations | <i>L. paracasei</i> subsp. <i>paracasei</i> + <i>L. plantarum</i> + <i>L. acidophilus</i> + <i>L. delbrueckii</i> subsp. <i>bulgaricus</i> + <i>B. longum</i> subsp. <i>longum</i> + <i>B. breve</i> + <i>B. longum</i> subsp. <i>infantis</i> + <i>S. salivarius</i> subsp. <i>thermophilus</i> | mesalamine alone | Relative (95% CI)                  | Absolute (95% CI)                                          |                  |            |
| 4                    | randomized trials | serious <sup>a</sup> | serious <sup>b</sup> | not serious <sup>c</sup> | very serious <sup>d</sup> | none                 | 22/172 (12.8%)                                                                                                                                                                                                                                                                                   | 9/168 (5.4%)     | <b>RR 4.05</b><br>(0.08 to 198.28) | <b>163 more per 1,000</b><br>(from 49 fewer to 1,000 more) | ⊕○○○<br>VERY LOW | CRITICAL   |

#### Clinical Response

|   |                   |                      |             |                          |                      |      |                |                |                                  |                                                            |             |          |
|---|-------------------|----------------------|-------------|--------------------------|----------------------|------|----------------|----------------|----------------------------------|------------------------------------------------------------|-------------|----------|
| 2 | randomized trials | serious <sup>a</sup> | not serious | not serious <sup>c</sup> | serious <sup>e</sup> | none | 66/142 (46.5%) | 36/136 (26.5%) | <b>RR 2.88</b><br>(1.49 to 5.57) | <b>498 more per 1,000</b><br>(from 130 more to 1,000 more) | ⊕⊕○○<br>LOW | CRITICAL |
|---|-------------------|----------------------|-------------|--------------------------|----------------------|------|----------------|----------------|----------------------------------|------------------------------------------------------------|-------------|----------|

CI: Confidence interval; RR: Risk ratio

## Explanations

- a. Some studies report not blinded or blinding not clear, 1 study with high risk attrition bias, Tursi 2004 unclear allocation concealment.
- b. Serious heterogeneity observed ( $I^2 = 86\%$ ).
- c. Interventions vary across studies: Tursi 2004 compares probiotics + balsalazide vs balsalazide; Miele 2009 both groups receive mesalamine maintenance therapy.
- d. The 95% CI includes the potential for both appreciable benefit as well as appreciable harm. Few events reported do not meet the optimal information size and suggest fragility in the estimate.
- e. Few events reported do not meet the optimal information size and suggest fragility in the estimate.

Clinical Remission:

| Study or Subgroup                                                                           | VSL#3  |            | Control |            | Weight        | Risk Ratio          |                     |
|---------------------------------------------------------------------------------------------|--------|------------|---------|------------|---------------|---------------------|---------------------|
|                                                                                             | Events | Total      | Events  | Total      |               | M-H, Random, 95% CI | M-H, Random, 95% CI |
| Miele 2009                                                                                  | 13     | 14         | 4       | 15         | 20.1%         | 3.48                | [1.49, 8.16]        |
| Sood 2009                                                                                   | 33     | 77         | 11      | 70         | 24.2%         | 2.73                | [1.50, 4.97]        |
| Tursi 2004                                                                                  | 21     | 30         | 24      | 30         | 28.6%         | 0.88                | [0.65, 1.17]        |
| Tursi 2010                                                                                  | 31     | 65         | 23      | 66         | 27.1%         | 1.37                | [0.90, 2.08]        |
| <b>Total (95% CI)</b>                                                                       |        | <b>186</b> |         | <b>181</b> | <b>100.0%</b> | <b>1.72</b>         | <b>[0.89, 3.32]</b> |
| Total events                                                                                | 98     |            | 62      |            |               |                     |                     |
| Heterogeneity: $\tau^2 = 0.37$ ; $\chi^2 = 21.92$ , $df = 3$ ( $P < 0.0001$ ); $I^2 = 86\%$ |        |            |         |            |               |                     |                     |
| Test for overall effect: $Z = 1.61$ ( $P = 0.11$ )                                          |        |            |         |            |               |                     |                     |

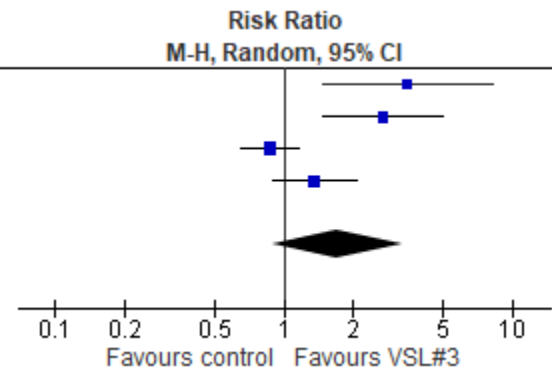

Clinical Response:

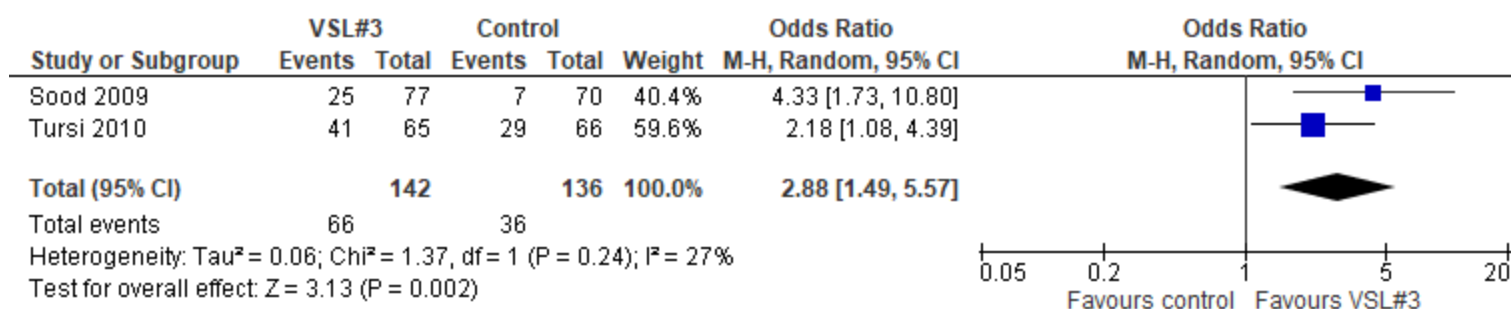

#### Adverse Events

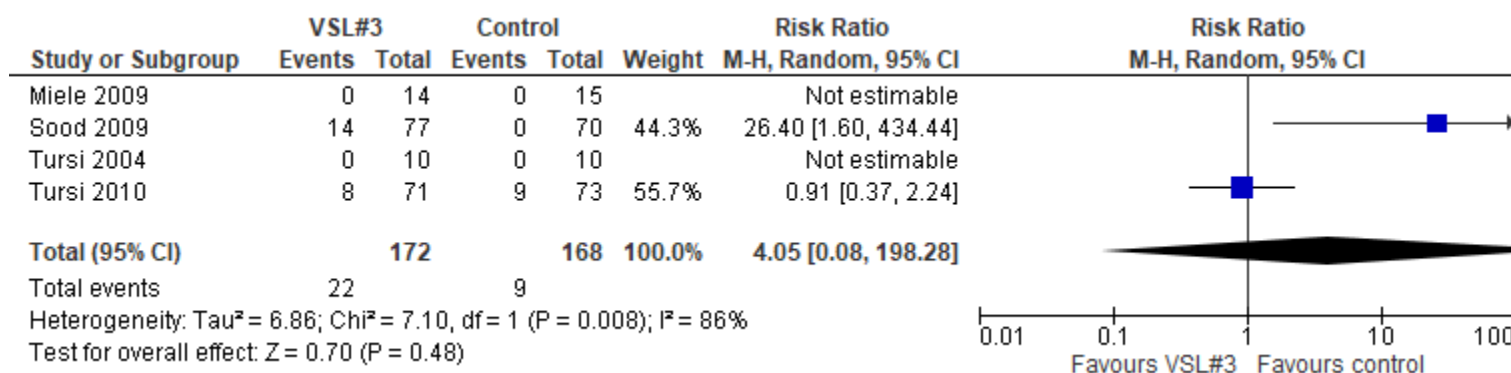

Question: *Bifidobacterium longum* Reuter ATCC BAA-999 compared to placebo in patients with ulcerative colitis (4d)

Bibliography: Tamaki 2016

| Certainty assessment |              |              |               |              |             |                      | No of patients                       |         | Effect            |                   | Certainty | Importance |
|----------------------|--------------|--------------|---------------|--------------|-------------|----------------------|--------------------------------------|---------|-------------------|-------------------|-----------|------------|
| No of studies        | Study design | Risk of bias | Inconsistency | Indirectness | Imprecision | Other considerations | <i>B. longum</i> Reuter ATCC BAA-999 | placebo | Relative (95% CI) | Absolute (95% CI) |           |            |

Clinical Remission (follow up: 8 weeks; assessed with: UCDAI ≤2)

|   |                   |                      |             |             |                           |      |               |               |                        |                                                   |                  |          |
|---|-------------------|----------------------|-------------|-------------|---------------------------|------|---------------|---------------|------------------------|---------------------------------------------------|------------------|----------|
| 1 | randomized trials | serious <sup>a</sup> | not serious | not serious | very serious <sup>b</sup> | none | 15/28 (53.6%) | 12/28 (42.9%) | RR 1.54 (0.54 to 4.42) | 231 more per 1,000 (from 197 fewer to 1,000 more) | ⊕○○○<br>VERY LOW | CRITICAL |
|---|-------------------|----------------------|-------------|-------------|---------------------------|------|---------------|---------------|------------------------|---------------------------------------------------|------------------|----------|

Serious Adverse Events

|   |                   |                      |             |             |                      |      |             |             |               |  |             |          |
|---|-------------------|----------------------|-------------|-------------|----------------------|------|-------------|-------------|---------------|--|-------------|----------|
| 1 | randomized trials | serious <sup>a</sup> | not serious | not serious | serious <sup>c</sup> | none | 0/24 (0.0%) | 0/23 (0.0%) | not estimable |  | ⊕⊕○○<br>LOW | CRITICAL |
|---|-------------------|----------------------|-------------|-------------|----------------------|------|-------------|-------------|---------------|--|-------------|----------|

CI: Confidence interval; RR: Risk ratio

## Explanations

- Tamaki 2016 has unclear allocation concealment, blinding of outcome assessor, and selective reporting of outcomes.
- The 95% CI includes the potential for both benefit and harm.
- No events reported out of a small sample.

Forest Plots

Clinical Remission

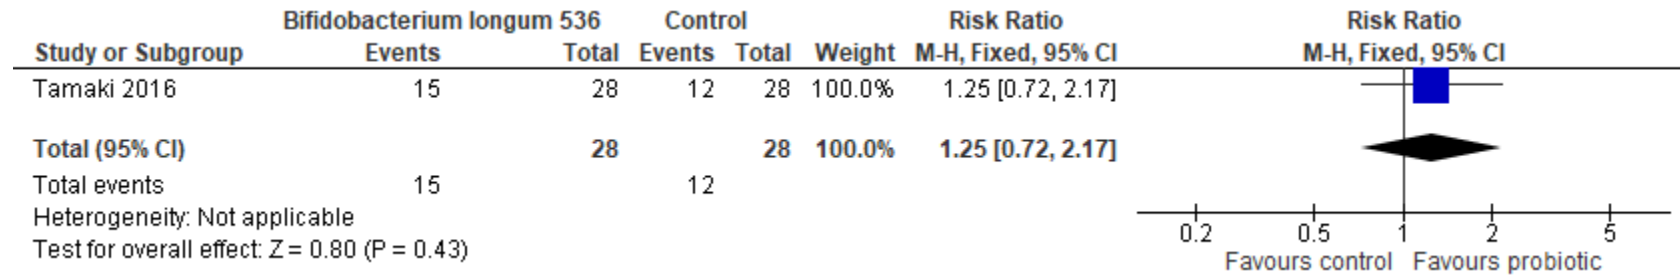

Question: *Escherichia coli* Nissle 1917 compared to placebo +/- mesalamine in patients with ulcerative colitis (4e)

Bibliography: Mallon 2011

| Certainty assessment |              |              |               |              |             |                      | № of patients              |                        | Effect            |                   | Certainty | Importance |
|----------------------|--------------|--------------|---------------|--------------|-------------|----------------------|----------------------------|------------------------|-------------------|-------------------|-----------|------------|
| № of studies         | Study design | Risk of bias | Inconsistency | Indirectness | Imprecision | Other considerations | <i>E. coli</i> Nissle 1917 | placebo +/- mesalamine | Relative (95% CI) | Absolute (95% CI) |           |            |

**Rate of relapse after successful induction<sup>a</sup>**

|   |                   |                        |             |             |                      |      |                 |                 |                                  |                                                       |             |          |
|---|-------------------|------------------------|-------------|-------------|----------------------|------|-----------------|-----------------|----------------------------------|-------------------------------------------------------|-------------|----------|
| 3 | randomized trials | serious <sup>b,c</sup> | not serious | not serious | serious <sup>d</sup> | none | 145/271 (53.5%) | 122/275 (44.4%) | <b>RR 1.20</b><br>(1.01 to 1.42) | <b>89 more per 1,000</b><br>(from 4 more to 186 more) | ⊕⊕○○<br>LOW | CRITICAL |
|---|-------------------|------------------------|-------------|-------------|----------------------|------|-----------------|-----------------|----------------------------------|-------------------------------------------------------|-------------|----------|

**Adverse events**

|   |                   |                          |             |                      |                           |      |                |                |                                  |                                                         |                   |          |
|---|-------------------|--------------------------|-------------|----------------------|---------------------------|------|----------------|----------------|----------------------------------|---------------------------------------------------------|-------------------|----------|
| 4 | randomized trials | serious <sup>b,c,d</sup> | not serious | serious <sup>d</sup> | very serious <sup>d</sup> | none | 90/296 (30.4%) | 86/300 (28.7%) | <b>RR 1.09</b><br>(0.86 to 1.38) | <b>26 more per 1,000</b><br>(from 40 fewer to 109 more) | ⊕○○○○<br>VERY LOW | CRITICAL |
|---|-------------------|--------------------------|-------------|----------------------|---------------------------|------|----------------|----------------|----------------------------------|---------------------------------------------------------|-------------------|----------|

**Remission at End of Study Period**

|   |                   |                        |                      |             |                           |      |               |               |                                  |                                                            |                   |          |
|---|-------------------|------------------------|----------------------|-------------|---------------------------|------|---------------|---------------|----------------------------------|------------------------------------------------------------|-------------------|----------|
| 2 | randomized trials | serious <sup>b,d</sup> | serious <sup>e</sup> | not serious | very serious <sup>f</sup> | none | 49/82 (59.8%) | 64/84 (76.2%) | <b>RR 0.86</b><br>(0.49 to 1.49) | <b>107 fewer per 1,000</b><br>(from 389 fewer to 373 more) | ⊕○○○○<br>VERY LOW | CRITICAL |
|---|-------------------|------------------------|----------------------|-------------|---------------------------|------|---------------|---------------|----------------------------------|------------------------------------------------------------|-------------------|----------|

CI: Confidence interval; RR: Risk ratio

## Explanations

- a. Kruis 1997 defines relapse as CAI > 4; Kruis 2004 defines relapse as CAI > 6 or Endoscopic index > 4.
- b. Rembacken 1999 did not report on technique of randomization, allocation concealment unclear, and personnel blinded during the study not described. Additionally, overall withdrawal rates were 8.9% for Rembacken 1999. After study entry, patients received gentamicin 80 mg TID, which is not standard of care.
- c. Allocation concealment unclear for all studies, sequence generation unclear for Kruis 1997. Kruis 2004 reported high dropout rate (46.5%).
- d. In Petersen 2014, all patients received prednisone, which may confound the effects of patients receiving *E. coli* Nissle.
- e. Heterogeneity among studies ( $I^2$  79%)
- f. The 95% CI includes the potential for both benefit and harm. Few events reported do not meet the optimal information size and suggest fragility in the estimate.

### Forest Plots

#### Rate of Relapse After Successful Induction

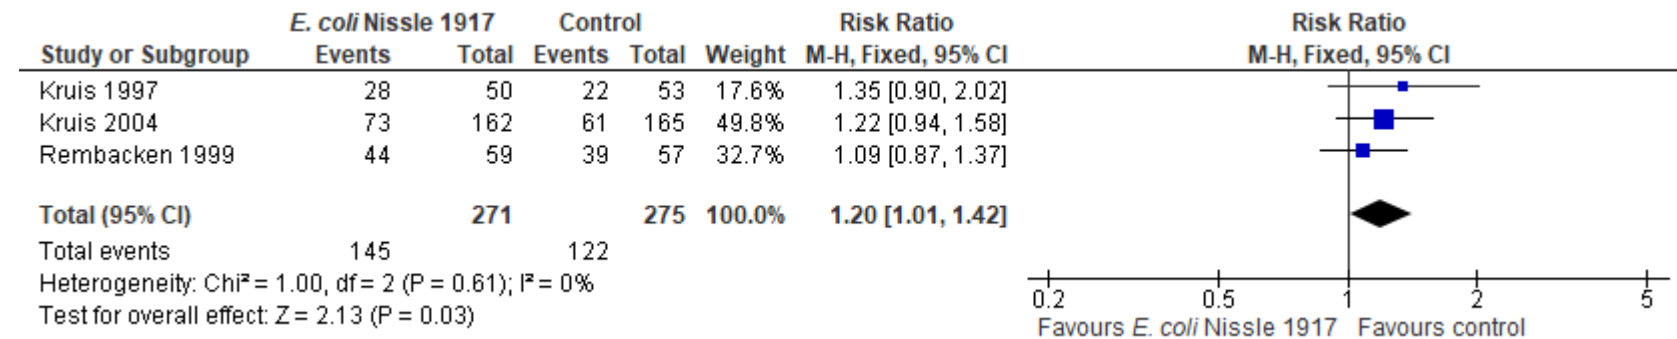

#### Remission at End of Study Period



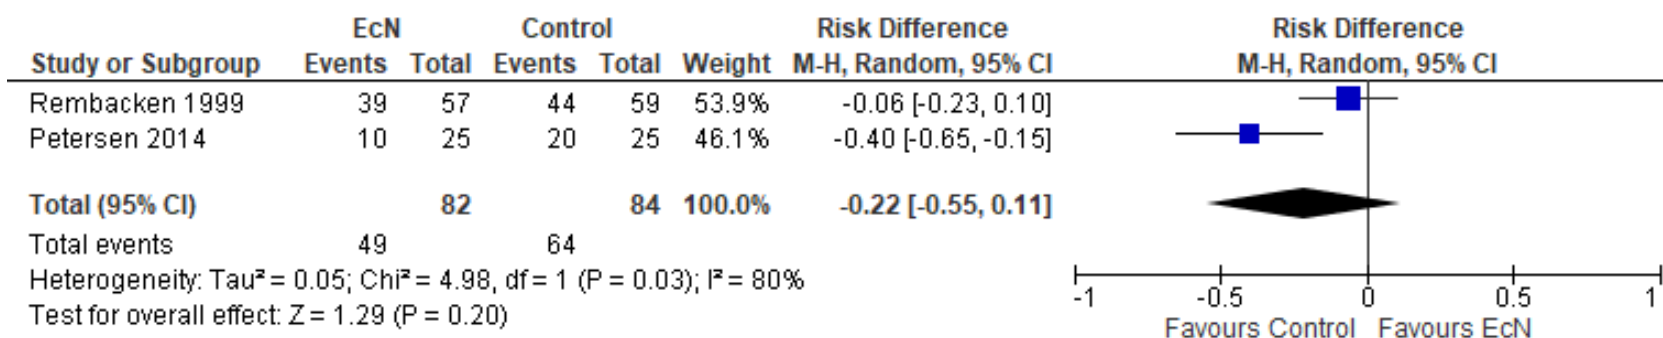

#### Adverse Events

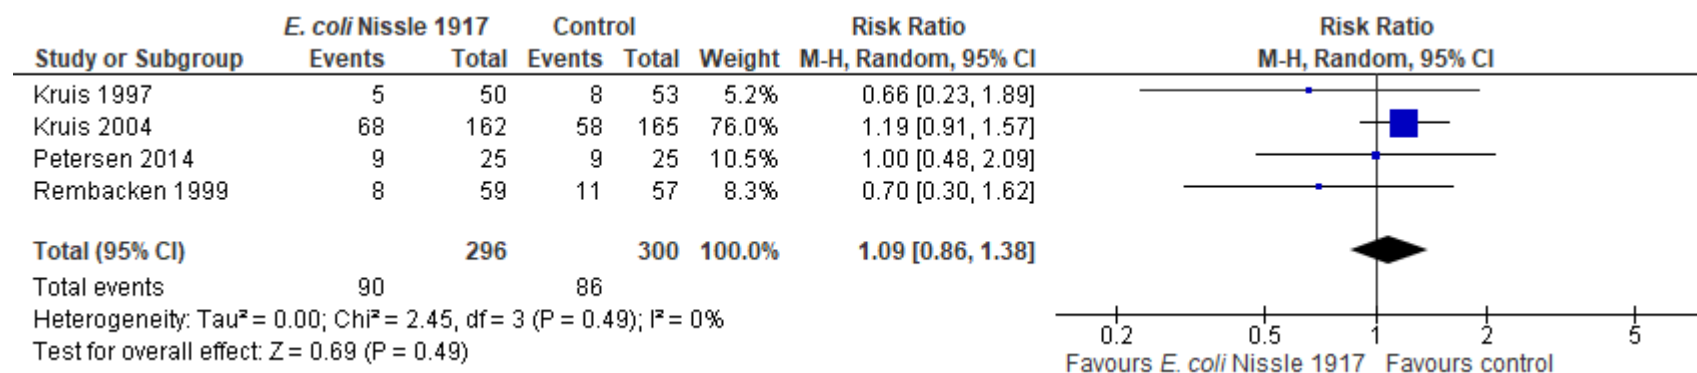

Question: *Lactobacillus rhamnosus* ATCC 53103 compared to mesalamine in patients with ulcerative colitis (4f)

Bibliography: Naidoo 2011

| Certainty assessment |              |              |               |              |             |                      | № of patients                  |            | Effect            |                   | Certainty | Importance |
|----------------------|--------------|--------------|---------------|--------------|-------------|----------------------|--------------------------------|------------|-------------------|-------------------|-----------|------------|
| № of studies         | Study design | Risk of bias | Inconsistency | Indirectness | Imprecision | Other considerations | <i>L. rhamnosus</i> ATCC 53103 | mesalamine | Relative (95% CI) | Absolute (95% CI) |           |            |

Relapse (follow up: range 12 weeks to 12 months; assessed with: clinical +/- endoscopic)<sup>a</sup>

|   |                   |                           |             |             |                      |      |               |               |                        |                                                 |                  |          |
|---|-------------------|---------------------------|-------------|-------------|----------------------|------|---------------|---------------|------------------------|-------------------------------------------------|------------------|----------|
| 1 | randomized trials | very serious <sup>b</sup> | not serious | not serious | serious <sup>c</sup> | none | 10/65 (15.4%) | 12/60 (20.0%) | RR 0.77 (0.36 to 1.65) | 46 fewer per 1,000 (from 128 fewer to 130 more) | ⊕○○○<br>VERY LOW | CRITICAL |
|---|-------------------|---------------------------|-------------|-------------|----------------------|------|---------------|---------------|------------------------|-------------------------------------------------|------------------|----------|

CI: Confidence interval; RR: Risk ratio

## Explanations

- Zocco 2006 defines relapse as CAI > 4.
- Allocation concealment unclear for all studies, sequence generation unclear for Zocco 2006, and Zocco 2006 study open label with no blinding.
- The 95% CI includes the potential for both benefit and harm.

Forest Plots

Relapse

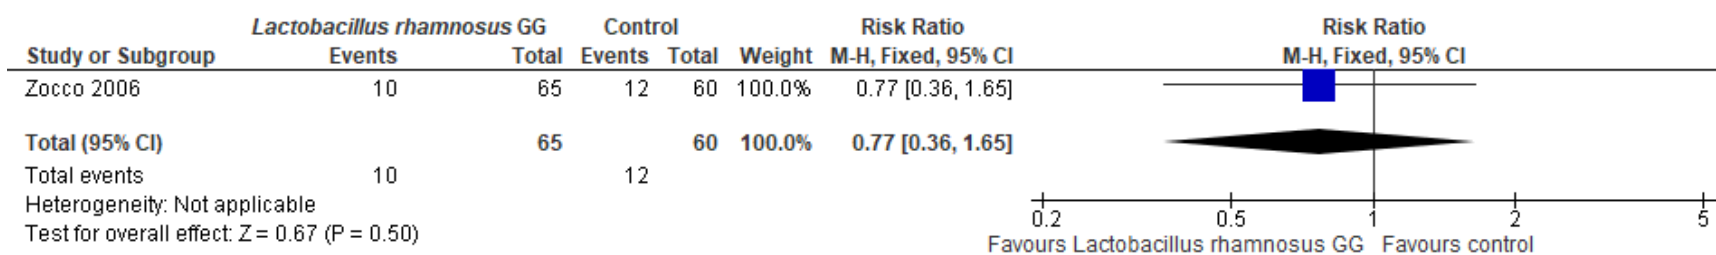

**Question:** *Lactobacillus reuteri* ATCC 55730 enema + meslamine compared to placebo + mesalamine in patients with ulcerative colitis (4g)

**Bibliography:** Oliva 2012

| Certainty assessment |              |              |               |              |             |                      | No of patients                                 |                      | Effect            |                   | Certainty | Importance |
|----------------------|--------------|--------------|---------------|--------------|-------------|----------------------|------------------------------------------------|----------------------|-------------------|-------------------|-----------|------------|
| No of studies        | Study design | Risk of bias | Inconsistency | Indirectness | Imprecision | Other considerations | <i>L. reuteri</i> ATCC 55730 enema + meslamine | placebo + mesalamine | Relative (95% CI) | Absolute (95% CI) |           |            |

**Clinical Response (follow up: 8 weeks; assessed with: reduction in the DAI of  $\geq 2$  points)**

|   |                   |                      |             |             |                      |      |                |              |                               |                                                        |             |          |
|---|-------------------|----------------------|-------------|-------------|----------------------|------|----------------|--------------|-------------------------------|--------------------------------------------------------|-------------|----------|
| 1 | randomized trials | serious <sup>a</sup> | not serious | not serious | serious <sup>b</sup> | none | 16/16 (100.0%) | 8/15 (53.3%) | <b>RR 1.83</b> (1.14 to 2.92) | <b>443 more per 1,000</b> (from 75 more to 1,000 more) | ⊕⊕○○<br>LOW | CRITICAL |
|---|-------------------|----------------------|-------------|-------------|----------------------|------|----------------|--------------|-------------------------------|--------------------------------------------------------|-------------|----------|

**Clinical Remission (follow up: 8 weeks; assessed with: DAI score of  $< 2.0$  points)**

|   |                   |                      |             |             |                      |      |              |             |                                  |                                                    |             |          |
|---|-------------------|----------------------|-------------|-------------|----------------------|------|--------------|-------------|----------------------------------|----------------------------------------------------|-------------|----------|
| 1 | randomized trials | serious <sup>a</sup> | not serious | not serious | serious <sup>b</sup> | none | 5/16 (31.3%) | 0/15 (0.0%) | <b>RR 10.35</b> (0.62 to 172.55) | <b>0 fewer per 1,000</b> (from 0 fewer to 0 fewer) | ⊕⊕○○<br>LOW | CRITICAL |
|---|-------------------|----------------------|-------------|-------------|----------------------|------|--------------|-------------|----------------------------------|----------------------------------------------------|-------------|----------|

CI: Confidence interval; RR: Risk ratio

## Explanations

a. Unclear blinding and selective reporting.

b. The 95% CI includes the potential for both benefit and harm. Few events reported do not meet the optimal information size and suggest fragility in the estimate.

Forest Plots

Clinical response

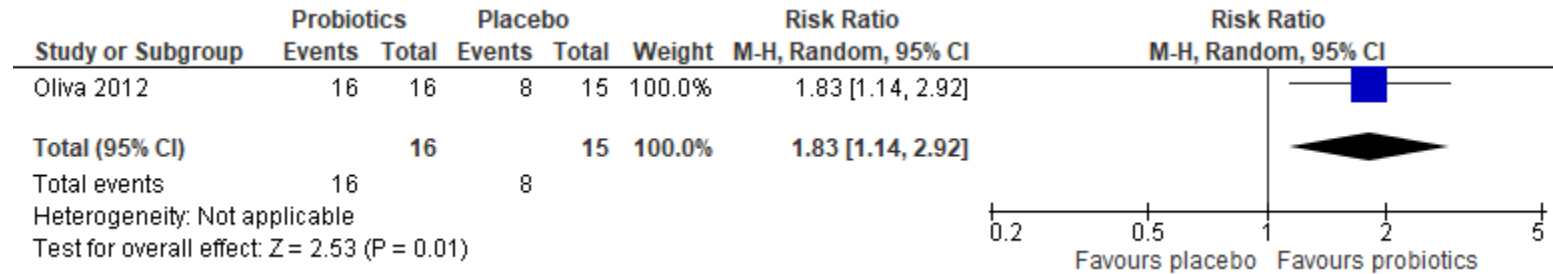

Clinical remission

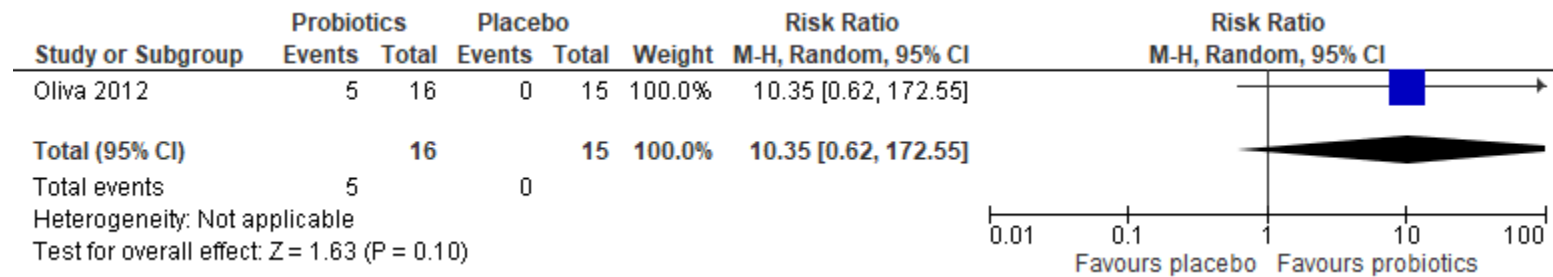

Question: *Lactobacillus acidophilus* LA-5 + *Bifidobacterium animalis* subsp. *lactis* Bb12 compared to placebo in patients with ulcerative colitis (4h)

Bibliography: Naidoo 2011

| Certainty assessment |              |              |               |              |             |                      | № of patients                                                             |         | Effect            |                   | Certainty | Importance |
|----------------------|--------------|--------------|---------------|--------------|-------------|----------------------|---------------------------------------------------------------------------|---------|-------------------|-------------------|-----------|------------|
| № of studies         | Study design | Risk of bias | Inconsistency | Indirectness | Imprecision | Other considerations | <i>L. acidophilus</i> LA-5 + <i>B. animalis</i> subsp. <i>lactis</i> Bb12 | Placebo | Relative (95% CI) | Absolute (95% CI) |           |            |

Relapse (follow up: 12 months; assessed with: SCCAI score > 4 +/- histological changes)

|   |                   |                          |             |             |                           |      |               |               |                      |                                                 |             |          |
|---|-------------------|--------------------------|-------------|-------------|---------------------------|------|---------------|---------------|----------------------|-------------------------------------------------|-------------|----------|
| 1 | randomized trials | not serious <sup>a</sup> | not serious | not serious | very serious <sup>b</sup> | none | 15/20 (75.0%) | 11/12 (91.7%) | RR 0.82(0.6 to 1.11) | 165 fewer per 1,000 (from 367 fewer to 101more) | ⊕⊕○○<br>LOW | CRITICAL |
|---|-------------------|--------------------------|-------------|-------------|---------------------------|------|---------------|---------------|----------------------|-------------------------------------------------|-------------|----------|

CI: Confidence interval; OR: Odds ratio

## Explanations

a. Unclear allocation concealment reported for Wildt 2011.

b. The 95% CI includes the potential for both benefit and harm. Few events reported do not meet the optimal information size and suggest fragility in the estimate.

Forest Plots

Relapse

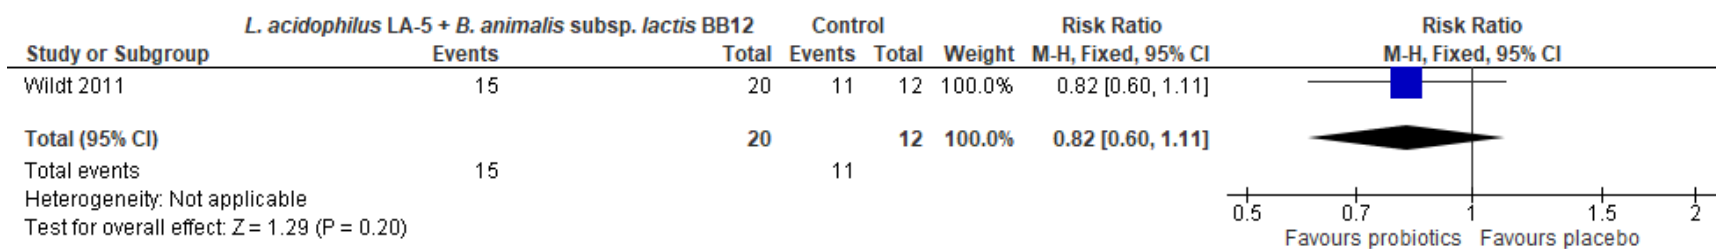

Question: *Enterococcus faecalis* T-110 + *Clostridium butyricum* TO-A + *Bacillus mesentericus* TO-A compared to placebo in patients with ulcerative colitis (4i)

Bibliography: Yoshimatsu 2015

| Certainty assessment |              |              |               |              |             |                      | № of patients                                                                     |         | Effect            |                   | Certainty | Importance |
|----------------------|--------------|--------------|---------------|--------------|-------------|----------------------|-----------------------------------------------------------------------------------|---------|-------------------|-------------------|-----------|------------|
| № of studies         | Study design | Risk of bias | Inconsistency | Indirectness | Imprecision | Other considerations | <i>E. faecalis</i> T-110 + <i>C. butyricum</i> TO-A + <i>B. mesentericus</i> TO-A | Placebo | Relative (95% CI) | Absolute (95% CI) |           |            |

Clinical Remission (follow up: 12 months)

|   |                   |                      |             |             |                      |      |               |               |                        |                                                |             |          |
|---|-------------------|----------------------|-------------|-------------|----------------------|------|---------------|---------------|------------------------|------------------------------------------------|-------------|----------|
| 1 | randomized trials | serious <sup>a</sup> | not serious | not serious | serious <sup>b</sup> | none | 16/23 (69.6%) | 12/23 (52.2%) | RR 1.33 (0.83 to 2.15) | 172 more per 1,000 (from 89 fewer to 600 more) | ⊕⊕○○<br>LOW | CRITICAL |
|---|-------------------|----------------------|-------------|-------------|----------------------|------|---------------|---------------|------------------------|------------------------------------------------|-------------|----------|

CI: Confidence interval; RR: Risk ratio

## Explanations

a. Unclear risk of allocation concealment, blinding, and selective reporting.

b. The 95% CI includes the potential for both benefit and harm. Few events reported do not meet the optimal information size and suggest fragility in the estimate.

Forest Plots

Clinical remission



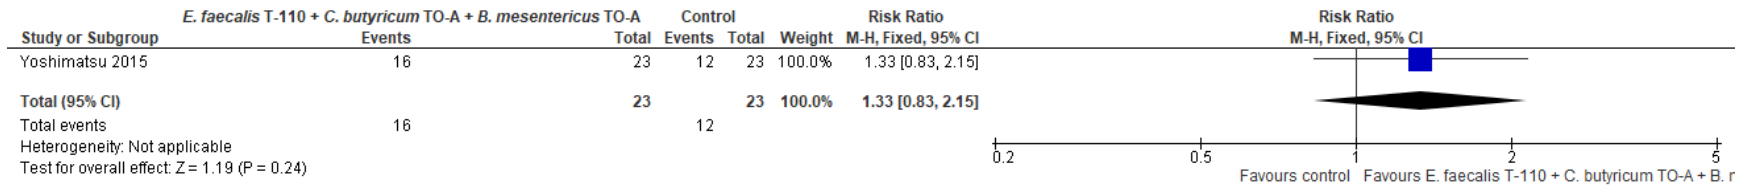

## Appendix 5: Should probiotics be used in patients with pouchitis?

### Bibliography

Included in: Singh S, Stroud AM, Holubar SD, Sandborn WJ, Pardi DS. Treatment and prevention of pouchitis after ileal pouch-anal anastomosis for chronic ulcerative colitis. *Cochrane Database Syst Rev* 2015:CD001176.

Brown SJ, Megan J, Smith S, Matchet D, Elliott R. Bifidobacterium longum BB-536 and prevention of acute pouchitis. *Gastroenterology* 2004;126:S465.

Gionchetti P, Rizzello F, Venturi A, et al. Oral bacteriotherapy as maintenance treatment in patients with chronic pouchitis: a double-blind, placebo-controlled trial. *Gastroenterology* 2000;119:305-9.

Gionchetti P, Rizzello F, Helwig U, et al. Prophylaxis of pouchitis onset with probiotic therapy: a double-blind, placebo-controlled trial. *Gastroenterology* 2003;124:1202-9.

Kuisma J, Mentula S, Jarvinen H, Kahri A, Saxelin M, Farkkila M. Effect of Lactobacillus rhamnosus GG on ileal pouch inflammation and microbial flora. *Aliment Pharmacol Ther* 2003;17:509-15.

Mimura T, Rizzello F, Helwig U, et al. Once daily high dose probiotic therapy (VSL#3) for maintaining remission in recurrent or refractory pouchitis. *Gut* 2004;53:108-14.

Pronio A, Montesani C, Butteroni C, et al. Probiotic administration in patients with ileal pouch-anal anastomosis for ulcerative colitis is associated with expansion of mucosal regulatory cells. *Inflamm Bowel Dis* 2008;14:662-8.

Yasueda A, Mizushima T, Nezu R, et al. The effect of Clostridium butyricum MIYAIRI on the prevention of pouchitis and alteration of the microbiota profile in patients with ulcerative colitis. *Surg Today* 2016;46:939-49.

**Question:** *Lactobacillus paracasei* subsp. *paracasei* + *Lactobacillus plantarum* + *Lactobacillus acidophilus* + *Lactobacillus delbrueckii* subsp. *bulgaricus* + *Bifidobacterium longum* subsp. *longum* + *Bifidobacterium breve* + *B. longum* subsp. *infantis* + *Streptococcus salivarius* subsp. *thermophilus* compared to placebo / standard of care in patients with pouchitis (5a)

**Bibliography:** Gionchetti 2000, Gionchetti 2003, Mimura 2004, Pronio 2008

| Certainty assessment |              |              |               |              |             |                                                                                                                                                                                                                                                                                                  | № of patients              |  | Effect            |                   | Certainty | Importance |
|----------------------|--------------|--------------|---------------|--------------|-------------|--------------------------------------------------------------------------------------------------------------------------------------------------------------------------------------------------------------------------------------------------------------------------------------------------|----------------------------|--|-------------------|-------------------|-----------|------------|
| № of studies         | Study design | Risk of bias | Inconsistency | Indirectness | Imprecision | Other considerations                                                                                                                                                                                                                                                                             | Placebo / standard of care |  | Relative (95% CI) | Absolute (95% CI) |           |            |
|                      |              |              |               |              |             | <i>L. paracasei</i> subsp. <i>paracasei</i> + <i>L. plantarum</i> + <i>L. acidophilus</i> + <i>L. delbrueckii</i> subsp. <i>bulgaricus</i> + <i>B. longum</i> subsp. <i>longum</i> + <i>B. breve</i> + <i>B. longum</i> subsp. <i>infantis</i> + <i>S. salivarius</i> subsp. <i>thermophilus</i> |                            |  |                   |                   |           |            |

**Maintenance of Remission**

|   |                   |             |             |             |                           |      |               |             |                                    |                                                           |             |          |
|---|-------------------|-------------|-------------|-------------|---------------------------|------|---------------|-------------|------------------------------------|-----------------------------------------------------------|-------------|----------|
| 2 | randomised trials | not serious | not serious | not serious | very serious <sup>a</sup> | none | 34/40 (85.0%) | 1/36 (2.8%) | <b>RR 20.24</b><br>(4.28 to 95.81) | <b>534 more per 1,000</b><br>(from 91 more to 1,000 more) | ⊕⊕○○<br>LOW | CRITICAL |
|---|-------------------|-------------|-------------|-------------|---------------------------|------|---------------|-------------|------------------------------------|-----------------------------------------------------------|-------------|----------|

| Certainty assessment |              |              |               |              |             |                      | № of patients                                                                                                                                                                                                                                                                                    |                            | Effect            |                   | Certainty | Importance |
|----------------------|--------------|--------------|---------------|--------------|-------------|----------------------|--------------------------------------------------------------------------------------------------------------------------------------------------------------------------------------------------------------------------------------------------------------------------------------------------|----------------------------|-------------------|-------------------|-----------|------------|
| № of studies         | Study design | Risk of bias | Inconsistency | Indirectness | Imprecision | Other considerations | <i>L. paracasei</i> subsp. <i>paracasei</i> + <i>L. plantarum</i> + <i>L. acidophilus</i> + <i>L. delbrueckii</i> subsp. <i>bulgaricus</i> + <i>B. longum</i> subsp. <i>longum</i> + <i>B. breve</i> + <i>B. longum</i> subsp. <i>infantis</i> + <i>S. salivarius</i> subsp. <i>thermophilus</i> | Placebo / standard of care | Relative (95% CI) | Absolute (95% CI) |           |            |

#### Adverse Events

|   |                   |             |             |             |                           |      |             |             |                                   |                                                         |             |          |
|---|-------------------|-------------|-------------|-------------|---------------------------|------|-------------|-------------|-----------------------------------|---------------------------------------------------------|-------------|----------|
| 2 | randomised trials | not serious | not serious | not serious | very serious <sup>a</sup> | none | 1/40 (2.5%) | 0/36 (0.0%) | <b>RR 2.43</b><br>(0.11 to 55.89) | <b>25 more per 1,000</b><br>(from 23 fewer to 73 fewer) | ⊕⊕○○<br>LOW | CRITICAL |
|---|-------------------|-------------|-------------|-------------|---------------------------|------|-------------|-------------|-----------------------------------|---------------------------------------------------------|-------------|----------|

#### No Episodes of Acute Pouchitis

|   |                   |                      |             |                          |                           |      |               |               |                                  |                                                         |                   |           |
|---|-------------------|----------------------|-------------|--------------------------|---------------------------|------|---------------|---------------|----------------------------------|---------------------------------------------------------|-------------------|-----------|
| 2 | randomised trials | serious <sup>b</sup> | not serious | not serious <sup>c</sup> | very serious <sup>a</sup> | none | 34/36 (94.4%) | 23/32 (71.9%) | <b>RR 1.29</b><br>(1.03 to 1.61) | <b>208 more per 1,000</b><br>(from 22 more to 438 more) | ⊕○○○○<br>VERY LOW | IMPORTANT |
|---|-------------------|----------------------|-------------|--------------------------|---------------------------|------|---------------|---------------|----------------------------------|---------------------------------------------------------|-------------------|-----------|

CI: Confidence interval; RR: Risk ratio

## Explanations

- a. Few events reported do not meet the optimal information size and suggest fragility in the estimate.
- b. Pronio 2008 is an open-label trial of probiotics versus no treatment.
- c. The pooled studies feature different comparisons: Pronio 2008 compares probiotics against no treatment and Gionchetti 2003 compares probiotics against placebo.

### Forest Plots

#### Maintenance of Remission

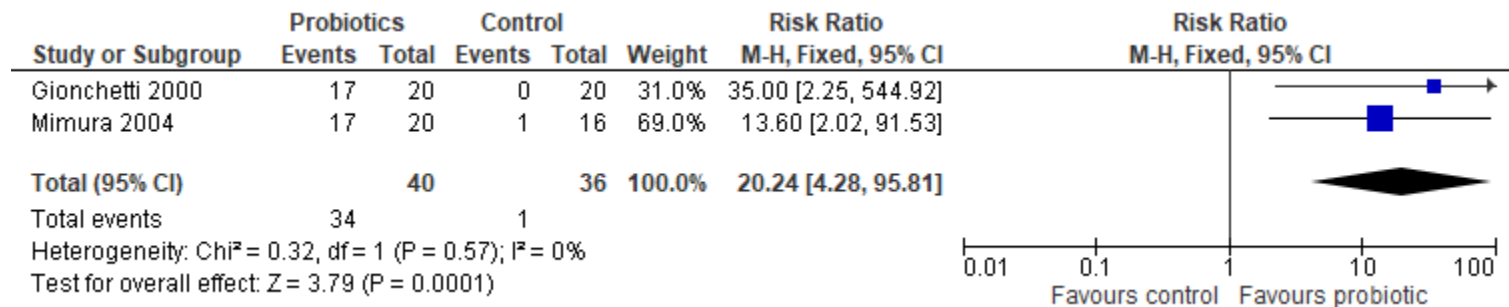

#### Adverse Events

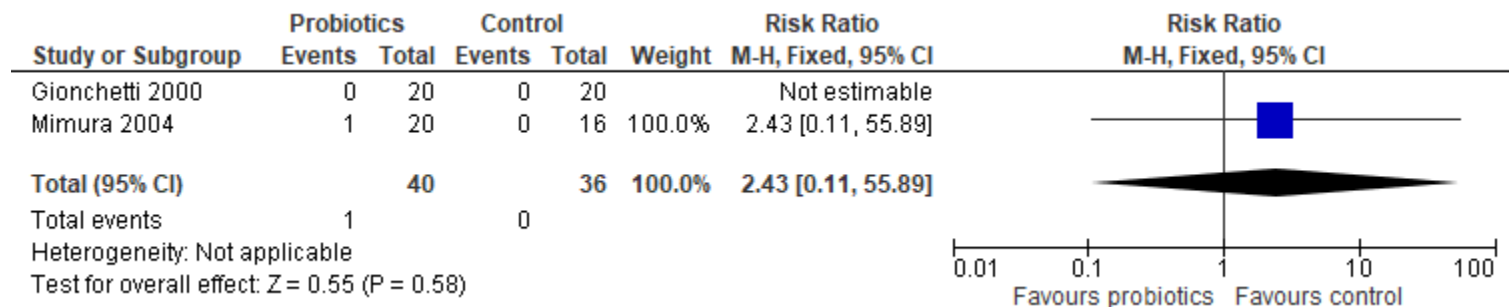

### No Episodes of Pouchitis

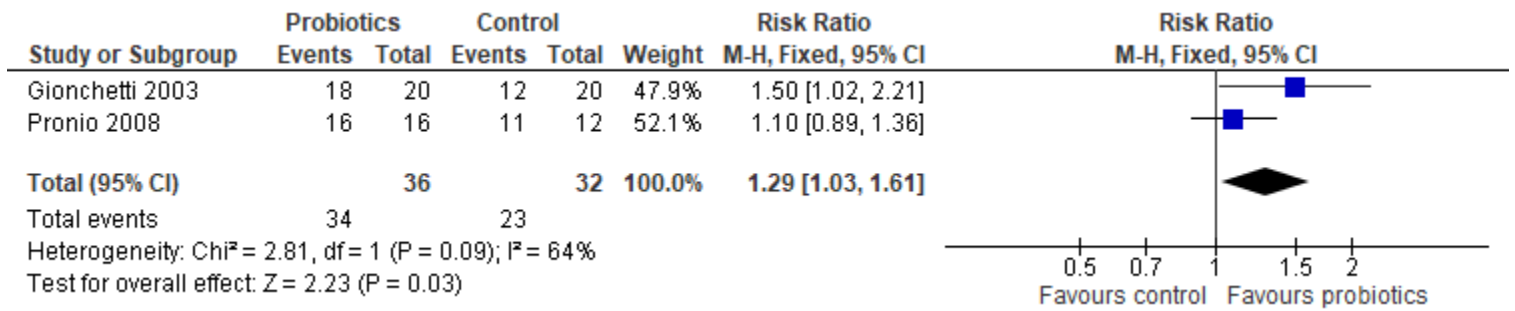

Question: *Lactobacillus rhamnosus* ATCC 53103 compared to placebo in patients with pouchitis (5b)

Bibliography: Singh 2015

| Certainty assessment |              |              |               |              |             |                      | № of patients                  |         | Effect            |                   | Certainty | Importance |
|----------------------|--------------|--------------|---------------|--------------|-------------|----------------------|--------------------------------|---------|-------------------|-------------------|-----------|------------|
| № of studies         | Study design | Risk of bias | Inconsistency | Indirectness | Imprecision | Other considerations | <i>L. rhamnosus</i> ATCC 53103 | Placebo | Relative (95% CI) | Absolute (95% CI) |           |            |

**Clinical Improvement**

|   |                   |                      |             |             |                           |      |              |             |                                   |                                                       |                  |          |
|---|-------------------|----------------------|-------------|-------------|---------------------------|------|--------------|-------------|-----------------------------------|-------------------------------------------------------|------------------|----------|
| 1 | randomised trials | serious <sup>a</sup> | not serious | not serious | very serious <sup>b</sup> | none | 1/10 (10.0%) | 0/10 (0.0%) | <b>RR 3.00</b><br>(0.14 to 65.90) | <b>0 fewer per 1,000</b><br>(from 0 fewer to 0 fewer) | ⊕○○○<br>VERY LOW | CRITICAL |
|---|-------------------|----------------------|-------------|-------------|---------------------------|------|--------------|-------------|-----------------------------------|-------------------------------------------------------|------------------|----------|

CI: Confidence interval; RR: Risk ratio

## Explanations

- a. Kuisma 2003 had unclear risk of bias for random sequence generation and allocation concealment.
- b. Few events reported do not meet the optimal information size and suggest fragility in the estimate.

Forest Plots

Clinical Improvement

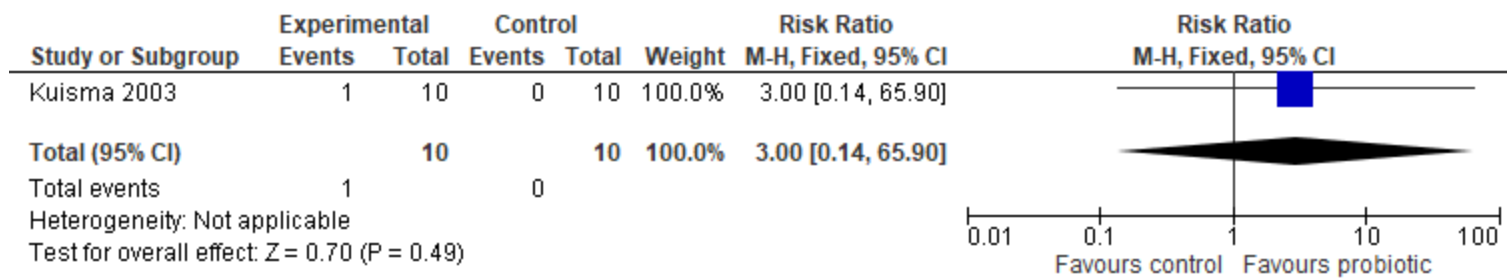



Question: *Clostridium butyricum* CBM 588 compared to placebo in patients with pouchitis (5c)

Bibliography: Yasueda 2016

| Certainty assessment |              |              |               |              |             |                      | № of patients               |         | Effect            |                   | Certainty | Importance |
|----------------------|--------------|--------------|---------------|--------------|-------------|----------------------|-----------------------------|---------|-------------------|-------------------|-----------|------------|
| № of studies         | Study design | Risk of bias | Inconsistency | Indirectness | Imprecision | Other considerations | <i>C. butyricum</i> CBM 588 | Placebo | Relative (95% CI) | Absolute (95% CI) |           |            |

Relapse (follow up: 24 months)

|   |                   |                      |             |             |                           |      |             |             |                                  |                                                            |                  |          |
|---|-------------------|----------------------|-------------|-------------|---------------------------|------|-------------|-------------|----------------------------------|------------------------------------------------------------|------------------|----------|
| 1 | randomised trials | serious <sup>a</sup> | not serious | not serious | very serious <sup>b</sup> | none | 1/9 (11.1%) | 4/8 (50.0%) | <b>RR 0.22</b><br>(0.03 to 1.60) | <b>390 fewer per 1,000</b><br>(from 485 fewer to 300 more) | ⊕○○○<br>VERY LOW | CRITICAL |
|---|-------------------|----------------------|-------------|-------------|---------------------------|------|-------------|-------------|----------------------------------|------------------------------------------------------------|------------------|----------|

Treatment-related Adverse Events

|   |                   |                      |             |             |                           |      |            |            |               |  |                  |          |
|---|-------------------|----------------------|-------------|-------------|---------------------------|------|------------|------------|---------------|--|------------------|----------|
| 1 | randomised trials | serious <sup>a</sup> | not serious | not serious | very serious <sup>b</sup> | none | 0/9 (0.0%) | 0/8 (0.0%) | not estimable |  | ⊕○○○<br>VERY LOW | CRITICAL |
|---|-------------------|----------------------|-------------|-------------|---------------------------|------|------------|------------|---------------|--|------------------|----------|

CI: Confidence interval; RR: Risk ratio

## Explanations

- Unclear risk of blinding, random sequence generation and allocation concealment.
- Few events reported do not meet the optimal information size and suggest fragility in the estimate.

Forest Plots

Relapse

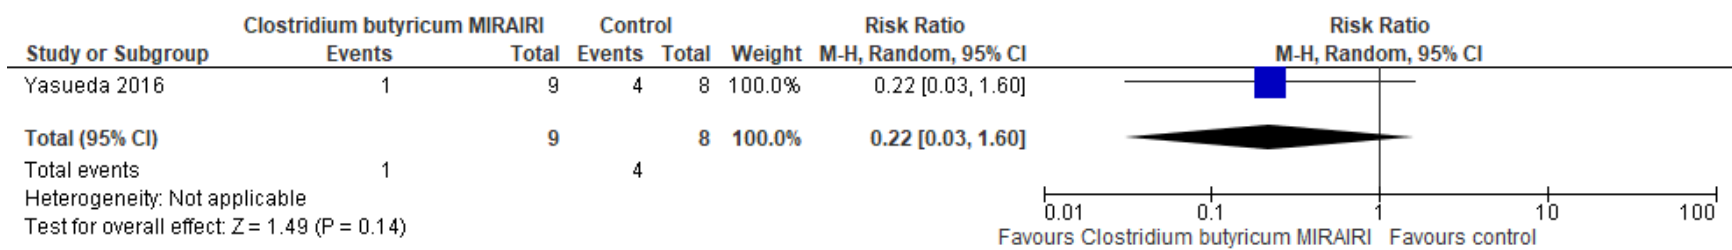

Question: *Bifidobacterium longum* subsp. *longum* compared to placebo in patients with pouchitis (5d)

Bibliography: Singh 2015

| Certainty assessment |              |              |               |              |             |                      | № of patients                         |         | Effect            |                   | Certainty | Importance |
|----------------------|--------------|--------------|---------------|--------------|-------------|----------------------|---------------------------------------|---------|-------------------|-------------------|-----------|------------|
| № of studies         | Study design | Risk of bias | Inconsistency | Indirectness | Imprecision | Other considerations | <i>B. longum</i> subsp. <i>longum</i> | placebo | Relative (95% CI) | Absolute (95% CI) |           |            |

**No Episodes of Pouchitis**

|   |                   |                      |             |             |                           |      |             |             |                                  |                                                             |                  |          |
|---|-------------------|----------------------|-------------|-------------|---------------------------|------|-------------|-------------|----------------------------------|-------------------------------------------------------------|------------------|----------|
| 1 | randomised trials | serious <sup>a</sup> | not serious | not serious | very serious <sup>b</sup> | none | 6/7 (85.7%) | 3/5 (60.0%) | <b>RR 1.43</b><br>(0.66 to 3.11) | <b>258 more per 1,000</b><br>(from 204 fewer to 1,000 more) | ⊕○○○<br>VERY LOW | CRITICAL |
|---|-------------------|----------------------|-------------|-------------|---------------------------|------|-------------|-------------|----------------------------------|-------------------------------------------------------------|------------------|----------|

CI: Confidence interval; RR: Risk ratio

## Explanations

- a. Brown 2004 has unclear risk for random sequence generation, allocation concealment.
- b. The 95% CI includes the potential for both benefit and harm. Few events reported do not meet the optimal information size and suggest fragility in the estimate.

Forest Plots

No episodes of pouchitis

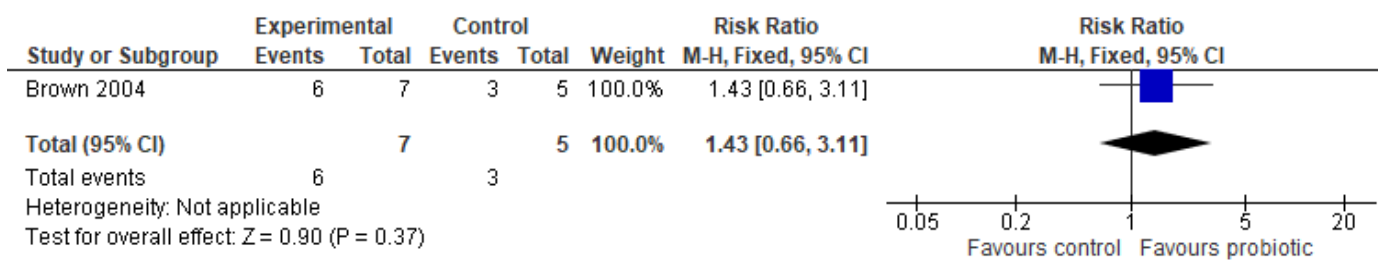

## Appendix 6: Should probiotics be used to improve global response or abdominal pain severity in symptomatic children and adults with irritable bowel syndrome?

### Bibliography

O'Sullivan M, O'Morain C. Bacterial supplementation in the irritable bowel syndrome. A randomised double-blind placebo-controlled crossover study. *Digestive and liver disease* 2000:294-301.

Niedzielin K, Kordecki H, Birkenfeld B. A controlled, double-blind, randomized study on the efficacy of *Lactobacillus plantarum* 299V in patients with irritable bowel syndrome. *European journal of gastroenterology & hepatology* 2001:1143-7.

Kim H, Camilleri M, McKinzie S, et al. A randomized controlled trial of a probiotic, VSL#3, on gut transit and symptoms in diarrhoea-predominant irritable bowel syndrome. *Alimentary pharmacology & therapeutics* 2003:895-904.

Bauserman M, Michail S. The use of *Lactobacillus GG* in irritable bowel syndrome in children: a double-blind randomized control trial. *Journal of pediatrics* 2005:197-201.

Kajander K, Hatakka K, Poussa T, Farkkila M, Korpela R. A probiotic mixture alleviates symptoms in irritable bowel syndrome patients: A controlled 6-month intervention. *Alimentary Pharmacology and Therapeutics* 2005;22:387-94.

Kim H, Vazquez RM, Camilleri M, et al. A randomized controlled trial of a probiotic combination VSL# 3 and placebo in irritable bowel syndrome with bloating. *Neurogastroenterology and motility* 2005:687-96.

Gawronska A, Dziechciarz P, Horvath A, Szajewska H. A randomized double-blind placebo-controlled trial of *Lactobacillus GG* for abdominal pain disorders in children. *Alimentary Pharmacology and Therapeutics* 2007;25:177-84.

Guyonnet D, Chassany O, Ducrotte P, et al. Effect of a fermented milk containing *Bifidobacterium animalis* DN-173 010 on the health-related quality of life and symptoms in irritable bowel syndrome in adults in primary care: a multicentre, randomized, double-blind, controlled trial. *Alimentary pharmacology & therapeutics* 2007:475-86.

Drouault-Holowacz S, Bieuelet S, Burckel A, Cazaubiel M, Dray X, Marteau P. A double blind randomized controlled trial of a probiotic combination in 100 patients with irritable bowel syndrome. *Gastroenterologie clinique et biologique* 2008:147-52.

Sinn D, Song J, Kim H, et al. Therapeutic effect of *Lactobacillus acidophilus*-SDC 2012, 2013 in patients with irritable bowel syndrome. *Digestive diseases and sciences* 2008:2714-8.

Zeng J, Li Y, Zuo X, Zhen Y, Yang J, Liu C. Clinical trial: effect of active lactic acid bacteria on mucosal barrier function in patients with diarrhoea-predominant irritable bowel syndrome. *Alimentary pharmacology & therapeutics* 2008:994-1002.

Enck P, Zimmermann K, Menke G, Klosterhalfen S. Randomized controlled treatment trial of irritable bowel syndrome with a probiotic E.-coli preparation (DSM17252) compared to placebo. *Zeitschrift fur gastroenterologie* 2009:209-14.

Williams E, Stimpson J, Wang D, et al. Clinical trial: a multistrain probiotic preparation significantly reduces symptoms of irritable bowel syndrome in a double-blind placebo-controlled study. *Alimentary pharmacology & therapeutics* 2009:97-103.

Francavilla R, Miniello V, Magistà A, et al. A randomized controlled trial of Lactobacillus GG in children with functional abdominal pain. *Pediatrics* 2010:e1445-52.

Guandalini S, Magazzu G, Chiaro A, et al. VSL#3 improves symptoms in children with irritable bowel Syndrome: A multicenter, randomized, placebo-controlled, double-blind, crossover study. *Journal of Pediatric Gastroenterology and Nutrition* 2010;51:24-30.

Simrén M, Ohman L, Olsson J, et al. Clinical trial: the effects of a fermented milk containing three probiotic bacteria in patients with irritable bowel syndrome - a randomized, double-blind, controlled study. *Alimentary pharmacology & therapeutics* 2010:218-27.

Choi C, Jo S, Park H, Chang S, Byeon J, Myung S. A randomized, double-blind, placebo-controlled multicenter trial of saccharomyces boulardii in irritable bowel syndrome: effect on quality of life. *Journal of clinical gastroenterology* 2011:679-83.

Guglielmetti S, Mora D, Gschwender M, Popp K. Randomised clinical trial: bifidobacterium bifidum MIMBb75 significantly alleviates irritable bowel syndrome and improves quality of life--a double-blind, placebo-controlled study. *Alimentary pharmacology & therapeutics* 2011:1123-32.

Hong KS, Kang HW, Im JP, et al. Effect of probiotics on symptoms in korean adults with irritable bowel syndrome. *Gut Liver* 2009;3:101-7.

Kabir M, Ishaque S, Ali M, Mahmuduzzaman M, Hasan M. Role of Saccharomyces boulardii in diarrhea predominant irritable bowel syndrome. *Mymensingh medical journal : MMJ* 2011:397-401.

Michail S, Kenche H. Gut Microbiota is Not Modified by Randomized, Double-Blind, Placebo-Controlled Trial of VSL#3 in Diarrhea-Predominant Irritable Bowel Syndrome. *Probiotics and Antimicrobial Proteins* 2011;3:1-7.

Ringel-Kulka T, Palsson O, Maier D, et al. Probiotic bacteria Lactobacillus acidophilus NCFM and Bifidobacterium lactis Bi-07 versus placebo for the symptoms of bloating in patients with functional bowel disorders: a double-blind study. *Journal of clinical gastroenterology* 2011:518-25.

Cui S, Hu Y. Multistrain probiotic preparation significantly reduces symptoms of irritable bowel syndrome in a double-blind placebo-controlled study. *International journal of clinical and experimental medicine* 2012:238-44.

Dapoigny M, Piche T, Ducrotte P, Linaud B, Cardot J, Bernalier-Donadille A. Efficacy and safety profile of LCR35 complete freeze-dried culture in irritable bowel syndrome: a randomized, double-blind study. *World journal of gastroenterology* 2012;2067-75.

Ducrotté P, Sawant P, Jayanthi V. Clinical trial: lactobacillus plantarum 299v (DSM 9843) improves symptoms of irritable bowel syndrome. *World journal of gastroenterology* 2012;4012-8.

Ki CB, Mun JS, Hwan CC, et al. The effect of a multispecies probiotic mixture on the symptoms and fecal microbiota in diarrhea-dominant irritable bowel syndrome: a randomized, double-blind, placebo-controlled trial. *Journal of clinical gastroenterology* 2012;220-7.

Kruis W, Chrubasik S, Boehm S, Stange C, Schulze J. A double-blind placebo-controlled trial to study therapeutic effects of probiotic Escherichia coli Nissle 1917 in subgroups of patients with irritable bowel syndrome. *International journal of colorectal disease* 2012;467-74.

Murakami K, Habukawa C, Nobuta Y, Moriguchi N, Takemura T. The effect of Lactobacillus brevis KB290 against irritable bowel syndrome: a placebo-controlled double-blind crossover trial. *Biopsychosocial medicine* 2012;16.

Amirimani B, Nikfam S, Albaji M, et al. Probiotic vs. Placebo in Irritable Bowel Syndrome:A Randomized Controlled Trial. *Middle East Journal of Digestive Diseases* 2013;5:98-102.

Begtrup L, de MO, Kjeldsen J, Christensen R, Jarbøl D. Long-term treatment with probiotics in primary care patients with irritable bowel syndrome--a randomised, double-blind, placebo controlled trial. *Scandinavian journal of gastroenterology* 2013;1127-35.

Roberts L, McCahon D, Holder R, Wilson S, Hobbs F. A randomised controlled trial of a probiotic 'functional food' in the management of irritable bowel syndrome. *BMC gastroenterology* 2013;45.

Abbas Z, Yakoob J, Jafri W, et al. Cytokine and clinical response to Saccharomyces boulardii therapy in diarrhea-dominant irritable bowel syndrome: a randomized trial. *European journal of gastroenterology & hepatology* 2014;630-9.

Jafari E, Vahedi H, Merat S, Momtahn S, Riahi A. Therapeutic effects, tolerability and safety of a multi-strain probiotic in Iranian adults with irritable bowel syndrome and bloating. *Archives of Iranian Medicine* 2014;17:466-70.

Lorenzo-Zuniga V, Llop E, Suarez C, et al. I.31, a new combination of probiotics, improves irritable bowel syndrome-related quality of life. *World J Gastroenterol.* 2014;20:8709-16.

Ludidi S, Jonkers DM, Koning CJ, et al. Randomized clinical trial on the effect of a multispecies probiotic on visceroperception in hypersensitive IBS patients. *Neurogastroenterology and Motility* 2014;26:705-14.

Sisson G, Ayis S, Sherwood R, Bjarnason I. Randomised clinical trial: a liquid multi-strain probiotic vs. placebo in the irritable bowel syndrome--a 12 week double-blind study. *Alimentary pharmacology & therapeutics* 2014;51-62.

Stevenson C, Blaauw R, Fredericks E, Visser J, Roux S. Randomized clinical trial: effect of *Lactobacillus plantarum* 299 v on symptoms of irritable bowel syndrome. *Nutrition* 2014;1151-7.

Yoon JS, Sohn W, Lee OY, et al. Effect of multispecies probiotics on irritable bowel syndrome: A randomized, double-blind, placebo-controlled trial. *Journal of Gastroenterology and Hepatology* 2014;29:52-9.

Pineton dCG, Neut C, Chau A, et al. A randomized clinical trial of *Saccharomyces cerevisiae* versus placebo in the irritable bowel syndrome. *Digestive and liver disease* 2015;119-24.

Yoon H, Park YS, Lee DH, Seo JG, Shin CM, Kim N. Effect of administering a multi-species probiotic mixture on the change in facial microbiota and symptoms of irritable bowel syndrome: A randomized, double-blind, placebo-controlled trial. *Journal of Clinical Biochemistry and Nutrition* 2015;57:129-34.

Majeed M, Nagabhushanam K, Natarajan S, et al. *Bacillus coagulans* MTCC 5856 supplementation in the management of diarrhea predominant Irritable Bowel Syndrome: a double blind randomized placebo controlled pilot clinical study. *Nutrition journal* 2016;15:21.

Spiller R, Pelerin F, Cayzeele DA, et al. Randomized double blind placebo-controlled trial of *Saccharomyces cerevisiae* CNCM I-3856 in irritable bowel syndrome: improvement in abdominal pain and bloating in those with predominant constipation. *United european gastroenterology journal* 2016;353-62.

Thijssen A, Clemens C, Vankerckhoven V, Goossens H, Jonkers D, Masclee A. Efficacy of *Lactobacillus casei* Shirota for patients with irritable bowel syndrome. *European journal of gastroenterology & hepatology* 2016;8-14.

Giannetti E, Maglione M, Alessandrella A, et al. A Mixture of 3 Bifidobacteria Decreases Abdominal Pain and Improves the Quality of Life in Children with Irritable Bowel Syndrome. *Journal of clinical gastroenterology* 2017:e5-e10.

Jadrešin O, Hojsak I, Mišak Z, et al. *Lactobacillus reuteri* DSM 17938 in the Treatment of Functional Abdominal Pain in Children: RCT Study. *Journal of pediatric gastroenterology and nutrition* 2017;925-9.

Pinto-Sanchez M, Hall G, Ghajar K, et al. Probiotic *Bifidobacterium longum* NCC3001 Reduces Depression Scores and Alters Brain Activity: a Pilot Study in Patients With Irritable Bowel Syndrome. *Gastroenterology* 2017;448-59.e8.



Cremon C, Guglielmetti S, Gargari G, et al. Effect of *Lactobacillus paracasei* CNCM I-1572 on symptoms, gut microbiota, short chain fatty acids, and immune activation in patients with irritable bowel syndrome: a pilot randomized clinical trial. *United European Gastroenterology Journal* 2018;604-13.

Ishaque S, Khosruzzaman S, Ahmed D, Sah M. A randomized placebo-controlled clinical trial of a multi-strain probiotic formulation (Bio-Kult) in the management of diarrhea-predominant irritable bowel syndrome. *BMC Gastroenterology* 2018.

Kim JY, Park YJ, Lee HJ, Park MY, Kwon O. Effect of *Lactobacillus gasseri* BNR17 on irritable bowel syndrome: a randomized, double-blind, placebo-controlled, dose-finding trial. *Food Science & Biotechnology* 2018;27:853-7.

Majeed M, Nagabhushanam K, Arumugam S, Majeed S, Ali F. *Bacillus coagulans* MTCC 5856 for the management of major depression with irritable bowel syndrome: a randomised, double-blind, placebo controlled, multi-centre, pilot clinical study. *Food & Nutrition Research* 2018;62.

Preston K, Krumian R, Hattner J, de MD, Stewart M, Gaddam S. *Lactobacillus acidophilus* CL1285, *Lactobacillus casei* LBC80R and *Lactobacillus rhamnosus* CLR2 improve quality-of-life and IBS symptoms: a double-blind, randomised, placebo-controlled study. *Beneficial Microbes* 2018;697-706.

Shin SP, Choi YM, Kim WH, et al. A double blind, placebo-controlled, randomized clinical trial that breast milk derived-*Lactobacillus gasseri* BNR17 mitigated diarrhea-dominant irritable bowel syndrome. *Journal of Clinical Biochemistry and Nutrition* 2018;62:179-86.

Sudha MR, Jayanthi N, Aasin M, Dhanashri RD, Anirudh T. Efficacy of *Bacillus coagulans* Unique IS2 in treatment of irritable bowel syndrome in children: A double blind, randomised placebo controlled study. *Beneficial Microbes* 2018;9:563-72.

Sun YY, Li M, Li YY, et al. The effect of *Clostridium butyricum* on symptoms and fecal microbiota in diarrhea-dominant irritable bowel syndrome: a randomized, double-blind, placebo-controlled trial. *Scientific Reports* 2018;8:2964.

Yoon JY, Cha JM, Oh JK, et al. Probiotics Ameliorate Stool Consistency in Patients with Chronic Constipation: A Randomized, Double-Blind, Placebo-Controlled Study. *Digestive Diseases and Sciences* 2018;63:2754-64.

**Question:** *Saccharomyces boulardii* compared to placebo for adults with IBS (6a)

**Bibliography:** Abbas 2014, Choi 2011, Kabir 2011

| Certainty assessment |              |              |               |              |             |                      | No of patients      |         | Effect            |                   | Certainty | Importance |
|----------------------|--------------|--------------|---------------|--------------|-------------|----------------------|---------------------|---------|-------------------|-------------------|-----------|------------|
| No of studies        | Study design | Risk of bias | Inconsistency | Indirectness | Imprecision | Other considerations | <i>S. boulardii</i> | placebo | Relative (95% CI) | Absolute (95% CI) |           |            |

**Abdominal pain subscale (follow up: range 4 weeks to 6 weeks)**

|   |                   |                      |             |             |                               |      |     |     |   |                                                      |                  |          |
|---|-------------------|----------------------|-------------|-------------|-------------------------------|------|-----|-----|---|------------------------------------------------------|------------------|----------|
| 3 | randomised trials | serious <sup>a</sup> | not serious | not serious | very serious <sup>b,c,d</sup> | none | 117 | 115 | - | SMD 0.26<br>SD higher<br>(0.09 lower to 0.61 higher) | ⊕○○○<br>VERY LOW | CRITICAL |
|---|-------------------|----------------------|-------------|-------------|-------------------------------|------|-----|-----|---|------------------------------------------------------|------------------|----------|

**IBS symptom scale (follow up: 4 weeks; Scale from: 0 to 6)**

|   |                   |                      |             |             |                             |      |    |    |   |                                                |                  |          |
|---|-------------------|----------------------|-------------|-------------|-----------------------------|------|----|----|---|------------------------------------------------|------------------|----------|
| 1 | randomised trials | serious <sup>a</sup> | not serious | not serious | very serious <sup>b,c</sup> | none | 45 | 45 | - | MD 0.1<br>lower<br>(0.43 lower to 0.23 higher) | ⊕○○○<br>VERY LOW | CRITICAL |
|---|-------------------|----------------------|-------------|-------------|-----------------------------|------|----|----|---|------------------------------------------------|------------------|----------|

CI: Confidence interval; SMD: Standardized mean difference; MD: Mean difference

## Explanations

- Unclear risk of reporting bias in all studies
- The 95% CI includes the potential for both benefit and harm.
- Few events reported do not meet the optimal information size and suggest fragility in the estimate.
- May not provide a clinically meaningful estimate based on the interpretation of the SMD.

Abdominal pain subscale (assessed at end of study)

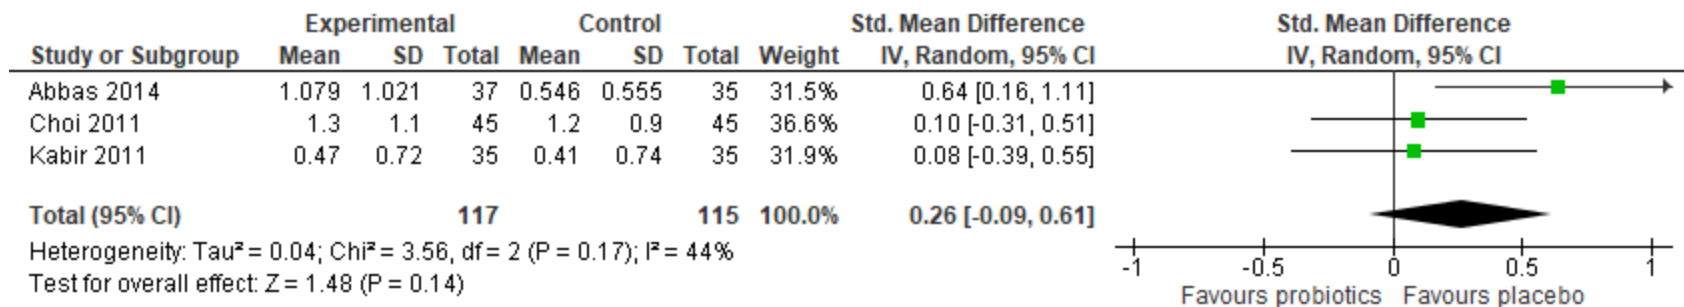

IBS symptom scale (7-point scale)

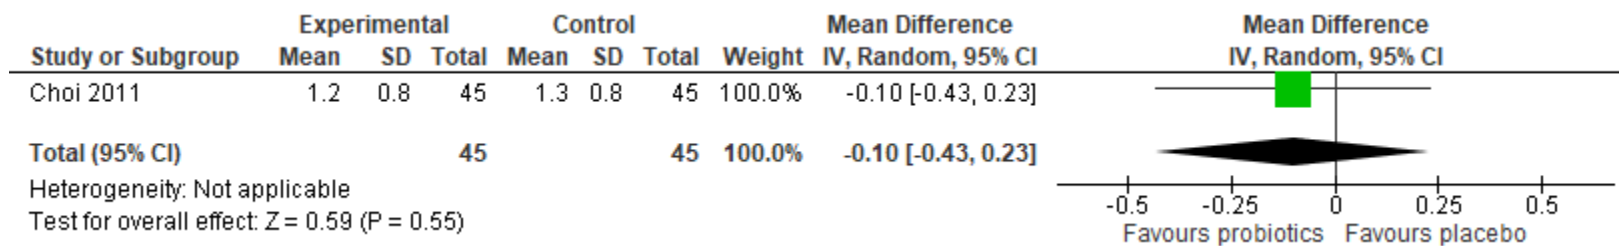

**Question:** *Lactobacillus paracasei* subsp. *paracasei* + *Lactobacillus plantarum* + *Lactobacillus acidophilus* + *Lactobacillus delbrueckii* subsp. *bulgaricus* + *Bifidobacterium longum* subsp. *longum* + *Bifidobacterium breve* + *B. longum* subsp. *infantis* + *Streptococcus salivarius* subsp. *thermophilus* compared to placebo for adults with IBS (6b)

**Bibliography:** Kim 2003, Kim 2005, Michail 2011

| Certainty assessment |              |              |               |              |             |                      | No of patients                                                                                                                                                                                                                                                                                   |         | Effect            |                   | Certainty | Importance |
|----------------------|--------------|--------------|---------------|--------------|-------------|----------------------|--------------------------------------------------------------------------------------------------------------------------------------------------------------------------------------------------------------------------------------------------------------------------------------------------|---------|-------------------|-------------------|-----------|------------|
| No of studies        | Study design | Risk of bias | Inconsistency | Indirectness | Imprecision | Other considerations |                                                                                                                                                                                                                                                                                                  | Placebo | Relative (95% CI) | Absolute (95% CI) |           |            |
|                      |              |              |               |              |             |                      | <i>L. paracasei</i> subsp. <i>paracasei</i> + <i>L. plantarum</i> + <i>L. acidophilus</i> + <i>L. delbrueckii</i> subsp. <i>bulgaricus</i> + <i>B. longum</i> subsp. <i>longum</i> + <i>B. breve</i> + <i>B. longum</i> subsp. <i>infantis</i> + <i>S. salivarius</i> subsp. <i>thermophilus</i> |         |                   |                   |           |            |

**Urgency (mean VAS measured by difference in groups at end of study)**

|   |                   |                      |             |                      |                      |      |    |    |   |                                                |                  |          |
|---|-------------------|----------------------|-------------|----------------------|----------------------|------|----|----|---|------------------------------------------------|------------------|----------|
| 2 | randomised trials | serious <sup>a</sup> | not serious | serious <sup>b</sup> | serious <sup>c</sup> | none | 36 | 37 | - | mean <b>3 lower</b> (4.06 lower to 1.94 lower) | ⊕○○○<br>VERY LOW | CRITICAL |
|---|-------------------|----------------------|-------------|----------------------|----------------------|------|----|----|---|------------------------------------------------|------------------|----------|

**Abdominal Pain (mean VAS measured by difference in groups at end of study)**

| Certainty assessment |                   |                      |               |                      |                      |                      | № of patients                                                                                                                                                                                                                                                                                    |         | Effect            |                                                   | Certainty        | Importance |
|----------------------|-------------------|----------------------|---------------|----------------------|----------------------|----------------------|--------------------------------------------------------------------------------------------------------------------------------------------------------------------------------------------------------------------------------------------------------------------------------------------------|---------|-------------------|---------------------------------------------------|------------------|------------|
| № of studies         | Study design      | Risk of bias         | Inconsistency | Indirectness         | Imprecision          | Other considerations | <i>L. paracasei</i> subsp. <i>paracasei</i> + <i>L. plantarum</i> + <i>L. acidophilus</i> + <i>L. delbrueckii</i> subsp. <i>bulgaricus</i> + <i>B. longum</i> subsp. <i>longum</i> + <i>B. breve</i> + <i>B. longum</i> subsp. <i>infantis</i> + <i>S. salivarius</i> subsp. <i>thermophilus</i> | Placebo | Relative (95% CI) | Absolute (95% CI)                                 |                  |            |
| 2                    | randomised trials | serious <sup>a</sup> | not serious   | serious <sup>b</sup> | serious <sup>c</sup> | none                 | 36                                                                                                                                                                                                                                                                                               | 37      | -                 | mean <b>3.78 lower</b> (4.93 lower to 2.62 lower) | ⊕○○○<br>VERY LOW | CRITICAL   |

**Overall Response (mean VAS measured by difference in groups at end of study)**

|   |                   |                      |             |             |                             |      |    |    |   |                                                  |                  |          |
|---|-------------------|----------------------|-------------|-------------|-----------------------------|------|----|----|---|--------------------------------------------------|------------------|----------|
| 1 | randomised trials | serious <sup>a</sup> | not serious | not serious | very serious <sup>c,d</sup> | none | 12 | 13 | - | mean <b>18 lower</b> (28.62 lower to 7.38 lower) | ⊕○○○<br>VERY LOW | CRITICAL |
|---|-------------------|----------------------|-------------|-------------|-----------------------------|------|----|----|---|--------------------------------------------------|------------------|----------|

**Global GSRS Score**

| Certainty assessment |                   |                      |               |              |                      |                      | № of patients                                                                                                                                                                                                                                                                                    |         | Effect            |                                                     | Certainty   | Importance |
|----------------------|-------------------|----------------------|---------------|--------------|----------------------|----------------------|--------------------------------------------------------------------------------------------------------------------------------------------------------------------------------------------------------------------------------------------------------------------------------------------------|---------|-------------------|-----------------------------------------------------|-------------|------------|
| № of studies         | Study design      | Risk of bias         | Inconsistency | Indirectness | Imprecision          | Other considerations | <i>L. paracasei</i> subsp. <i>paracasei</i> + <i>L. plantarum</i> + <i>L. acidophilus</i> + <i>L. delbrueckii</i> subsp. <i>bulgaricus</i> + <i>B. longum</i> subsp. <i>longum</i> + <i>B. breve</i> + <i>B. longum</i> subsp. <i>infantis</i> + <i>S. salivarius</i> subsp. <i>thermophilus</i> | Placebo | Relative (95% CI) | Absolute (95% CI)                                   |             |            |
| 1                    | randomised trials | serious <sup>f</sup> | not serious   | not serious  | serious <sup>c</sup> | none                 | 15                                                                                                                                                                                                                                                                                               | 9       | -                 | mean <b>0.2 higher</b> (0.74 higher to 0.34 higher) | ⊕⊕○○<br>LOW | CRITICAL   |

CI: Confidence interval

### Explanations

- a. unclear risk of selection, reporting bias in all studies
- b. IBS subtypes varied across studies
- c. Few events reported do not meet the optimal information size and suggest fragility in the estimate.
- d. The 95% CI includes the potential for both benefit and harm.
- e. Unclear risk of reporting bias in all studies
- f. Unclear risk of detection and reporting bias

g. Unclear risk of selection, detection, and reporting bias

Mean VAS for Urgency (measured by difference in groups at end of study)

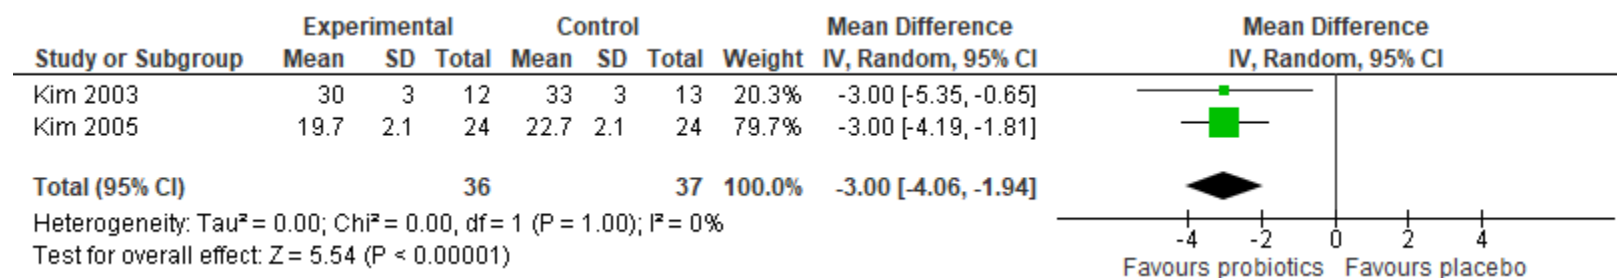

Mean VAS for Abdominal Pain (measured by difference in groups at end of study)

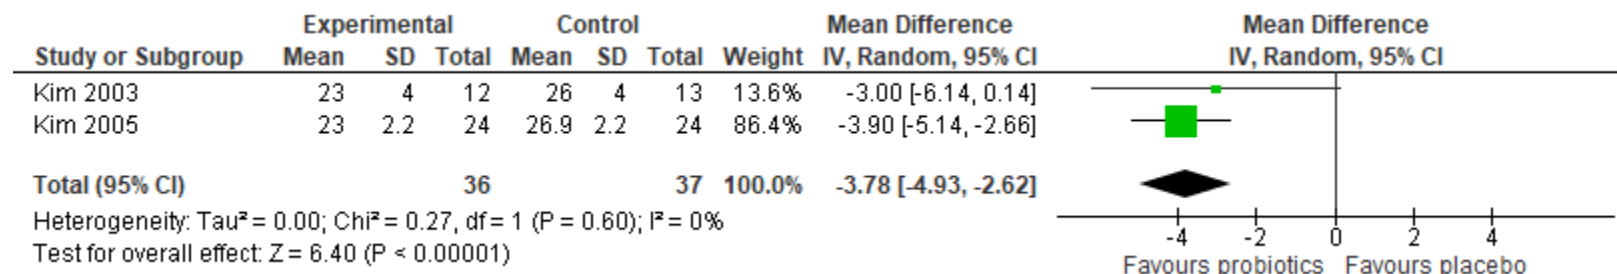

Overall VAS Score (measured by difference in groups at end of study)

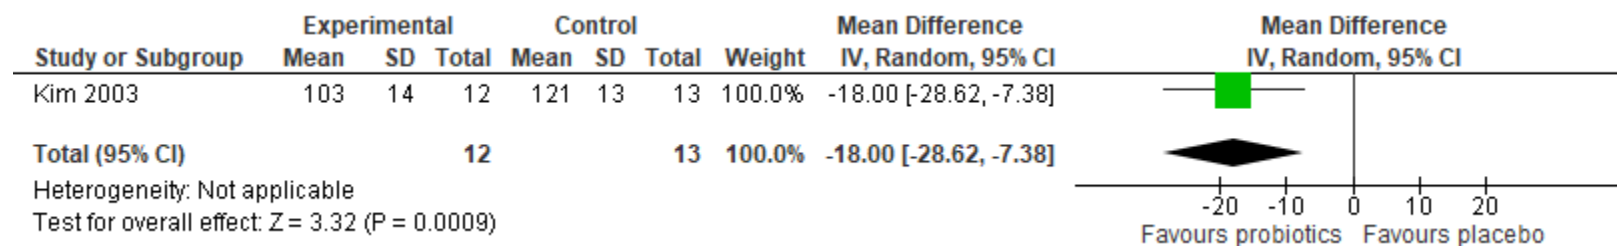

Global GSRS Score at End of Study (lower = better)

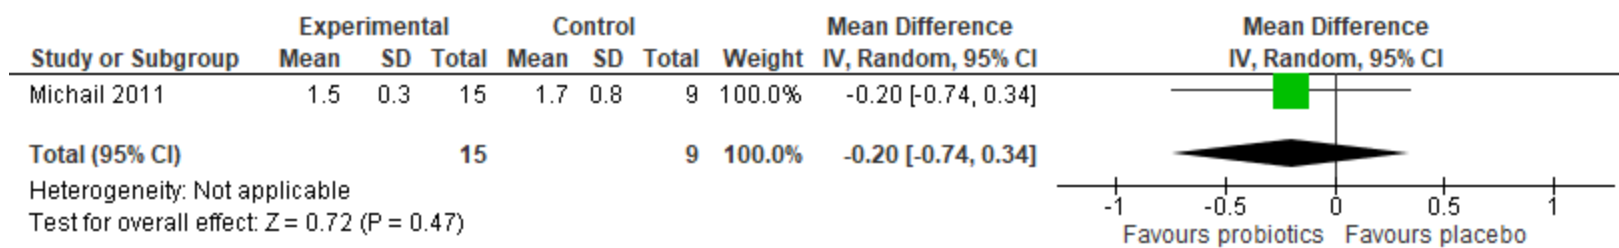



## Question: *Escherichia coli* Nissle 1917 compared to placebo for adults with IBS (6c)

Bibliography: Kruis 2012

| Certainty assessment |              |              |               |              |             |                      | № of patients              |         | Effect            |                   | Certainty | Importance |
|----------------------|--------------|--------------|---------------|--------------|-------------|----------------------|----------------------------|---------|-------------------|-------------------|-----------|------------|
| № of studies         | Study design | Risk of bias | Inconsistency | Indirectness | Imprecision | Other considerations | <i>E. coli</i> Nissle 1917 | placebo | Relative (95% CI) | Absolute (95% CI) |           |            |

### Adverse Events

|   |                   |                      |             |             |                           |      |                  |                  |                           |                                                   |                  |          |
|---|-------------------|----------------------|-------------|-------------|---------------------------|------|------------------|------------------|---------------------------|---------------------------------------------------|------------------|----------|
| 1 | randomised trials | serious <sup>a</sup> | not serious | not serious | very serious <sup>b</sup> | none | 30/60<br>(50.0%) | 27/60<br>(45.0%) | RR 1.11<br>(0.76 to 1.62) | 50 more per 1,000<br>(from 108 fewer to 279 more) | ⊕○○○<br>VERY LOW | CRITICAL |
|---|-------------------|----------------------|-------------|-------------|---------------------------|------|------------------|------------------|---------------------------|---------------------------------------------------|------------------|----------|

### Overall Clinical Response (measured by difference in groups at end of study)

|   |                   |                      |             |             |                           |      |                  |                  |                           |                                                   |                  |          |
|---|-------------------|----------------------|-------------|-------------|---------------------------|------|------------------|------------------|---------------------------|---------------------------------------------------|------------------|----------|
| 1 | randomised trials | serious <sup>a</sup> | not serious | not serious | very serious <sup>b</sup> | none | 27/51<br>(52.9%) | 23/48<br>(47.9%) | RR 1.10<br>(0.75 to 1.64) | 48 more per 1,000<br>(from 120 fewer to 307 more) | ⊕○○○<br>VERY LOW | CRITICAL |
|---|-------------------|----------------------|-------------|-------------|---------------------------|------|------------------|------------------|---------------------------|---------------------------------------------------|------------------|----------|

CI: Confidence interval; RR: Risk ratio

## Explanations

a. Unclear risk of detection bias.

b. The 95% CI includes the potential for both benefit and harm.

Adverse events

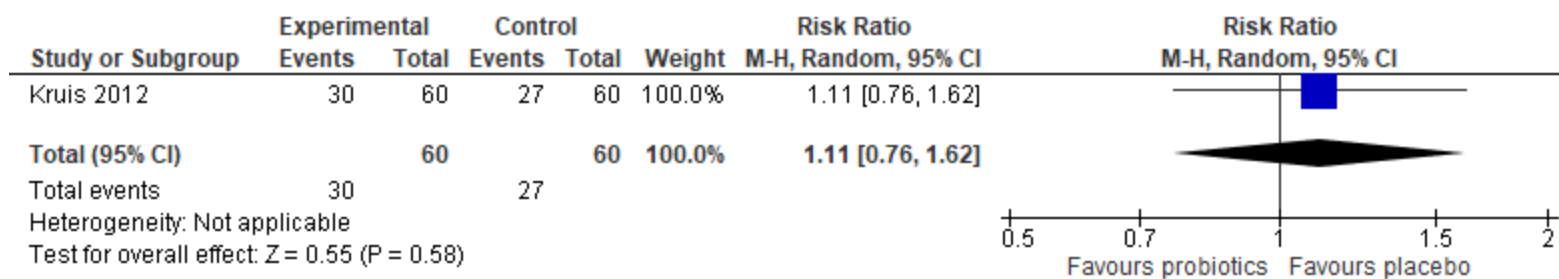

Clinical Response (measured by difference in groups at end of study)

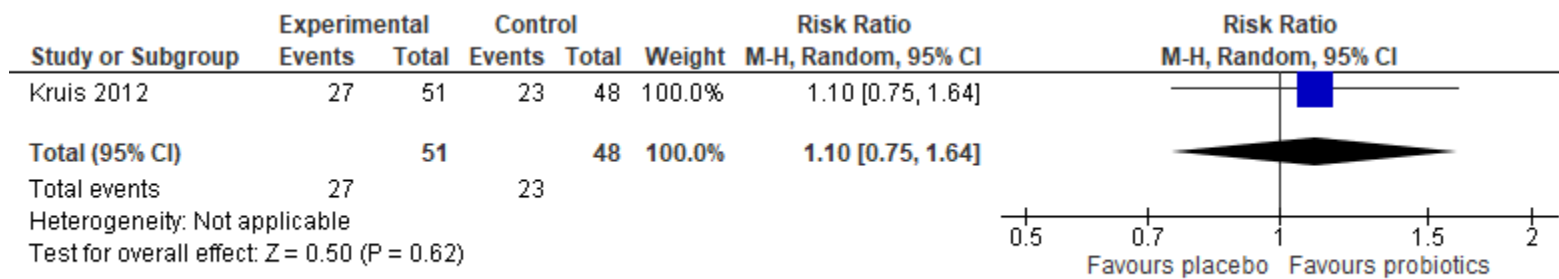

**Question:** *Lactobacillus paracasei* subsp. *paracasei* + *Lactobacillus plantarum* + *Lactobacillus acidophilus* + *Lactobacillus delbrueckii* subsp. *bulgaricus* + *Bifidobacterium longum* subsp. *longum* + *Bifidobacterium breve* + *B. longum* subsp. *infantis* + *Streptococcus salivarius* subsp. *thermophilus* compared to placebo for children with IBS (6d)

**Bibliography:** Guandalini 2010

| Certainty assessment |              |              |               |              |             |                                                                                                                                                                                                                                                                                                  | № of patients |                   | Effect            |  | Certainty | Importance |
|----------------------|--------------|--------------|---------------|--------------|-------------|--------------------------------------------------------------------------------------------------------------------------------------------------------------------------------------------------------------------------------------------------------------------------------------------------|---------------|-------------------|-------------------|--|-----------|------------|
| № of studies         | Study design | Risk of bias | Inconsistency | Indirectness | Imprecision | Other considerations                                                                                                                                                                                                                                                                             | Placebo       | Relative (95% CI) | Absolute (95% CI) |  |           |            |
|                      |              |              |               |              |             | <i>L. paracasei</i> subsp. <i>paracasei</i> + <i>L. plantarum</i> + <i>L. acidophilus</i> + <i>L. delbrueckii</i> subsp. <i>bulgaricus</i> + <i>B. longum</i> subsp. <i>longum</i> + <i>B. breve</i> + <i>B. longum</i> subsp. <i>infantis</i> + <i>S. salivarius</i> subsp. <i>thermophilus</i> |               |                   |                   |  |           |            |

**Reduction in Abdominal Pain Scores at 6 weeks (higher is better)**

| Certainty assessment |                   |                           |               |              |                          |                      | № of patients                                                                                                                                                                                                                                                                                    |         | Effect            |                                                     | Certainty   | Importance |
|----------------------|-------------------|---------------------------|---------------|--------------|--------------------------|----------------------|--------------------------------------------------------------------------------------------------------------------------------------------------------------------------------------------------------------------------------------------------------------------------------------------------|---------|-------------------|-----------------------------------------------------|-------------|------------|
| № of studies         | Study design      | Risk of bias              | Inconsistency | Indirectness | Imprecision              | Other considerations | <i>L. paracasei</i> subsp. <i>paracasei</i> + <i>L. plantarum</i> + <i>L. acidophilus</i> + <i>L. delbrueckii</i> subsp. <i>bulgaricus</i> + <i>B. longum</i> subsp. <i>longum</i> + <i>B. breve</i> + <i>B. longum</i> subsp. <i>infantis</i> + <i>S. salivarius</i> subsp. <i>thermophilus</i> | Placebo | Relative (95% CI) | Absolute (95% CI)                                   |             |            |
| 1                    | randomised trials | very serious <sup>a</sup> | not serious   | not serious  | not serious <sup>b</sup> | none                 | 59                                                                                                                                                                                                                                                                                               | 59      | -                 | mean <b>0.5 higher</b> (0.43 higher to 0.57 higher) | ⊕⊕○○<br>LOW | CRITICAL   |

**Reduction in Abdominal Bloating Scores at 6 weeks (higher is better)**

|   |                   |                           |             |             |                          |      |    |    |   |                                                      |             |  |
|---|-------------------|---------------------------|-------------|-------------|--------------------------|------|----|----|---|------------------------------------------------------|-------------|--|
| 1 | randomised trials | very serious <sup>a</sup> | not serious | not serious | not serious <sup>b</sup> | none | 59 | 59 | - | mean <b>0.85 higher</b> (0.74 higher to 0.96 higher) | ⊕⊕○○<br>LOW |  |
|---|-------------------|---------------------------|-------------|-------------|--------------------------|------|----|----|---|------------------------------------------------------|-------------|--|

CI: Confidence interval

**Explanations**

- a. High risk of attrition bias
- b. Same patients crossed over; improvement noted over time even with placebo

\*Guandalini 2010 – of note, patients crossed over. All patients received either placebo or probiotics, then switched over to receive the other. Total 59 subjects

Reduction in Abdominal Pain scores at 6 weeks (measured by change from baseline to week 6)

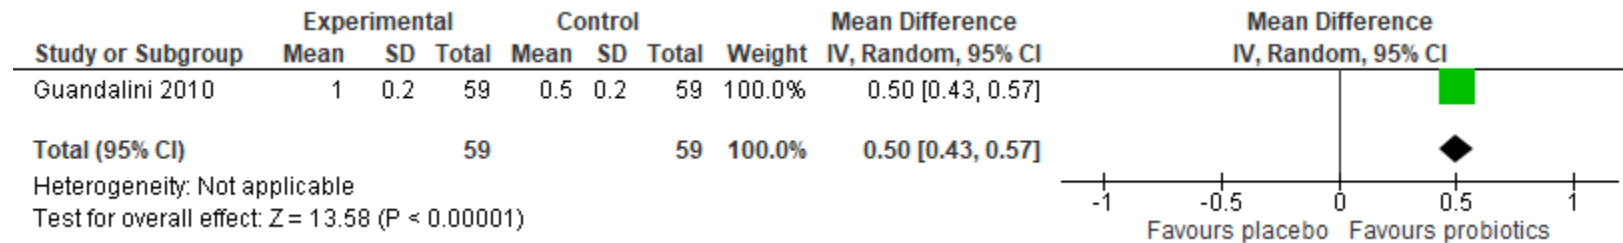

Reduction in Bloating scores at 6 weeks (measured by change from baseline to week 6)

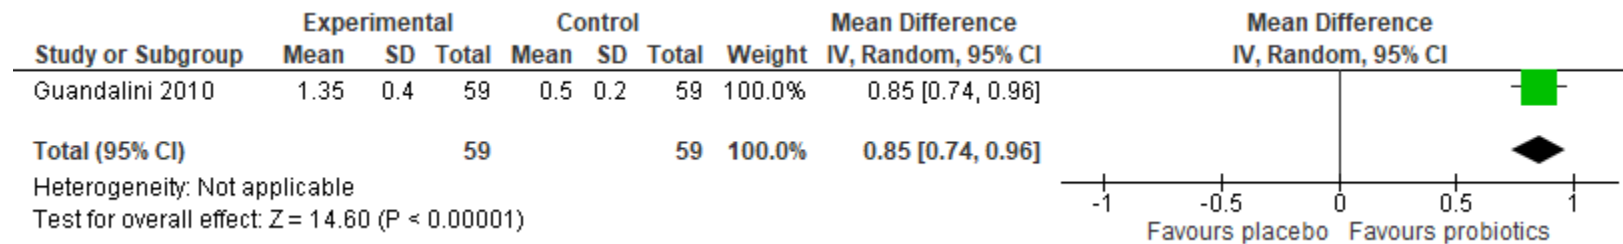

## Question: *Lactobacillus plantarum* 299v compared to placebo for adults with IBS (6e)

Bibliography: Stevenson 2014, Ducrotte 2012, Niedzielen 2001

| Certainty assessment |              |              |               |              |             |                      | № of patients            |         | Effect            |                   | Certainty | Importance |
|----------------------|--------------|--------------|---------------|--------------|-------------|----------------------|--------------------------|---------|-------------------|-------------------|-----------|------------|
| № of studies         | Study design | Risk of bias | Inconsistency | Indirectness | Imprecision | Other considerations | <i>L. plantarum</i> 299v | Placebo | Relative (95% CI) | Absolute (95% CI) |           |            |

Severity Score as per Francis Score at End of Study (0-100; higher is more severe)

|   |                   |             |             |             |                           |      |    |    |   |                                                        |             |          |
|---|-------------------|-------------|-------------|-------------|---------------------------|------|----|----|---|--------------------------------------------------------|-------------|----------|
| 1 | randomised trials | not serious | not serious | not serious | very serious <sup>a</sup> | none | 54 | 27 | - | mean <b>23.78 higher</b> (23.08 lower to 70.64 higher) | ⊕⊕○○<br>LOW | CRITICAL |
|---|-------------------|-------------|-------------|-------------|---------------------------|------|----|----|---|--------------------------------------------------------|-------------|----------|

Overall QOL-IBS questionnaire (1-5; higher is more severe)

|   |                   |             |             |             |                           |      |    |    |   |                                                      |             |          |
|---|-------------------|-------------|-------------|-------------|---------------------------|------|----|----|---|------------------------------------------------------|-------------|----------|
| 1 | randomised trials | not serious | not serious | not serious | very serious <sup>a</sup> | none | 54 | 27 | - | mean <b>8.59 higher</b> (3.76 lower to 20.94 higher) | ⊕⊕○○<br>LOW | CRITICAL |
|---|-------------------|-------------|-------------|-------------|---------------------------|------|----|----|---|------------------------------------------------------|-------------|----------|

Abdominal Pain Severity as per VAS (higher is more severe)

| Certainty assessment |                   |                      |               |              |                      |                      | № of patients            |         | Effect            |                                                   | Certainty   | Importance |
|----------------------|-------------------|----------------------|---------------|--------------|----------------------|----------------------|--------------------------|---------|-------------------|---------------------------------------------------|-------------|------------|
| № of studies         | Study design      | Risk of bias         | Inconsistency | Indirectness | Imprecision          | Other considerations | <i>L. plantarum</i> 299v | Placebo | Relative (95% CI) | Absolute (95% CI)                                 |             |            |
| 1                    | randomised trials | serious <sup>b</sup> | not serious   | not serious  | serious <sup>d</sup> | none                 | 108                      | 106     | -                 | mean <b>0.24 lower</b> (0.39 lower to 0.09 lower) | ⊕⊕○○<br>LOW | CRITICAL   |

#### Improvement in Abdominal Pain at Study End

|   |                   |                      |             |             |                      |      |                |               |                               |                                                       |             |          |
|---|-------------------|----------------------|-------------|-------------|----------------------|------|----------------|---------------|-------------------------------|-------------------------------------------------------|-------------|----------|
| 1 | randomised trials | serious <sup>c</sup> | not serious | not serious | serious <sup>d</sup> | none | 20/20 (100.0%) | 11/20 (55.0%) | <b>RR 1.78</b> (1.20 to 2.64) | <b>429 more per 1,000</b> (from 110 more to 902 more) | ⊕⊕○○<br>LOW | CRITICAL |
|---|-------------------|----------------------|-------------|-------------|----------------------|------|----------------|---------------|-------------------------------|-------------------------------------------------------|-------------|----------|

#### Overall Improvement at Study End

|   |                   |                      |             |             |                      |      |               |              |                                |                                                         |             |          |
|---|-------------------|----------------------|-------------|-------------|----------------------|------|---------------|--------------|--------------------------------|---------------------------------------------------------|-------------|----------|
| 1 | randomised trials | serious <sup>c</sup> | not serious | not serious | serious <sup>d</sup> | none | 19/20 (95.0%) | 3/20 (15.0%) | <b>RR 6.33</b> (2.22 to 18.06) | <b>800 more per 1,000</b> (from 183 more to 1,000 more) | ⊕⊕○○<br>LOW | CRITICAL |
|---|-------------------|----------------------|-------------|-------------|----------------------|------|---------------|--------------|--------------------------------|---------------------------------------------------------|-------------|----------|

CI: Confidence interval; RR: Risk ratio

#### Explanations

- a. The 95% CI includes the potential for both benefit and harm.
- b. Unclear risk of detection and reporting bias
- c. Unclear risk of selection, detection, attrition, and reporting bias
- d. Few events reported do not meet the optimal information size and suggest fragility in the estimate.
- e. Unclear risk of selection, detection, performance, and reporting bias
- f. No S.D. included

Francis Severity Score at the end of study

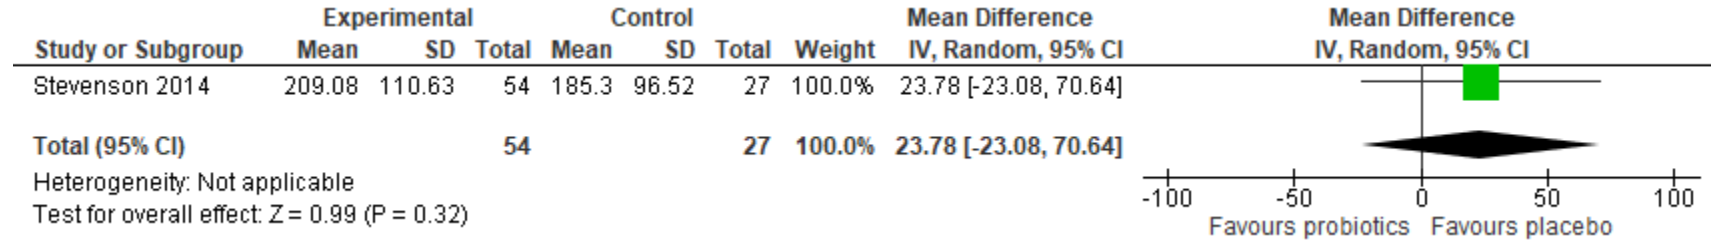

Overall QOL-IBS questionnaire (lower = better)

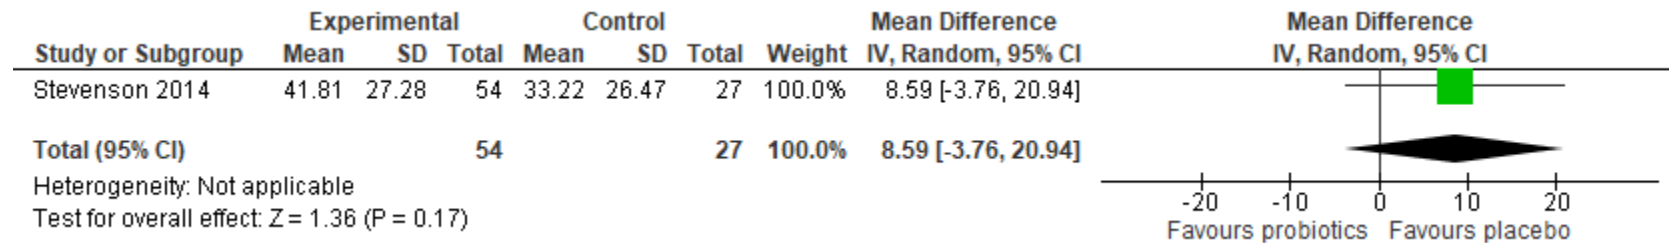

Abdominal Pain Severity as per VAS (measured by mean score reduction)



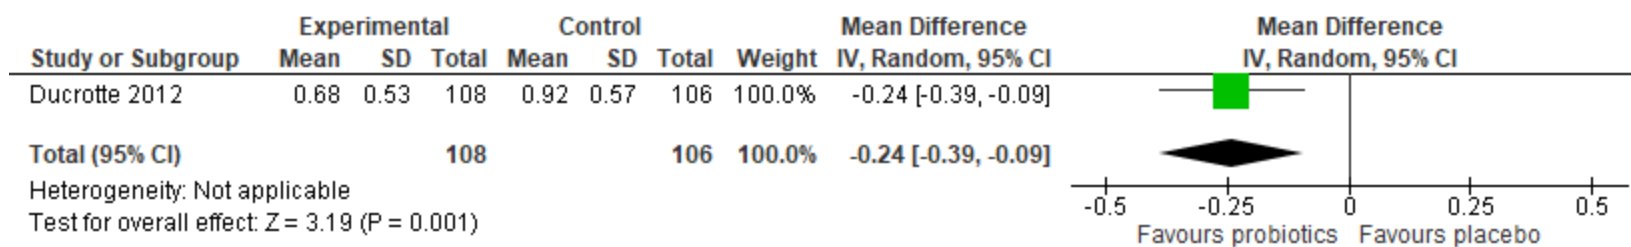

#### Improvement in Abdominal Pain at end of Study

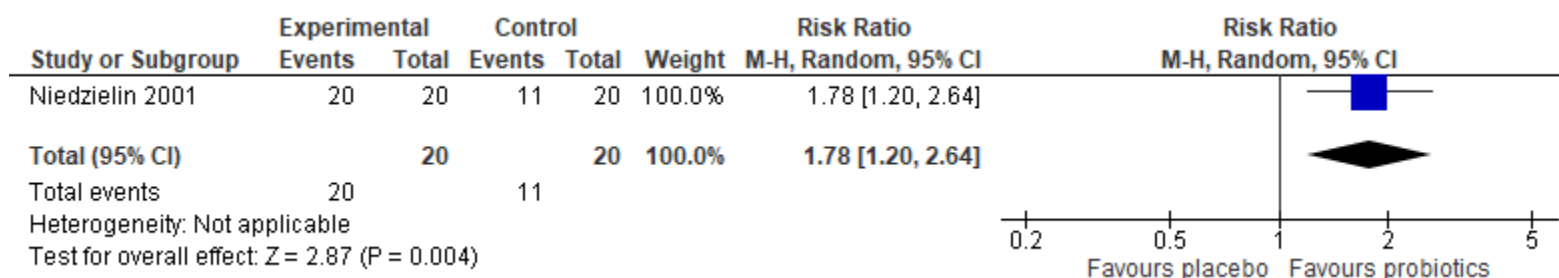

#### Overall Improvement at End of Study (partial or complete improvement)

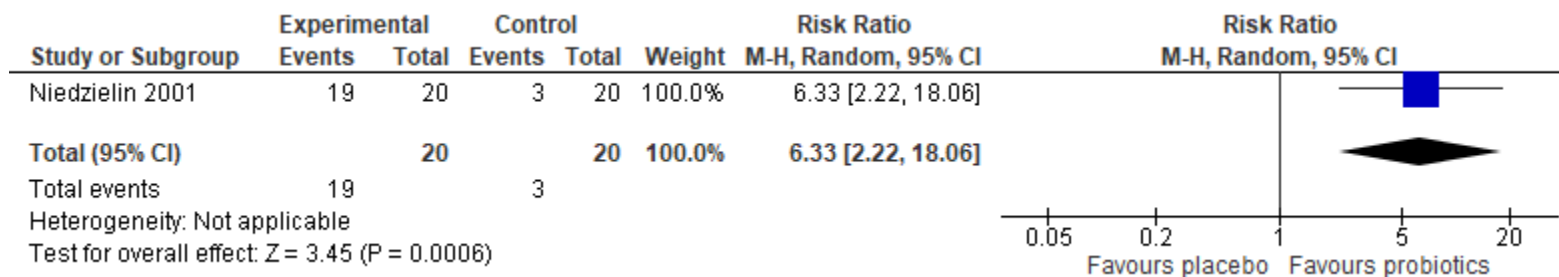

**Question:** *Lactobacillus rhamnosus* ATCC 53103 compared to placebo for treatment of IBS in adults (6f)

**Bibliography:** O'Sullivan 2000

| Certainty assessment |              |              |               |              |             |                      | No of patients                 |         | Effect            |                   | Certainty | Importance |
|----------------------|--------------|--------------|---------------|--------------|-------------|----------------------|--------------------------------|---------|-------------------|-------------------|-----------|------------|
| No of studies        | Study design | Risk of bias | Inconsistency | Indirectness | Imprecision | Other considerations | <i>L. rhamnosus</i> ATCC 53103 | Placebo | Relative (95% CI) | Absolute (95% CI) |           |            |

**Mean Bloating Scores**

|   |                   |                      |             |             |                      |      |    |    |   |                                                      |             |          |
|---|-------------------|----------------------|-------------|-------------|----------------------|------|----|----|---|------------------------------------------------------|-------------|----------|
| 1 | randomised trials | serious <sup>a</sup> | not serious | not serious | serious <sup>b</sup> | none | 24 | 24 | - | mean <b>0.1 lower</b><br>(0.21 lower to 0.01 higher) | ⊕⊕○○<br>LOW | CRITICAL |
|---|-------------------|----------------------|-------------|-------------|----------------------|------|----|----|---|------------------------------------------------------|-------------|----------|

**Mean Pain Scores**

|   |                   |                      |             |             |                      |      |    |    |   |                                                     |             |          |
|---|-------------------|----------------------|-------------|-------------|----------------------|------|----|----|---|-----------------------------------------------------|-------------|----------|
| 1 | randomised trials | serious <sup>a</sup> | not serious | not serious | serious <sup>b</sup> | none | 24 | 24 | - | mean <b>0.2 lower</b><br>(0.14 lower to 0.26 lower) | ⊕⊕○○<br>LOW | CRITICAL |
|---|-------------------|----------------------|-------------|-------------|----------------------|------|----|----|---|-----------------------------------------------------|-------------|----------|

**CI:** Confidence interval

**Explanations**

a. Unclear risk of selection, performance, detection, attrition, and reporting bias

b. Cross over study

Mean Bloating Scores (lower = better)

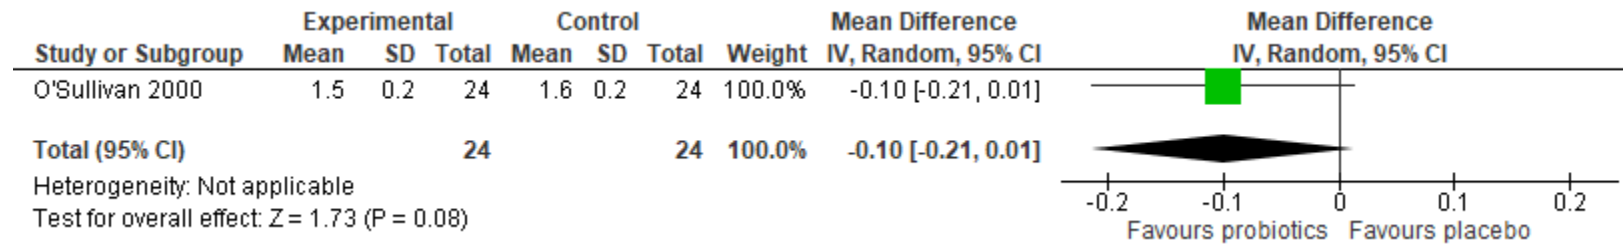

Mean Pain Scores (lower = better)

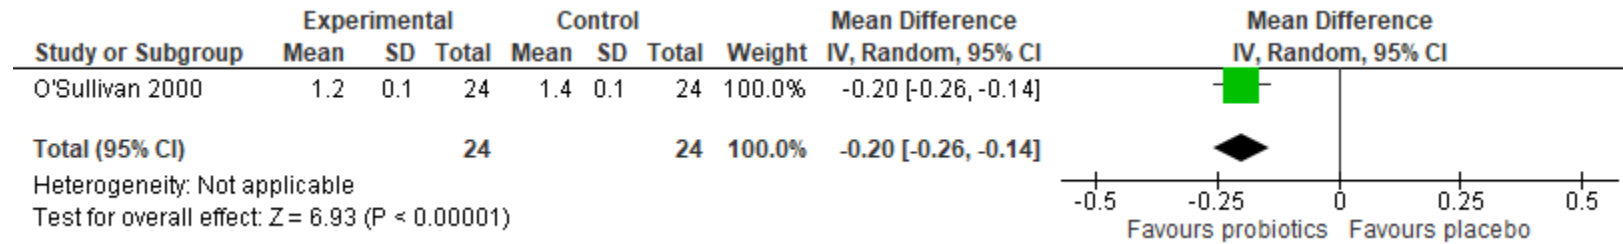

**Question:** *Lactobacillus rhamnosus* ATCC 53103 compared to placebo for children with IBS (6g)

**Bibliography:** Francavilla 2010, Bausserman 2005

| Certainty assessment |              |              |               |              |             |                      | № of patients                  |         | Effect            |                   | Certainty | Importance |
|----------------------|--------------|--------------|---------------|--------------|-------------|----------------------|--------------------------------|---------|-------------------|-------------------|-----------|------------|
| № of studies         | Study design | Risk of bias | Inconsistency | Indirectness | Imprecision | Other considerations | <i>L. rhamnosus</i> ATCC 53103 | Placebo | Relative (95% CI) | Absolute (95% CI) |           |            |

**Response in Diarrhea as per GSRS**

|   |                   |                      |             |             |                           |      |              |             |               |  |                  |          |
|---|-------------------|----------------------|-------------|-------------|---------------------------|------|--------------|-------------|---------------|--|------------------|----------|
| 1 | randomised trials | serious <sup>a</sup> | not serious | not serious | very serious <sup>b</sup> | none | 2/17 (11.8%) | 0/18 (0.0%) | not estimable |  | ⊕○○○<br>VERY LOW | CRITICAL |
|---|-------------------|----------------------|-------------|-------------|---------------------------|------|--------------|-------------|---------------|--|------------------|----------|

**Response in Constipation as per GSRS**

|   |                   |                      |             |             |                           |      |             |              |               |  |                  |          |
|---|-------------------|----------------------|-------------|-------------|---------------------------|------|-------------|--------------|---------------|--|------------------|----------|
| 1 | randomised trials | serious <sup>a</sup> | not serious | not serious | very serious <sup>b</sup> | none | 1/20 (5.0%) | 3/22 (13.6%) | not estimable |  | ⊕○○○<br>VERY LOW | CRITICAL |
|---|-------------------|----------------------|-------------|-------------|---------------------------|------|-------------|--------------|---------------|--|------------------|----------|

**Number of Pain Episodes**

|   |                   |                      |             |             |                      |      |    |    |   |                                                    |             |          |
|---|-------------------|----------------------|-------------|-------------|----------------------|------|----|----|---|----------------------------------------------------|-------------|----------|
| 1 | randomised trials | serious <sup>c</sup> | not serious | not serious | serious <sup>b</sup> | none | 42 | 38 | - | mean 1.6<br>lower (2.25<br>lower to 0.95<br>lower) | ⊕⊕○○<br>LOW | CRITICAL |
|---|-------------------|----------------------|-------------|-------------|----------------------|------|----|----|---|----------------------------------------------------|-------------|----------|

**Intensity Pain Scores**

| Certainty assessment |                   |                      |               |              |                      |                      | № of patients                  |         | Effect            |                                           | Certainty   | Importance |
|----------------------|-------------------|----------------------|---------------|--------------|----------------------|----------------------|--------------------------------|---------|-------------------|-------------------------------------------|-------------|------------|
| № of studies         | Study design      | Risk of bias         | Inconsistency | Indirectness | Imprecision          | Other considerations | <i>L. rhamnosus</i> ATCC 53103 | Placebo | Relative (95% CI) | Absolute (95% CI)                         |             |            |
| 1                    | randomised trials | serious <sup>c</sup> | not serious   | not serious  | serious <sup>b</sup> | none                 | 42                             | 38      | -                 | mean 1.1 lower (1.89 lower to 0.31 lower) | ⊕⊕○○<br>LOW | CRITICAL   |

CI: Confidence interval

### Explanations

- a. Unclear risk of reporting bias
- b. Few events reported do not meet the optimal information size and suggest fragility in the estimate. The 95% CI includes the potential for both benefit and harm.
- c. Unclear risk of detection bias

Response in Diarrhea as per GSRS (more = better)

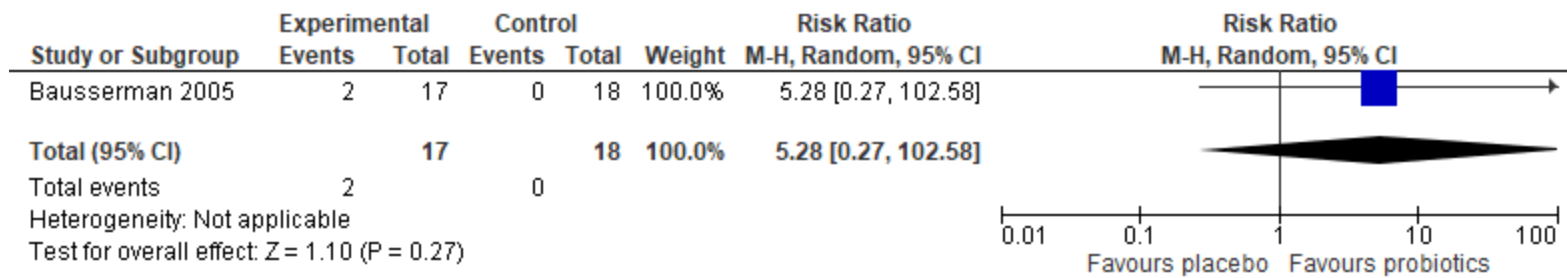

Response in Constipation as per GSRs (more = better)

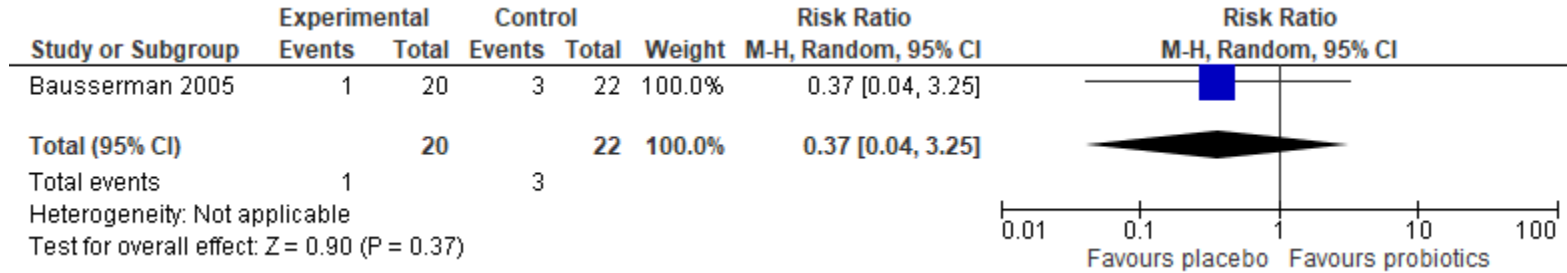

Number of Pain Episodes (measured at weeks 5-12)

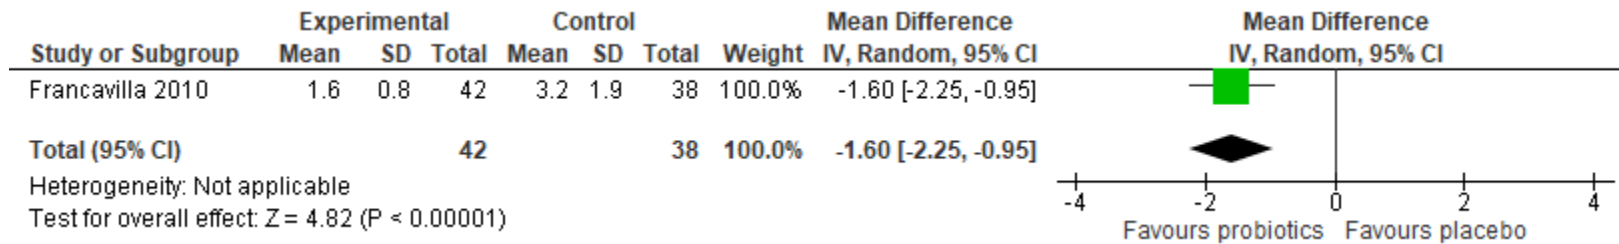

Intensity of Pain Scores (measured at weeks 5-12)

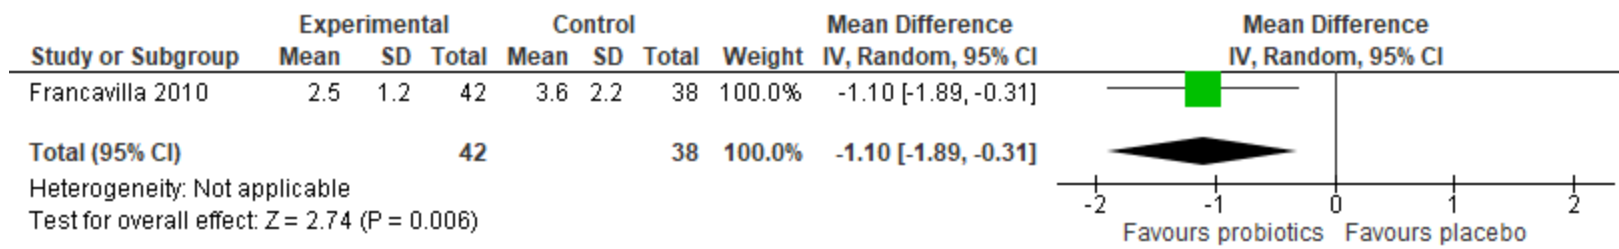

Question: *Bacillus coagulans* MTCC 5856 compared to placebo for treatment of IBS (6h)

Bibliography: Majeed 2016, Majeed 2018

| Certainty assessment |              |              |               |              |             |                      | No of patients                |         | Effect            |                   | Certainty | Importance |
|----------------------|--------------|--------------|---------------|--------------|-------------|----------------------|-------------------------------|---------|-------------------|-------------------|-----------|------------|
| No of studies        | Study design | Risk of bias | Inconsistency | Indirectness | Imprecision | Other considerations | <i>B. coagulans</i> MTCC 5856 | Placebo | Relative (95% CI) | Absolute (95% CI) |           |            |

IBS-QOL Score at End of Study

|   |                   |                      |             |             |                           |      |    |    |   |                                                  |                  |          |
|---|-------------------|----------------------|-------------|-------------|---------------------------|------|----|----|---|--------------------------------------------------|------------------|----------|
| 1 | randomised trials | serious <sup>a</sup> | not serious | not serious | very serious <sup>b</sup> | none | 20 | 20 | - | mean <b>28 lower</b> (48.46 lower to 7.54 lower) | ⊕○○○<br>VERY LOW | CRITICAL |
|---|-------------------|----------------------|-------------|-------------|---------------------------|------|----|----|---|--------------------------------------------------|------------------|----------|

Abdominal Pain Scores at End of Study

|   |                   |                      |             |             |                           |      |    |    |   |                                                   |                  |          |
|---|-------------------|----------------------|-------------|-------------|---------------------------|------|----|----|---|---------------------------------------------------|------------------|----------|
| 1 | randomised trials | serious <sup>c</sup> | not serious | not serious | very serious <sup>d</sup> | none | 18 | 18 | - | mean <b>4.11 lower</b> (4.36 lower to 3.86 lower) | ⊕○○○<br>VERY LOW | CRITICAL |
|---|-------------------|----------------------|-------------|-------------|---------------------------|------|----|----|---|---------------------------------------------------|------------------|----------|

Diarrhea Score at End of Study



| Certainty assessment |                   |                      |               |              |                           |                      | № of patients                 |         | Effect            |                                                   | Certainty        | Importance |
|----------------------|-------------------|----------------------|---------------|--------------|---------------------------|----------------------|-------------------------------|---------|-------------------|---------------------------------------------------|------------------|------------|
| № of studies         | Study design      | Risk of bias         | Inconsistency | Indirectness | Imprecision               | Other considerations | <i>B. coagulans</i> MTCC 5856 | Placebo | Relative (95% CI) | Absolute (95% CI)                                 |                  |            |
| 1                    | randomised trials | serious <sup>c</sup> | not serious   | not serious  | very serious <sup>d</sup> | none                 | 18                            | 18      | -                 | mean <b>2.68 lower</b> (3.00 lower to 2.36 lower) | ⊕○○○<br>VERY LOW | CRITICAL   |

CI: Confidence interval

### Explanations

- a. Unclear detection bias
- b. Few events reported do not meet the optimal information size and suggest fragility in the estimate. The 95% CI includes the potential for both benefit and harm.
- c. Unclear risk of detection, selection, and performance bias
- d. Few events reported do not meet the optimal information size and suggest fragility in the estimate.

IBS-QOL Score at End of Study (lower = better)

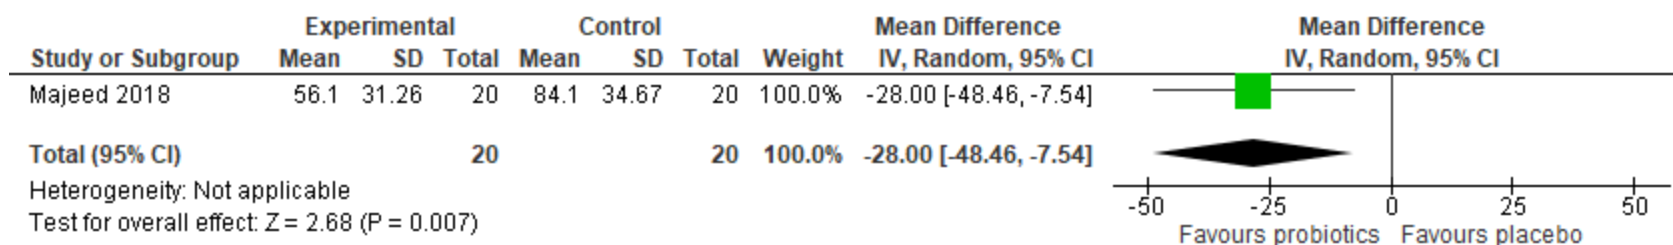

#### Abdominal Pain Scores at End of Study

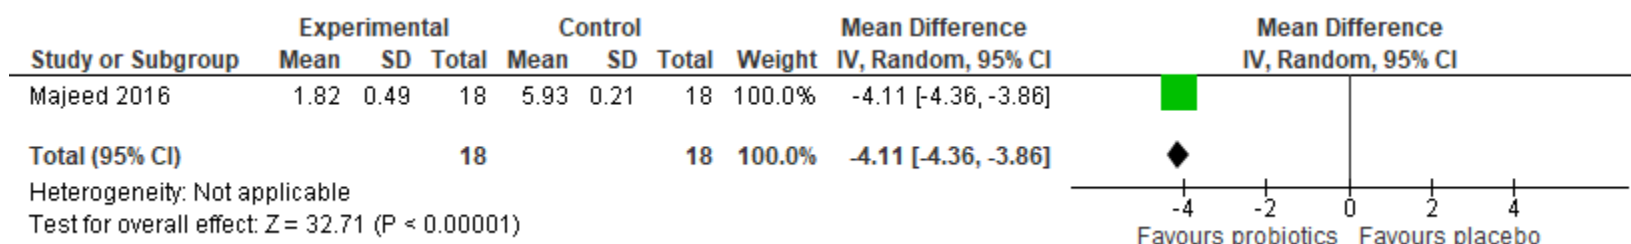

#### Diarrhea Score at End of Study

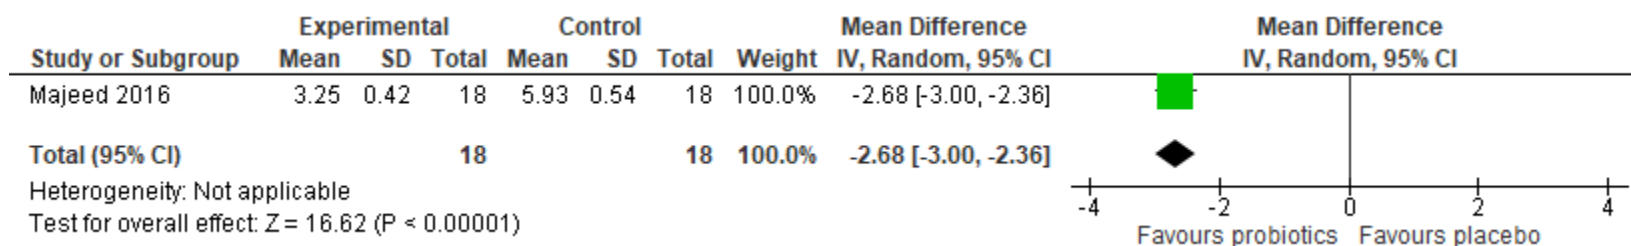

## Question: *Lactobacillus reuteri* compared to placebo for adults with IBS (6i)

Bibliography: Amirmani 2013

| Certainty assessment |              |              |               |              |             |                      | No of patients    |         | Effect            |                   | Certainty | Importance |
|----------------------|--------------|--------------|---------------|--------------|-------------|----------------------|-------------------|---------|-------------------|-------------------|-----------|------------|
| No of studies        | Study design | Risk of bias | Inconsistency | Indirectness | Imprecision | Other considerations | <i>L. reuteri</i> | Placebo | Relative (95% CI) | Absolute (95% CI) |           |            |

### Abdominal Pain

|   |                   |                           |             |             |                      |      |    |    |   |                                                     |                  |          |
|---|-------------------|---------------------------|-------------|-------------|----------------------|------|----|----|---|-----------------------------------------------------|------------------|----------|
| 1 | randomised trials | very serious <sup>a</sup> | not serious | not serious | serious <sup>b</sup> | none | 41 | 31 | - | mean <b>0.46 higher</b> (0.23 lower to 1.15 higher) | ⊕○○○<br>VERY LOW | CRITICAL |
|---|-------------------|---------------------------|-------------|-------------|----------------------|------|----|----|---|-----------------------------------------------------|------------------|----------|

### Mean Stool Frequency

|   |                   |                           |             |             |                      |      |    |    |   |                                                    |                  |          |
|---|-------------------|---------------------------|-------------|-------------|----------------------|------|----|----|---|----------------------------------------------------|------------------|----------|
| 1 | randomised trials | very serious <sup>a</sup> | not serious | not serious | serious <sup>b</sup> | none | 41 | 31 | - | mean <b>0.29 lower</b> (0.87 lower to 0.29 higher) | ⊕○○○<br>VERY LOW | CRITICAL |
|---|-------------------|---------------------------|-------------|-------------|----------------------|------|----|----|---|----------------------------------------------------|------------------|----------|

CI: Confidence interval

### Explanations

a. High risk of selection, detection, performance, and attrition bias. Symptom scores appear unbalanced at baseline, therefore measurement at end of study also unbalanced (i.e., mean stool frequency reflects an increase from baseline for probiotic group and a decrease from baseline in placebo group).

b. Few events reported do not meet the optimal information size and suggest fragility in the estimate.

Abdominal pain Scores at end of treatment

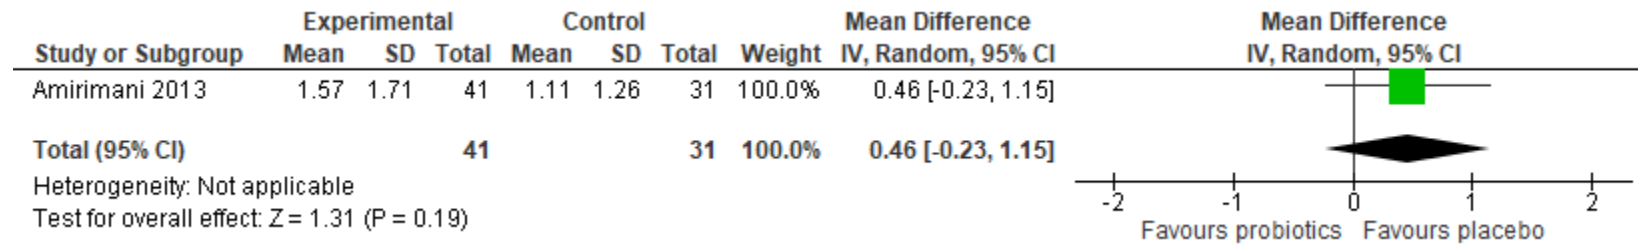

Mean Stool Frequency at end of treatment

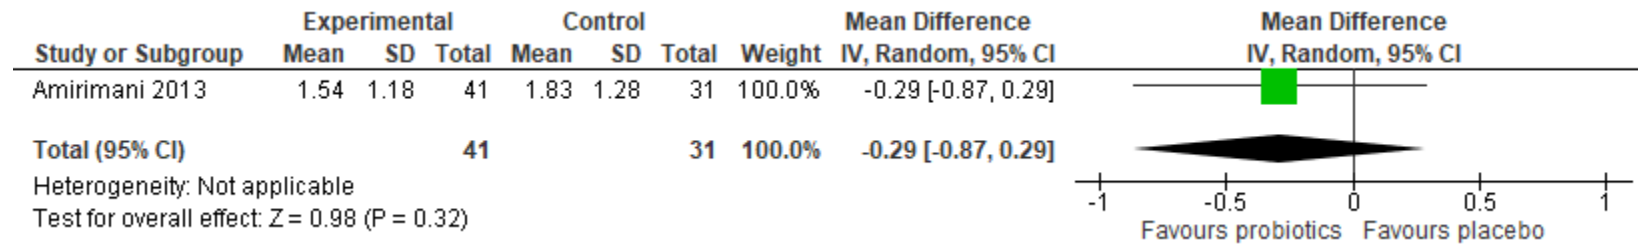

**Question:** *Lactobacillus reuteri* DSM 17938 compared to placebo for children with IBS (6j)

**Bibliography:** Jadrešin 2017

| Certainty assessment |              |              |               |              |             |                      | № of patients               |         | Effect            |                   | Certainty | Importance |
|----------------------|--------------|--------------|---------------|--------------|-------------|----------------------|-----------------------------|---------|-------------------|-------------------|-----------|------------|
| № of studies         | Study design | Risk of bias | Inconsistency | Indirectness | Imprecision | Other considerations | <i>L. reuteri</i> DSM 17938 | placebo | Relative (95% CI) | Absolute (95% CI) |           |            |

**Median Number of Days Without Pain**

|   |                   |                           |             |             |                      |      |                                                                  |  |                  |          |
|---|-------------------|---------------------------|-------------|-------------|----------------------|------|------------------------------------------------------------------|--|------------------|----------|
| 1 | randomised trials | very serious <sup>a</sup> | not serious | not serious | serious <sup>b</sup> | none | Probiotic 89.5 (5-108 days; n=26), placebo 51 (0-107 days; n=29) |  | ⊕○○○<br>VERY LOW | CRITICAL |
|---|-------------------|---------------------------|-------------|-------------|----------------------|------|------------------------------------------------------------------|--|------------------|----------|

**Severity of Abdominal Pain at 4 months**

|   |                   |                           |             |             |                      |      |                                                      |  |                  |          |
|---|-------------------|---------------------------|-------------|-------------|----------------------|------|------------------------------------------------------|--|------------------|----------|
| 1 | randomised trials | very serious <sup>a</sup> | not serious | not serious | serious <sup>b</sup> | none | Probiotic 0.21 (0-1.7; n=26), placebo 0.6 (0.2 n=29) |  | ⊕○○○<br>VERY LOW | CRITICAL |
|---|-------------------|---------------------------|-------------|-------------|----------------------|------|------------------------------------------------------|--|------------------|----------|

**CI:** Confidence interval

**Explanations**

a. High risk of attrition bias

b. Few events reported do not meet the optimal information size and suggest fragility in the estimate.

## Question: *Lactobacillus gasseri* BNR17 compared to placebo for treatment of IBS (6k)

Bibliography: Shin 2018, Kim 2018

| Certainty assessment |              |              |               |              |             |                      | № of patients           |         | Effect            |                   | Certainty | Importance |
|----------------------|--------------|--------------|---------------|--------------|-------------|----------------------|-------------------------|---------|-------------------|-------------------|-----------|------------|
| № of studies         | Study design | Risk of bias | Inconsistency | Indirectness | Imprecision | Other considerations | <i>L. gasseri</i> BNR17 | Placebo | Relative (95% CI) | Absolute (95% CI) |           |            |

### Change in Abdominal Pain Scores from Baseline

|   |                   |                           |             |             |                      |      |                                                                                                                                                                                                                           |                  |          |
|---|-------------------|---------------------------|-------------|-------------|----------------------|------|---------------------------------------------------------------------------------------------------------------------------------------------------------------------------------------------------------------------------|------------------|----------|
| 2 | randomised trials | very serious <sup>a</sup> | not serious | not serious | serious <sup>b</sup> | none | Shin 2018 reports abdominal pain score reduction in probiotic arm of 2.4 (from 3.6 to 1.2; n=24) compared with placebo arm of 1.8 (from 4.7 to 2.9; n=27) at week 8. Kim 2018 suggests benefit in intervention arm (n=55) | ⊕○○○<br>VERY LOW | CRITICAL |
|---|-------------------|---------------------------|-------------|-------------|----------------------|------|---------------------------------------------------------------------------------------------------------------------------------------------------------------------------------------------------------------------------|------------------|----------|

### Change in Disturbed Daily Life Scores

|   |                   |                           |             |             |                      |      |                                                                                                                                                                  |                  |          |
|---|-------------------|---------------------------|-------------|-------------|----------------------|------|------------------------------------------------------------------------------------------------------------------------------------------------------------------|------------------|----------|
| 1 | randomised trials | very serious <sup>a</sup> | not serious | not serious | serious <sup>b</sup> | none | Shin 2018 reports abdominal pain score reduction in probiotic arm of 2 (from 6.8 to 4.8; n=24) compared with placebo arm of 2 (from 5.5 to 3.5; n=27) at week 8. | ⊕○○○<br>VERY LOW | CRITICAL |
|---|-------------------|---------------------------|-------------|-------------|----------------------|------|------------------------------------------------------------------------------------------------------------------------------------------------------------------|------------------|----------|

CI: Confidence interval

### Explanations

a. High risk of selection and attrition bias

b. Few events reported do not meet the optimal information size and suggest fragility in the estimate; the narrative suggests there may not be a meaningful difference between groups.

**Question:** *Saccharomyces cerevisiae* CNCM I-3856 compared to placebo for treatment of IBS in adults (6I)

**Bibliography:** Pineton 2015, Spiller 2016

| Certainty assessment |              |              |               |              |             |                      | No of patients                   |         | Effect            |                   | Certainty | Importance |
|----------------------|--------------|--------------|---------------|--------------|-------------|----------------------|----------------------------------|---------|-------------------|-------------------|-----------|------------|
| No of studies        | Study design | Risk of bias | Inconsistency | Indirectness | Imprecision | Other considerations | <i>S. cerevisiae</i> CNCM I-3856 | Placebo | Relative (95% CI) | Absolute (95% CI) |           |            |

**Change in Abdominal Pain from Baseline (IBS all subtypes)**

|   |                   |                      |             |             |                      |      |    |    |   |                                                    |             |          |
|---|-------------------|----------------------|-------------|-------------|----------------------|------|----|----|---|----------------------------------------------------|-------------|----------|
| 1 | randomised trials | serious <sup>a</sup> | not serious | not serious | serious <sup>c</sup> | none | 86 | 93 | - | mean <b>0.35 lower</b> (0.75 lower to 0.05 higher) | ⊕⊕○○<br>LOW | CRITICAL |
|---|-------------------|----------------------|-------------|-------------|----------------------|------|----|----|---|----------------------------------------------------|-------------|----------|

**Response to Treatment**

|   |                   |                      |             |             |                      |      |                |                |                               |                                                      |             |          |
|---|-------------------|----------------------|-------------|-------------|----------------------|------|----------------|----------------|-------------------------------|------------------------------------------------------|-------------|----------|
| 1 | randomised trials | serious <sup>b</sup> | not serious | not serious | serious <sup>c</sup> | none | 57/177 (32.2%) | 47/175 (26.9%) | <b>RR 1.20</b> (0.87 to 1.66) | <b>54 more per 1,000</b> (from 35 fewer to 177 more) | ⊕⊕○○<br>LOW | CRITICAL |
|---|-------------------|----------------------|-------------|-------------|----------------------|------|----------------|----------------|-------------------------------|------------------------------------------------------|-------------|----------|

**Abdominal Pain Scores at Study End in IBS-C**

| Certainty assessment |                   |                      |               |              |                      |                      | No of patients            |         | Effect            |                                                      | Certainty   | Importance |
|----------------------|-------------------|----------------------|---------------|--------------|----------------------|----------------------|---------------------------|---------|-------------------|------------------------------------------------------|-------------|------------|
| No of studies        | Study design      | Risk of bias         | Inconsistency | Indirectness | Imprecision          | Other considerations | S. cerevisiae CNCM I-3856 | Placebo | Relative (95% CI) | Absolute (95% CI)                                    |             |            |
| 1                    | randomised trials | serious <sup>b</sup> | not serious   | not serious  | serious <sup>c</sup> | none                 | 82                        | 98      | -                 | mean <b>0.3 lower</b><br>(0.67 lower to 0.07 higher) | ⊕⊕○○<br>LOW | CRITICAL   |

#### Abdominal Pain Scores at Study End in IBS-D

|   |                   |                      |             |             |                      |      |    |    |   |                                                       |             |          |
|---|-------------------|----------------------|-------------|-------------|----------------------|------|----|----|---|-------------------------------------------------------|-------------|----------|
| 1 | randomised trials | serious <sup>b</sup> | not serious | not serious | serious <sup>c</sup> | none | 41 | 38 | - | mean <b>0.1 higher</b><br>(0.54 lower to 0.74 higher) | ⊕⊕○○<br>LOW | CRITICAL |
|---|-------------------|----------------------|-------------|-------------|----------------------|------|----|----|---|-------------------------------------------------------|-------------|----------|

#### Bloating Scores at Study End IBS-C

|   |                   |                      |             |             |                      |      |    |    |   |                                                     |             |          |
|---|-------------------|----------------------|-------------|-------------|----------------------|------|----|----|---|-----------------------------------------------------|-------------|----------|
| 1 | randomised trials | serious <sup>b</sup> | not serious | not serious | serious <sup>c</sup> | none | 82 | 98 | - | mean <b>0.5 lower</b><br>(0.87 lower to 0.13 lower) | ⊕⊕○○<br>LOW | CRITICAL |
|---|-------------------|----------------------|-------------|-------------|----------------------|------|----|----|---|-----------------------------------------------------|-------------|----------|

#### Bloating Scores at Study End IBS-D



| Certainty assessment |                   |                      |               |              |                      |                      | No of patients            |         | Effect            |                                                     | Certainty   | Importance |
|----------------------|-------------------|----------------------|---------------|--------------|----------------------|----------------------|---------------------------|---------|-------------------|-----------------------------------------------------|-------------|------------|
| No of studies        | Study design      | Risk of bias         | Inconsistency | Indirectness | Imprecision          | Other considerations | S. cerevisiae CNCM I-3856 | Placebo | Relative (95% CI) | Absolute (95% CI)                                   |             |            |
| 1                    | randomised trials | serious <sup>b</sup> | not serious   | not serious  | serious <sup>c</sup> | none                 | 41                        | 38      | -                 | mean <b>0 higher</b><br>(0.64 lower to 0.64 higher) | ⊕⊕○○<br>LOW | CRITICAL   |

#### Composite Score IBS -C

|   |                   |                      |             |             |                      |      |    |    |   |                                                     |             |          |
|---|-------------------|----------------------|-------------|-------------|----------------------|------|----|----|---|-----------------------------------------------------|-------------|----------|
| 1 | randomised trials | serious <sup>b</sup> | not serious | not serious | serious <sup>c</sup> | none | 82 | 98 | - | mean <b>1.3 lower</b><br>(2.59 lower to 0.01 lower) | ⊕⊕○○<br>LOW | CRITICAL |
|---|-------------------|----------------------|-------------|-------------|----------------------|------|----|----|---|-----------------------------------------------------|-------------|----------|

#### Composite Score IBS -D

|   |                   |                      |             |             |                      |      |    |    |   |                                                       |             |          |
|---|-------------------|----------------------|-------------|-------------|----------------------|------|----|----|---|-------------------------------------------------------|-------------|----------|
| 1 | randomised trials | serious <sup>b</sup> | not serious | not serious | serious <sup>c</sup> | none | 41 | 38 | - | mean <b>0.5 higher</b><br>(1.65 lower to 2.65 higher) | ⊕⊕○○<br>LOW | CRITICAL |
|---|-------------------|----------------------|-------------|-------------|----------------------|------|----|----|---|-------------------------------------------------------|-------------|----------|

CI: Confidence interval; RR: Risk ratio

#### Explanations

- a. Unclear reporting, detection bias
- b. Unclear detection bias
- c. Few events reported do not meet the optimal information size and suggest fragility in the estimate.

Change in Abdominal Pain from Baseline (IBS all subtypes; lower = better)

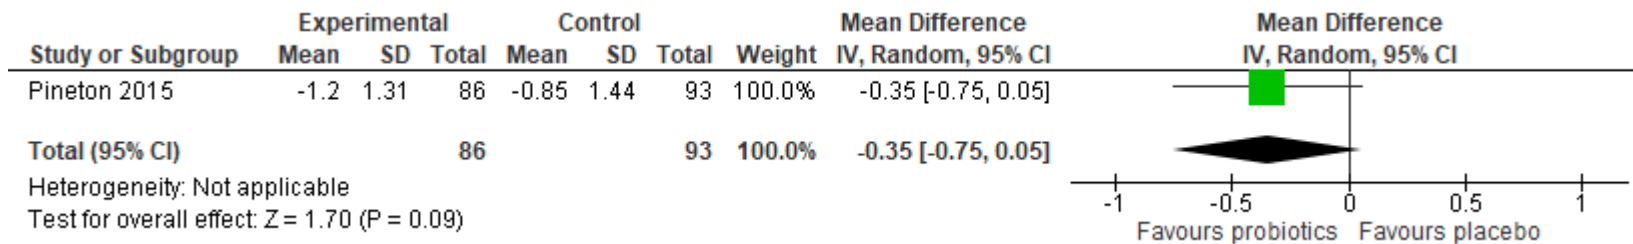

Response to treatment

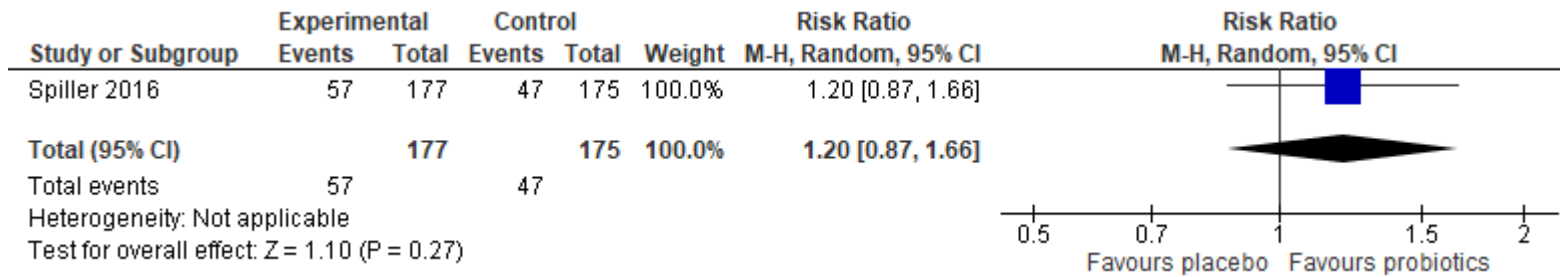

Abdominal Pain Scores at Treatment End in IBS-C (lower = better)

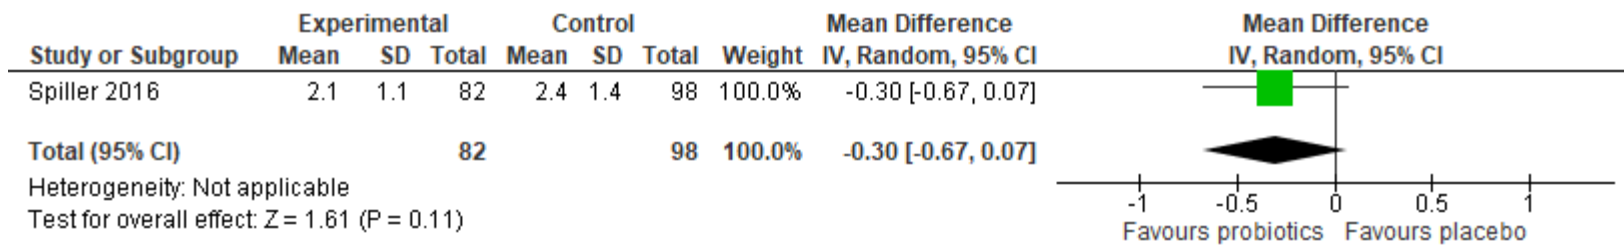

Abdominal Pain Scores at Treatment End in IBS-D (lower = better)

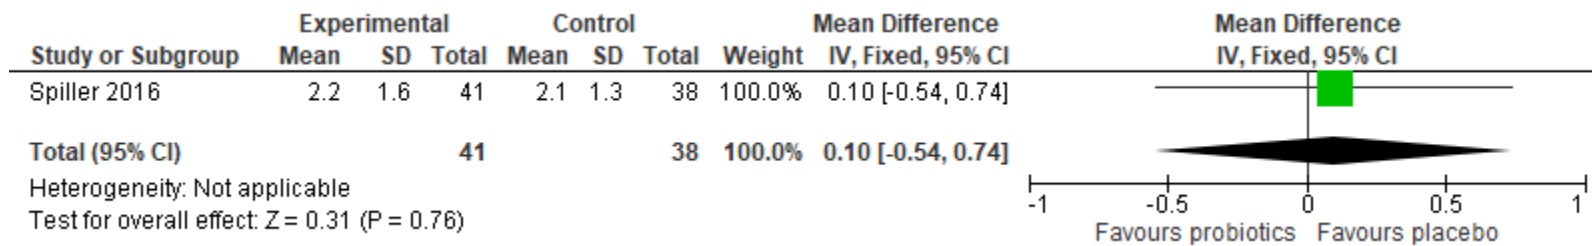

Bloating Scores at Study End IBS-C (lower = better)

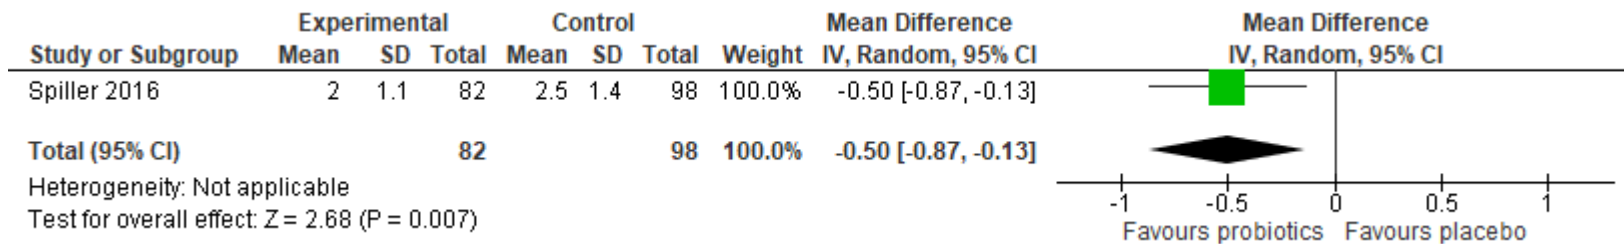

Bloating Scores at Study End IBS-D (lower = better)

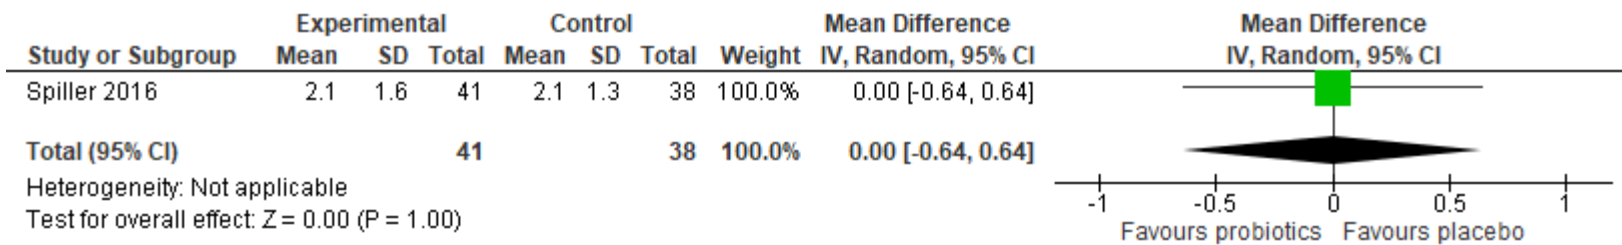

Composite Score IBS-C (lower = better)

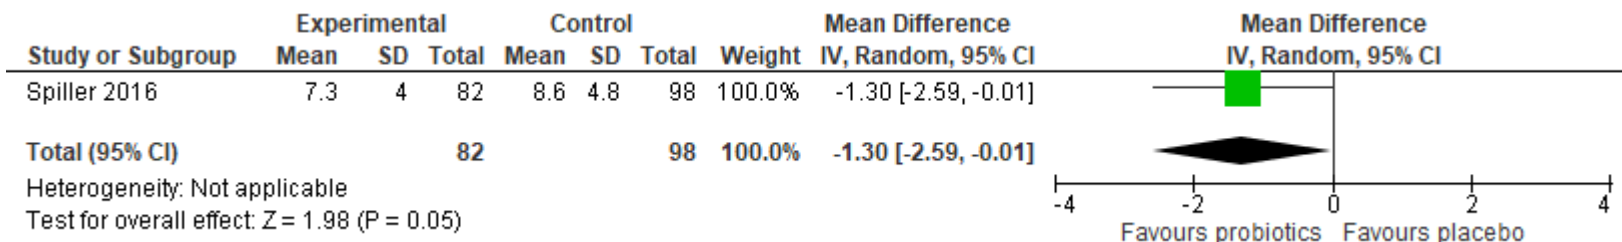

Composite Score IBS-D (lower = better)

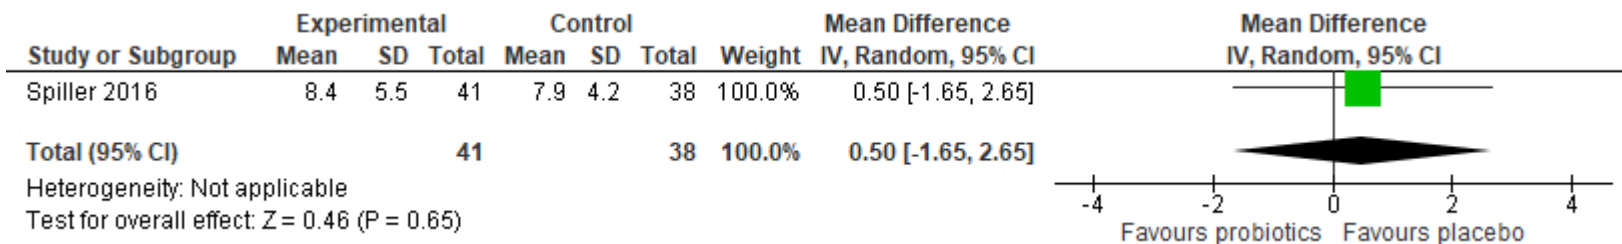

**Question:** *Lactobacillus casei* Shirota compared to placebo for adults with IBS (6m)

**Bibliography:** Thijssen 2016

| Certainty assessment |              |              |               |              |             |                      | No of patients  |         | Effect            |                   | Certainty | Importance |
|----------------------|--------------|--------------|---------------|--------------|-------------|----------------------|-----------------|---------|-------------------|-------------------|-----------|------------|
| No of studies        | Study design | Risk of bias | Inconsistency | Indirectness | Imprecision | Other considerations | <i>L. casei</i> | Placebo | Relative (95% CI) | Absolute (95% CI) |           |            |

**Composite QOL at end of treatment**

|   |                   |                      |             |             |                      |      |    |    |   |                                              |             |          |
|---|-------------------|----------------------|-------------|-------------|----------------------|------|----|----|---|----------------------------------------------|-------------|----------|
| 1 | randomised trials | serious <sup>a</sup> | not serious | not serious | serious <sup>b</sup> | none | 39 | 41 | - | mean <b>0</b><br>(1.75 lower to 1.75 higher) | ⊕⊕○○<br>LOW | CRITICAL |
|---|-------------------|----------------------|-------------|-------------|----------------------|------|----|----|---|----------------------------------------------|-------------|----------|

**Mean Number of Symptom Free Days at end of treatment**

|   |                   |                      |             |             |                      |      |    |    |   |                                                         |             |          |
|---|-------------------|----------------------|-------------|-------------|----------------------|------|----|----|---|---------------------------------------------------------|-------------|----------|
| 1 | randomised trials | serious <sup>a</sup> | not serious | not serious | serious <sup>b</sup> | none | 39 | 41 | - | mean <b>0.2 SD lower</b><br>(1.91 lower to 1.51 higher) | ⊕⊕○○<br>LOW | CRITICAL |
|---|-------------------|----------------------|-------------|-------------|----------------------|------|----|----|---|---------------------------------------------------------|-------------|----------|

**Overall Response at End of Treatment**

|   |                   |                      |             |             |                      |      |                  |                  |                                  |                                                          |             |          |
|---|-------------------|----------------------|-------------|-------------|----------------------|------|------------------|------------------|----------------------------------|----------------------------------------------------------|-------------|----------|
| 1 | randomised trials | serious <sup>a</sup> | not serious | not serious | serious <sup>b</sup> | none | 14/39<br>(35.9%) | 12/41<br>(29.3%) | <b>RR 1.23</b><br>(0.65 to 2.31) | <b>67 more per 1,000</b><br>(from 102 fewer to 383 more) | ⊕⊕○○<br>LOW | CRITICAL |
|---|-------------------|----------------------|-------------|-------------|----------------------|------|------------------|------------------|----------------------------------|----------------------------------------------------------|-------------|----------|

**CI:** Confidence interval; **RR:** Risk ratio

## Explanations

- a. Unclear risk of selection, performance, and detection bias
- b. Few events reported do not meet the optimal information size and suggest fragility in the estimate.

Composite QOL at end of treatment (higher = better; week 8)

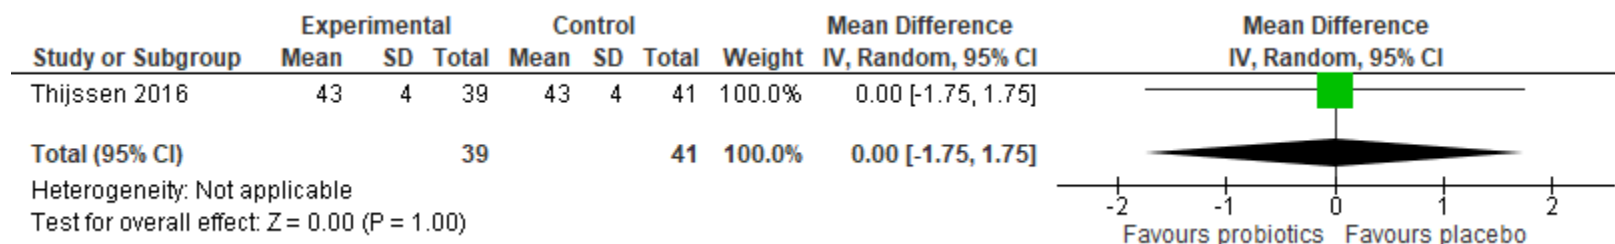

Mean Number of Symptom Free Days at end of treatment (week 8)

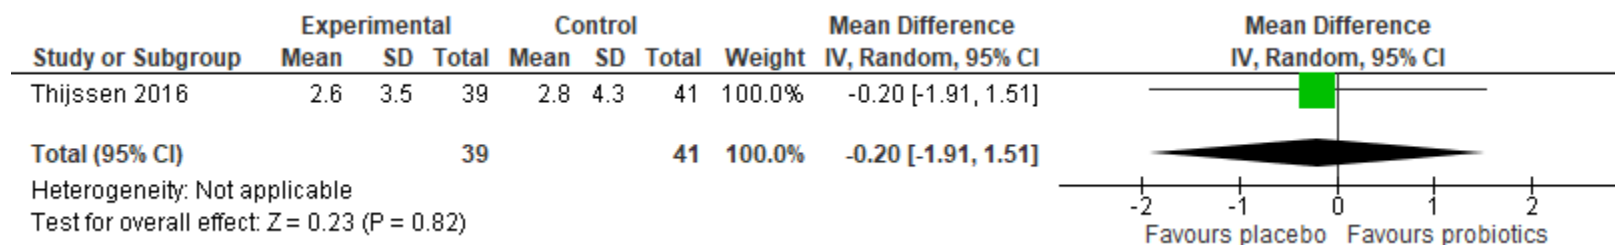

Overall Response at End of Treatment

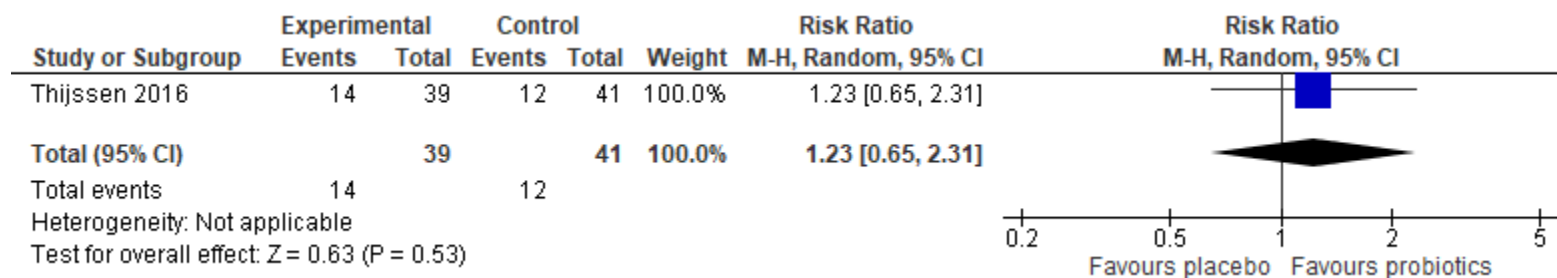

Question: *Lactobacillus rhamnosus* compared to placebo for adults with IBS (6n)

Bibliography: Dapoigny 2012

| Certainty assessment |              |              |               |              |             |                      | No of patients      |         | Effect            |                   | Certainty | Importance |
|----------------------|--------------|--------------|---------------|--------------|-------------|----------------------|---------------------|---------|-------------------|-------------------|-----------|------------|
| No of studies        | Study design | Risk of bias | Inconsistency | Indirectness | Imprecision | Other considerations | <i>L. rhamnosus</i> | Placebo | Relative (95% CI) | Absolute (95% CI) |           |            |

Change in IBS Severity Score from Baseline for *L. rhamnosus* in IBS-C

|   |                   |                           |             |             |                           |      |   |   |   |                                                         |                  |          |
|---|-------------------|---------------------------|-------------|-------------|---------------------------|------|---|---|---|---------------------------------------------------------|------------------|----------|
| 1 | randomised trials | very serious <sup>a</sup> | not serious | not serious | very serious <sup>b</sup> | none | 4 | 7 | - | mean <b>52.60 higher</b> (28.69 lower to 133.89 higher) | ⊕○○○<br>VERY LOW | CRITICAL |
|---|-------------------|---------------------------|-------------|-------------|---------------------------|------|---|---|---|---------------------------------------------------------|------------------|----------|

Change in IBS Severity Score from Baseline for *L. rhamnosus* in IBS-D

|   |                   |                           |             |             |                           |      |   |   |   |                                                       |                  |          |
|---|-------------------|---------------------------|-------------|-------------|---------------------------|------|---|---|---|-------------------------------------------------------|------------------|----------|
| 1 | randomised trials | very serious <sup>a</sup> | not serious | not serious | very serious <sup>b</sup> | none | 7 | 8 | - | mean <b>103.1 lower</b> (214.18 lower to 7.98 higher) | ⊕○○○<br>VERY LOW | CRITICAL |
|---|-------------------|---------------------------|-------------|-------------|---------------------------|------|---|---|---|-------------------------------------------------------|------------------|----------|

Proportion of Patients with severe symptoms at end of treatment (*L. rhamnosus*)

| Certainty assessment |                   |                           |               |              |                           |                      | № of patients       |              | Effect                           |                                                           | Certainty        | Importance |
|----------------------|-------------------|---------------------------|---------------|--------------|---------------------------|----------------------|---------------------|--------------|----------------------------------|-----------------------------------------------------------|------------------|------------|
| № of studies         | Study design      | Risk of bias              | Inconsistency | Indirectness | Imprecision               | Other considerations | <i>L. rhamnosus</i> | Placebo      | Relative (95% CI)                | Absolute (95% CI)                                         |                  |            |
| 1                    | randomised trials | very serious <sup>a</sup> | not serious   | not serious  | very serious <sup>b</sup> | none                 | 4/25 (16.0%)        | 5/25 (20.0%) | <b>RR 0.80</b><br>(0.24 to 2.64) | <b>40 fewer per 1,000</b><br>(from 152 fewer to 328 more) | ⊕○○○<br>VERY LOW | CRITICAL   |

CI: Confidence interval; RR: Risk ratio

### Explanations

a. High risk selection bias

b. Few events reported do not meet the optimal information size and suggest fragility in the estimate. The 95% CI includes the potential for both benefit and harm.

Change in IBS Severity Score from Baseline for *L. rhamnosus* in IBS-C

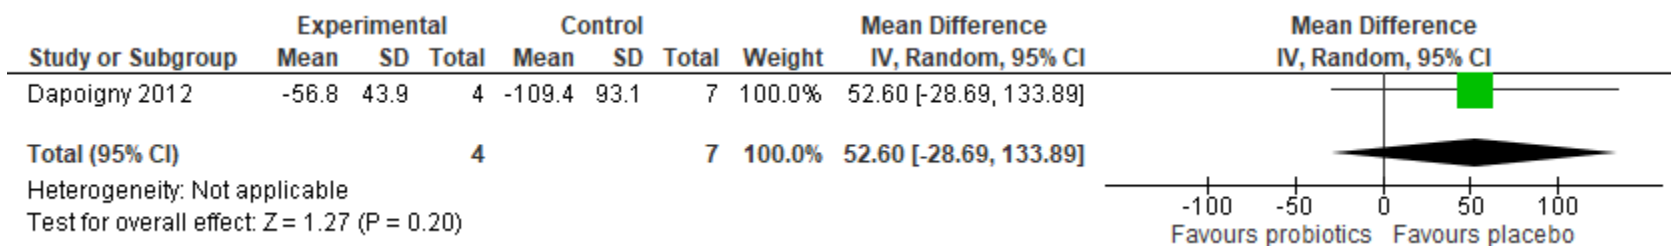

Change in IBS Severity Score from Baseline for *L. rhamnosus* in IBS-D



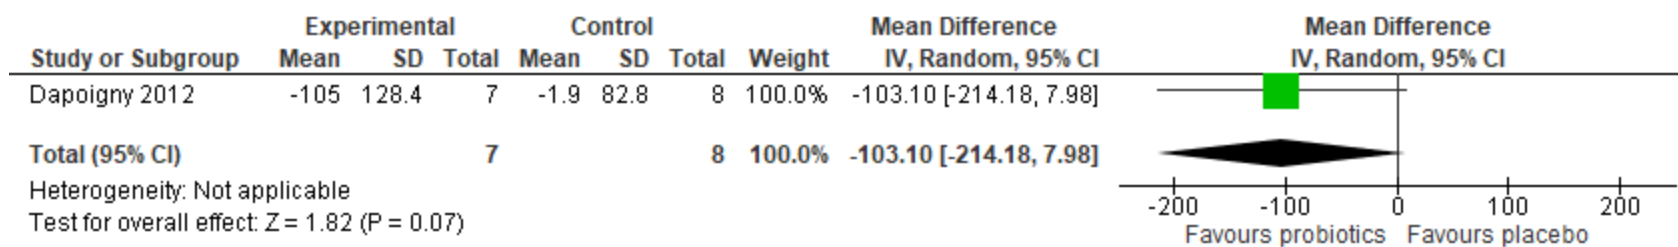

Proportion of Patients with severe symptoms at end of treatment (*L. rhamnosus*)

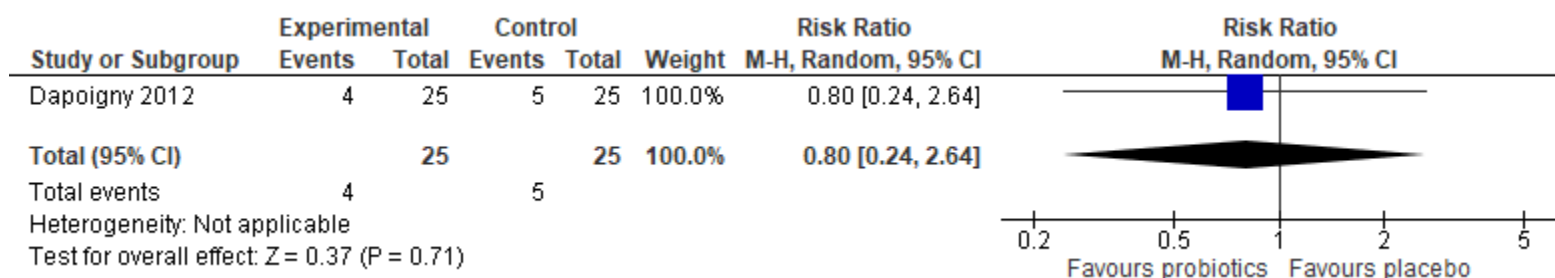

**Question:** *Lactobacillus acidophilus* SDC 2012 and 2013 compared to placebo for adults with IBS (6o)

**Bibliography:** Sinn 2008

| Certainty assessment |              |              |               |              |             |                      | No of patients                          |         | Effect            |                   | Certainty | Importance |
|----------------------|--------------|--------------|---------------|--------------|-------------|----------------------|-----------------------------------------|---------|-------------------|-------------------|-----------|------------|
| No of studies        | Study design | Risk of bias | Inconsistency | Indirectness | Imprecision | Other considerations | <i>L. acidophilus</i> SDC 2012 and 2013 | Placebo | Relative (95% CI) | Absolute (95% CI) |           |            |

**Abdominal pain symptom response**

|   |                   |                      |             |             |                      |      |               |              |                               |                                                        |             |          |
|---|-------------------|----------------------|-------------|-------------|----------------------|------|---------------|--------------|-------------------------------|--------------------------------------------------------|-------------|----------|
| 1 | randomised trials | serious <sup>a</sup> | not serious | not serious | serious <sup>b</sup> | none | 16/20 (80.0%) | 7/20 (35.0%) | <b>RR 2.29</b> (1.21 to 4.32) | <b>451 more per 1,000</b> (from 73 more to 1,000 more) | ⊕⊕○○<br>LOW | CRITICAL |
|---|-------------------|----------------------|-------------|-------------|----------------------|------|---------------|--------------|-------------------------------|--------------------------------------------------------|-------------|----------|

**CI:** Confidence interval; **RR:** Risk ratio

**Explanations**

- a. Unclear risk of detection and reporting bias
- b. Few events reported do not meet the optimal information size and suggest fragility in the estimate.

Proportion of Response (i.e. improvement) of Abdominal Pain

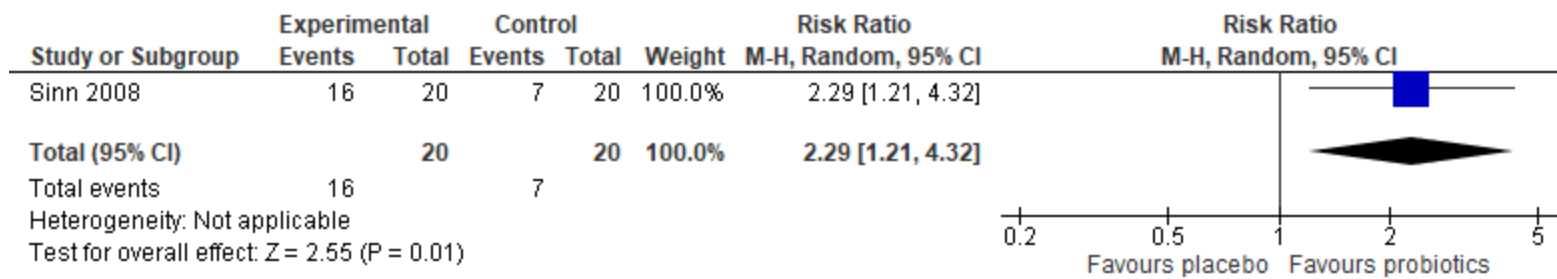

**Question:** *Bifidobacterium animalis* subsp. *lactis* I-2494 + *Streptococcus salivarius* subsp. *thermophilus* I-1630 + *Lactobacillus delbrueckii* subsp. *bulgaricus* I-1632 and I-1519 compared to placebo for adults with IBS (6p)

**Bibliography:** Roberts 2013

| Certainty assessment |              |              |               |              |             |                      | No of patients                                                                                                                                                             |         | Effect            |                   | Certainty | Importance |
|----------------------|--------------|--------------|---------------|--------------|-------------|----------------------|----------------------------------------------------------------------------------------------------------------------------------------------------------------------------|---------|-------------------|-------------------|-----------|------------|
| No of studies        | Study design | Risk of bias | Inconsistency | Indirectness | Imprecision | Other considerations | <i>B. animalis</i> subsp. <i>lactis</i> I-2494 + <i>S. salivarius</i> subsp. <i>thermophilus</i> I-1630 + <i>L. delbrueckii</i> subsp. <i>bulgaricus</i> I-1632 and I-1519 | Placebo | Relative (95% CI) | Absolute (95% CI) |           |            |

**Symptom relief at Week 4**

|   |                   |             |             |             |                             |      |               |               |                                  |                                                          |             |          |
|---|-------------------|-------------|-------------|-------------|-----------------------------|------|---------------|---------------|----------------------------------|----------------------------------------------------------|-------------|----------|
| 1 | randomised trials | not serious | not serious | not serious | very serious <sup>a,b</sup> | none | 34/60 (56.7%) | 26/49 (53.1%) | <b>RR 1.07</b><br>(0.76 to 1.51) | <b>37 more per 1,000</b><br>(from 127 fewer to 271 more) | ⊕⊕○○<br>LOW | CRITICAL |
|---|-------------------|-------------|-------------|-------------|-----------------------------|------|---------------|---------------|----------------------------------|----------------------------------------------------------|-------------|----------|

**Mean Change from Baseline to Week 4 in IBS Symptom Severity Score**

| Certainty assessment |                   |              |               |              |                             |                      | No of patients                                                                                                                                                             |         | Effect            |                                                       | Certainty   | Importance |
|----------------------|-------------------|--------------|---------------|--------------|-----------------------------|----------------------|----------------------------------------------------------------------------------------------------------------------------------------------------------------------------|---------|-------------------|-------------------------------------------------------|-------------|------------|
| No of studies        | Study design      | Risk of bias | Inconsistency | Indirectness | Imprecision                 | Other considerations | <i>B. animalis</i> subsp. <i>lactis</i> I-2494 + <i>S. salivarius</i> subsp. <i>thermophilus</i> I-1630 + <i>L. delbrueckii</i> subsp. <i>bulgaricus</i> I-1632 and I-1519 | Placebo | Relative (95% CI) | Absolute (95% CI)                                     |             |            |
| 1                    | randomised trials | not serious  | not serious   | not serious  | very serious <sup>a,b</sup> | none                 | 41                                                                                                                                                                         | 44      | -                 | mean <b>22.24 lower</b> (56.43 lower to 11.95 higher) | ⊕⊕○○<br>LOW | CRITICAL   |

**Mean Change from Baseline to Week 4 in Birmingham IBS Symptoms Scale**

|   |                   |             |             |             |                             |      |    |    |   |                                                    |             |          |
|---|-------------------|-------------|-------------|-------------|-----------------------------|------|----|----|---|----------------------------------------------------|-------------|----------|
| 1 | randomised trials | not serious | not serious | not serious | very serious <sup>a,b</sup> | none | 60 | 49 | - | mean <b>2.18 lower</b> (6.32 lower to 1.96 higher) | ⊕⊕○○<br>LOW | CRITICAL |
|---|-------------------|-------------|-------------|-------------|-----------------------------|------|----|----|---|----------------------------------------------------|-------------|----------|

**Mean Change in IBD QOL at Week 4**

| Certainty assessment |                   |              |               |              |                             |                      | № of patients                                                                                                                                                              | Effect  |                   | Certainty                                           | Importance  |                   |
|----------------------|-------------------|--------------|---------------|--------------|-----------------------------|----------------------|----------------------------------------------------------------------------------------------------------------------------------------------------------------------------|---------|-------------------|-----------------------------------------------------|-------------|-------------------|
| № of studies         | Study design      | Risk of bias | Inconsistency | Indirectness | Imprecision                 | Other considerations | <i>B. animalis</i> subsp. <i>lactis</i> I-2494 + <i>S. salivarius</i> subsp. <i>thermophilus</i> I-1630 + <i>L. delbrueckii</i> subsp. <i>bulgaricus</i> I-1632 and I-1519 | Placebo | Relative (95% CI) |                                                     |             | Absolute (95% CI) |
| 1                    | randomised trials | not serious  | not serious   | not serious  | very serious <sup>a,b</sup> | none                 | 60                                                                                                                                                                         | 50      | -                 | mean <b>1.91 higher</b> (2.54 lower to 6.36 higher) | ⊕⊕○○<br>LOW | CRITICAL          |

CI: Confidence interval; RR: Risk ratio

### Explanations

- a. The 95% CI includes the potential for both benefit and harm.
- b. Few events reported do not meet the optimal information size and suggest fragility in the estimate.

Symptom relief at week 4

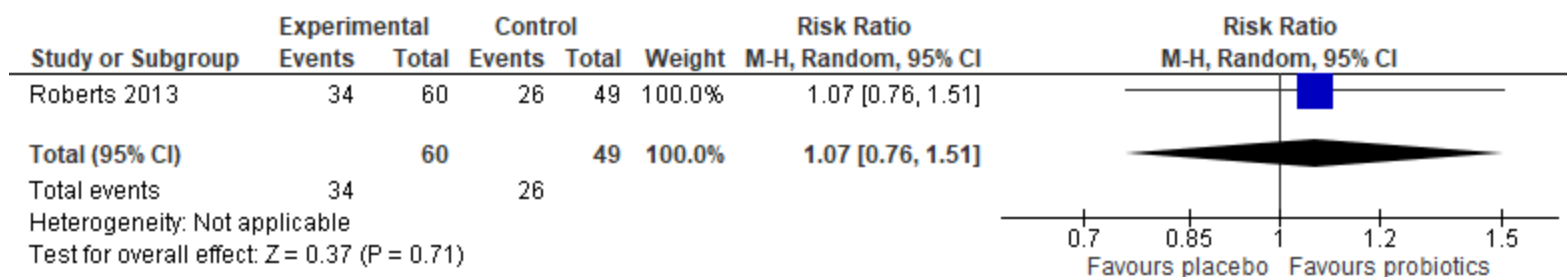

Mean Change from Baseline to Week 4 in IBS Symptom Severity Score (higher score = greater burden)

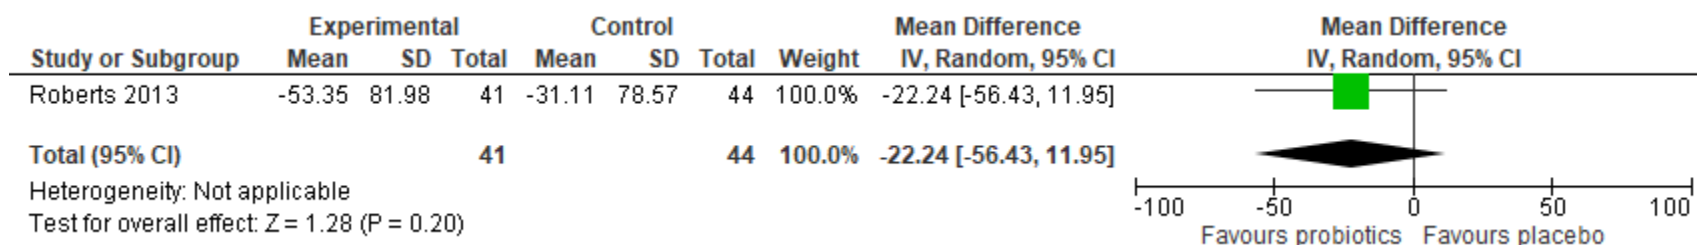

Mean Change from Baseline to Week 4 in Birmingham IBS Symptoms Scale – Total score (higher score = better QoL)

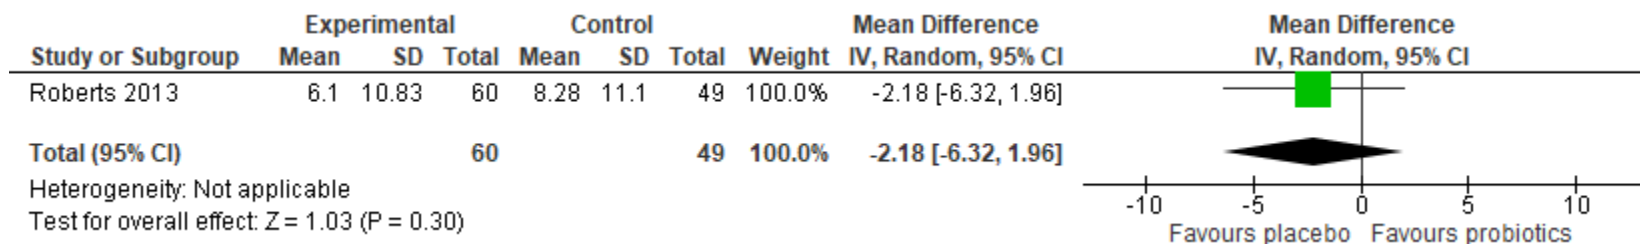

Mean Change in IBD QOL at Week 4 (higher score = better QoL)

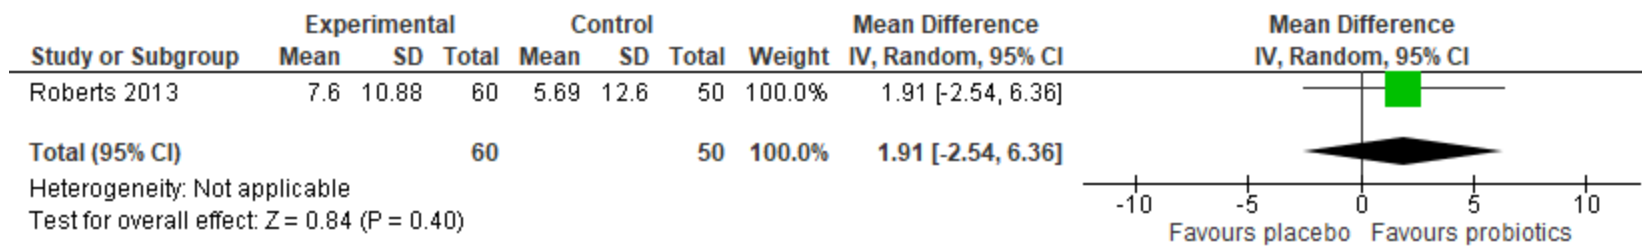



**Question:** *Lactobacillus paracasei* subsp. *paracasei* F-19 + *Lactobacillus acidophilus* LA-5 + *Bifidobacterium animalis* subsp. *lactis* Bb12 compared to placebo for adults with IBS (6q)

**Bibliography:** Begtrup 2013

| Certainty assessment |              |              |               |              |             |                      | № of patients                                                                                                                |         | Effect            |                   | Certainty | Importance |
|----------------------|--------------|--------------|---------------|--------------|-------------|----------------------|------------------------------------------------------------------------------------------------------------------------------|---------|-------------------|-------------------|-----------|------------|
| № of studies         | Study design | Risk of bias | Inconsistency | Indirectness | Imprecision | Other considerations | <i>L. paracasei</i> subsp. <i>paracasei</i> F-19 + <i>L. acidophilus</i> LA-5 + <i>B. animalis</i> subsp. <i>lactis</i> Bb12 | Placebo | Relative (95% CI) | Absolute (95% CI) |           |            |

**Proportion with Response of Symptoms**

|   |                   |             |             |             |                           |      |               |               |                               |                                                       |             |          |
|---|-------------------|-------------|-------------|-------------|---------------------------|------|---------------|---------------|-------------------------------|-------------------------------------------------------|-------------|----------|
| 1 | randomised trials | not serious | not serious | not serious | very serious <sup>a</sup> | none | 35/67 (52.2%) | 26/64 (40.6%) | <b>RR 1.29</b> (0.88 to 1.87) | <b>118 more per 1,000</b> (from 49 fewer to 353 more) | ⊕⊕○○<br>LOW | CRITICAL |
|---|-------------------|-------------|-------------|-------------|---------------------------|------|---------------|---------------|-------------------------------|-------------------------------------------------------|-------------|----------|

**IBD QOL Scores at end of 6 months of treatment**

|   |                   |             |             |             |                           |      |    |    |   |                                    |             |          |
|---|-------------------|-------------|-------------|-------------|---------------------------|------|----|----|---|------------------------------------|-------------|----------|
| 1 | randomised trials | not serious | not serious | not serious | very serious <sup>a</sup> | none | 59 | 49 | - | mean 0 (6.08 lower to 6.08 higher) | ⊕⊕○○<br>LOW | CRITICAL |
|---|-------------------|-------------|-------------|-------------|---------------------------|------|----|----|---|------------------------------------|-------------|----------|

**CI:** Confidence interval; **RR:** Risk ratio

## Explanations

a. Few events reported do not meet the optimal information size and suggest fragility in the estimate.

Proportion with Response of Symptoms

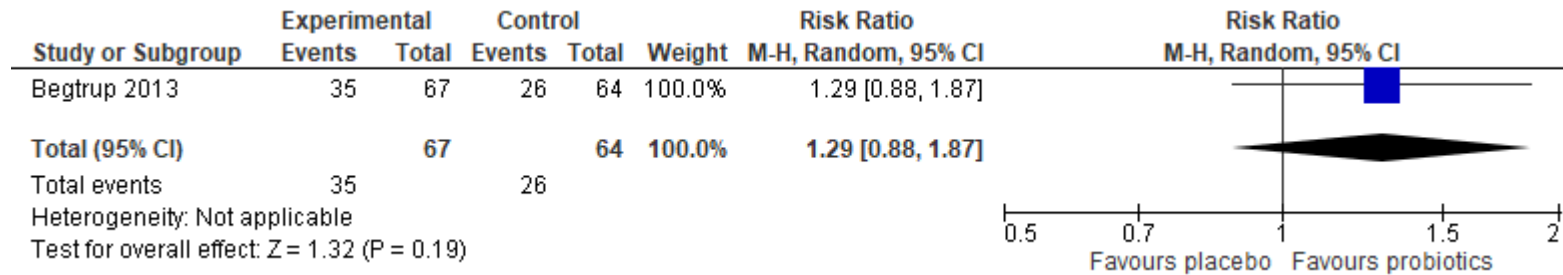

IBD QOL Scores at end of 6 months of treatment

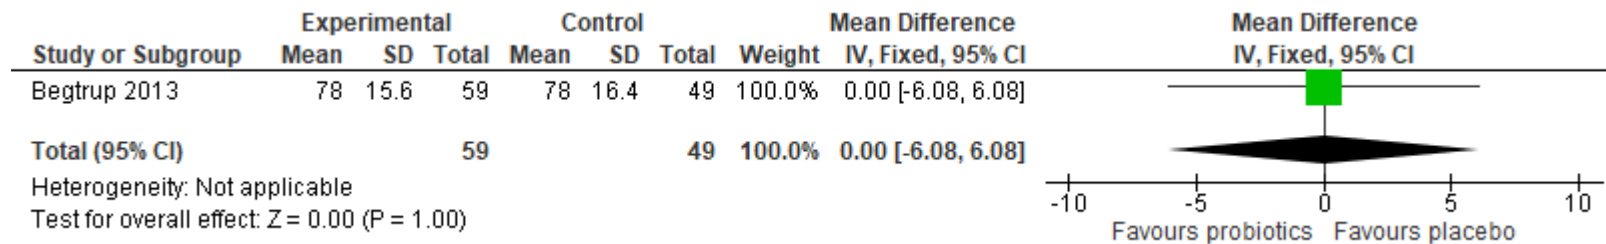

**Question:** *Escherichia coli* DSM 17252 compared to placebo for adults with IBS (6r)

**Bibliography:** Enck 2009

| Certainty assessment |              |              |               |              |             |                      | № of patients            |         | Effect            |                   | Certainty | Importance |
|----------------------|--------------|--------------|---------------|--------------|-------------|----------------------|--------------------------|---------|-------------------|-------------------|-----------|------------|
| № of studies         | Study design | Risk of bias | Inconsistency | Indirectness | Imprecision | Other considerations | <i>E. coli</i> DSM 17252 | Placebo | Relative (95% CI) | Absolute (95% CI) |           |            |

**Response Rate GSS**

|   |                   |                      |             |             |                      |      |                |              |                               |                                                      |             |          |
|---|-------------------|----------------------|-------------|-------------|----------------------|------|----------------|--------------|-------------------------------|------------------------------------------------------|-------------|----------|
| 1 | randomised trials | serious <sup>a</sup> | not serious | not serious | serious <sup>b</sup> | none | 27/148 (18.2%) | 7/150 (4.7%) | <b>RR 3.91</b> (1.76 to 8.70) | <b>136 more per 1,000</b> (from 35 more to 359 more) | ⊕⊕○○<br>LOW | CRITICAL |
|---|-------------------|----------------------|-------------|-------------|----------------------|------|----------------|--------------|-------------------------------|------------------------------------------------------|-------------|----------|

**Response Rate APS**

|   |                   |                      |             |             |                      |      |                |               |                               |                                                      |             |          |
|---|-------------------|----------------------|-------------|-------------|----------------------|------|----------------|---------------|-------------------------------|------------------------------------------------------|-------------|----------|
| 1 | randomised trials | serious <sup>a</sup> | not serious | not serious | serious <sup>b</sup> | none | 28/148 (18.9%) | 10/150 (6.7%) | <b>RR 2.84</b> (1.43 to 5.63) | <b>123 more per 1,000</b> (from 29 more to 309 more) | ⊕⊕○○<br>LOW | CRITICAL |
|---|-------------------|----------------------|-------------|-------------|----------------------|------|----------------|---------------|-------------------------------|------------------------------------------------------|-------------|----------|

**CI:** Confidence interval; **RR:** Risk ratio

**Explanations**

- a. Unclear risk of bias in all domains with the exception of attrition bias (low risk)
- b. Few events reported do not meet the optimal information size and suggest fragility in the estimate.

Response Rate GSS

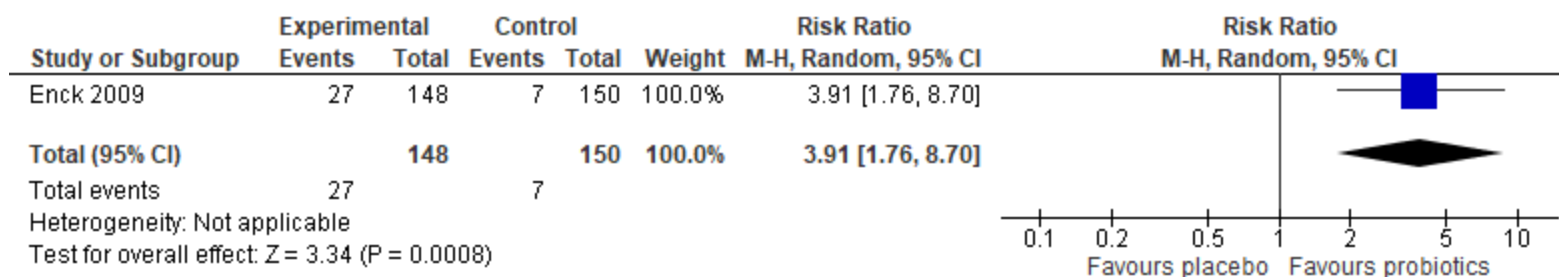

#### Response Rate APS

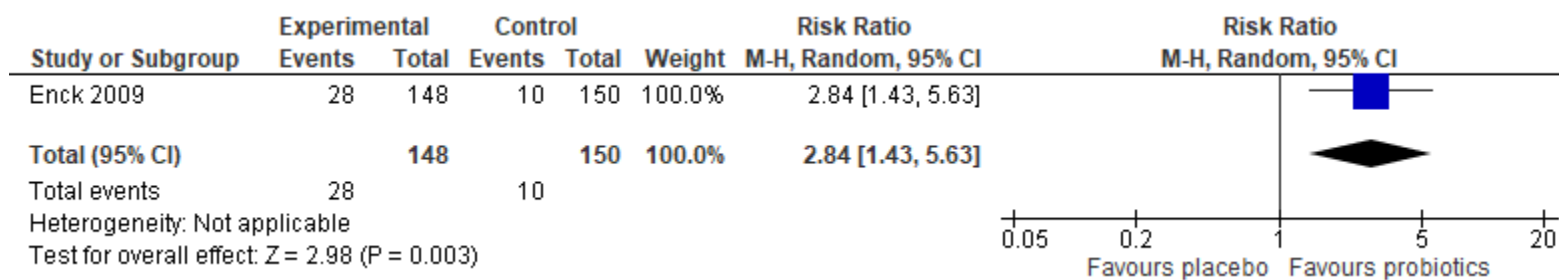

**Question:** *Streptococcus salivarius* subsp. *thermophilus* + *Lactobacillus delbrueckii* subsp. *bulgaricus* + *Lactobacillus acidophilus* + *Bifidobacterium longum* subsp. *longum* compared to placebo for adults with IBS (6s)

**Bibliography:** Zeng 2008

| Certainty assessment |              |              |               |              |             |                      | № of patients                                                                                                                                                    |         | Effect            |                   | Certainty | Importance |
|----------------------|--------------|--------------|---------------|--------------|-------------|----------------------|------------------------------------------------------------------------------------------------------------------------------------------------------------------|---------|-------------------|-------------------|-----------|------------|
| № of studies         | Study design | Risk of bias | Inconsistency | Indirectness | Imprecision | Other considerations | <i>S. salivarius</i> subsp. <i>thermophilus</i> + <i>L. delbrueckii</i> subsp. <i>bulgaricus</i> + <i>L. acidophilus</i> + <i>B. longum</i> subsp. <i>longum</i> | Placebo | Relative (95% CI) | Absolute (95% CI) |           |            |

**Global IBS Symptoms**

|   |                   |                           |             |             |                      |      |    |    |   |                                                   |                  |          |
|---|-------------------|---------------------------|-------------|-------------|----------------------|------|----|----|---|---------------------------------------------------|------------------|----------|
| 1 | randomised trials | very serious <sup>a</sup> | not serious | not serious | serious <sup>b</sup> | none | 14 | 15 | - | mean <b>1.54 lower</b> (2.53 lower to 0.55 lower) | ⊕○○○<br>VERY LOW | CRITICAL |
|---|-------------------|---------------------------|-------------|-------------|----------------------|------|----|----|---|---------------------------------------------------|------------------|----------|

**VAS Abdominal Pain**

| Certainty assessment |                   |                           |               |              |                      |                      | № of patients                                                                                                                                                    |         | Effect            |                                                    | Certainty        | Importance |
|----------------------|-------------------|---------------------------|---------------|--------------|----------------------|----------------------|------------------------------------------------------------------------------------------------------------------------------------------------------------------|---------|-------------------|----------------------------------------------------|------------------|------------|
| № of studies         | Study design      | Risk of bias              | Inconsistency | Indirectness | Imprecision          | Other considerations | <i>S. salivarius</i> subsp. <i>thermophilus</i> + <i>L. delbrueckii</i> subsp. <i>bulgaricus</i> + <i>L. acidophilus</i> + <i>B. longum</i> subsp. <i>longum</i> | Placebo | Relative (95% CI) | Absolute (95% CI)                                  |                  |            |
| 1                    | randomised trials | very serious <sup>a</sup> | not serious   | not serious  | serious <sup>b</sup> | none                 | 14                                                                                                                                                               | 15      | -                 | mean <b>9.31 lower</b> (14.34 lower to 4.28 lower) | ⊕○○○<br>VERY LOW | CRITICAL   |

#### VAS Bloating

|   |                   |                           |             |             |                      |      |    |    |   |                                                     |                  |          |
|---|-------------------|---------------------------|-------------|-------------|----------------------|------|----|----|---|-----------------------------------------------------|------------------|----------|
| 1 | randomised trials | very serious <sup>a</sup> | not serious | not serious | serious <sup>b</sup> | none | 14 | 15 | - | mean <b>2.43 higher</b> (0.66 lower to 5.52 higher) | ⊕○○○<br>VERY LOW | CRITICAL |
|---|-------------------|---------------------------|-------------|-------------|----------------------|------|----|----|---|-----------------------------------------------------|------------------|----------|

CI: Confidence interval

## Explanations

- a. High risk of detection and performance bias
- b. Few events reported do not meet the optimal information size and suggest fragility in the estimate.

Global IBS Symptoms (lower = better; measured at week 4)

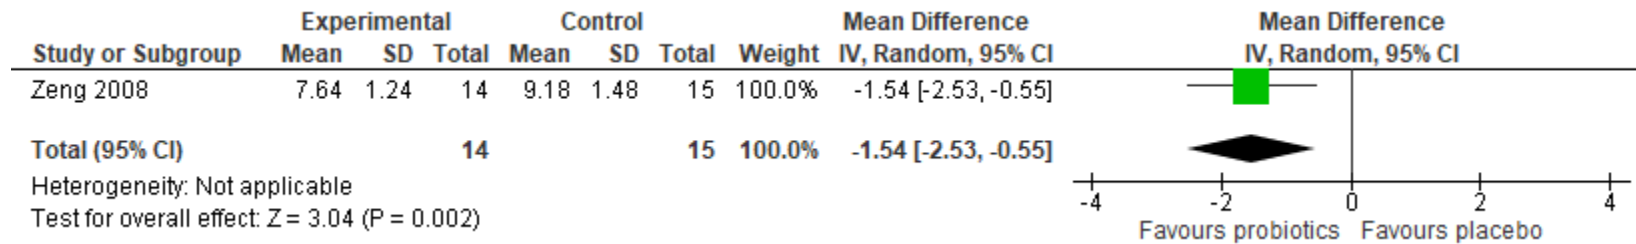

VAS Abdominal Pain (lower = better; measured at week 4)

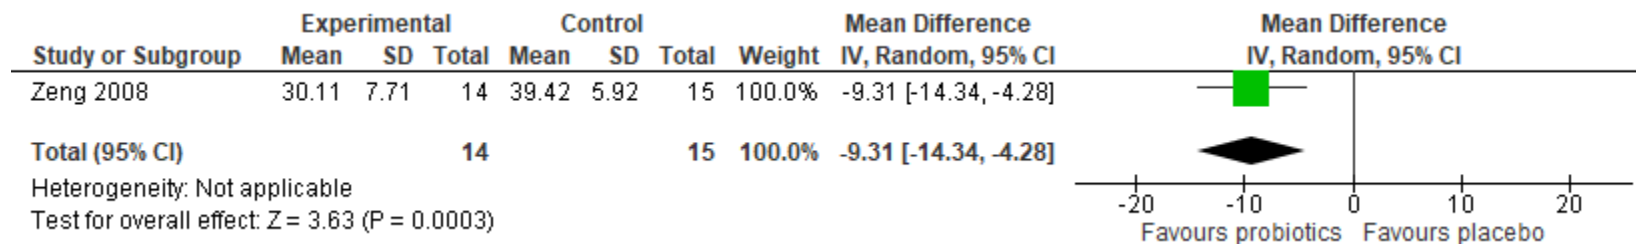

VAS Bloating (lower = better; measured at week 4)

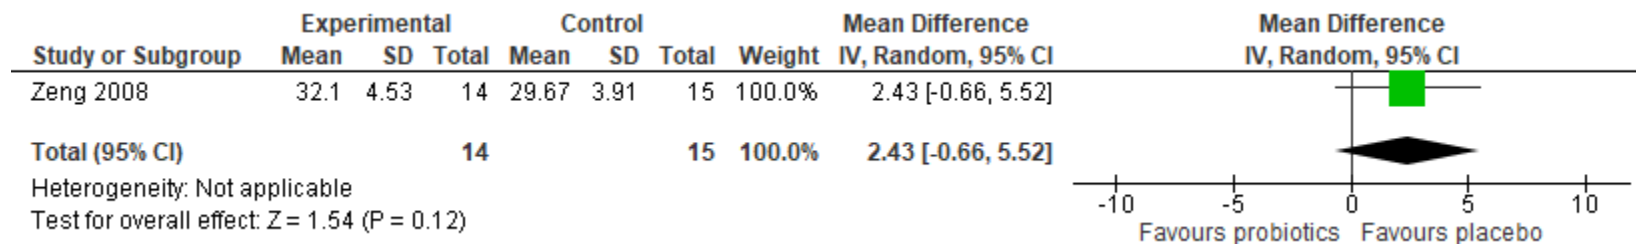

**Question:** *Bifidobacterium longum* subsp. *longum* LA-101 + *Lactobacillus acidophilus* LA-102 + *Lactococcus lactis* LA-103 + *Streptococcus salivarius* subsp. *thermophilus* LA-104 compared to placebo for adults with IBS (6t)

**Bibliography:** Drouault-Holowacz 2008

| Certainty assessment |              |              |               |              |             |                      | No of patients                                                                                                                                                 |         | Effect            |                   | Certainty | Importance |
|----------------------|--------------|--------------|---------------|--------------|-------------|----------------------|----------------------------------------------------------------------------------------------------------------------------------------------------------------|---------|-------------------|-------------------|-----------|------------|
| No of studies        | Study design | Risk of bias | Inconsistency | Indirectness | Imprecision | Other considerations | <i>B. longum</i> subsp. <i>longum</i> LA-101 + <i>L. acidophilus</i> LA-102 + <i>L. lactis</i> LA-103 + <i>S. salivarius</i> subsp. <i>thermophilus</i> LA-104 | Placebo | Relative (95% CI) | Absolute (95% CI) |           |            |

**Relief of Symptoms**

|   |                   |                      |             |             |                      |      |               |               |                                  |                                                      |             |          |
|---|-------------------|----------------------|-------------|-------------|----------------------|------|---------------|---------------|----------------------------------|------------------------------------------------------|-------------|----------|
| 1 | randomised trials | serious <sup>a</sup> | not serious | not serious | serious <sup>b</sup> | none | 21/48 (43.8%) | 22/52 (42.3%) | <b>RR 1.03</b><br>(0.66 to 1.62) | <b>13 more 1,000</b><br>(from 144 fewer to 262 more) | ⊕⊕○○<br>LOW | CRITICAL |
|---|-------------------|----------------------|-------------|-------------|----------------------|------|---------------|---------------|----------------------------------|------------------------------------------------------|-------------|----------|

**Decrease in Abdominal Pain Score (Lower is better)**



| Certainty assessment |                   |                      |               |              |                      |                      | № of patients                                                                                                                                                  |         | Effect            |                                                     | Certainty   | Importance |
|----------------------|-------------------|----------------------|---------------|--------------|----------------------|----------------------|----------------------------------------------------------------------------------------------------------------------------------------------------------------|---------|-------------------|-----------------------------------------------------|-------------|------------|
| № of studies         | Study design      | Risk of bias         | Inconsistency | Indirectness | Imprecision          | Other considerations | <i>B. longum</i> subsp. <i>longum</i> LA-101 + <i>L. acidophilus</i> LA-102 + <i>L. lactis</i> LA-103 + <i>S. salivarius</i> subsp. <i>thermophilus</i> LA-104 | Placebo | Relative (95% CI) | Absolute (95% CI)                                   |             |            |
| 1                    | randomised trials | serious <sup>a</sup> | not serious   | not serious  | serious <sup>b</sup> | none                 | 48                                                                                                                                                             | 52      | -                 | mean <b>17.70 lower</b> (36.46 lower to 1.06 lower) | ⊕⊕○○<br>LOW | CRITICAL   |

CI: Confidence interval; RR: Risk ratio

### Explanations

- a. Unclear risk of reporting, detection, and performance bias
- b. Few events reported do not meet the optimal information size and suggest fragility in the estimate.

Relief of Symptoms

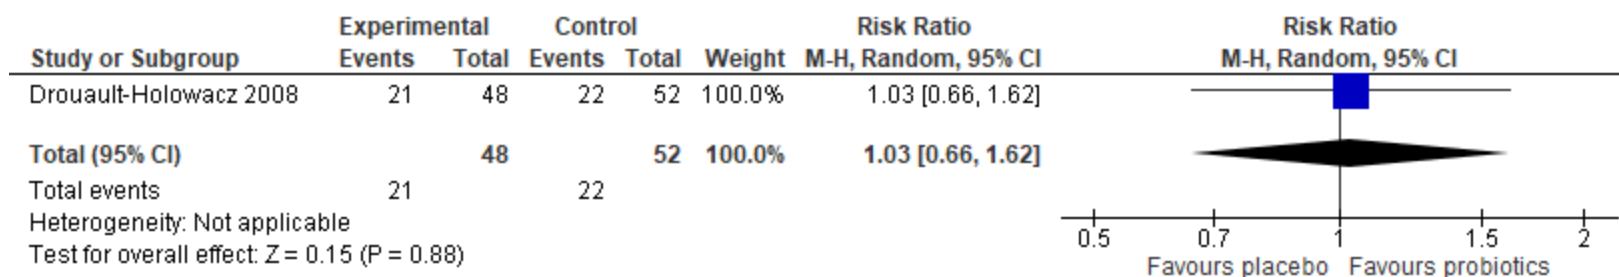

Decrease in Abdominal Pain Scores (lower is better)

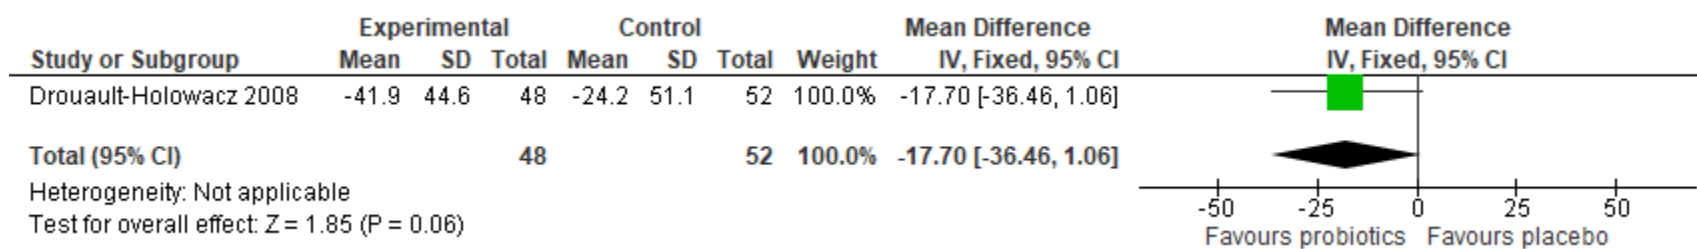

**Question:** *Bifidobacterium longum* subsp. *longum* NCC 3001 compared to placebo for adults with IBS (6u)

**Bibliography:** Pinto-Sanchez 2017

| Certainty assessment |              |              |               |              |             |                      | No of patients                                 |         | Effect            |                   | Certainty | Importance |
|----------------------|--------------|--------------|---------------|--------------|-------------|----------------------|------------------------------------------------|---------|-------------------|-------------------|-----------|------------|
| No of studies        | Study design | Risk of bias | Inconsistency | Indirectness | Imprecision | Other considerations | <i>B. longum</i> subsp. <i>longum</i> NCC 3001 | Placebo | Relative (95% CI) | Absolute (95% CI) |           |            |

**IBS Birmingham Total**

|   |                   |                          |             |             |                           |      |    |    |   |                                                   |             |          |
|---|-------------------|--------------------------|-------------|-------------|---------------------------|------|----|----|---|---------------------------------------------------|-------------|----------|
| 1 | randomised trials | not serious <sup>a</sup> | not serious | not serious | very serious <sup>b</sup> | none | 22 | 22 | - | mean <b>3.8 lower</b> (9.24 lower to 1.64 higher) | ⊕⊕○○<br>LOW | CRITICAL |
|---|-------------------|--------------------------|-------------|-------------|---------------------------|------|----|----|---|---------------------------------------------------|-------------|----------|

**Birmingham Constipation**

|   |                   |                          |             |             |                           |      |    |    |   |                                                  |             |          |
|---|-------------------|--------------------------|-------------|-------------|---------------------------|------|----|----|---|--------------------------------------------------|-------------|----------|
| 1 | randomised trials | not serious <sup>a</sup> | not serious | not serious | very serious <sup>b</sup> | none | 22 | 22 | - | mean <b>1.7 lower</b> (3.31 lower to 0.09 lower) | ⊕⊕○○<br>LOW | CRITICAL |
|---|-------------------|--------------------------|-------------|-------------|---------------------------|------|----|----|---|--------------------------------------------------|-------------|----------|

**Birmingham Diarrhea**

| Certainty assessment |                   |                          |               |              |                           |                      | No of patients                                 |         | Effect            |                                                   | Certainty   | Importance |
|----------------------|-------------------|--------------------------|---------------|--------------|---------------------------|----------------------|------------------------------------------------|---------|-------------------|---------------------------------------------------|-------------|------------|
| No of studies        | Study design      | Risk of bias             | Inconsistency | Indirectness | Imprecision               | Other considerations | <i>B. longum</i> subsp. <i>longum</i> NCC 3001 | Placebo | Relative (95% CI) | Absolute (95% CI)                                 |             |            |
| 1                    | randomised trials | not serious <sup>a</sup> | not serious   | not serious  | very serious <sup>b</sup> | none                 | 22                                             | 22      | -                 | mean <b>0.6 lower</b> (3.62 lower to 2.42 higher) | ⊕⊕○○<br>LOW | CRITICAL   |

#### Birmingham Pain

|   |                   |                          |             |             |                           |      |    |    |   |                                                   |             |          |
|---|-------------------|--------------------------|-------------|-------------|---------------------------|------|----|----|---|---------------------------------------------------|-------------|----------|
| 1 | randomised trials | not serious <sup>a</sup> | not serious | not serious | very serious <sup>b</sup> | none | 22 | 22 | - | mean <b>1.5 lower</b> (3.75 lower to 0.75 higher) | ⊕⊕○○<br>LOW | CRITICAL |
|---|-------------------|--------------------------|-------------|-------------|---------------------------|------|----|----|---|---------------------------------------------------|-------------|----------|

CI: Confidence interval

#### Explanations

- a. Unclear risk of detection bias
- b. Few events reported do not meet the optimal information size and suggest fragility in the estimate.

IBS-Birmingham Total (lower = better; measured at 6 weeks)

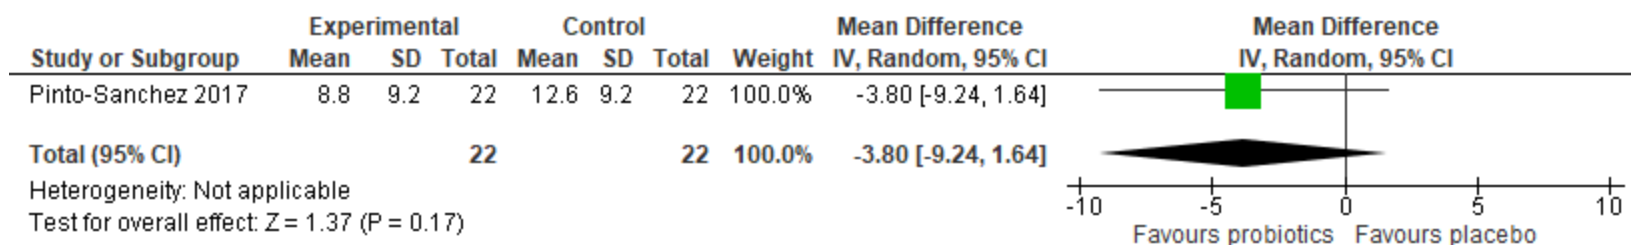

Birmingham Constipation (lower = better; measured at 6 weeks)

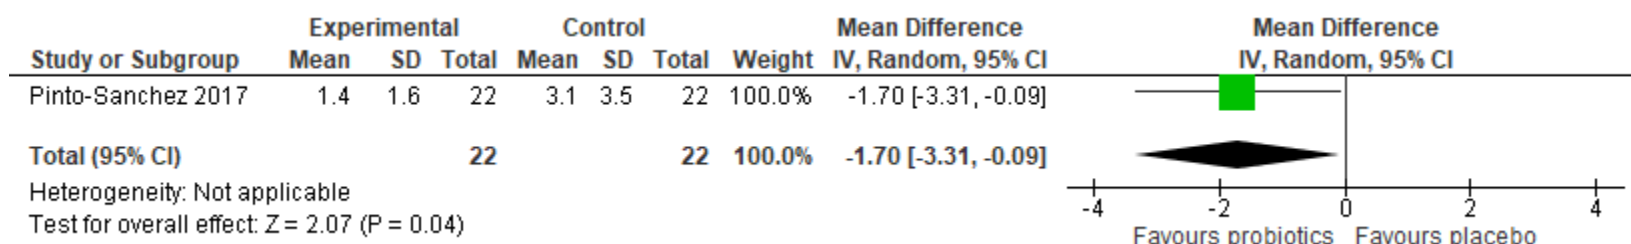

Birmingham Diarrhea (lower = better; measured at 6 weeks)

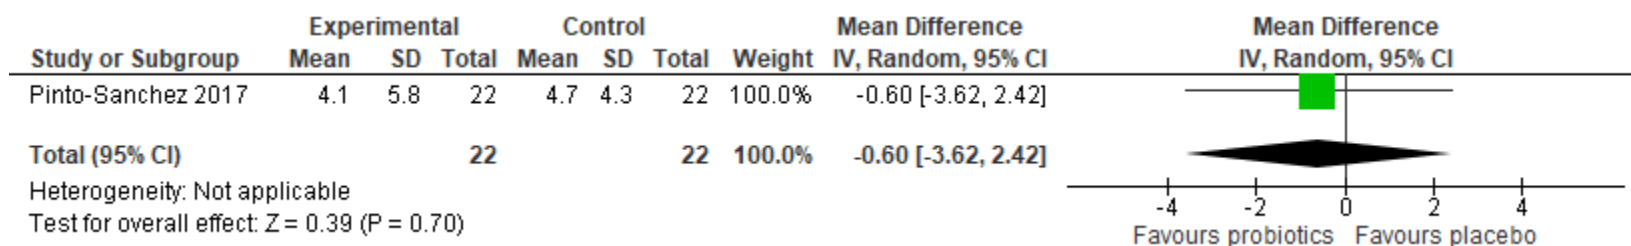

Birmingham Pain (lower = better; measured at 6 weeks)

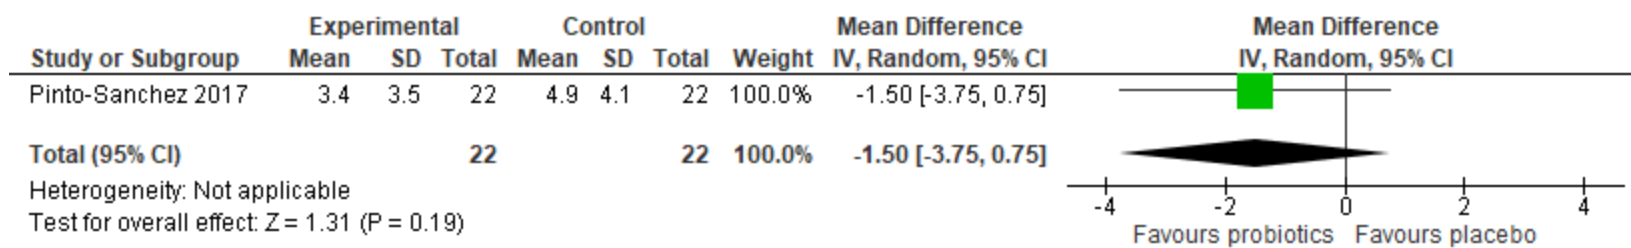

**Question:** *Lactobacillus rhamnosus* NCIMB 30174 + *Lactobacillus plantarum* NCIMB 30173 + *Lactobacillus acidophilus* NCIMB 30175 + *Enterococcus faecium* NCIMB 30176 compared to placebo for adults with IBS (6v)

**Bibliography:** Sisson 2014

| Certainty assessment |              |              |               |              |             |                      | No of patients                                                                                                                        |         | Effect            |                   | Certainty | Importance |
|----------------------|--------------|--------------|---------------|--------------|-------------|----------------------|---------------------------------------------------------------------------------------------------------------------------------------|---------|-------------------|-------------------|-----------|------------|
| No of studies        | Study design | Risk of bias | Inconsistency | Indirectness | Imprecision | Other considerations | <i>L. rhamnosus</i> NCIMB 30174 + <i>L. plantarum</i> NCIMB 30173 + <i>L. acidophilus</i> NCIMB 30175 + <i>E. faecium</i> NCIMB 30176 | Placebo | Relative (95% CI) | Absolute (95% CI) |           |            |

**IBS-SSS Total**

|   |                   |                           |             |             |                      |      |     |    |   |                                                     |                  |          |
|---|-------------------|---------------------------|-------------|-------------|----------------------|------|-----|----|---|-----------------------------------------------------|------------------|----------|
| 1 | randomised trials | very serious <sup>a</sup> | not serious | not serious | serious <sup>b</sup> | none | 124 | 62 | - | mean <b>31.8 lower</b> (63.68 lower to 0.08 higher) | ⊕○○○<br>VERY LOW | CRITICAL |
|---|-------------------|---------------------------|-------------|-------------|----------------------|------|-----|----|---|-----------------------------------------------------|------------------|----------|

**IBS-SSS Pain**

| Certainty assessment |                   |                           |               |              |                      |                      | № of patients                                                                                                                         |         | Effect            |                                                    | Certainty        | Importance |
|----------------------|-------------------|---------------------------|---------------|--------------|----------------------|----------------------|---------------------------------------------------------------------------------------------------------------------------------------|---------|-------------------|----------------------------------------------------|------------------|------------|
| № of studies         | Study design      | Risk of bias              | Inconsistency | Indirectness | Imprecision          | Other considerations | <i>L. rhamnosus</i> NCIMB 30174 + <i>L. plantarum</i> NCIMB 30173 + <i>L. acidophilus</i> NCIMB 30175 + <i>E. faecium</i> NCIMB 30176 | Placebo | Relative (95% CI) | Absolute (95% CI)                                  |                  |            |
| 1                    | randomised trials | very serious <sup>a</sup> | not serious   | not serious  | serious <sup>b</sup> | none                 | 124                                                                                                                                   | 62      | -                 | mean <b>18.9 lower</b> (35.57 lower to 2.23 lower) | ⊕○○○<br>VERY LOW | CRITICAL   |

#### IBS-SSS Bloating

|   |                   |                           |             |             |             |      |     |    |   |                                                    |             |          |
|---|-------------------|---------------------------|-------------|-------------|-------------|------|-----|----|---|----------------------------------------------------|-------------|----------|
| 1 | randomised trials | very serious <sup>a</sup> | not serious | not serious | not serious | none | 124 | 62 | - | mean <b>3.8 lower</b> (12.51 lower to 4.91 higher) | ⊕⊕○○<br>LOW | CRITICAL |
|---|-------------------|---------------------------|-------------|-------------|-------------|------|-----|----|---|----------------------------------------------------|-------------|----------|

#### IBS QoL



| Certainty assessment |                   |                           |               |              |             |                      | № of patients                                                                                                                         |         | Effect            |                                                   | Certainty   | Importance |
|----------------------|-------------------|---------------------------|---------------|--------------|-------------|----------------------|---------------------------------------------------------------------------------------------------------------------------------------|---------|-------------------|---------------------------------------------------|-------------|------------|
| № of studies         | Study design      | Risk of bias              | Inconsistency | Indirectness | Imprecision | Other considerations | <i>L. rhamnosus</i> NCIMB 30174 + <i>L. plantarum</i> NCIMB 30173 + <i>L. acidophilus</i> NCIMB 30175 + <i>E. faecium</i> NCIMB 30176 | Placebo | Relative (95% CI) | Absolute (95% CI)                                 |             |            |
| 1                    | randomised trials | very serious <sup>a</sup> | not serious   | not serious  | not serious | none                 | 124                                                                                                                                   | 62      | -                 | mean <b>2.2 higher</b><br>(4 lower to 8.4 higher) | ⊕⊕○○<br>LOW | CRITICAL   |

CI: Confidence interval

### Explanations

- a. High risk of attrition bias
- b. The 95% CI includes the potential for both benefit and harm.

IBS-SSS Total (lower = better; measured at 12 weeks)

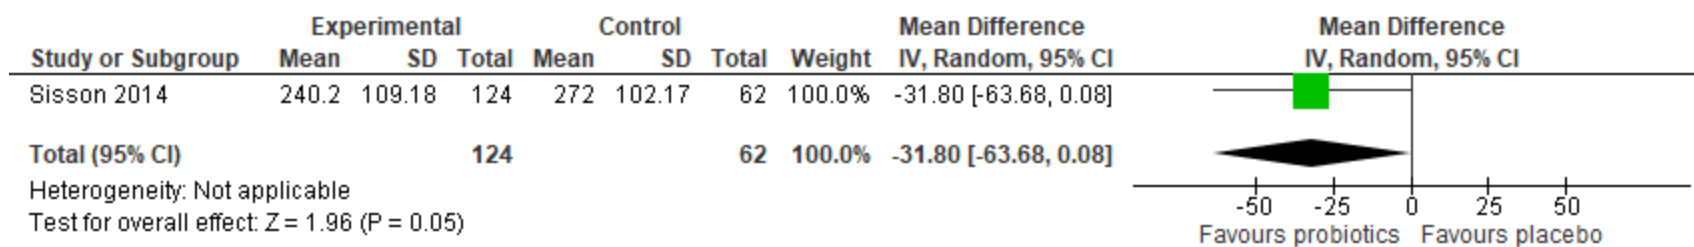

IBS-SSS Pain (lower = better; measured at 12 weeks)

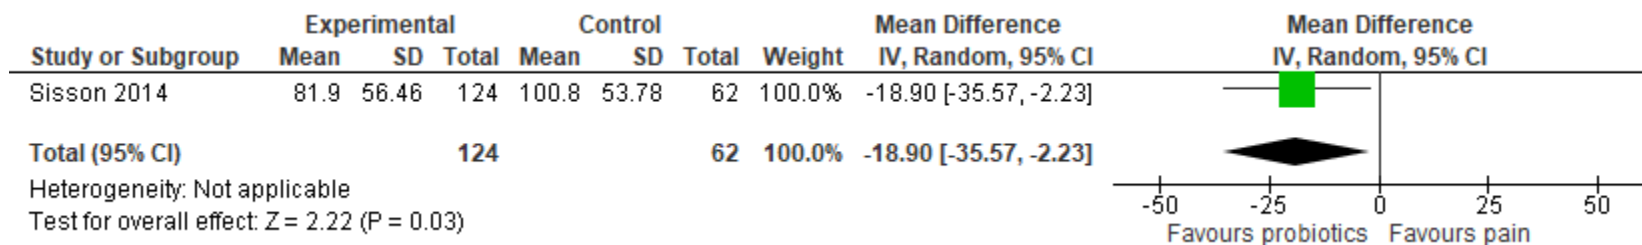

IBS-SSS Bloating (lower = better; measured at 12 weeks)

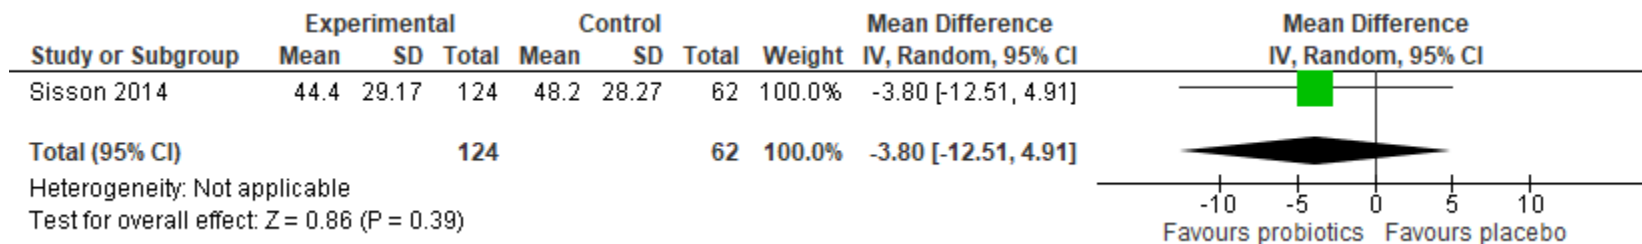

IBS QoL (higher = better; measured at 12 weeks)

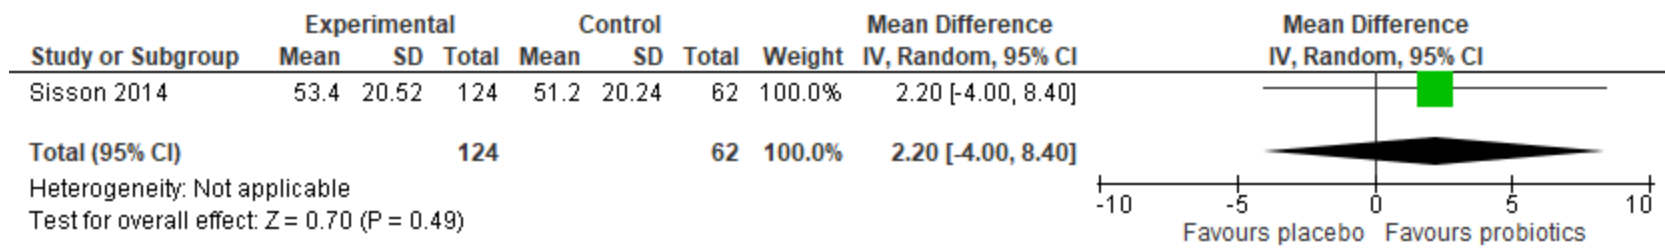

**Question:** *Lactobacillus acidophilus* NCIMB 30157 and NCIMB 30156 + *Bifidobacterium bifidum* NCIMB 30153 + *Bifidobacterium animalis* subsp. *lactis* NCIMB 30172 compared to placebo for adults with IBS (6w)

**Bibliography:** Williams 2009

| Certainty assessment |              |              |               |              |             |                      | No of patients                                                                                                                          |         | Effect            |                   | Certainty | Importance |
|----------------------|--------------|--------------|---------------|--------------|-------------|----------------------|-----------------------------------------------------------------------------------------------------------------------------------------|---------|-------------------|-------------------|-----------|------------|
| No of studies        | Study design | Risk of bias | Inconsistency | Indirectness | Imprecision | Other considerations | <i>L. acidophilus</i> NCIMB 30157 and NCIMB 30156 + <i>B. bifidum</i> NCIMB 30153 + <i>B. animalis</i> subsp. <i>lactis</i> NCIMB 30172 | Placebo | Relative (95% CI) | Absolute (95% CI) |           |            |

**IBS SSS at 8 weeks**

|   |                   |                           |             |             |                      |      |    |    |   |                                               |                       |          |
|---|-------------------|---------------------------|-------------|-------------|----------------------|------|----|----|---|-----------------------------------------------|-----------------------|----------|
| 1 | randomised trials | very serious <sup>a</sup> | not serious | not serious | serious <sup>b</sup> | none | 28 | 24 | - | mean 21.77 lower (76.64 lower to 33.1 higher) | ⊕○○○<br>○<br>VERY LOW | CRITICAL |
|---|-------------------|---------------------------|-------------|-------------|----------------------|------|----|----|---|-----------------------------------------------|-----------------------|----------|

**CI:** Confidence interval

**Explanations**

a. High risk of selection and attrition bias

b. Few events reported do not meet the optimal information size and suggest fragility in the estimate. The 95% CI includes the potential for both benefit and harm.

IBS SSS at 8 weeks (lower = better; measured at 8 weeks)

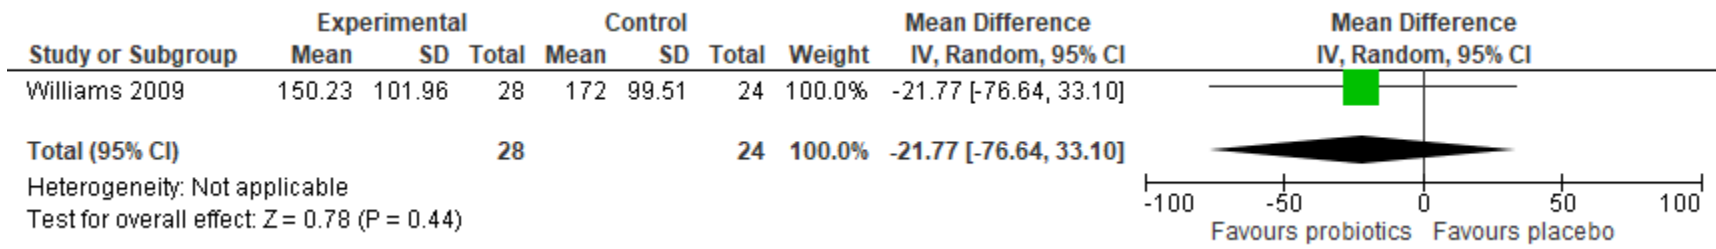

**Question:** *Lactobacillus acidophilus* KCTC 11906BP + *Lactobacillus plantarum* KCTC 11867BP + *Lactobacillus rhamnosus* KCTC 11868BP + *Bifidobacterium breve* KCTC 11858BP + *Bifidobacterium animalis* subsp. *lactis* KCTC 11903BP + *Bifidobacterium longum* subsp. *longum* KCTC 11860BP + *Streptococcus salivarius* subsp. *thermophilus* KCTC 11870BP compared to placebo for adults with IBS (6x)

**Bibliography:** Ki Cha 2012

| Certainty assessment |              |              |               |              |             |                                                                                                                                                                                                                                                                                                                                                                       | No of patients |                   | Effect            |  | Certainty | Importance |
|----------------------|--------------|--------------|---------------|--------------|-------------|-----------------------------------------------------------------------------------------------------------------------------------------------------------------------------------------------------------------------------------------------------------------------------------------------------------------------------------------------------------------------|----------------|-------------------|-------------------|--|-----------|------------|
| No of studies        | Study design | Risk of bias | Inconsistency | Indirectness | Imprecision | Other considerations                                                                                                                                                                                                                                                                                                                                                  | Placebo        | Relative (95% CI) | Absolute (95% CI) |  |           |            |
|                      |              |              |               |              |             | <i>L. acidophilus</i><br>KCTC 11906BP<br>+ <i>L. plantarum</i><br>KCTC 11867BP<br>+ <i>L. rhamnosus</i><br>KCTC 11868BP<br>+ <i>B. breve</i><br>KCTC 11858BP<br>+ <i>B. animalis</i><br>subsp. <i>lactis</i><br>KCTC 11903BP<br>+ <i>B. longum</i><br>subsp. <i>longum</i><br>KCTC 11860BP<br>+ <i>S. salivarius</i><br>subsp.<br><i>thermophilus</i><br>KCTC 11870BP |                |                   |                   |  |           |            |

Adequate Relief of IBS Symptoms

| Certainty assessment |                   |                      |               |              |                      |                      | No of patients | Effect            |                                   | Certainty                                                 | Importance  |          |
|----------------------|-------------------|----------------------|---------------|--------------|----------------------|----------------------|----------------|-------------------|-----------------------------------|-----------------------------------------------------------|-------------|----------|
| No of studies        | Study design      | Risk of bias         | Inconsistency | Indirectness | Imprecision          | Other considerations | Placebo        | Relative (95% CI) | Absolute (95% CI)                 |                                                           |             |          |
| 1                    | randomised trials | serious <sup>a</sup> | not serious   | not serious  | serious <sup>b</sup> | none                 | 12/25 (48.0%)  | 3/25 (12.0%)      | <b>RR 4.00</b><br>(1.28 to 12.47) | <b>360 more per 1,000</b><br>(from 34 more to 1,000 more) | ⊕⊕○○<br>LOW | CRITICAL |

CI: Confidence interval; RR: Risk ratio

### Explanations

- a. Unclear risk of detection and reporting bias
- b. Few events reported do not meet the optimal information size and suggest fragility in the estimate.

Adequate Relief of IBS Symptoms

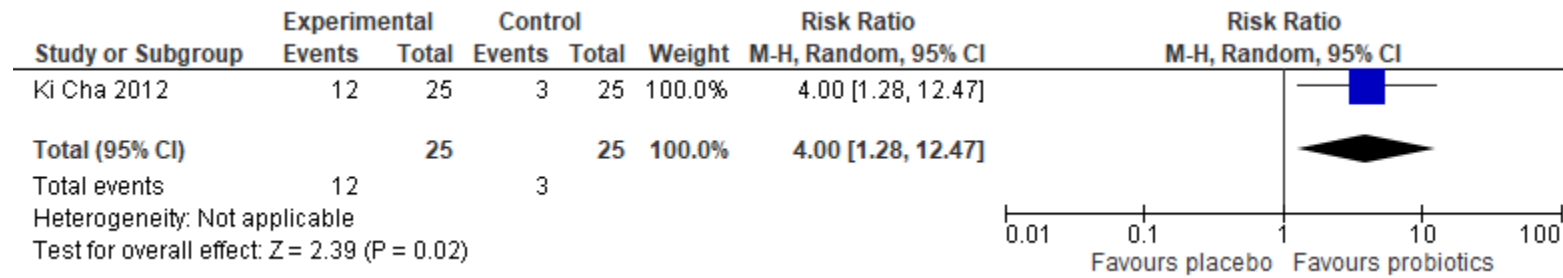



**Question:** *Bifidobacterium bifidum* MIMBb75 compared to placebo for adults with IBS (6y)

**Bibliography:** Guglielmetti 2011

| Certainty assessment |              |              |               |              |             |                      | No of patients            |         | Effect            |                   | Certainty | Importance |
|----------------------|--------------|--------------|---------------|--------------|-------------|----------------------|---------------------------|---------|-------------------|-------------------|-----------|------------|
| No of studies        | Study design | Risk of bias | Inconsistency | Indirectness | Imprecision | Other considerations | <i>B. bifidum</i> MIMBb75 | Placebo | Relative (95% CI) | Absolute (95% CI) |           |            |

**Response Rate as per SGA**

|   |                   |                      |             |             |                      |      |                  |                  |                                  |                                                          |             |          |
|---|-------------------|----------------------|-------------|-------------|----------------------|------|------------------|------------------|----------------------------------|----------------------------------------------------------|-------------|----------|
| 1 | randomised trials | serious <sup>a</sup> | not serious | not serious | serious <sup>b</sup> | none | 35/60<br>(58.3%) | 13/62<br>(21.0%) | <b>RR 2.78</b><br>(1.64 to 4.72) | <b>373 more per 1,000</b><br>(from 134 more to 780 more) | ⊕⊕○○<br>LOW | CRITICAL |
|---|-------------------|----------------------|-------------|-------------|----------------------|------|------------------|------------------|----------------------------------|----------------------------------------------------------|-------------|----------|

**CI:** Confidence interval; **RR:** Risk ratio

**Explanations**

- a. Unclear risk of detection and reporting bias
- b. Few events reported do not meet the optimal information size and suggest fragility in the estimate.

Overall Response Rate as per SGA

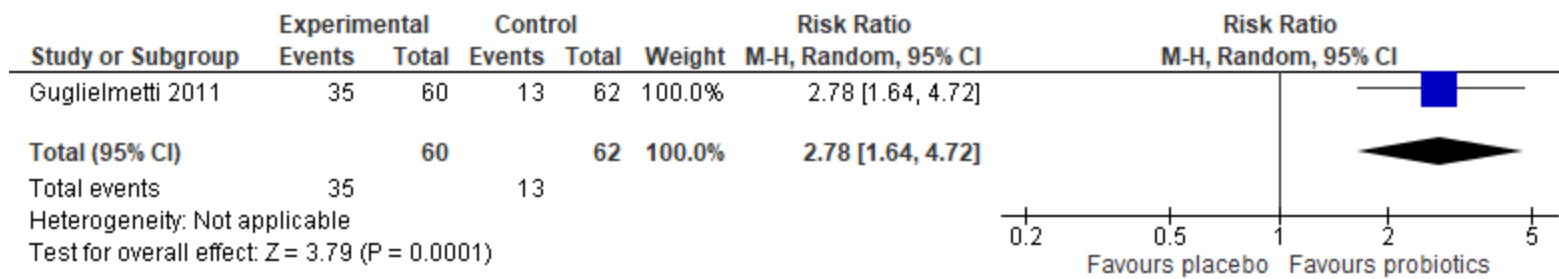

**Question:** *Bifidobacterium animalis* subsp. *animalis* DN-173 + *Streptococcus salivarius* subsp. *thermophilus* + *Lactobacillus delbrueckii* subsp. *bulgaricus* compared to placebo for adults with IBS (6z)

**Bibliography:** Guyonnet 2007

| Certainty assessment |              |              |               |              |             |                      | № of patients                                                                                                                                       |         | Effect            |                   | Certainty | Importance |
|----------------------|--------------|--------------|---------------|--------------|-------------|----------------------|-----------------------------------------------------------------------------------------------------------------------------------------------------|---------|-------------------|-------------------|-----------|------------|
| № of studies         | Study design | Risk of bias | Inconsistency | Indirectness | Imprecision | Other considerations | <i>B. animalis</i> subsp. <i>animalis</i> DN-173 + <i>S. salivarius</i> subsp. <i>thermophilus</i> + <i>L. delbrueckii</i> subsp. <i>bulgaricus</i> | Placebo | Relative (95% CI) | Absolute (95% CI) |           |            |

**Quality of Life Responder Rate**

|   |                   |                      |             |             |                      |      |                |                |                               |                                                      |             |          |
|---|-------------------|----------------------|-------------|-------------|----------------------|------|----------------|----------------|-------------------------------|------------------------------------------------------|-------------|----------|
| 1 | randomised trials | serious <sup>a</sup> | not serious | not serious | serious <sup>b</sup> | none | 88/135 (65.2%) | 63/132 (47.7%) | <b>RR 1.37</b> (1.10 to 1.70) | <b>177 more per 1,000</b> (from 48 more to 334 more) | ⊕⊕○○<br>LOW | CRITICAL |
|---|-------------------|----------------------|-------------|-------------|----------------------|------|----------------|----------------|-------------------------------|------------------------------------------------------|-------------|----------|

**CI:** Confidence interval; **RR:** Risk ratio

**Explanations**

- a. Unclear risk of selection performance, and detection bias
- b. Few events reported do not meet the optimal information size and suggest fragility in the estimate.

Quality of Life Responder Rate

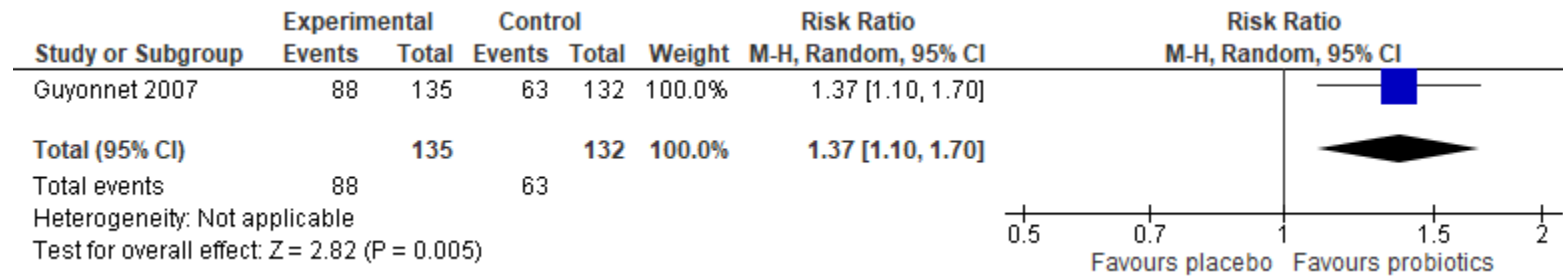

**Question:** *Lactobacillus paracasei* subsp. *paracasei* F-19 + *Lactobacillus acidophilus* LA-5 + *Bifidobacterium animalis* subsp. *lactis* Bb12 + *Lactobacillus delbrueckii* subsp. *bulgaricus* + *Streptococcus salivarius* subsp. *thermophilus* compared to placebo for adults with IBS (6aa)

**Bibliography:** Simren 2010

| Certainty assessment |              |              |               |              |             |                      | № of patients                                                                                                                                                                                                                   |         | Effect            |                   | Certainty | Importance |
|----------------------|--------------|--------------|---------------|--------------|-------------|----------------------|---------------------------------------------------------------------------------------------------------------------------------------------------------------------------------------------------------------------------------|---------|-------------------|-------------------|-----------|------------|
| № of studies         | Study design | Risk of bias | Inconsistency | Indirectness | Imprecision | Other considerations |                                                                                                                                                                                                                                 | Placebo | Relative (95% CI) | Absolute (95% CI) |           |            |
|                      |              |              |               |              |             |                      | <i>L. paracasei</i> subsp. <i>paracasei</i> F-19 + <i>L. acidophilus</i> LA-5 + <i>B. animalis</i> subsp. <i>lactis</i> Bb12 + <i>L. delbrueckii</i> subsp. <i>bulgaricus</i> + <i>S. salivarius</i> subsp. <i>thermophilus</i> |         |                   |                   |           |            |

**Adequate Relief of Symptoms**

|   |                   |                      |             |             |                      |      |               |               |                                  |                                                          |             |          |
|---|-------------------|----------------------|-------------|-------------|----------------------|------|---------------|---------------|----------------------------------|----------------------------------------------------------|-------------|----------|
| 1 | randomised trials | serious <sup>a</sup> | not serious | not serious | serious <sup>b</sup> | none | 14/37 (37.8%) | 10/37 (27.0%) | <b>RR 1.40</b><br>(0.72 to 2.74) | <b>108 more per 1,000</b><br>(from 76 fewer to 470 more) | ⊕⊕○○<br>LOW | CRITICAL |
|---|-------------------|----------------------|-------------|-------------|----------------------|------|---------------|---------------|----------------------------------|----------------------------------------------------------|-------------|----------|

**CI:** Confidence interval; **RR:** Risk ratio

## Explanations

- a. Unclear risk of reporting and detection bias
- b. Few events reported do not meet the optimal information size and suggest fragility in the estimate.

## Adequate Relief of Symptoms

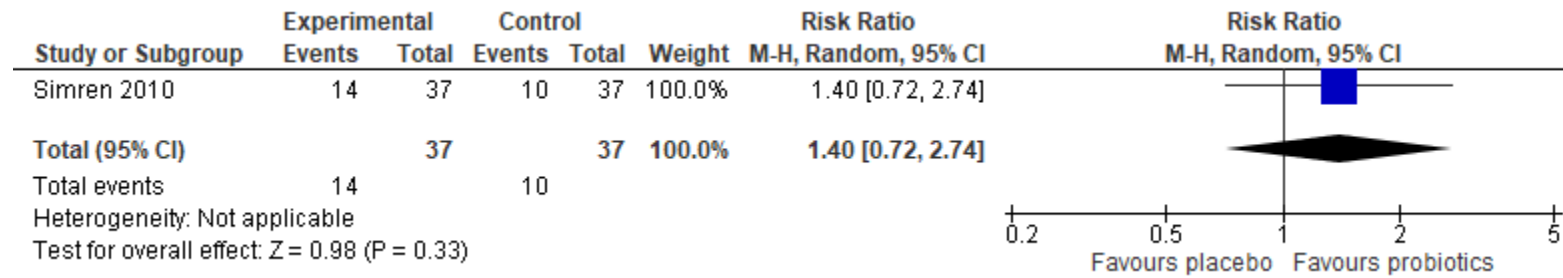

**Question:** *Lactobacillus plantarum* CECT7484 and CECT7485 + *Pediococcus acidilactici* CECT7483 compared to placebo for adults with IBS (6ab)

**Bibliography:** Lorenzo-Zuniga 2014

| Certainty assessment |              |              |               |              |             |                      | No of patients                                                              |         | Effect            |                   | Certainty | Importance |
|----------------------|--------------|--------------|---------------|--------------|-------------|----------------------|-----------------------------------------------------------------------------|---------|-------------------|-------------------|-----------|------------|
| No of studies        | Study design | Risk of bias | Inconsistency | Indirectness | Imprecision | Other considerations | <i>L. plantarum</i> CECT7484 and CECT7485 + <i>P. acidilactici</i> CECT7483 | Placebo | Relative (95% CI) | Absolute (95% CI) |           |            |

**Proportion with Good Response**

|   |                   |                      |             |             |                      |      |               |              |                                   |                                                            |             |          |
|---|-------------------|----------------------|-------------|-------------|----------------------|------|---------------|--------------|-----------------------------------|------------------------------------------------------------|-------------|----------|
| 1 | randomised trials | serious <sup>a</sup> | not serious | not serious | serious <sup>b</sup> | none | 26/47 (55.3%) | 4/24 (16.7%) | <b>RR 6.19</b><br>(1.83 to 20.92) | <b>865 more per 1,000</b><br>(from 138 more to 1,000 more) | ⊕⊕○○<br>LOW | CRITICAL |
|---|-------------------|----------------------|-------------|-------------|----------------------|------|---------------|--------------|-----------------------------------|------------------------------------------------------------|-------------|----------|

**CI:** Confidence interval; **RR:** Risk ratio

**Explanations**

- a. Unclear risk of detection and reporting bias
- b. Few events reported do not meet the optimal information size and suggest fragility in the estimate.

Proportion with Good Response (i.e. change in IBS-QoL  $\geq 15$ )

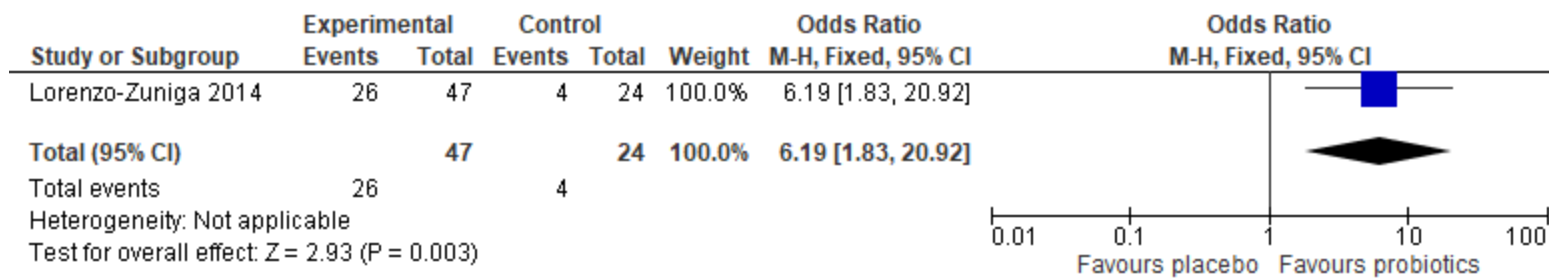



**Question:** *Bifidobacterium longum* subsp. *infantis* M-63 + *Bifidobacterium breve* M-16V + *B. longum* Reuter ATCC BAA-999 compared to placebo for children with IBS (6ac)

**Bibliography:** Giannetti 2017

| Certainty assessment |              |              |               |              |             |                      | No of patients                                                                                              |         | Effect            |                   | Certainty | Importance |
|----------------------|--------------|--------------|---------------|--------------|-------------|----------------------|-------------------------------------------------------------------------------------------------------------|---------|-------------------|-------------------|-----------|------------|
| No of studies        | Study design | Risk of bias | Inconsistency | Indirectness | Imprecision | Other considerations | <i>B. longum</i> subsp. <i>infantis</i> M-63 + <i>B. breve</i> M-16V + <i>B. longum</i> Reuter ATCC BAA-999 | Placebo | Relative (95% CI) | Absolute (95% CI) |           |            |

**Proportion with Resolution of Abdominal Pain**

|   |                   |             |             |             |                           |      |               |              |                               |                                                       |             |          |
|---|-------------------|-------------|-------------|-------------|---------------------------|------|---------------|--------------|-------------------------------|-------------------------------------------------------|-------------|----------|
| 1 | randomised trials | not serious | not serious | not serious | very serious <sup>a</sup> | none | 20/48 (41.7%) | 5/25 (20.0%) | <b>RR 2.08</b> (0.89 to 4.89) | <b>216 more per 1,000</b> (from 22 fewer to 778 more) | ⊕⊕○○<br>LOW | CRITICAL |
|---|-------------------|-------------|-------------|-------------|---------------------------|------|---------------|--------------|-------------------------------|-------------------------------------------------------|-------------|----------|

**CI:** Confidence interval; **RR:** Risk ratio

**Explanations**

a. The 95% CI includes the potential for both appreciable benefit as well as appreciable harm. Few events reported do not meet the optimal information size and suggest fragility in the estimate.

Proportion with Resolution of Abdominal Pain

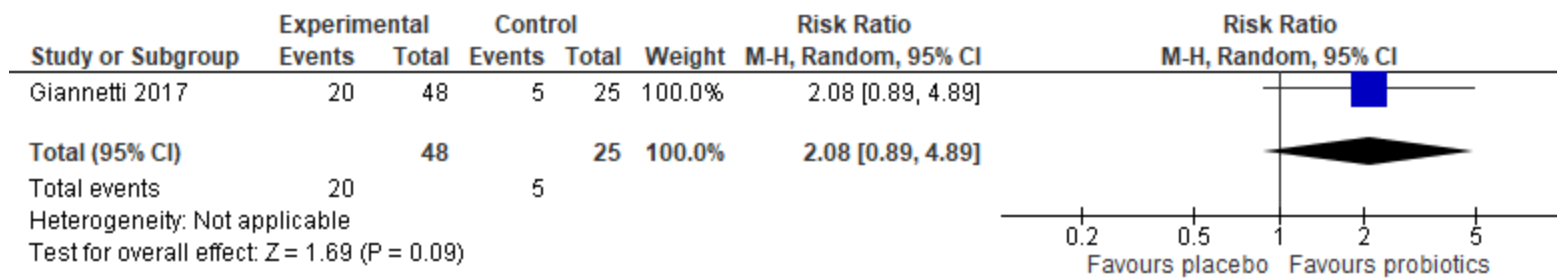

**Question:** *Lactobacillus brevis* KB290 compared to placebo for adults and children with IBS (6ad)

**Bibliography:** Murakami 2012

| Certainty assessment                              |                   |                      |               |              |                      |                      | No of patients         |         | Effect            |                                                      | Certainty   | Importance |
|---------------------------------------------------|-------------------|----------------------|---------------|--------------|----------------------|----------------------|------------------------|---------|-------------------|------------------------------------------------------|-------------|------------|
| No of studies                                     | Study design      | Risk of bias         | Inconsistency | Indirectness | Imprecision          | Other considerations | <i>L. brevis</i> KB290 | Placebo | Relative (95% CI) | Absolute (95% CI)                                    |             |            |
| <b>Overall Health QOL (lower score is better)</b> |                   |                      |               |              |                      |                      |                        |         |                   |                                                      |             |            |
| 1                                                 | randomised trials | serious <sup>a</sup> | not serious   | not serious  | serious <sup>b</sup> | none                 | 23                     | 23      | -                 | mean <b>0.1 lower</b><br>(0.56 lower to 0.36 higher) | ⊕⊕○○<br>LOW | CRITICAL   |

**CI:** Confidence interval

**Explanations**

- a. Unclear risk of bias in all domains
- b. Few events reported do not meet the optimal information size and suggest fragility in the estimate.

Overall Health QOL (lower = better)

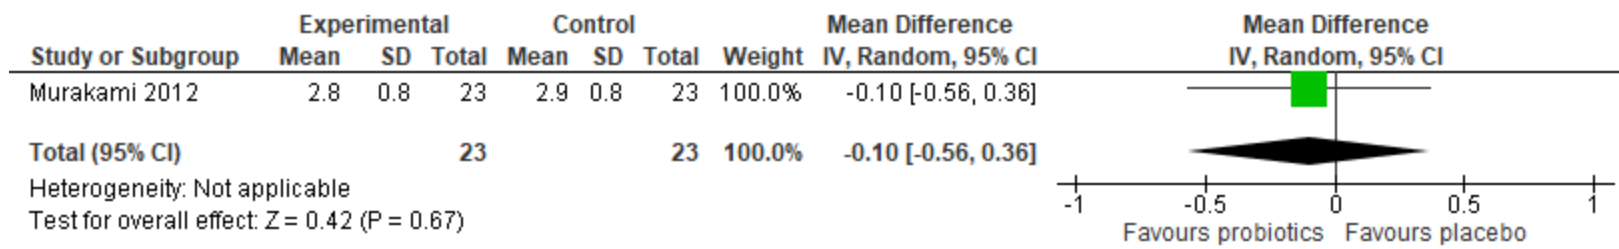

**Question:** *Lactobacillus casei* DG compared to placebo for adults with IBS (6ae)

**Bibliography:** Cremon 2018

| Certainty assessment |              |              |               |              |             |                      | No of patients     |         | Effect            |                   | Certainty | Importance |
|----------------------|--------------|--------------|---------------|--------------|-------------|----------------------|--------------------|---------|-------------------|-------------------|-----------|------------|
| No of studies        | Study design | Risk of bias | Inconsistency | Indirectness | Imprecision | Other considerations | <i>L. casei</i> DG | Placebo | Relative (95% CI) | Absolute (95% CI) |           |            |

**Proportion of Responders for Abdominal Pain**

|   |                   |                      |             |             |                      |      |               |               |                                  |                                                         |             |          |
|---|-------------------|----------------------|-------------|-------------|----------------------|------|---------------|---------------|----------------------------------|---------------------------------------------------------|-------------|----------|
| 1 | randomised trials | serious <sup>a</sup> | not serious | not serious | serious <sup>b</sup> | none | 15/40 (37.5%) | 12/40 (30.0%) | <b>RR 1.25</b><br>(0.67 to 2.32) | <b>75 more per 1,000</b><br>(from 99 fewer to 396 more) | ⊕⊕○○<br>LOW | CRITICAL |
|---|-------------------|----------------------|-------------|-------------|----------------------|------|---------------|---------------|----------------------------------|---------------------------------------------------------|-------------|----------|

**CI:** Confidence interval; **RR:** Risk ratio

**Explanations**

- a. Unclear risk of detection bias
- b. Few events reported do not meet the optimal information size and suggest fragility in the estimate.

**Proportion of Response of Abdominal Pain**

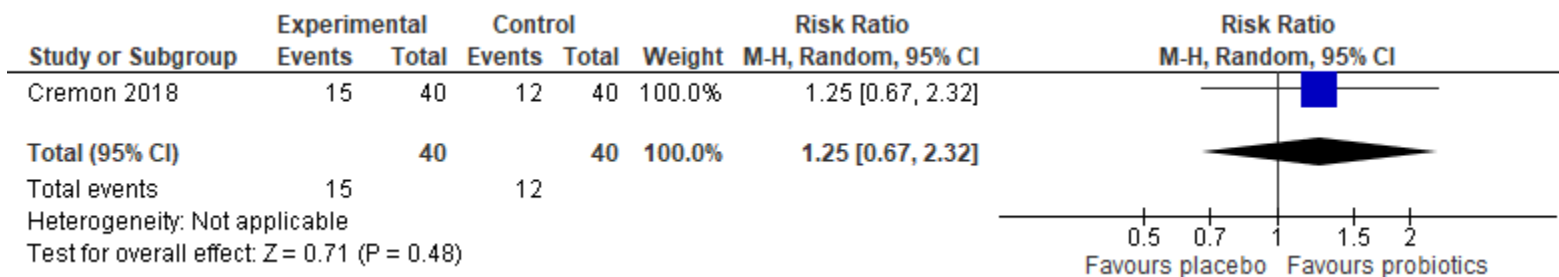

**Question:** *Lactobacillus acidophilus* NCFM + *Bifidobacterium animalis* subsp. *lactis* ATCC SD5220 compared to placebo for adults with IBS (6af)

**Bibliography:** Ringel 2011

| Certainty assessment |              |              |               |              |             |                      | № of patients                                                                    |         | Effect            |                   | Certainty | Importance |
|----------------------|--------------|--------------|---------------|--------------|-------------|----------------------|----------------------------------------------------------------------------------|---------|-------------------|-------------------|-----------|------------|
| № of studies         | Study design | Risk of bias | Inconsistency | Indirectness | Imprecision | Other considerations | <i>L. acidophilus</i> NCFM + <i>B. animalis</i> subsp. <i>lactis</i> ATCC SD5220 | Placebo | Relative (95% CI) | Absolute (95% CI) |           |            |

**Bloating Severity Scores in IBS Subgroup**

|   |                   |             |             |             |                           |      |    |    |   |                                                   |             |          |
|---|-------------------|-------------|-------------|-------------|---------------------------|------|----|----|---|---------------------------------------------------|-------------|----------|
| 1 | randomised trials | not serious | not serious | not serious | very serious <sup>a</sup> | none | 17 | 16 | - | mean <b>2.49 lower</b> (4.54 lower to 0.44 lower) | ⊕⊕○○<br>LOW | CRITICAL |
|---|-------------------|-------------|-------------|-------------|---------------------------|------|----|----|---|---------------------------------------------------|-------------|----------|

**CI:** Confidence interval

**Explanations**

a. Few events reported do not meet the optimal information size and suggest fragility in the estimate.

Bloating Severity Scores in IBS Subgroup (lower = better)

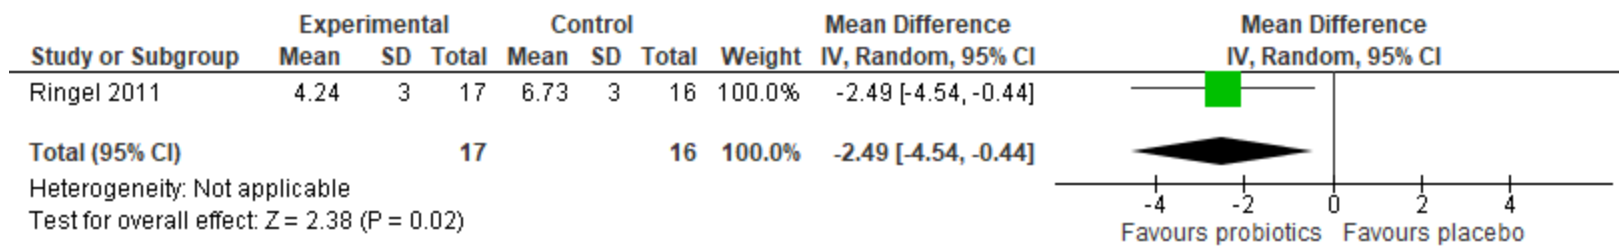

**Question:** *Lactobacillus acidophilus* CL1285 + *Lactobacillus casei* LBC80R + *Lactobacillus rhamnosus* CLR2 compared to placebo for adults with IBS (6ag)

**Bibliography:** Preston 2018

| Certainty assessment |              |              |               |              |             |                      | № of patients                                                                    |         | Effect            |                   | Certainty | Importance |
|----------------------|--------------|--------------|---------------|--------------|-------------|----------------------|----------------------------------------------------------------------------------|---------|-------------------|-------------------|-----------|------------|
| № of studies         | Study design | Risk of bias | Inconsistency | Indirectness | Imprecision | Other considerations | <i>L. acidophilus</i> CL1285 + <i>L. casei</i> LBC80R + <i>L. rhamnosus</i> CLR2 | Placebo | Relative (95% CI) | Absolute (95% CI) |           |            |

**Improvement in QOL Score**

|   |                   |                      |             |             |                      |      |    |    |   |                                                      |             |          |
|---|-------------------|----------------------|-------------|-------------|----------------------|------|----|----|---|------------------------------------------------------|-------------|----------|
| 1 | randomised trials | serious <sup>a</sup> | not serious | not serious | serious <sup>b</sup> | none | 58 | 27 | - | mean <b>5.57 higher</b> (4.89 lower to 16.03 higher) | ⊕⊕○○<br>LOW | CRITICAL |
|---|-------------------|----------------------|-------------|-------------|----------------------|------|----|----|---|------------------------------------------------------|-------------|----------|

**CI:** Confidence interval

**Explanations**

a. unclear risk of selection bias

b. Few events reported do not meet the optimal information size and suggest fragility in the estimate. The 95% CI includes the potential for both benefit and harm.



Improvement in QOL Score

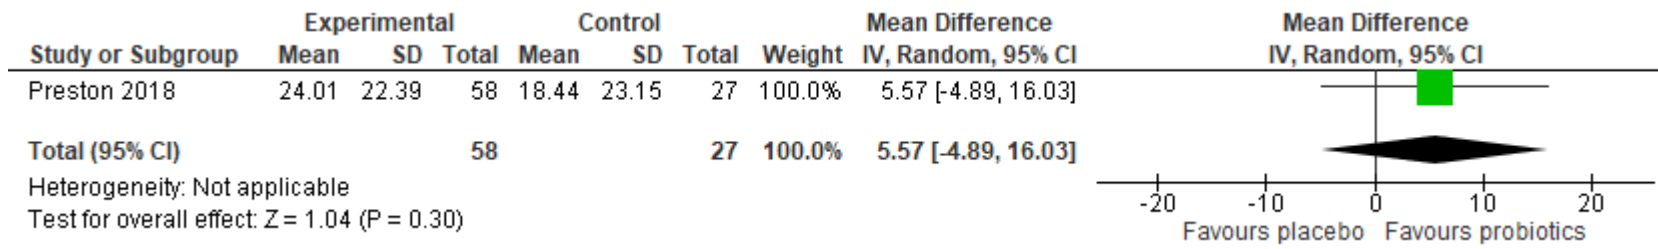

**Question:** *Bacillus subtilis* PXN 21 + *Bifidobacterium bifidum* PXN 23 + *Bifidobacterium breve* PXN 25 + *Bifidobacterium longum* subsp. *infantis* PXN 27 + *B. longum* subsp. *longum* PXN 30 + *Lactobacillus acidophilus* PXN 35 + *Lactobacillus delbrueckii* subsp. *bulgaricus* PXN39 + *Lactobacillus casei* PXN 37 + *Lactobacillus plantarum* PXN 47 + *Lactobacillus rhamnosus* PXN 54 + *Lactobacillus helveticus* PXN 45 + *Lactobacillus salivarius* PXN 57 + *Lactococcus lactis* PXN63 + *Streptococcus salivarius* subsp. *thermophilus* PXN 66 compared to placebo for adults with IBS (6ah)

**Bibliography:** Ishaque 2018

| Certainty assessment |              |              |               |              |             |                                                                                                                                                                                                                                                                                                                                                                                                                                                                                                         | № of patients |                   | Effect            |  | Certainty | Importance |
|----------------------|--------------|--------------|---------------|--------------|-------------|---------------------------------------------------------------------------------------------------------------------------------------------------------------------------------------------------------------------------------------------------------------------------------------------------------------------------------------------------------------------------------------------------------------------------------------------------------------------------------------------------------|---------------|-------------------|-------------------|--|-----------|------------|
| № of studies         | Study design | Risk of bias | Inconsistency | Indirectness | Imprecision | Other considerations                                                                                                                                                                                                                                                                                                                                                                                                                                                                                    | Placebo       | Relative (95% CI) | Absolute (95% CI) |  |           |            |
|                      |              |              |               |              |             | <i>B. subtilis</i> PXN 21<br>+ <i>B. bifidum</i> PXN 23 + <i>B. breve</i> PXN 25 + <i>B. longum</i> subsp. <i>infantis</i> PXN 27 + <i>B. longum</i> subsp. <i>longum</i> PXN 30 + <i>L. acidophilus</i> PXN 35 + <i>L. delbrueckii</i> subsp. <i>bulgaricus</i> PXN39 + <i>L. casei</i> PXN 37 + <i>L. plantarum</i> PXN 47 + <i>L. rhamnosus</i> PXN 54 + <i>L. helveticus</i> PXN 45 + <i>L. salivarius</i> PXN 57 + <i>L. lactis</i> PXN63 + <i>S. salivarius</i> subsp. <i>thermophilus</i> PXN 66 |               |                   |                   |  |           |            |

Overall IBS-SSS Score at 5 months

|   |                   |                           |             |             |                      |      |     |     |   |                                                |                  |          |
|---|-------------------|---------------------------|-------------|-------------|----------------------|------|-----|-----|---|------------------------------------------------|------------------|----------|
| 1 | randomised trials | very serious <sup>a</sup> | not serious | not serious | serious <sup>b</sup> | none | 181 | 179 | - | mean <b>66 lower</b><br>(84 lower to 48 lower) | ⊕○○○<br>VERY LOW | CRITICAL |
|---|-------------------|---------------------------|-------------|-------------|----------------------|------|-----|-----|---|------------------------------------------------|------------------|----------|

CI: Confidence interval

### Explanations

- a. high risk of attrition and reporting bias
- b. The 95% CI includes the potential for both benefit and harm.

Overall IBS-SSS Score at 5 months

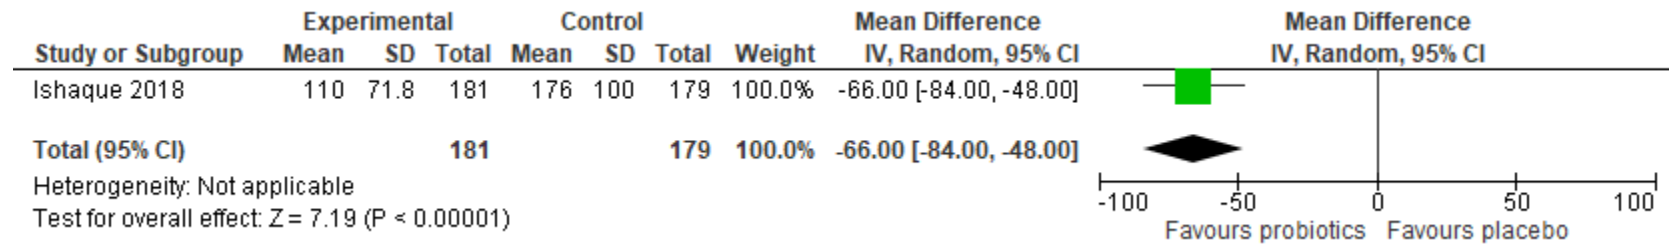

**Question:** *Bifidobacterium bifidum* BGN4 + *Bifidobacterium animalis* subsp. *lactis* AD011 + *Lactobacillus acidophilus* AD031 + *Lactobacillus casei* IBS041 compared to placebo for adults with IBS (6ai)

**Bibliography:** Hong 2009

| Certainty assessment |              |              |               |              |             |                      | № of patients                                                                                                                 |         | Effect            |                   | Certainty | Importance |
|----------------------|--------------|--------------|---------------|--------------|-------------|----------------------|-------------------------------------------------------------------------------------------------------------------------------|---------|-------------------|-------------------|-----------|------------|
| № of studies         | Study design | Risk of bias | Inconsistency | Indirectness | Imprecision | Other considerations | <i>B. bifidum</i> BGN4 + <i>B. animalis</i> subsp. <i>lactis</i> AD011 + <i>L. acidophilus</i> AD031 + <i>L. casei</i> IBS041 | Placebo | Relative (95% CI) | Absolute (95% CI) |           |            |

**Response Rate for Pain**

|   |                   |                      |             |             |                      |      |               |               |                               |                                                       |             |          |
|---|-------------------|----------------------|-------------|-------------|----------------------|------|---------------|---------------|-------------------------------|-------------------------------------------------------|-------------|----------|
| 1 | randomised trials | serious <sup>a</sup> | not serious | not serious | serious <sup>b</sup> | none | 23/36 (63.9%) | 15/34 (44.1%) | <b>RR 1.45</b> (0.92 to 2.27) | <b>199 more per 1,000</b> (from 35 fewer to 560 more) | ⊕⊕○○<br>LOW | CRITICAL |
|---|-------------------|----------------------|-------------|-------------|----------------------|------|---------------|---------------|-------------------------------|-------------------------------------------------------|-------------|----------|

**CI:** Confidence interval; **RR:** Risk ratio

**Explanations**

- a. unclear risk of reporting and detection bias
- b. Few events reported do not meet the optimal information size and suggest fragility in the estimate.

Pain Response Rate

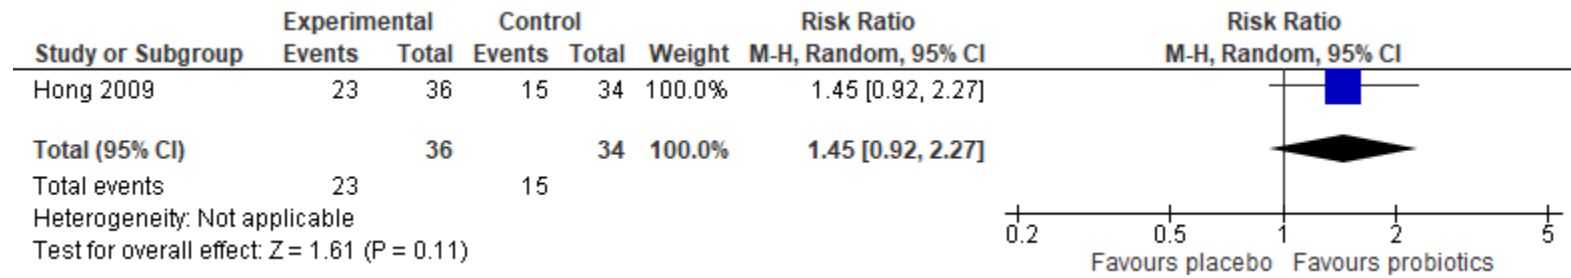

**Question:** *Bifidobacterium longum* subsp. *longum* + *Lactobacillus acidophilus* compared to no probiotics for adults with IBS (6aj)

**Bibliography:** Cui 2012

| Certainty assessment |              |              |               |              |             |                      | No of patients                                                |               | Effect            |                   | Certainty | Importance |
|----------------------|--------------|--------------|---------------|--------------|-------------|----------------------|---------------------------------------------------------------|---------------|-------------------|-------------------|-----------|------------|
| No of studies        | Study design | Risk of bias | Inconsistency | Indirectness | Imprecision | Other considerations | <i>B. longum</i> subsp. <i>longum</i> + <i>L. acidophilus</i> | No probiotics | Relative (95% CI) | Absolute (95% CI) |           |            |

**Frequency of effective response to abdominal pain**

|   |                   |                      |             |             |                           |      |               |              |                               |                                                        |                  |          |
|---|-------------------|----------------------|-------------|-------------|---------------------------|------|---------------|--------------|-------------------------------|--------------------------------------------------------|------------------|----------|
| 1 | randomised trials | serious <sup>a</sup> | not serious | not serious | very serious <sup>b</sup> | none | 23/35 (65.7%) | 6/20 (30.0%) | <b>RR 2.19</b> (1.08 to 4.46) | <b>357 more per 1,000</b> (from 24 more to 1,000 more) | ⊕○○○<br>VERY LOW | CRITICAL |
|---|-------------------|----------------------|-------------|-------------|---------------------------|------|---------------|--------------|-------------------------------|--------------------------------------------------------|------------------|----------|

CI: Confidence interval; RR: Risk ratio

## Explanations

a. Unclear reporting of methods.

b. The 95% CI may not include a clinically meaningful difference. Few events reported do not meet the optimal information size and suggest fragility in the estimate.

Frequency of abdominal pain (measured by response in effectiveness)

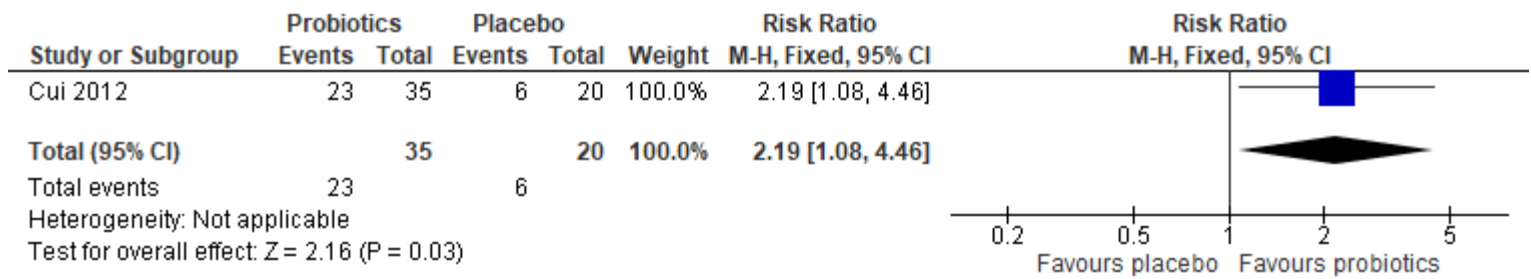



## Question: *Clostridium butyricum* compared to no probiotics for adults with IBS (6ak)

Bibliography: Sun 2018

| Certainty assessment |              |              |               |              |             |                      | № of patients       |               | Effect            |                   | Certainty | Importance |
|----------------------|--------------|--------------|---------------|--------------|-------------|----------------------|---------------------|---------------|-------------------|-------------------|-----------|------------|
| № of studies         | Study design | Risk of bias | Inconsistency | Indirectness | Imprecision | Other considerations | C. <i>butyricum</i> | No probiotics | Relative (95% CI) | Absolute (95% CI) |           |            |

### IBS symptoms (assessed at 4 weeks)

|   |                   |                      |             |             |                           |      |    |    |   |                                                                  |                  |          |
|---|-------------------|----------------------|-------------|-------------|---------------------------|------|----|----|---|------------------------------------------------------------------|------------------|----------|
| 1 | randomised trials | serious <sup>a</sup> | not serious | not serious | very serious <sup>b</sup> | none | 85 | 81 | - | MD 23.20<br><b>lower</b><br>(44.06<br>lower to<br>2.34<br>lower) | ⊕○○○<br>VERY LOW | CRITICAL |
|---|-------------------|----------------------|-------------|-------------|---------------------------|------|----|----|---|------------------------------------------------------------------|------------------|----------|

### Quality of life

|   |                   |                      |             |             |                           |      |    |    |   |                                                                  |                  |          |
|---|-------------------|----------------------|-------------|-------------|---------------------------|------|----|----|---|------------------------------------------------------------------|------------------|----------|
| 1 | randomised trials | serious <sup>a</sup> | not serious | not serious | very serious <sup>b</sup> | none | 85 | 81 | - | MD 2.47<br><b>higher</b><br>(1.81<br>lower to<br>6.75<br>higher) | ⊕○○○<br>VERY LOW | CRITICAL |
|---|-------------------|----------------------|-------------|-------------|---------------------------|------|----|----|---|------------------------------------------------------------------|------------------|----------|

CI: Confidence interval; MD: Mean difference

## Explanations

a. Serious concerns with randomization and allocation concealment.

b. The 95% CI may not include a clinically meaningful difference. Few events reported do not meet the optimal information size and suggest fragility in the estimate.

IBS symptoms (lower = better; week 4)

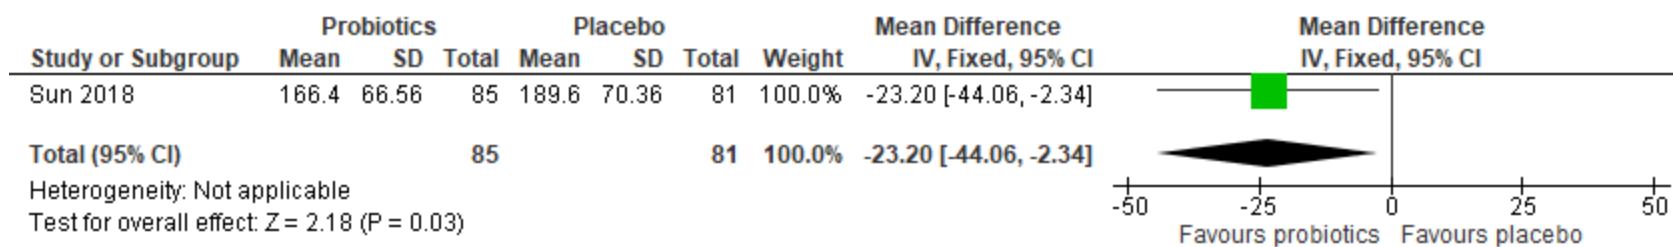

Quality of life (higher = better; week 4)

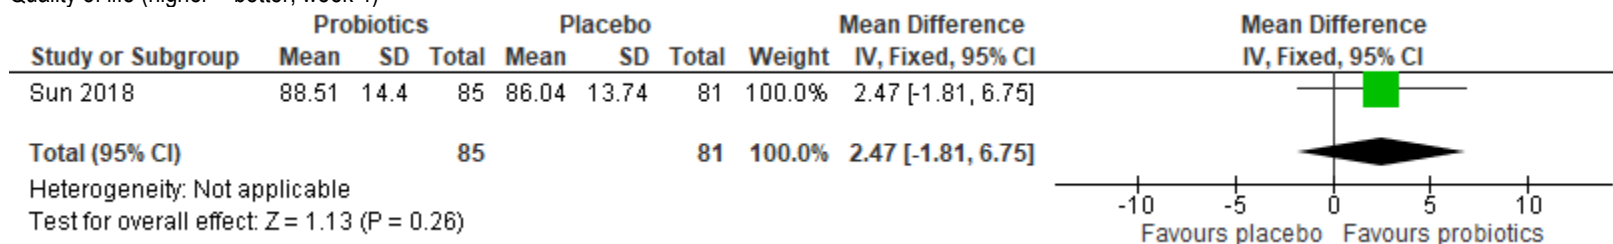

**Question:** *Streptococcus salivarius* subsp. *thermophilus* MG510 + *Lactobacillus plantarum* LRCC5193 compared to no probiotics for adults with IBS (6a)

**Bibliography:** Yoon 2018

| Certainty assessment |              |              |               |              |             |                      | № of patients                                                                        |               | Effect            |                   | Certainty | Importance |
|----------------------|--------------|--------------|---------------|--------------|-------------|----------------------|--------------------------------------------------------------------------------------|---------------|-------------------|-------------------|-----------|------------|
| № of studies         | Study design | Risk of bias | Inconsistency | Indirectness | Imprecision | Other considerations | <i>S. salivarius</i> subsp. <i>thermophilus</i> MG510 + <i>L. plantarum</i> LRCC5193 | No probiotics | Relative (95% CI) | Absolute (95% CI) |           |            |

**Stool consistency assessed with BSS**

|   |                   |                      |             |             |                           |      |    |    |   |                                            |                  |          |
|---|-------------------|----------------------|-------------|-------------|---------------------------|------|----|----|---|--------------------------------------------|------------------|----------|
| 1 | randomised trials | serious <sup>a</sup> | not serious | not serious | very serious <sup>b</sup> | none | 88 | 83 | - | MD 0.6 higher (0.27 higher to 0.93 higher) | ⊕○○○<br>VERY LOW | CRITICAL |
|---|-------------------|----------------------|-------------|-------------|---------------------------|------|----|----|---|--------------------------------------------|------------------|----------|

**Quality of life (measured at 4 weeks)**

|   |                   |                      |             |             |                           |      |    |    |   |                                          |                  |          |
|---|-------------------|----------------------|-------------|-------------|---------------------------|------|----|----|---|------------------------------------------|------------------|----------|
| 1 | randomised trials | serious <sup>a</sup> | not serious | not serious | very serious <sup>b</sup> | none | 88 | 83 | - | MD 2.1 lower (4.65 lower to 0.45 higher) | ⊕○○○<br>VERY LOW | CRITICAL |
|---|-------------------|----------------------|-------------|-------------|---------------------------|------|----|----|---|------------------------------------------|------------------|----------|

CI: Confidence interval; MD: Mean difference

## Explanations

a. Serious concerns with loss to follow-up.

b. The 95% CI may not include a clinically meaningful difference. Few events reported do not meet the optimal information size and suggest fragility in the estimate.

Stool consistency assessed with BSS

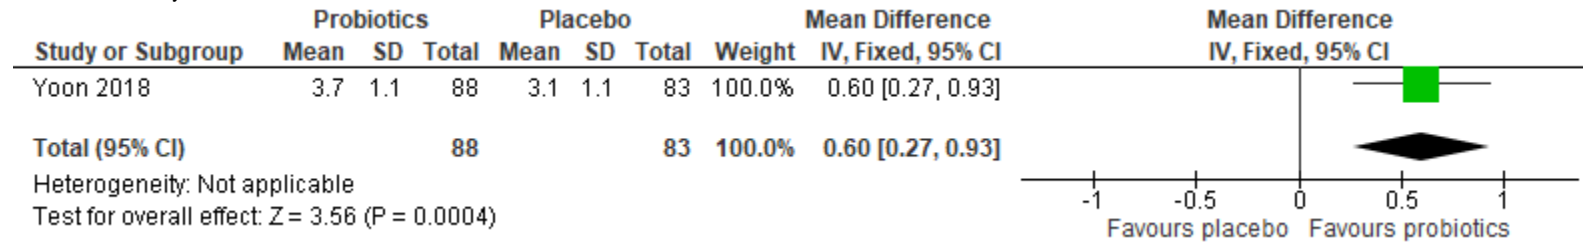

Quality of life (lower = better)

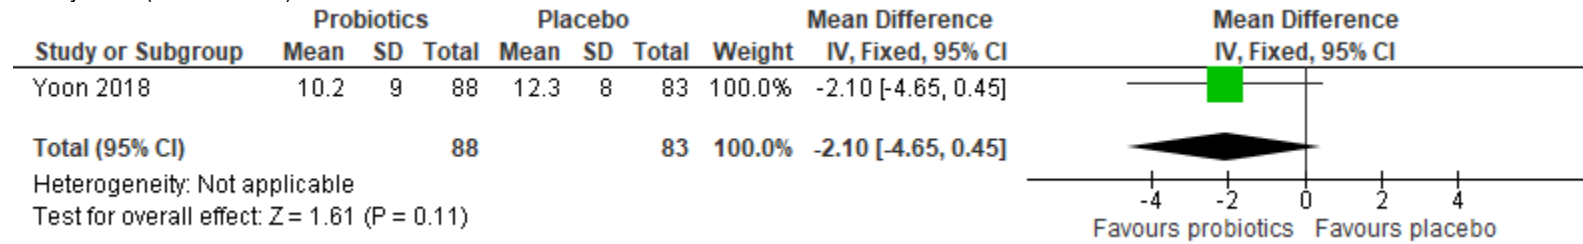

## Question: *Bacillus coagulans* Unique IS2 compared to no probiotics for children with IBS (6am)

Bibliography: Sudha 2018

| Certainty assessment |              |              |               |              |             |                      | № of patients                  |               | Effect            |                   | Certainty | Importance |
|----------------------|--------------|--------------|---------------|--------------|-------------|----------------------|--------------------------------|---------------|-------------------|-------------------|-----------|------------|
| № of studies         | Study design | Risk of bias | Inconsistency | Indirectness | Imprecision | Other considerations | <i>B. coagulans</i> Unique IS2 | No probiotics | Relative (95% CI) | Absolute (95% CI) |           |            |

Abdominal pain intensity (assessed with: higher score indicates greater reduction in pain)

|   |                   |             |             |             |                           |      |    |    |   |                                             |             |          |
|---|-------------------|-------------|-------------|-------------|---------------------------|------|----|----|---|---------------------------------------------|-------------|----------|
| 1 | randomised trials | not serious | not serious | not serious | very serious <sup>a</sup> | none | 72 | 69 | - | MD 3.39 higher (2.99 higher to 3.79 higher) | ⊕⊕○○<br>LOW | CRITICAL |
|---|-------------------|-------------|-------------|-------------|---------------------------|------|----|----|---|---------------------------------------------|-------------|----------|

Abdominal discomfort

|   |                   |             |             |             |                           |      |    |    |   |                                         |             |          |
|---|-------------------|-------------|-------------|-------------|---------------------------|------|----|----|---|-----------------------------------------|-------------|----------|
| 1 | randomised trials | not serious | not serious | not serious | very serious <sup>a</sup> | none | 72 | 69 | - | MD 1.9 lower (2.24 lower to 1.56 lower) | ⊕⊕○○<br>LOW | CRITICAL |
|---|-------------------|-------------|-------------|-------------|---------------------------|------|----|----|---|-----------------------------------------|-------------|----------|

CI: Confidence interval; MD: Mean difference

## Explanations

a. The 95% CI may not include a clinically meaningful difference. Few events reported do not meet the optimal information size and suggest fragility in the estimate.

Reduction in pain intensity (8 weeks)

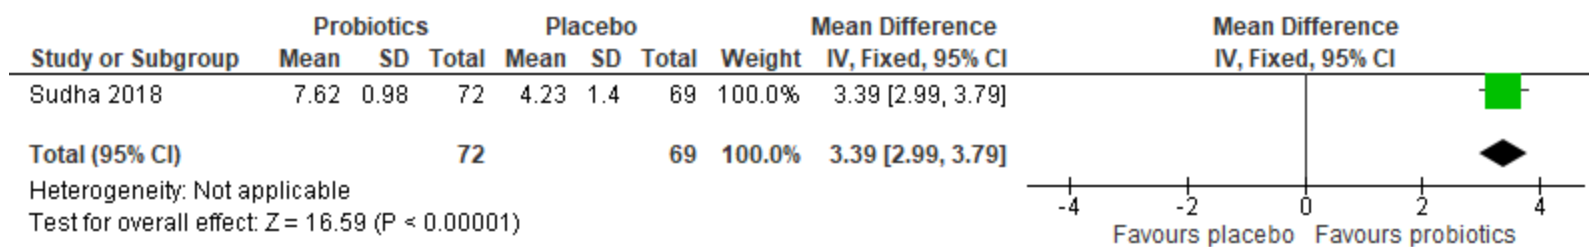

Abdominal discomfort (lower = better; 8 weeks)

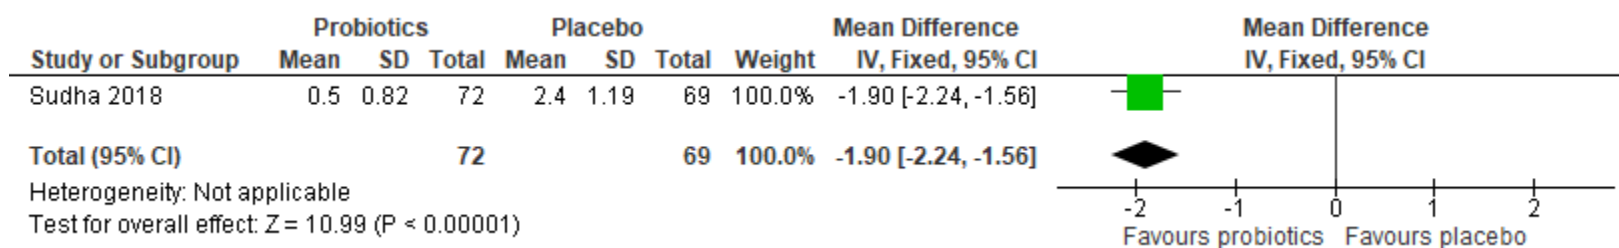

**Question:** *Lactobacillus acidophilus* + *Lactobacillus rhamnosus* + *Bifidobacterium breve* + *Bifidobacterium animalis* subsp. *lactis* + *Bifidobacterium longum* subsp. *longum* + *Streptococcus salivarius* subsp. *thermophilus* compared to no probiotics for adults with IBS (6a)

**Bibliography:** Yoon 2015

| Certainty assessment |              |              |               |              |             |                      | No of patients                                                                                                                                                                                    |               | Effect            |                   | Certainty | Importance |
|----------------------|--------------|--------------|---------------|--------------|-------------|----------------------|---------------------------------------------------------------------------------------------------------------------------------------------------------------------------------------------------|---------------|-------------------|-------------------|-----------|------------|
| No of studies        | Study design | Risk of bias | Inconsistency | Indirectness | Imprecision | Other considerations | <i>L. acidophilus</i> + <i>L. rhamnosus</i> + <i>B. breve</i> + <i>B. animalis</i> subsp. <i>lactis</i> + <i>B. longum</i> subsp. <i>longum</i> + <i>S. salivarius</i> subsp. <i>thermophilus</i> | No probiotics | Relative (95% CI) | Absolute (95% CI) |           |            |

**Adequate symptom relief**

|   |                   |                      |             |             |                           |      |               |               |                                  |                                                          |                  |          |
|---|-------------------|----------------------|-------------|-------------|---------------------------|------|---------------|---------------|----------------------------------|----------------------------------------------------------|------------------|----------|
| 1 | randomised trials | serious <sup>a</sup> | not serious | not serious | very serious <sup>b</sup> | none | 29/39 (74.4%) | 26/42 (61.9%) | <b>RR 1.20</b><br>(0.89 to 1.62) | <b>124 more per 1,000</b><br>(from 68 fewer to 384 more) | ⊕○○○<br>VERY LOW | CRITICAL |
|---|-------------------|----------------------|-------------|-------------|---------------------------|------|---------------|---------------|----------------------------------|----------------------------------------------------------|------------------|----------|

CI: Confidence interval; RR: Risk ratio

## Explanations

a. Serious concerns from loss to follow-up and selective reporting.

b. The 95% CI may not include a clinically meaningful difference. Few events reported do not meet the optimal information size and suggest fragility in the estimate.

Adequate symptom relief

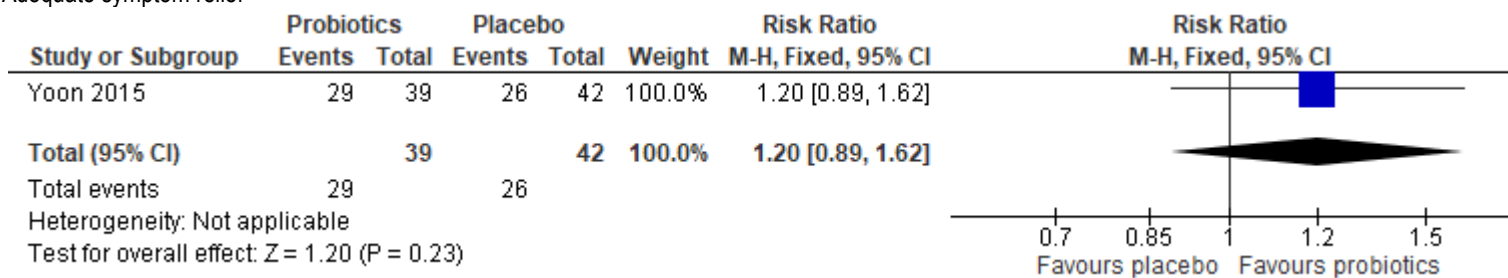



**Question:** *Bifidobacterium animalis* subsp. *lactis* Bb12 + *Lactobacillus acidophilus* LA-5 + *Lactobacillus delbrueckii* subsp. *bulgaricus* LBY-27 + *Streptococcus salivarius* subsp. *thermophilus* STY-31 compared to no probiotics for adults with IBS (6ao)

**Bibliography:** Jafari 2014

| Certainty assessment |              |              |               |              |             |                      | No of patients                                                                                                                                                                             |               | Effect            |                   | Certainty | Importance |
|----------------------|--------------|--------------|---------------|--------------|-------------|----------------------|--------------------------------------------------------------------------------------------------------------------------------------------------------------------------------------------|---------------|-------------------|-------------------|-----------|------------|
| No of studies        | Study design | Risk of bias | Inconsistency | Indirectness | Imprecision | Other considerations | <i>B. animalis</i> subsp. <i>lactis</i> Bb12 + <i>L. acidophilus</i> LA-5 + <i>L. delbrueckii</i> subsp. <i>bulgaricus</i> LBY-27 + <i>S. salivarius</i> subsp. <i>thermophilus</i> STY-31 | No probiotics | Relative (95% CI) | Absolute (95% CI) |           |            |

**Mild-to-moderate degree of GI symptoms**

|   |                   |             |             |             |                           |      |              |              |                                  |                                                           |             |          |
|---|-------------------|-------------|-------------|-------------|---------------------------|------|--------------|--------------|----------------------------------|-----------------------------------------------------------|-------------|----------|
| 1 | randomised trials | not serious | not serious | not serious | very serious <sup>a</sup> | none | 6/54 (11.1%) | 8/54 (14.8%) | <b>RR 0.75</b><br>(0.28 to 2.02) | <b>37 fewer per 1,000</b><br>(from 107 fewer to 151 more) | ⊕⊕○○<br>LOW | CRITICAL |
|---|-------------------|-------------|-------------|-------------|---------------------------|------|--------------|--------------|----------------------------------|-----------------------------------------------------------|-------------|----------|

**Relief of general symptoms**

|   |                   |             |             |             |                           |      |               |               |                                  |                                                          |             |          |
|---|-------------------|-------------|-------------|-------------|---------------------------|------|---------------|---------------|----------------------------------|----------------------------------------------------------|-------------|----------|
| 1 | randomised trials | not serious | not serious | not serious | very serious <sup>b</sup> | none | 46/54 (85.2%) | 25/54 (46.3%) | <b>RR 1.84</b><br>(1.35 to 2.50) | <b>389 more per 1,000</b><br>(from 162 more to 694 more) | ⊕⊕○○<br>LOW | CRITICAL |
|---|-------------------|-------------|-------------|-------------|---------------------------|------|---------------|---------------|----------------------------------|----------------------------------------------------------|-------------|----------|

CI: Confidence interval; RR: Risk ratio

## Explanations

- The 95% CI includes the potential for benefits and harms.
- Few events reported do not meet the optimal information size and suggest fragility in the estimate.

Increase in mild-to-moderate degree of GI symptoms

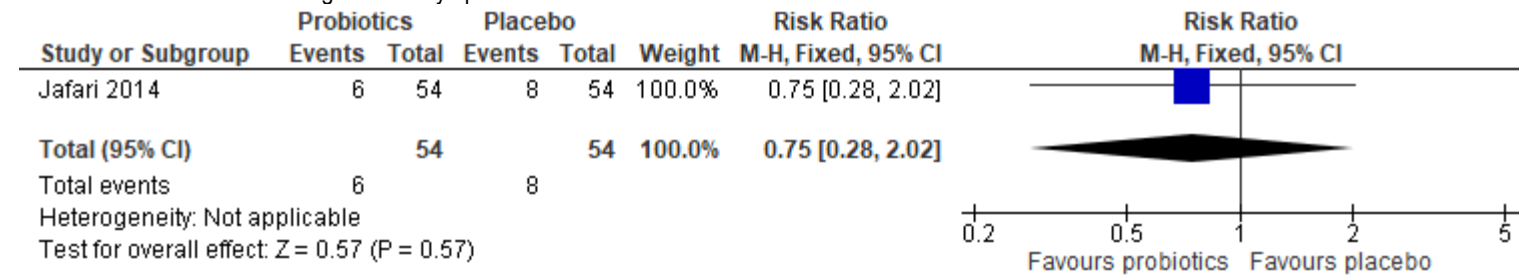

Relief of general symptoms

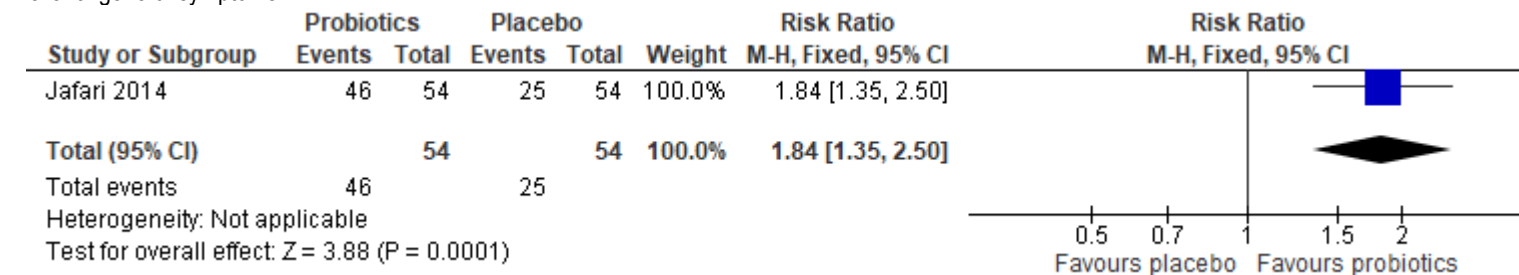

**Question:** *Bifidobacterium longum* subsp. *longum* + *Bifidobacterium bifidum* + *Bifidobacterium animalis* subsp. *lactis* + *Lactobacillus acidophilus* + *Lactobacillus rhamnosus* + *Streptococcus salivarius* subsp. *thermophilus* compared to no probiotics for adults with IBS (6ap)

**Bibliography:** Yoon 2014

| Certainty assessment |              |              |               |              |             |                      | No of patients                                                                                                                                                                                      |               | Effect            |                   | Certainty | Importance |
|----------------------|--------------|--------------|---------------|--------------|-------------|----------------------|-----------------------------------------------------------------------------------------------------------------------------------------------------------------------------------------------------|---------------|-------------------|-------------------|-----------|------------|
| No of studies        | Study design | Risk of bias | Inconsistency | Indirectness | Imprecision | Other considerations | <i>B. longum</i> subsp. <i>longum</i> + <i>B. bifidum</i> + <i>B. animalis</i> subsp. <i>lactis</i> + <i>L. acidophilus</i> + <i>L. rhamnosus</i> + <i>S. salivarius</i> subsp. <i>thermophilus</i> | No probiotics | Relative (95% CI) | Absolute (95% CI) |           |            |

**Global relief of IBS symptoms**

|   |                   |                      |             |             |                           |      |               |              |                                  |                                                        |                  |          |
|---|-------------------|----------------------|-------------|-------------|---------------------------|------|---------------|--------------|----------------------------------|--------------------------------------------------------|------------------|----------|
| 1 | randomised trials | serious <sup>a</sup> | not serious | not serious | very serious <sup>b</sup> | none | 17/25 (68.0%) | 9/24 (37.5%) | <b>RR 1.81</b><br>(1.01 to 3.25) | <b>304 more per 1,000</b><br>(from 4 more to 844 more) | ⊕○○○<br>VERY LOW | CRITICAL |
|---|-------------------|----------------------|-------------|-------------|---------------------------|------|---------------|--------------|----------------------------------|--------------------------------------------------------|------------------|----------|

CI: Confidence interval; RR: Risk ratio

## Explanations

a. Serious concerns due to unclear methods for blinding and reporting.

b. The 95% CI may not include clinically meaningful benefits. Small sample suggests fragility in the estimate.

Global relief of IBS symptoms

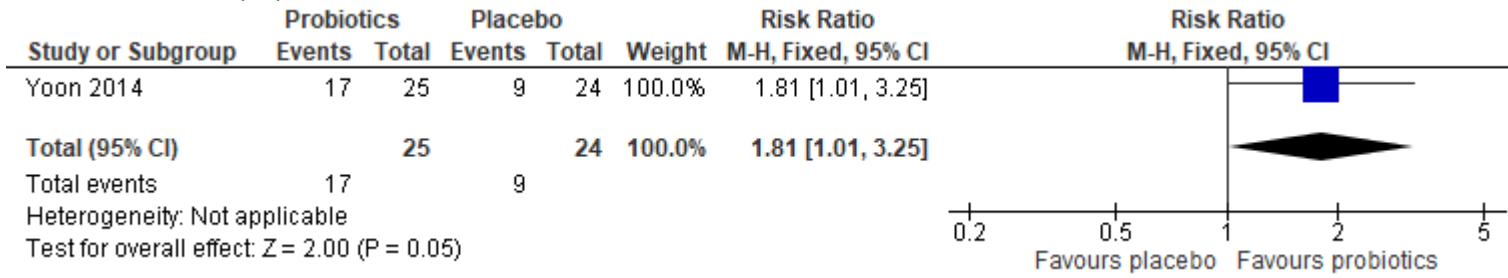

**Question:** *Bifidobacterium animalis* subsp. *lactis* W52 + *Lactobacillus casei* W56 + *Lactobacillus salivarius* W57 + *Lactococcus lactis* W58 + *Lactobacillus acidophilus* ATCC 700396 + *Lactobacillus rhamnosus* W71 compared to placebo for adults with IBS (6aq)

**Bibliography:** Ludidi 2014

| Certainty assessment |              |              |               |              |             |                      | № of patients                                                                                                                                                                     |         | Effect            |                   | Certainty | Importance |
|----------------------|--------------|--------------|---------------|--------------|-------------|----------------------|-----------------------------------------------------------------------------------------------------------------------------------------------------------------------------------|---------|-------------------|-------------------|-----------|------------|
| № of studies         | Study design | Risk of bias | Inconsistency | Indirectness | Imprecision | Other considerations | <i>B. animalis</i> subsp. <i>lactis</i> W52 + <i>L. casei</i> W56 + <i>L. salivarius</i> W57 + <i>L. lactis</i> W58 + <i>L. acidophilus</i> ATCC 700396 + <i>L. rhamnosus</i> W71 | Placebo | Relative (95% CI) | Absolute (95% CI) |           |            |

Number of hypersensitive patients(6 weeks)

|   |                   |             |             |             |                           |      |               |               |                                  |                                                          |             |  |
|---|-------------------|-------------|-------------|-------------|---------------------------|------|---------------|---------------|----------------------------------|----------------------------------------------------------|-------------|--|
| 1 | randomised trials | not serious | not serious | not serious | very serious <sup>a</sup> | none | 16/21 (76.2%) | 14/19 (73.7%) | <b>RR 1.03</b><br>(0.72 to 1.48) | <b>22 more per 1,000</b><br>(from 206 fewer to 354 more) | ⊕⊕○○<br>LOW |  |
|---|-------------------|-------------|-------------|-------------|---------------------------|------|---------------|---------------|----------------------------------|----------------------------------------------------------|-------------|--|

CI: Confidence interval; RR: Risk ratio

## Explanations

a. The 95% CI includes the potential for both appreciable benefit as well as appreciable harm. Few events reported do not meet the optimal information size and suggest fragility in the estimate.

Number of hypersensitive patients (6 weeks)

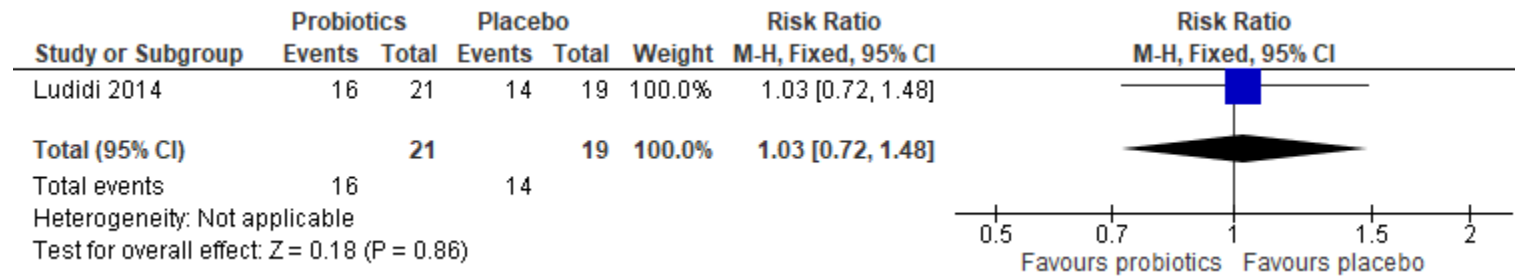

**Question:** *Lactobacillus rhamnosus* ATCC 53103 and LC705 + *Bifidobacterium breve* Bb99 + *Propionibacterium freudenreichii* subsp. *shermanii* JS compared to placebo for adults with IBS (6ar)

**Bibliography:** Kajander 2005

| Certainty assessment |              |              |               |              |             |                      | № of patients                                                                                                                           |         | Effect            |                   | Certainty | Importance |
|----------------------|--------------|--------------|---------------|--------------|-------------|----------------------|-----------------------------------------------------------------------------------------------------------------------------------------|---------|-------------------|-------------------|-----------|------------|
| № of studies         | Study design | Risk of bias | Inconsistency | Indirectness | Imprecision | Other considerations | <i>L. rhamnosus</i> ATCC 53103 + <i>L. rhamnosus</i> LC705 + <i>B. breve</i> Bb99 + <i>P. freudenreichii</i> subsp. <i>shermanii</i> JS | Placebo | Relative (95% CI) | Absolute (95% CI) |           |            |

**Symptom score (abdominal pain, distension, flatulence, borborygmi) (assessed with: difference from baseline)**

|   |                   |             |             |             |                           |      |    |    |   |                                                  |             |          |
|---|-------------------|-------------|-------------|-------------|---------------------------|------|----|----|---|--------------------------------------------------|-------------|----------|
| 1 | randomised trials | not serious | not serious | not serious | very serious <sup>a</sup> | none | 52 | 51 | - | SMD 7.7<br>SD lower<br>(13.9 lower to 1.6 lower) | ⊕⊕○○<br>LOW | CRITICAL |
|---|-------------------|-------------|-------------|-------------|---------------------------|------|----|----|---|--------------------------------------------------|-------------|----------|

**CI:** Confidence interval; **SMD:** Standardized mean difference

## Explanations

a. The 95% CI includes values that may not be clinically meaningful. Few events reported do not meet the optimal information size and suggest fragility in the estimate.

## Question: *Lactobacillus rhamnosus* ATCC 53103 compared to no probiotics for children with IBS (6as)

Bibliography: Gawronska 2007

| Certainty assessment |              |              |               |              |             |                      | № of patients                  |               | Effect            |                   | Certainty | Importance |
|----------------------|--------------|--------------|---------------|--------------|-------------|----------------------|--------------------------------|---------------|-------------------|-------------------|-----------|------------|
| № of studies         | Study design | Risk of bias | Inconsistency | Indirectness | Imprecision | Other considerations | <i>L. rhamnosus</i> ATCC 53103 | No probiotics | Relative (95% CI) | Absolute (95% CI) |           |            |

### Treatment success

|   |                   |             |             |             |                           |      |              |             |                                   |                                                           |             |          |
|---|-------------------|-------------|-------------|-------------|---------------------------|------|--------------|-------------|-----------------------------------|-----------------------------------------------------------|-------------|----------|
| 1 | randomised trials | not serious | not serious | not serious | very serious <sup>a</sup> | none | 6/18 (33.3%) | 1/19 (5.3%) | <b>RR 6.33</b><br>(0.84 to 47.57) | <b>281 more per 1,000</b><br>(from 8 fewer to 1,000 more) | ⊕⊕○○<br>LOW | CRITICAL |
|---|-------------------|-------------|-------------|-------------|---------------------------|------|--------------|-------------|-----------------------------------|-----------------------------------------------------------|-------------|----------|

### Improvement in symptoms

|   |                   |             |             |             |                           |      |               |              |                                  |                                                          |             |          |
|---|-------------------|-------------|-------------|-------------|---------------------------|------|---------------|--------------|----------------------------------|----------------------------------------------------------|-------------|----------|
| 1 | randomised trials | not serious | not serious | not serious | very serious <sup>a</sup> | none | 10/18 (55.6%) | 6/19 (31.6%) | <b>RR 1.76</b><br>(0.81 to 3.84) | <b>240 more per 1,000</b><br>(from 60 fewer to 897 more) | ⊕⊕○○<br>LOW | CRITICAL |
|---|-------------------|-------------|-------------|-------------|---------------------------|------|---------------|--------------|----------------------------------|----------------------------------------------------------|-------------|----------|

CI: Confidence interval; RR: Risk ratio

## Explanations

a. The 95% CI includes the potential for both appreciable benefit as well as appreciable harm. Few events reported do not meet the optimal information size and suggest fragility in the estimate.

Treatment success



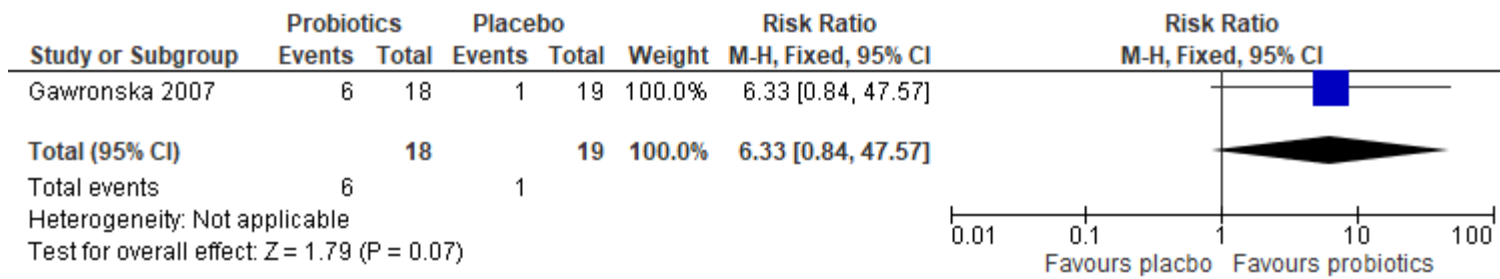

Improvement in symptoms

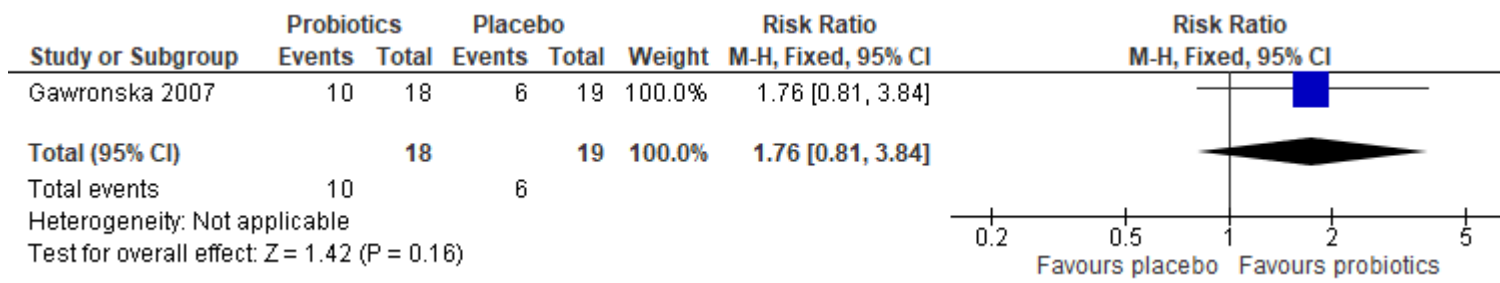

## Appendix 7: Should probiotics be used to reduce the duration or severity of diarrhea in children with acute infectious gastroenteritis?

### Bibliography

Included in: Allen SJ, Martinez EG, Gregorio GV, Dans LF. Probiotics for treating acute infectious diarrhoea. Cochrane Database of Systematic Reviews 2010: CD003048

Basu S, Chatterjee M, Ganguly S, et al. Efficacy of Lactobacillus rhamnosus GG in acute watery diarrhoea of Indian children: a randomised controlled trial. *Journal of Paediatrics and Child Health* 2007;43(12):837–42.

Basu S, Paul DK, Ganguly S, et al. Efficacy of high-dose Lactobacillus rhamnosus GG in controlling acute watery diarrhea in Indian children: a randomized controlled trial. *Journal of Clinical Gastroenterology* 2009;43(3):208–13.

Bhatnagar S, Singh KD, Sazawal S, et al. Efficacy of milk versus yogurt offered as part of a mixed diet in acute noncholera diarrhea among malnourished children. *Journal of Pediatrics* 1998;132(6):999–1004.

Boudraa G, Benbouabdellah M, Hachelaf W, et al. Effect of feeding yogurt versus milk in children with acute diarrhea and carbohydrate malabsorption. *Journal of Pediatric Gastroenterology and Nutrition* 2001;33(3):307–13.

Boulloche J, Mouterde O, Mallet E. Management of acute diarrhoea in infants and young children. Controlled study of the anti-diarrheal efficacy of killed *L. acidophilus* (LB strain) versus a placebo and a reference drug (loperamide). *Annales de Pediatrie* 1994;41(7):457–63.

Canani RB, Cirillo P, Terrin G, et al. Cesarano L, Spagnuolo MI, Vincenzo A, et al. Probiotics for treatment of acute diarrhea in children: randomised clinical trial of five different preparations. *BMJ* 2007;335(7615):340.

Chen CC, Kong MS, Lai MW, et al. Probiotics have clinical, microbiologic, and immunologic efficacy in acute infectious diarrhea. *The Pediatric Infectious Diseases Journal* 2010;29(2):135–8.

Costa-Ribeiro H, Ribeiro TC, Mattos AP, et al. Limitations of probiotic therapy in acute, severe dehydrating diarrhea. *Journal of Pediatric Gastroenterology and Nutrition* 2003;36(1):112–5.

Cetina-Sauri G, Sierra Basto G. Evaluation of *Saccharomyces boulardii* in children with acute diarrhea [Evaluation thérapeutique de *Saccharomyces boulardii* chez des enfants souffrant de diarrhée aiguë]. *Annales de Pediatrie* 1994;41(6):397–400.

Chapoy P. Treatment of acute infantile diarrhea: controlled trial of *Saccharomyces boulardii* [Traitement des diarrhées aiguës infantiles]. *Annales de Pediatrie* 1985;32(6):561–3.

- D'Apuzzo V, Salzberg R. The treatment of acute diarrhoea in paediatrics using *Streptococcus faecium*: results of a double blind trial [Die Behandlung der akuten Diarrho in der Padiatrie mit *Streptococcus faecium*: Resultae einer doppelblindstudie]. *Therapeutische Umschau* 1982;39(12):1033–5.
- Dubey AP, Rajeshwari K, Chakravarty A, et al. Use of VSL#3 in the treatment of rotavirus diarrhea in children: preliminary results. *Journal of Clinical Gastroenterology* 2008;42 Suppl 3 Pt 1:S126–9.
- Guandalini S, Pensabene L, Zikri MA, et al. Lactobacillus GG administered in oral rehydration solution to children with acute diarrhoea: a multicenter European trial. *Journal of Pediatric Gastroenterology and Nutrition* 2000;30(1):54–60.
- Guarino A, Canani RB, Spagnuolo MI, et al. Oral bacterial therapy reduces the duration of symptoms and viral excretion in children with mild diarrhoea. *Journal of Pediatric Gastroenterology and Nutrition* 1997;25(5):516–9.
- Henker J, Laass M, Blokhin BM, et al. The probiotic *E. coli* strain Nissle 1917 (EcN) stops acute diarrhoea in infants and toddlers. *European Journal of Paediatrics* 2007;166(4):311–318.
- Henker J, Laass MW, Blokhin BM, et al. probiotic *E. coli* Nissle 1917 versus placebo for treating diarrhea of greater than 4 days duration in infants and toddlers. *The Pediatric Infectious Disease Journal* 2008;27(6):494–99.
- Hernandez CL, Pineda EE, Jimenez MIR, et al. Clinical therapeutic affect of *Saccharomyces boulardii* on children with acute diarrhea. *Revista de Enfermedades Infecciosas en Pediatria* March 1998;11(43):87–9.
- Htwe K, Yee K.S, Tin M, et al. Effect of *Saccharomyces boulardii* in the treatment of acute watery diarrhea in Myanmar children: a randomized control study. *American Journal of Tropical Medicine and Hygiene* 2008;78(2):214–16.
- Isolauri E, Kaila M, Mykkanen H, et al. Oral bacteriotherapy for viral gastroenteritis. *Digestive Diseases and Sciences* 1994;39(12):2595–600.
- Jasinski C, Tanzi MN, Schelotto F, et al. Efficacy of Lactobacillus GG in oral rehydration solution [Efectop del Lactobacillus casei administrado en el suero de rehidratacion oral, en el tratamiento de la enfermedad diarreica aguda]. *Pediatrica* 2002;22(7):231–43.
- Khanna V, Seema A, Ashraf M, et al. Efficacy of tyndalized lactobacillus acidophilus in acute diarrhoea. *Indian Journal of Pediatrics* 2005;72(11):935–8.
- Kianifar HR, Farid R, Ahanchian H, et al. A. Probiotics in the treatment of acute diarrhea in young children. *Iranian Journal of Medical Sciences* 2009;34(3):204–7.

Kowalska-Duplaga K, Strus M, Heczko P, et al. Lactobif, a marketed probiotic product containing *Bifidobacterium ruminantium*, was not effective in the treatment of acute rotavirus diarrhoea in infants. *Gut* 1999;44:17–25.

Kowalska-Duplaga K, Krzysztof F, Szajewska H, et al. Efficacy of Trilac® in the treatment of acute diarrhoea in infants and young children - a multicentre, randomised, double blind placebo-controlled study. *Pediatrics Wspolczesna, Gastroenterologia, Hepatologia i Zywienie Dziecka* 2004;6(3):295–9.

Kurugol Z, Koturoglu G. Effects of *Saccharomyces boulardii* in children with acute diarrhoea. *Acta Paediatrica* 2005;94(1):44–7.

Lee M-C, Lin L-H, Hung K-L, et al. Oral bacterial therapy promotes recovery from acute diarrhoea in children. *Acta Paediatrica Taiwan* 2001;42(5):301–5.

Lievin-Le Maol V, Sarrazin-Davilla L.E, Servin A.L. An experimental study and a randomized, double-blind, placebo-controlled clinical trial to evaluate the antisecretory activity of *Lactobacillus acidophilus* strain LB against nonrotavirus diarrhea. *Pediatrics* 2007;120(4):795–803.

Mao M, Yu T, Xiong Y, Wang Z, et al. Effect of a lactose-free milk formula supplemented with bifidobacteria and streptococci on the recovery from acute diarrhoea. *Asia Pacific Journal of Clinical Nutrition* 2008;17(1):30–4.

Narayanappa D. Randomized double blinded controlled trial to evaluate the efficacy and safety of Bifilac in patients with acute viral diarrhea. *Indian Journal of Pediatrics* 2008;75(7):709–13.

Oandasan M, Gatcheco F, Kapahmagan S. Randomized, double blind placebo-controlled clinical trial on the efficacy and safety of Inflan berna capsules in the treatment of acute non-bloody diarrhea in infants. 1999. Unpublished data reported in Allen 2010.

Pant AR, Graham SM, Allen SJ, et al. *Lactobacillus GG* and acute diarrhoea in young children in the tropics. *Journal of Tropical Pediatrics* 1996;42(3):162–5.

Rafeey M, Ostadrahimi A, Boniadi M, et al. *Lactobacillus acidophilus* yogurt and supplement in children with acute diarrhea: a clinical trial. *Research Journal of Medical Sciences* 2008;2(1):13–18.

Raza S, Graham SM, Allen SJ, et al. *Lactobacillus GG* promotes recovery from acute nonbloody diarrhoea in Pakistan. *The Pediatric Infectious Disease Journal* 1995;14(2):107–11.

Rosenfeldt V, Michaelsen KF, Jakobsen M, et al. Effect of probiotic *Lactobacillus* strains in young children hospitalized with acute diarrhea. *The Pediatric Infectious Disease Journal* 2002;21(5):411–6.

Rosenfeldt V, Michaelsen KF, Jakobsen M, et al. Effect of probiotic Lactobacillus strains on acute diarrhea in a cohort of nonhospitalized children attending day-care centers. *The Pediatric Infectious Disease Journal* 2002;21(5):417–9.

Ritchie BK, Brewster DR, Tran CD, et al. Efficacy of Lactobacillus GG in Aboriginal children with acute diarrhoeal disease: a randomised clinical trial. *Journal of Pediatric Gastroenterology and Nutrition* 2010;50(6):619–24.

Sarker SA, Sultana S, Fuchs GJ, et al. Lactobacillus paracasei strain ST11 has no effect on rotavirus but ameliorates the outcome of nonrotavirus diarrhea in children from Bangladesh. *Pediatrics* 2005;116(2):e221–8.

Shornikova AV, Isolauri E, Burkanova L, et al. A trial in the Karelian Republic of oral rehydration and Lactobacillus GG for treatment of acute diarrhoea. *Acta Paediatrica* 1997;86(5):460–5.

Shornikova AV, Casas IA, Mykkanen H, et al. Bacteriotherapy with Lactobacillus reuteri in rotavirus gastroenteritis. *The Pediatric Infectious Disease Journal* 1997;16(12):1103–7.

Shornikova AV, Casas IA, Isolauri E, et al. Lactobacillus reuteri as a therapeutic agent in acute diarrhea in young children. *Journal of Pediatric Gastroenterology and Nutrition* 1997;24(4):399–404.

Szymanski H, Pejcz J, Jawien M, et al. Treatment of acute infectious diarrhoea in infants and children with a mixture of three Lactobacillus rhamnosus strains -- a randomized, double-blind, placebocontrolled trial. *Alimentary Pharmacology and Therapeutics* 2006;23(2):247–53.

Simakachorn N, Pichaipat V, Rithipornpaisarn P, et al. Clinical evaluation of the addition of lyophilized, heat-killed Lactobacillus acidophilus LB to oral rehydration therapy in the treatment of acute diarrhoea in children. *Journal of Pediatric Gastroenterology and Nutrition* 2000;30(1):68–72.

Sugita T, Togawa M. Efficacy of Lactobacillus preparation bioactis powder in children with rotavirus enteritis. *Japan Journal of Pediatrics* 1994;47:2755–62.

Teran CG, Teran-Escalera CN, Villarroel P. Nitazoxanide vs. probiotics for the treatment of acute rotavirus diarrhea in children: a randomized, single-blind, controlled trial in Bolivian children. *International Journal of Infectious Diseases* 2009;13(4):518-23.

Urganci N, Polat T, Uysalol M, et al. Evaluation of the efficacy of Saccharomyces boulardii in children with acute diarrhoea. *Archives of Gastroenterohepatology* 2001;20(3-4):81–3.

Villarruel G, Rubio DM, Lopez F, et al. Saccharomyces boulardii in acute childhood diarrhea: a randomised placebo controlled study. *Acta Paediatrica* 2007;96(4):538–41.

Vivatvakin B, Kowitdamrong E. Randomized control trial of live *Lactobacillus acidophilus* plus *Bifidobacterium infantis* in treatment of infantile acute watery diarrhea. *Journal of the Medical Association of Thailand* 2006;89:Suppl 3:S126-33.

Abbaskhanian A, Rezai MS, Karami H, et al. The effect of fermented yogurt on rotavirus diarrhea in children. *Journal of Society for development in new net environment in B&H* 2012;6(5):1600-4.

Aggarwal S, Upadhyay A, Shah D, et al. *Lactobacillus GG* for treatment of acute childhood diarrhoea: An open labelled, randomized controlled trial. *Indian J Med Res* 2014;139:379-85

Burki MFK, Jabeen F. Efficacy of *Saccharomyces Boulardii* in Children with Acute Diarrhea. *Med Forum* 2017;28(2):112-16

Chau TTH, Chau NNM, Le NTH, et al. A Double-blind, Randomized, Placebo-controlled Trial of *Lactobacillus acidophilus* for the Treatment of Acute Watery Diarrhea in Vietnamese Children. *Pediatr Infect Dis J* 2018;37:35–42

Das S, Gupta PK, Das RR. Efficacy and Safety of *Saccharomyces boulardii* in Acute Rotavirus Diarrhea: Double Blind Randomized Controlled Trial from a Developing Country. *Journal of Tropical Pediatrics* 2016;62:464-70

Dinleyici EC, PROBAGE Study Group, Vandenplas Y. *Lactobacillus reuteri* DSM 17938 effectively reduces the duration of acute diarrhoea in hospitalised children. *Acta Paediatr.* 2014 Jul;103(7):e300-5

Dinleyici EC, Kara A, Dalgic N, et al. *Saccharomyces boulardii* CNCM I-745 reduces the duration of diarrhoea, length of emergency care and hospital stay in children with acute diarrhoea. *Benef Microbes.* 2015;6(4):415-21

El-Soud NHA, Said RN, Mosallam DS, et al. *Bifidobacterium lactis* in Treatment of Children with Acute Diarrhea. A Randomized Double Blind Controlled Trial. *Macedonian Journal of Medical Sciences* 2015; 3(3):403-7.

Erdogan O, Tanyeri B, Torun E, et al. The Comparison of the Efficacy of Two Different Probiotics in Rotavirus Gastroenteritis in Children. *J Trop Med* 2012;2012:787240

Francavilla R, Lionetti E, Castellaneta S, et al. Randomised clinical trial: *Lactobacillus reuteri* DSM 17938 vs. placebo in children with acute diarrhoea - a double-blind study. *Aliment Pharmacol Ther* 2012; 36: 363–69.

Freedman SB, Sherman PM, Willan A, et al. Emergency Department Treatment of Children With Diarrhea Who Attend Day Care: A Randomized Multidose Trial of a *Lactobacillus helveticus* and *Lactobacillus rhamnosus* Combination Probiotic. *Clinical Pediatrics* 2015;54(12) 1158–66.

Freedman SB, Williamson-Urquhart S, Farion KJ, et al. Multicenter Trial of a Combination Probiotic for Children with Gastroenteritis. *N Engl J Med* 2018;379:2015-26.

Grandy G, Medina M, Soria R, et al. Probiotics in the treatment of acute rotavirus diarrhoea. A randomized, double-blind, controlled trial using two different probiotic preparations in Bolivian children. *BMC Infectious Diseases* 2010;10:253.

Hegar B, Waspada IMI, Gunardi H, et al. A Double Blind Randomized Trial Showing Probiotics to be Ineffective in Acute Diarrhea in Indonesian Children. *Indian J Pediatr* 2015;82(5):410–14.

Huang YF, Liu PY, Chen YY, et al. Three-combination probiotics therapy in children with salmonella and rotavirus gastroenteritis. *J Clin Gastroenterol* 2014;48:37–42.

Lee DK, Park JE, Kim MJ, et al. Probiotic bacteria, *B. longum* and *L. acidophilus* inhibit infection by rotavirus in vitro and decrease the duration of diarrhea in pediatric patients. *Clinics and Research in Hepatology and Gastroenterology* 2015;39:237—44.

Nixon AF, Cunningham SJ, Cohen HW, et al. The Effect of *Lactobacillus GG* (LGG) on Acute Diarrheal Illness in the Pediatric Emergency Department (PED). *Pediatr Emerg Care* 2012;28(10): 1048–1051.

Phavichitr N, Puwdee P, Tantibhaedhyangkul R. Cost-Benefit Analysis of the Probiotic Treatment of Children Hospitalized for Acute Diarrhea in Bangkok, Thailand. *Southeast Asian J Trop Med Public Health*. 2013 Nov;44(6):1065-71.

Rerksuppaphol S, Rerksuppaphol L. *Lactobacillus acidophilus* and *Bifidobacterium bifidum* stored at ambient temperature are effective in the treatment of acute diarrhoea. *Annals of Tropical Paediatrics* (2010) 30, 299–304.

Riaz M, Alam S, Malik A, et al. Efficacy and Safety of *Saccharomyces boulardii* in Acute Childhood Diarrhea: A Double Blind Randomised Controlled Trial. *Indian J Pediatr* 2012;79(4):478–482.

Schnadower D, Tarr PI, Casper TC, et al. *Lactobacillus rhamnosus GG* versus Placebo for Acute Gastroenteritis in Children. *N Engl J Med* 2018;379:2002-14.

Sharif MR, Kashani HH, Ardakani AT, et al. The Effect of a Yeast Probiotic on Acute Diarrhea in Children. *Probiotics Antimicrob Proteins*. 2016 Dec;8(4):211-21.

Sindhu KNC, Sowmyanarayanan TV, Paul A, et al. Immune Response and Intestinal Permeability in Children With Acute Gastroenteritis Treated With *Lactobacillus rhamnosus* GG: A Randomized, Double-Blind, Placebo-Controlled Trial. *Clinical Infectious Diseases* 2014;58(8):1107–15.



**Question:** Probiotics compared to placebo and/or standard care alone for treatment of acute infectious diarrhea in children

**Bibliography:** Allen 2010 + 23 studies

| Certainty assessment |              |              |               |              |             |                      | № of patients |                                    | Effect            |                   | Certainty | Importance |
|----------------------|--------------|--------------|---------------|--------------|-------------|----------------------|---------------|------------------------------------|-------------------|-------------------|-----------|------------|
| № of studies         | Study design | Risk of bias | Inconsistency | Indirectness | Imprecision | Other considerations | probiotics    | placebo and/or standard care alone | Relative (95% CI) | Absolute (95% CI) |           |            |

**Mean Duration of Diarrhea**

|    |                   |                        |                      |             |             |      |      |      |   |                                               |             |          |
|----|-------------------|------------------------|----------------------|-------------|-------------|------|------|------|---|-----------------------------------------------|-------------|----------|
| 58 | randomised trials | serious <sub>a,b</sub> | serious <sup>c</sup> | not serious | not serious | none | 4662 | 4556 | - | mean 21.91 lower (27.64 lower to 16.17 lower) | ⊕⊕○○<br>LOW | CRITICAL |
|----|-------------------|------------------------|----------------------|-------------|-------------|------|------|------|---|-----------------------------------------------|-------------|----------|

**Diarrhea Lasting > 4 days**

|    |                   |                        |                      |             |             |      |                  |                  |                        |                                                   |             |          |
|----|-------------------|------------------------|----------------------|-------------|-------------|------|------------------|------------------|------------------------|---------------------------------------------------|-------------|----------|
| 29 | randomised trials | serious <sub>a,b</sub> | serious <sup>c</sup> | not serious | not serious | none | 312/1607 (19.4%) | 615/1532 (40.1%) | RR 0.50 (0.40 to 0.62) | 201 fewer per 1,000 (from 241 fewer to 153 fewer) | ⊕⊕○○<br>LOW | CRITICAL |
|----|-------------------|------------------------|----------------------|-------------|-------------|------|------------------|------------------|------------------------|---------------------------------------------------|-------------|----------|

**Mean Stool Frequency on Day 2**

| Certainty assessment |                   |                        |                      |              |             |                      | № of patients |                                    | Effect            |                                          | Certainty   | Importance |
|----------------------|-------------------|------------------------|----------------------|--------------|-------------|----------------------|---------------|------------------------------------|-------------------|------------------------------------------|-------------|------------|
| № of studies         | Study design      | Risk of bias           | Inconsistency        | Indirectness | Imprecision | Other considerations | probiotics    | placebo and/or standard care alone | Relative (95% CI) | Absolute (95% CI)                        |             |            |
| 20                   | randomised trials | serious <sup>a,b</sup> | serious <sup>c</sup> | not serious  | not serious | none                 | 1388          | 1363                               | -                 | MD 0.8 lower (1.14 lower to 0.045 lower) | ⊕⊕○○<br>LOW | CRITICAL   |

#### Diarrhea Lasting > 3 days

|    |                   |                        |                      |             |             |      |                  |                  |                               |                                                          |             |          |
|----|-------------------|------------------------|----------------------|-------------|-------------|------|------------------|------------------|-------------------------------|----------------------------------------------------------|-------------|----------|
| 30 | randomised trials | serious <sup>a,b</sup> | serious <sup>c</sup> | not serious | not serious | none | 558/1516 (36.8%) | 888/1506 (59.0%) | <b>RR 0.62</b> (0.56 to 0.70) | <b>224 fewer per 1,000</b> (from 259 fewer to 177 fewer) | ⊕⊕○○<br>LOW | CRITICAL |
|----|-------------------|------------------------|----------------------|-------------|-------------|------|------------------|------------------|-------------------------------|----------------------------------------------------------|-------------|----------|

#### Mean Stool Frequency on Day 3

|    |                   |                        |                      |             |             |      |      |      |   |                                          |             |          |
|----|-------------------|------------------------|----------------------|-------------|-------------|------|------|------|---|------------------------------------------|-------------|----------|
| 14 | randomised trials | serious <sup>a,b</sup> | serious <sup>c</sup> | not serious | not serious | none | 1194 | 1173 | - | MD 0.63 lower (1.18 lower to 0.07 lower) | ⊕⊕○○<br>LOW | CRITICAL |
|----|-------------------|------------------------|----------------------|-------------|-------------|------|------|------|---|------------------------------------------|-------------|----------|

CI: Confidence interval; RR: Risk ratio; MD: Mean difference

## **Explanations**

- a. Several studies with unclear sequence generation, allocation concealment, or open with no blinding (some without placebo)
- b. Several studies with follow up < 90%
- c. Significant heterogeneity across studies due to difference in study design, probiotic strains used, single vs. combination of probiotics, age of participants, and setting

Mean Duration of Diarrhea:

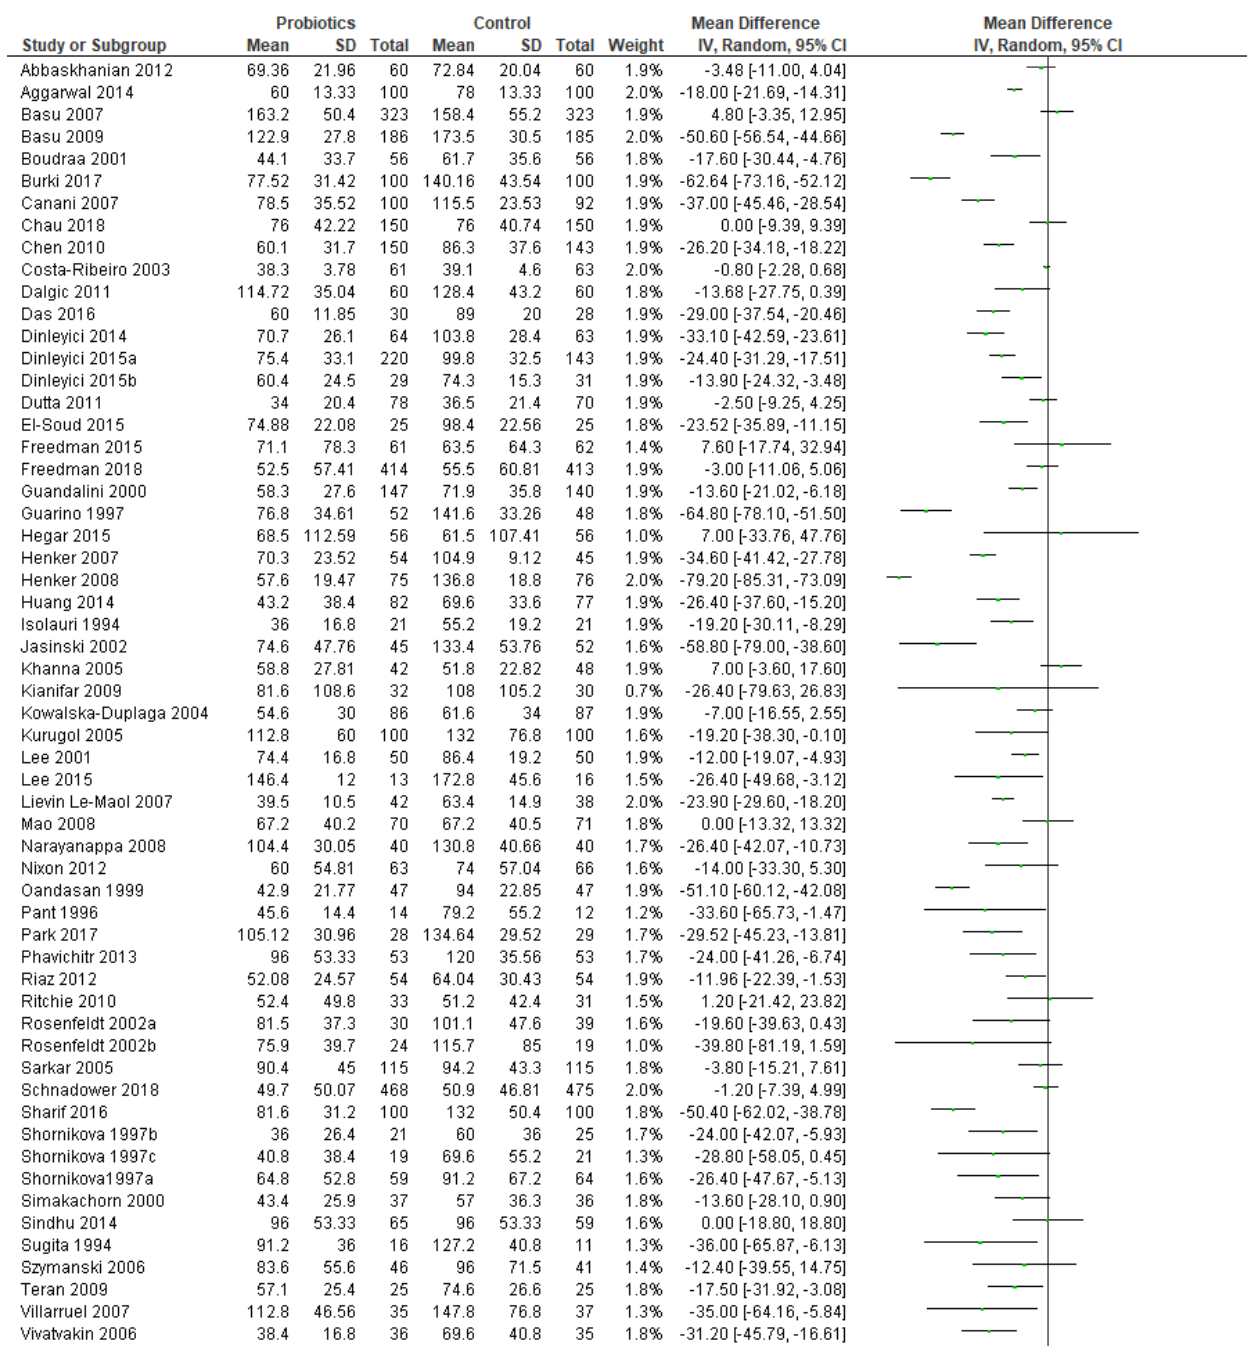

Total (95% CI) 4662 4556 100.0% -21.91 [-27.64, -16.17]

Heterogeneity: Tau<sup>2</sup> = 428.65; Chi<sup>2</sup> = 1408.81, df = 57 (P < 0.00001); I<sup>2</sup> = 96%

Test for overall effect: Z = 7.49 (P < 0.00001)

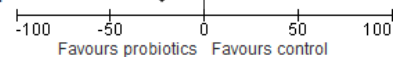

Proportion with Diarrhea  $\geq$  4 days:

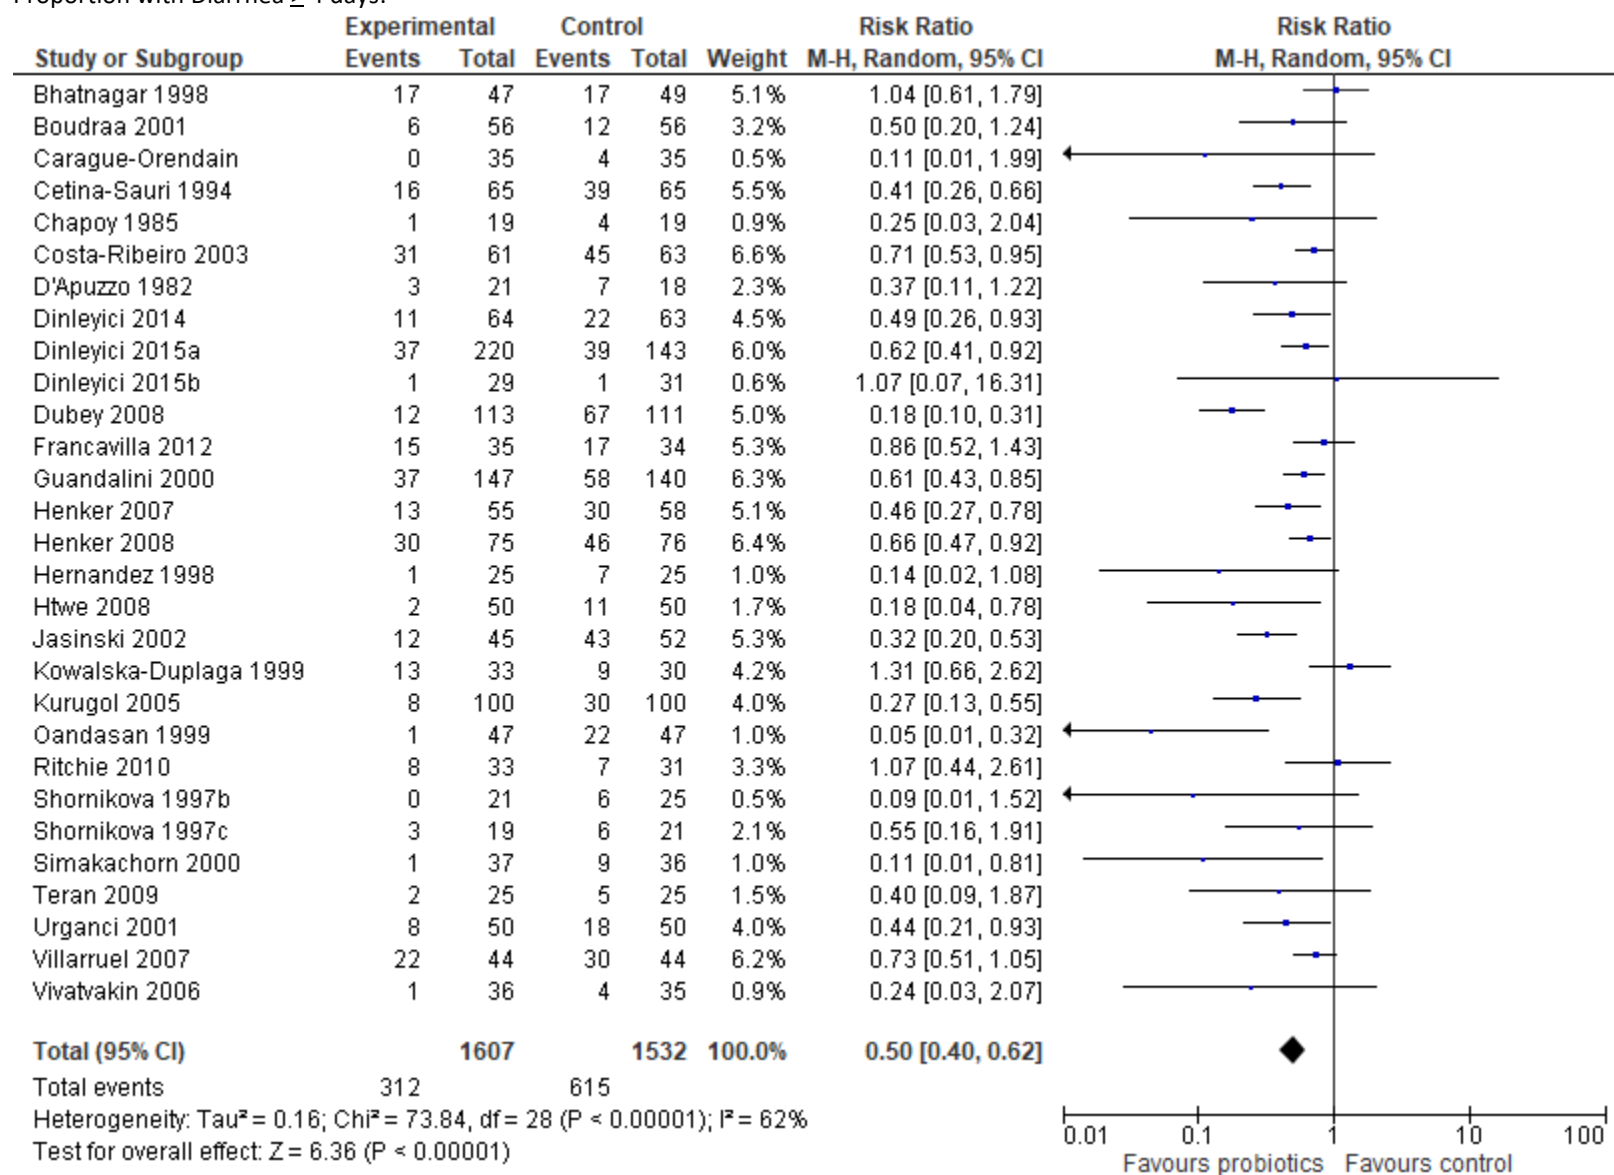

**Question:** *Saccharomyces boulardii* compared to placebo and/or standard care in patients with signs and/or symptoms suggestive of acute infectious gastroenteritis (7a)

**Bibliography:** Burki 2017, Cetina-Sauri 1994, Chapoy 1985, Das 2016, Dinleyici 2015, Erdogan 2012, Hernandez 1998, Htwe 2008, Kurugol 2005, Riaz 2012, Sharif 2016, Urganci 2001, Villarruel 2007, Grandy 2010

| Certainty assessment |              |              |               |              |             |                      | № of patients       |                              | Effect            |                   | Certainty | Importance |
|----------------------|--------------|--------------|---------------|--------------|-------------|----------------------|---------------------|------------------------------|-------------------|-------------------|-----------|------------|
| № of studies         | Study design | Risk of bias | Inconsistency | Indirectness | Imprecision | Other considerations | <i>S. boulardii</i> | placebo and/or standard care | Relative (95% CI) | Absolute (95% CI) |           |            |

**Diarrhea Lasting > 4 days**

|   |                   |                           |                      |             |                      |      |                |                 |                        |                                                   |                  |          |
|---|-------------------|---------------------------|----------------------|-------------|----------------------|------|----------------|-----------------|------------------------|---------------------------------------------------|------------------|----------|
| 8 | randomised trials | very serious <sup>a</sup> | serious <sup>b</sup> | not serious | serious <sup>c</sup> | none | 95/501 (19.0%) | 169/425 (39.8%) | RR 0.45 (0.32 to 0.64) | 219 fewer per 1,000 (from 270 fewer to 143 fewer) | ⊕○○○<br>VERY LOW | CRITICAL |
|---|-------------------|---------------------------|----------------------|-------------|----------------------|------|----------------|-----------------|------------------------|---------------------------------------------------|------------------|----------|

**Duration of Diarrhea**

|    |                   |                           |                      |             |                      |      |     |        |   |                                              |                  |          |
|----|-------------------|---------------------------|----------------------|-------------|----------------------|------|-----|--------|---|----------------------------------------------|------------------|----------|
| 10 | randomised trials | very serious <sup>a</sup> | serious <sup>d</sup> | not serious | serious <sup>e</sup> | none | 745 | 667647 | - | mean 28.77lower (40.35 lower to 17.18 lower) | ⊕○○○<br>VERY LOW | CRITICAL |
|----|-------------------|---------------------------|----------------------|-------------|----------------------|------|-----|--------|---|----------------------------------------------|------------------|----------|

CI: Confidence interval; RR: Risk ratio

## Explanations

- a. Most studies have at least one source of high risk of bias including lack of blinding (open study), sequence generation, or allocation concealment
- b. Heterogeneity among studies ( $I^2 = 57\%$ ) due to differences in study design, participant age, and setting

- c. CI crossing 1 in several studies including study with weight of 25%
- d. Heterogeneity among studies ( $I^2 = 89\%$ ) due to differences in study design, participant age, and setting
- e. The 95% CI includes the potential for both benefit and harm. Few events reported do not meet the optimal information size and suggest fragility in the estimate.

Duration  $\geq 4$  days

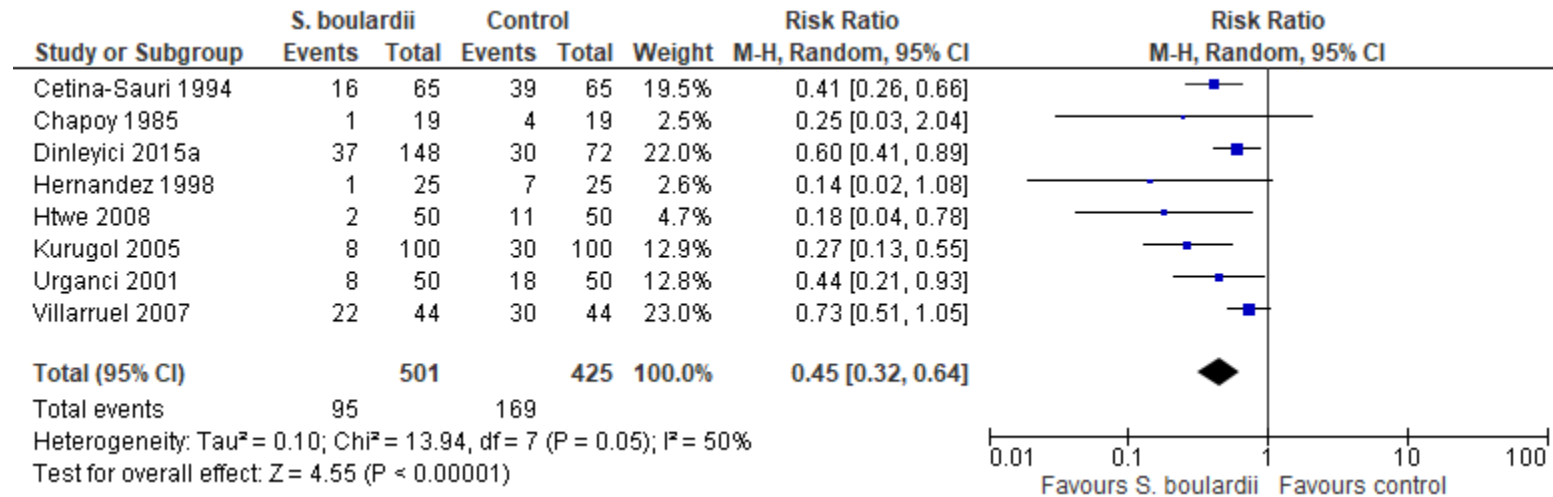

Mean Duration of Diarrhea:

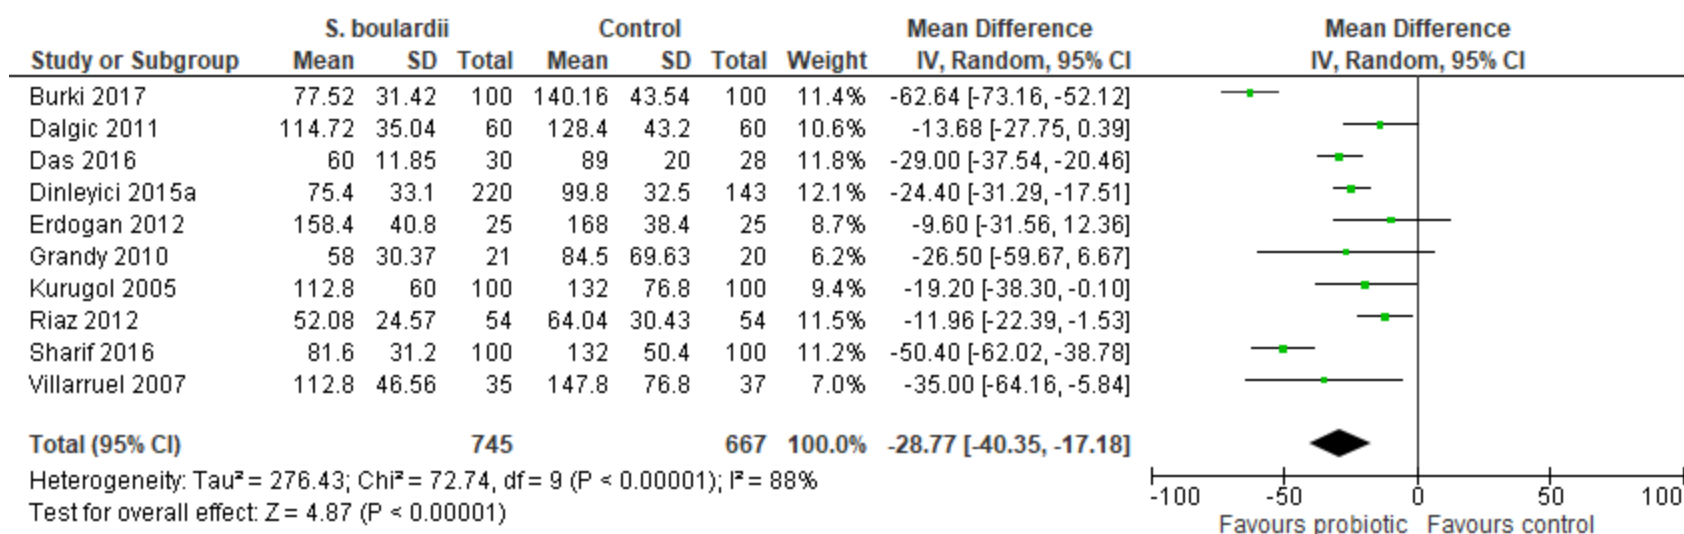



**Question:** *Lactobacillus rhamnosus* ATCC 53103 compared to placebo in patients with signs and/or symptoms suggestive of acute infectious gastroenteritis (7b)

**Bibliography:** Aggarwal 2014, Basu 2007, Basu 2009, Canani 2007, Costa-Ribeiro 2003, Guandalini 2000, Guarino 1997, Isolauri 1994, Jasinski 2002, Nixon 2012, Pant 1996, Raza 1995, Ritchie 2010, Schnadower 2018, Shornikova 1997a, Sindhu 2014

| Certainty assessment |              |              |               |              |             |                      | № of patients                  |         | Effect            |                   | Certainty | Importance |
|----------------------|--------------|--------------|---------------|--------------|-------------|----------------------|--------------------------------|---------|-------------------|-------------------|-----------|------------|
| № of studies         | Study design | Risk of bias | Inconsistency | Indirectness | Imprecision | Other considerations | <i>L. rhamnosus</i> ATCC 53103 | placebo | Relative (95% CI) | Absolute (95% CI) |           |            |

**Mean Duration of Diarrhea**

|    |                   |                      |                      |             |             |      |      |      |   |                                                        |             |          |
|----|-------------------|----------------------|----------------------|-------------|-------------|------|------|------|---|--------------------------------------------------------|-------------|----------|
| 14 | randomised trials | serious <sup>a</sup> | serious <sup>b</sup> | not serious | not serious | none | 1672 | 1672 | - | mean 23.13<br>lower (33.94<br>lower to 12.33<br>lower) | ⊕⊕○○<br>LOW | CRITICAL |
|----|-------------------|----------------------|----------------------|-------------|-------------|------|------|------|---|--------------------------------------------------------|-------------|----------|

**Severe Infection (According to Vesikari Scale)**

|   |                   |                      |             |             |                      |      |                   |                   |                                  |                                                        |             |          |
|---|-------------------|----------------------|-------------|-------------|----------------------|------|-------------------|-------------------|----------------------------------|--------------------------------------------------------|-------------|----------|
| 2 | randomised trials | serious <sup>c</sup> | not serious | not serious | serious <sup>d</sup> | none | 74/533<br>(13.9%) | 75/534<br>(14.0%) | <b>RR 0.98</b><br>(0.73 to 1.32) | <b>3 fewer per 1,000</b><br>(from 38 fewer to 45 more) | ⊕⊕○○<br>LOW | CRITICAL |
|---|-------------------|----------------------|-------------|-------------|----------------------|------|-------------------|-------------------|----------------------------------|--------------------------------------------------------|-------------|----------|

**Hospitalization**

|   |                   |                      |             |             |                      |      |                  |                  |                                  |                                                        |             |          |
|---|-------------------|----------------------|-------------|-------------|----------------------|------|------------------|------------------|----------------------------------|--------------------------------------------------------|-------------|----------|
| 3 | randomised trials | serious <sup>c</sup> | not serious | not serious | serious <sup>d</sup> | none | 31/633<br>(4.9%) | 32/626<br>(5.1%) | <b>RR 0.96</b><br>(0.60 to 1.54) | <b>2 fewer per 1,000</b><br>(from 20 fewer to 28 more) | ⊕⊕○○<br>LOW | CRITICAL |
|---|-------------------|----------------------|-------------|-------------|----------------------|------|------------------|------------------|----------------------------------|--------------------------------------------------------|-------------|----------|

| Certainty assessment |              |              |               |              |             |                      | № of patients                  |         | Effect            |                   | Certainty | Importance |
|----------------------|--------------|--------------|---------------|--------------|-------------|----------------------|--------------------------------|---------|-------------------|-------------------|-----------|------------|
| № of studies         | Study design | Risk of bias | Inconsistency | Indirectness | Imprecision | Other considerations | <i>L. rhamnosus</i> ATCC 53103 | placebo | Relative (95% CI) | Absolute (95% CI) |           |            |

#### Diarrhea > 4 days

|   |                   |                      |                      |             |             |      |                |                 |                                  |                                                             |             |          |
|---|-------------------|----------------------|----------------------|-------------|-------------|------|----------------|-----------------|----------------------------------|-------------------------------------------------------------|-------------|----------|
| 4 | randomised trials | serious <sup>a</sup> | serious <sup>b</sup> | not serious | not serious | none | 88/286 (30.8%) | 153/286 (53.5%) | <b>RR 0.38</b><br>(0.27 to 0.54) | <b>332 fewer per 1,000</b><br>(from 391 fewer to 246 fewer) | ⊕⊕○○<br>LOW | CRITICAL |
|---|-------------------|----------------------|----------------------|-------------|-------------|------|----------------|-----------------|----------------------------------|-------------------------------------------------------------|-------------|----------|

#### Mean Stool Frequency Day 2

|   |                   |                      |                      |             |             |      |     |     |   |                                               |             |          |
|---|-------------------|----------------------|----------------------|-------------|-------------|------|-----|-----|---|-----------------------------------------------|-------------|----------|
| 6 | randomised trials | serious <sup>a</sup> | serious <sup>b</sup> | not serious | not serious | none | 675 | 660 | - | mean 0.75 lower<br>(1.13 lower to 0.37 lower) | ⊕⊕○○<br>LOW | CRITICAL |
|---|-------------------|----------------------|----------------------|-------------|-------------|------|-----|-----|---|-----------------------------------------------|-------------|----------|

CI: Confidence interval; RR: Risk ratio

## Explanations

- Several studies noted to have high risk of bias for either lack of blinding, low follow up rate, sequence generation, or allocation concealment
- Significant heterogeneity among studies due to differences in study design, participant age, and setting
- High risk of reporting bias with 1 study
- The 95% CI includes the potential for both benefit and harm.

Mean Duration of Diarrhea:

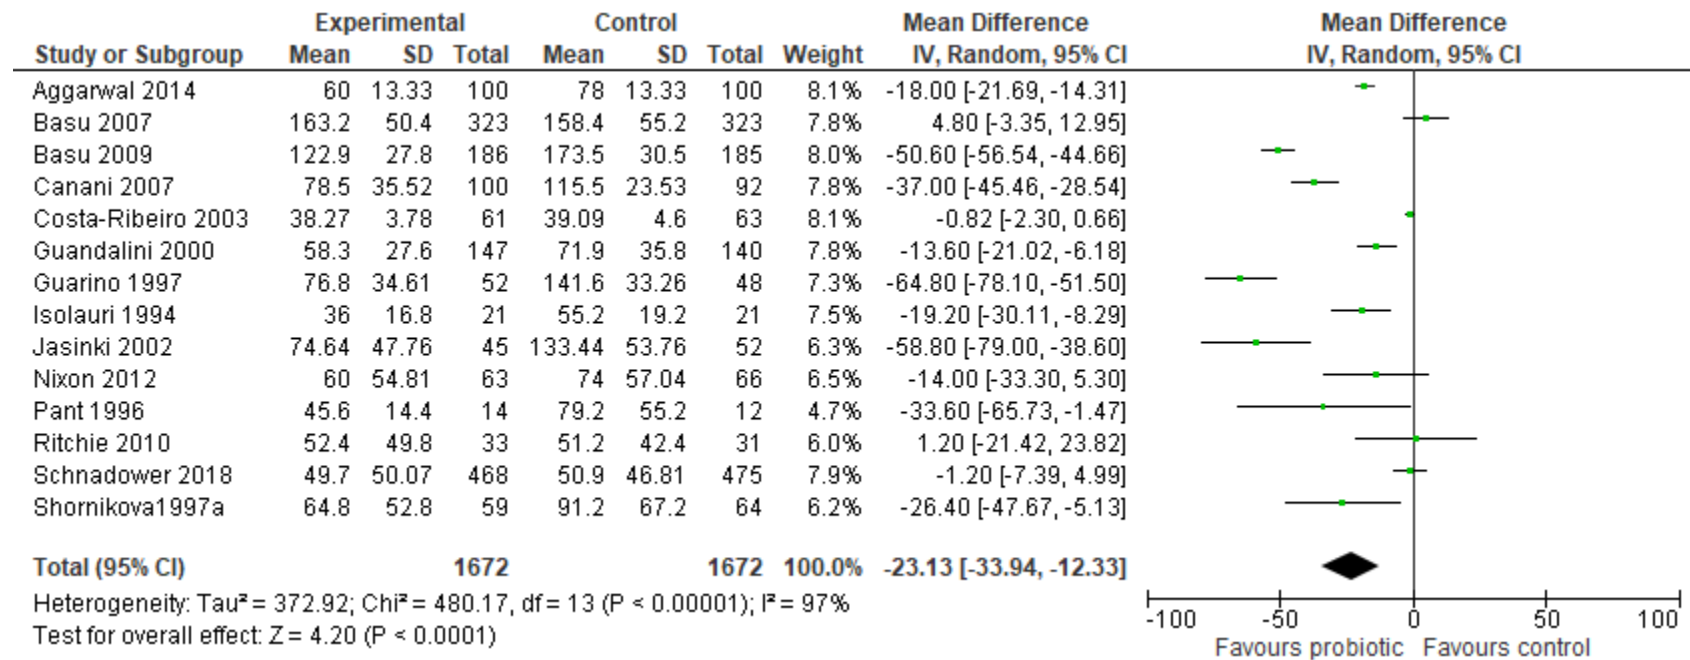

Diarrhea  $\geq$  4 days

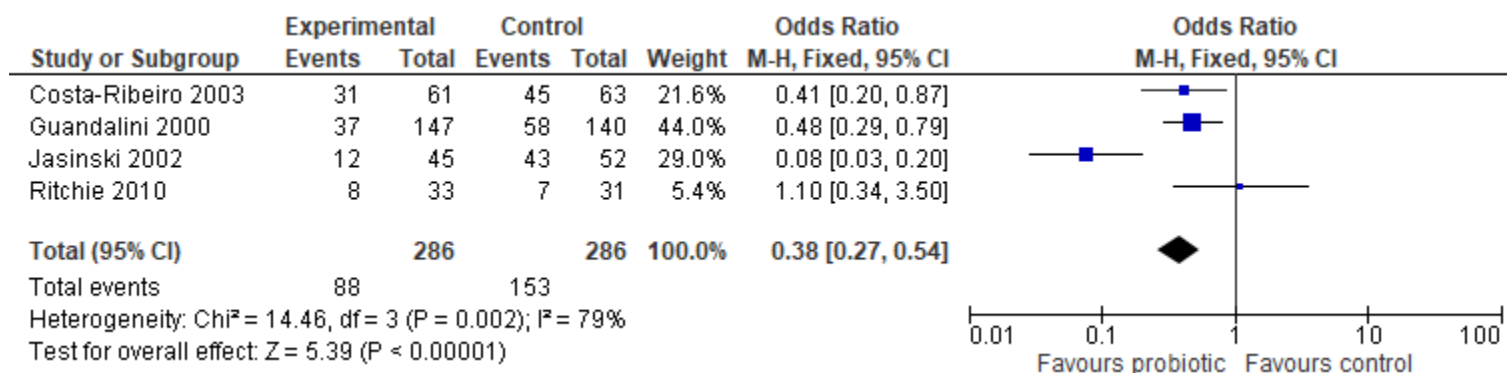

### Mean Stool Frequency Day 2

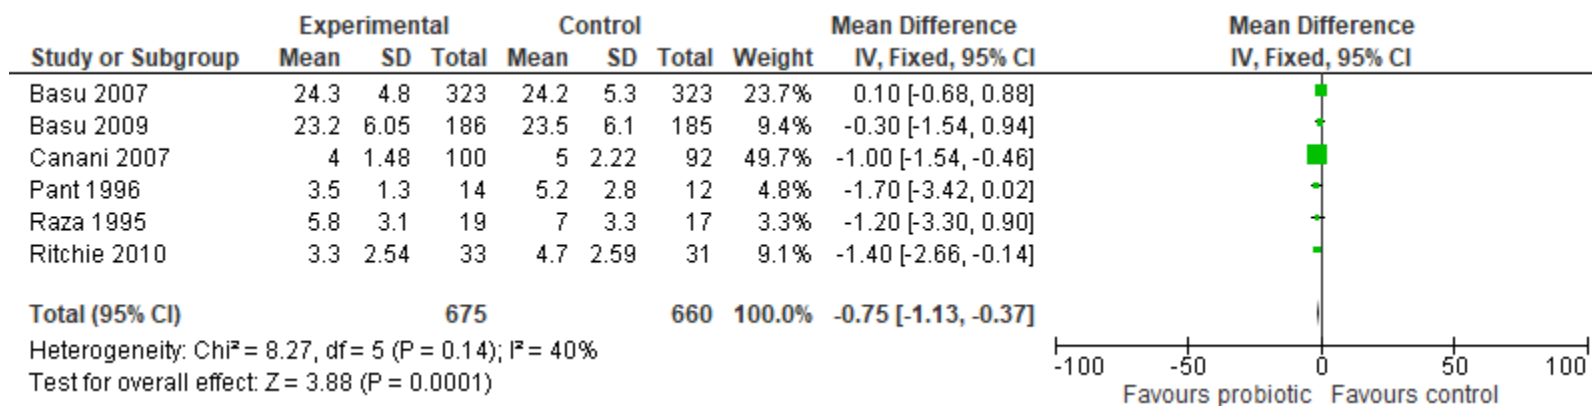

### Severe infection as per Vesikari scale:

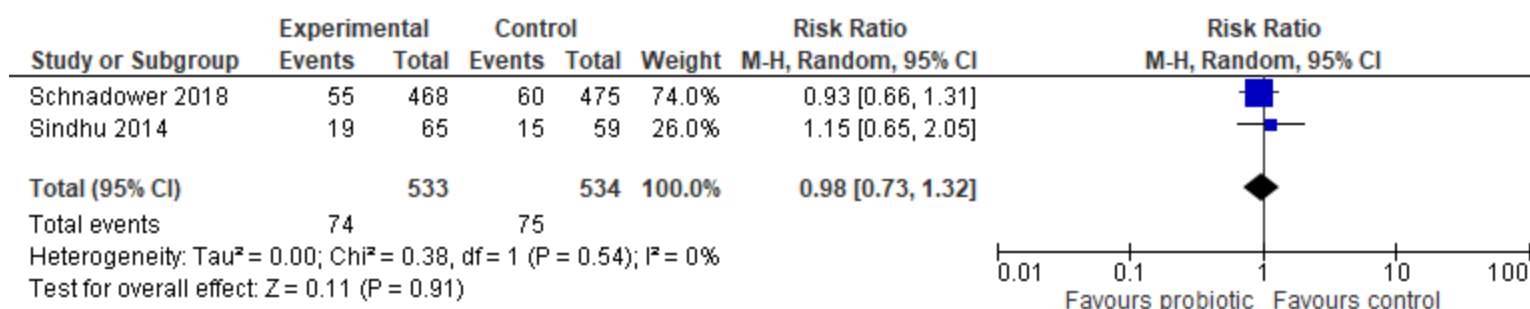

Hospitalization:

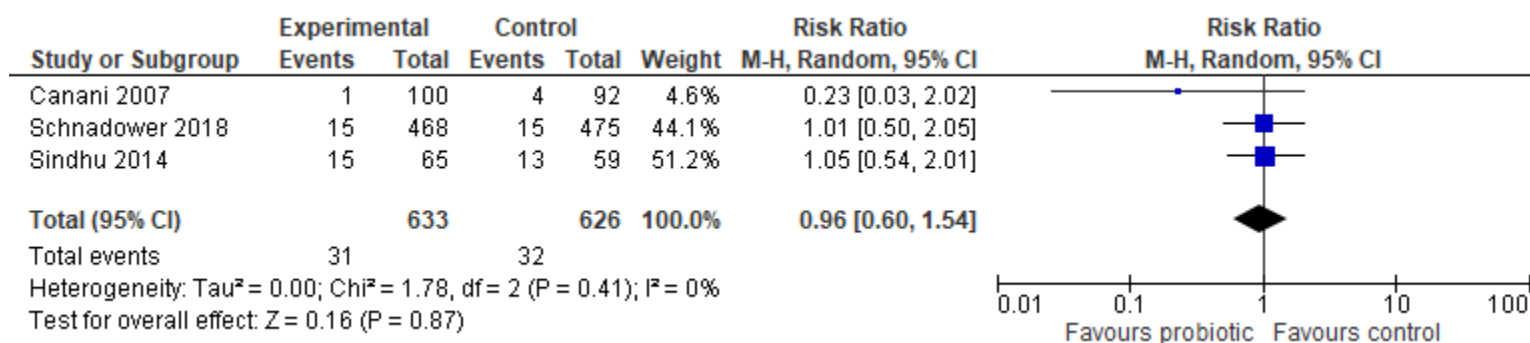

**Question:** *Lactobacillus acidophilus* compared to placebo in patients with signs and/or symptoms suggestive of acute infectious gastroenteritis (7c)

**Bibliography:** Bouilloche 1994, Khanna 2005, Lievein Le-Maol 2007, Simakachorn 2000, Chau 2018

| Certainty assessment |              |              |               |              |             |                      | № of patients         |         | Effect            |                   | Certainty | Importance |
|----------------------|--------------|--------------|---------------|--------------|-------------|----------------------|-----------------------|---------|-------------------|-------------------|-----------|------------|
| № of studies         | Study design | Risk of bias | Inconsistency | Indirectness | Imprecision | Other considerations | <i>L. acidophilus</i> | placebo | Relative (95% CI) | Absolute (95% CI) |           |            |

**Mean Duration of Diarrhea**

|   |                   |                      |                      |             |                      |      |     |     |   |                                              |                  |          |
|---|-------------------|----------------------|----------------------|-------------|----------------------|------|-----|-----|---|----------------------------------------------|------------------|----------|
| 4 | randomised trials | serious <sup>a</sup> | serious <sup>b</sup> | not serious | serious <sup>c</sup> | none | 271 | 272 | - | mean 7.79 lower (23.85 lower to 8.28 higher) | ⊕○○○<br>VERY LOW | CRITICAL |
|---|-------------------|----------------------|----------------------|-------------|----------------------|------|-----|-----|---|----------------------------------------------|------------------|----------|

**Diarrhea Lasting >3days**

|   |                   |                      |             |             |                      |      |                |                |                               |                                                       |             |          |
|---|-------------------|----------------------|-------------|-------------|----------------------|------|----------------|----------------|-------------------------------|-------------------------------------------------------|-------------|----------|
| 4 | randomised trials | serious <sup>d</sup> | not serious | not serious | serious <sup>e</sup> | none | 22/159 (13.8%) | 37/156 (23.7%) | <b>RR 0.59</b> (0.33 to 1.05) | <b>97 fewer per 1,000</b> (from 159 fewer to 12 more) | ⊕⊕○○<br>LOW | CRITICAL |
|---|-------------------|----------------------|-------------|-------------|----------------------|------|----------------|----------------|-------------------------------|-------------------------------------------------------|-------------|----------|

**CI:** Confidence interval; **RR:** Risk ratio

**Explanations**

a. Unclear or high risk of selection bias

b. Studies have different direction of effect, I<sup>2</sup> 92%

- c. The 95% CI includes the potential for both benefit and harm.
- d. Unclear or high risk of selection bias and/or performance bias
- e. Few events reported do not meet the optimal information size and suggest fragility in the estimate.

Mean Duration of Diarrhea (Hours):

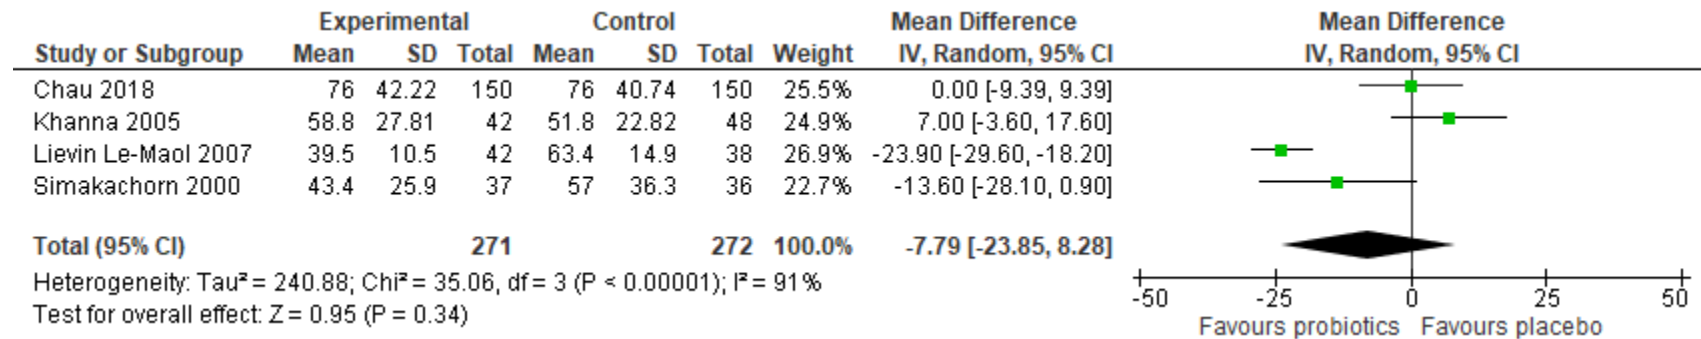

Diarrhea Lasting ≥ 3 days:

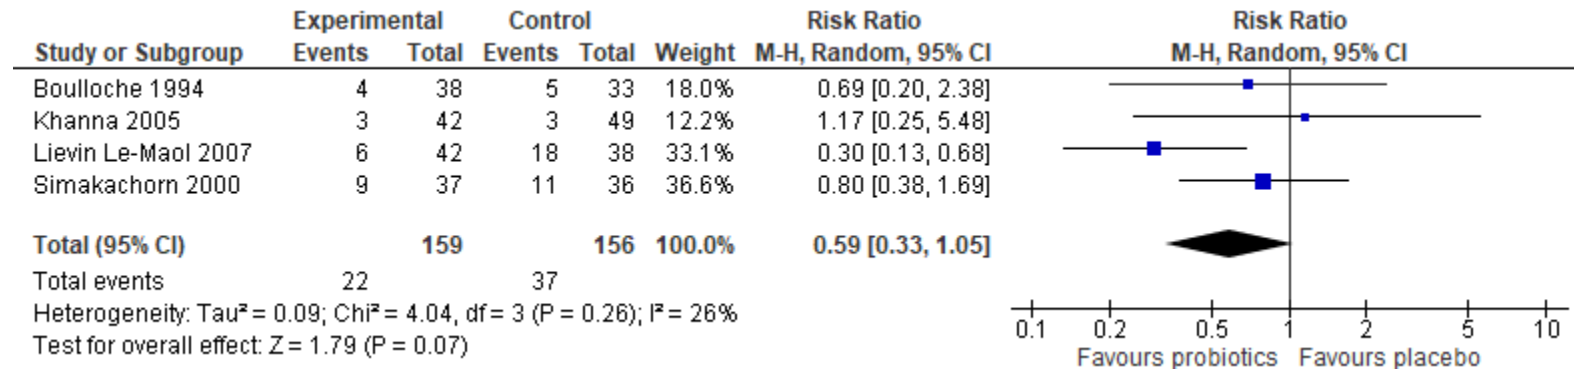

**Question:** *Lactobacillus acidophilus* + *Bifidobacterium bifidum* compared to placebo for the treatment of acute infectious diarrhea in children (7d)

**Bibliography:** Kianifar 2009, Lee 2001, Oandasan 1999, Phavichitr 2013, Rerksupphol 2010, Vivatvakin 2006

| Certainty assessment |              |              |               |              |             |                      | № of patients                             |         | Effect            |                   | Certainty | Importance |
|----------------------|--------------|--------------|---------------|--------------|-------------|----------------------|-------------------------------------------|---------|-------------------|-------------------|-----------|------------|
| № of studies         | Study design | Risk of bias | Inconsistency | Indirectness | Imprecision | Other considerations | <i>L. acidophilus</i> + <i>B. bifidum</i> | placebo | Relative (95% CI) | Absolute (95% CI) |           |            |

**Mean duration of diarrhea (assessed with: hours)**

|   |                   |                      |                      |             |             |      |     |     |   |                                                   |            |          |
|---|-------------------|----------------------|----------------------|-------------|-------------|------|-----|-----|---|---------------------------------------------------|------------|----------|
| 6 | randomised trials | serious <sup>b</sup> | serious <sup>a</sup> | not serious | not serious | none | 241 | 237 | - | MD 28.44 hours lower (45.72 lower to 11.15 lower) | ⊕⊕○<br>LOW | CRITICAL |
|---|-------------------|----------------------|----------------------|-------------|-------------|------|-----|-----|---|---------------------------------------------------|------------|----------|

**CI:** Confidence interval; **MD:** Mean difference

### Explanations

- Some inconsistency suspected based on visual inspection of the forest plot and high  $I^2$  of 89%.
- Risk of bias assessment identified unclear and high concerns among all included studies.

Mean Duration of Diarrhea:



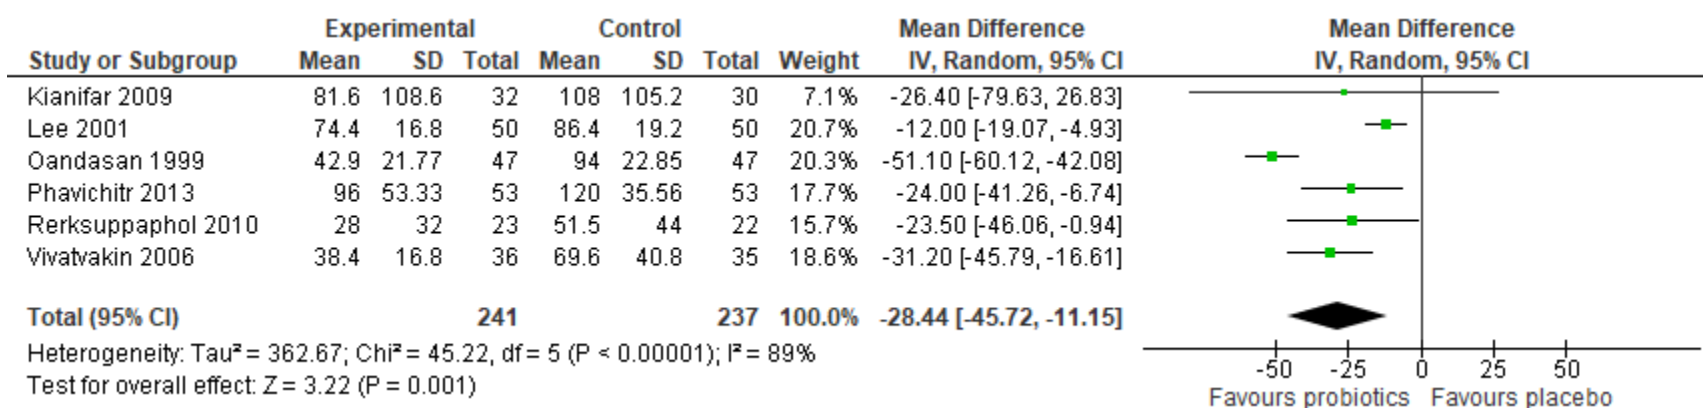

**Question:** *Lactobacillus reuteri* compared to placebo in patients with signs and/or symptoms suggestive of acute infectious gastroenteritis (7e)

**Bibliography:** Shornikova 1997b, Shornikova 1997c, Dinleyici 2015a, Dinleyici 2014, Francavilla 2012

| Certainty assessment |              |              |               |              |             |                      | No of patients    |         | Effect            |                   | Certainty | Importance |
|----------------------|--------------|--------------|---------------|--------------|-------------|----------------------|-------------------|---------|-------------------|-------------------|-----------|------------|
| No of studies        | Study design | Risk of bias | Inconsistency | Indirectness | Imprecision | Other considerations | <i>L. reuteri</i> | placebo | Relative (95% CI) | Absolute (95% CI) |           |            |

**Mean Duration of Diarrhea**

|   |                   |                      |                          |             |             |      |     |     |   |                                               |               |          |
|---|-------------------|----------------------|--------------------------|-------------|-------------|------|-----|-----|---|-----------------------------------------------|---------------|----------|
| 4 | randomised trials | serious <sup>a</sup> | not serious <sup>b</sup> | not serious | not serious | none | 133 | 140 | - | mean 24.36 lower (35.55 lower to 13.17 lower) | ⊕⊕⊕○ MODERATE | CRITICAL |
|---|-------------------|----------------------|--------------------------|-------------|-------------|------|-----|-----|---|-----------------------------------------------|---------------|----------|

**Diarrhea Lasting > 3 days**

|   |                   |                      |             |             |             |      |                |                |                               |                                                         |               |          |
|---|-------------------|----------------------|-------------|-------------|-------------|------|----------------|----------------|-------------------------------|---------------------------------------------------------|---------------|----------|
| 4 | randomised trials | serious <sup>c</sup> | not serious | not serious | not serious | none | 47/149 (31.5%) | 96/153 (62.7%) | <b>RR 0.67</b> (0.47 to 0.95) | <b>207 fewer per 1,000</b> (from 333 fewer to 31 fewer) | ⊕⊕⊕○ MODERATE | CRITICAL |
|---|-------------------|----------------------|-------------|-------------|-------------|------|----------------|----------------|-------------------------------|---------------------------------------------------------|---------------|----------|

**CI:** Confidence interval; **RR:** Risk ratio

**Explanations**

- a. Several studies with high risk of either performance bias, detection bias, or attrition bias
- b. Some heterogeneity among studies ( $I^2 = 58\%$ ); however, all are in the same direction.

c. Some studies with high risk of performance bias, detection bias, or selection bias

Mean Duration of Diarrhea:

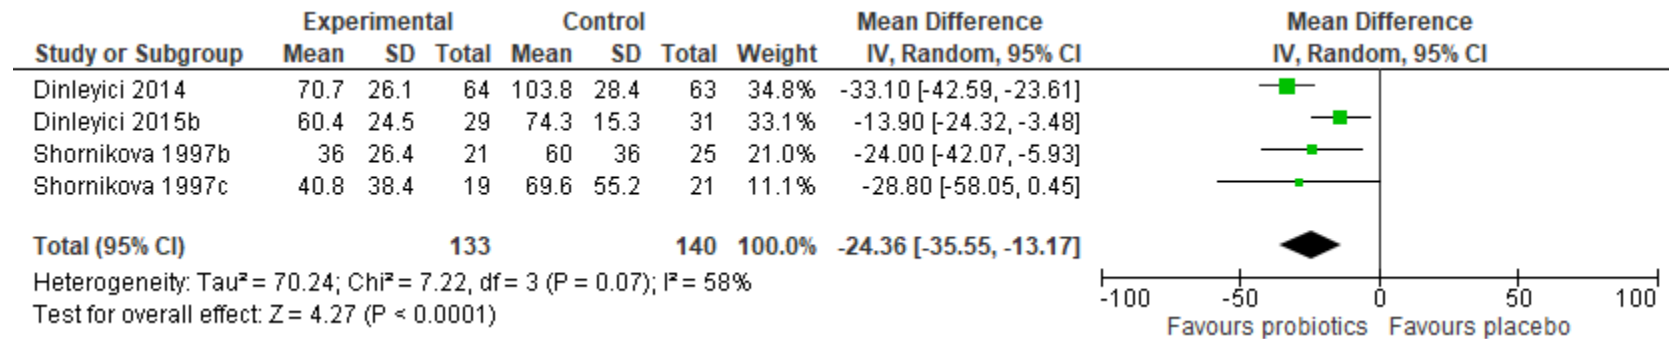

Diarrhea Lasting  $\geq 3$  days:

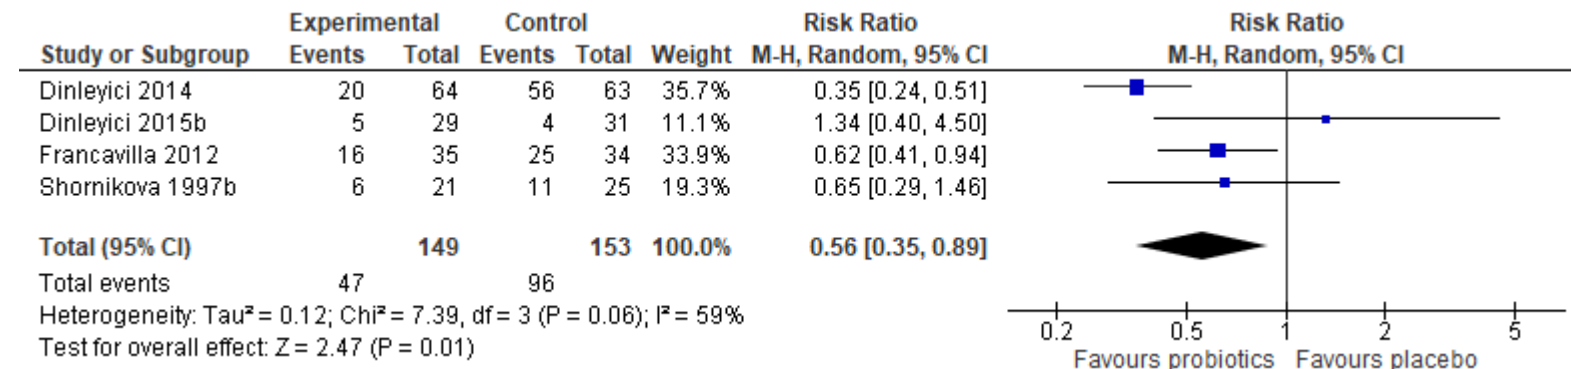

Question: *Lactobacillus helveticus* Rosell-52 + *Lactobacillus rhamnosus* Rosell-11 compared to placebo in patients with signs and/or symptoms suggestive of acute infectious gastroenteritis (7f)

Bibliography: Freedman 2015, Freedman 2018, Hegar 2015

| Certainty assessment |              |              |               |              |             |                      | № of patients                                                  |         | Effect            |                   | Certainty | Importance |
|----------------------|--------------|--------------|---------------|--------------|-------------|----------------------|----------------------------------------------------------------|---------|-------------------|-------------------|-----------|------------|
| № of studies         | Study design | Risk of bias | Inconsistency | Indirectness | Imprecision | Other considerations | <i>L. helveticus</i> Rosell-52 + <i>L. rhamnosus</i> Rosell-11 | placebo | Relative (95% CI) | Absolute (95% CI) |           |            |

#### Hospitalization

|   |                   |             |             |             |                      |      |               |               |                               |                                                    |               |          |
|---|-------------------|-------------|-------------|-------------|----------------------|------|---------------|---------------|-------------------------------|----------------------------------------------------|---------------|----------|
| 2 | randomised trials | not serious | not serious | not serious | serious <sup>a</sup> | none | 34/475 (7.2%) | 22/475 (4.6%) | <b>RR 1.52</b> (0.91 to 2.55) | <b>24 more per 1,000</b> (from 4 fewer to 72 more) | ⊕⊕⊕○ MODERATE | CRITICAL |
|---|-------------------|-------------|-------------|-------------|----------------------|------|---------------|---------------|-------------------------------|----------------------------------------------------|---------------|----------|

#### Adverse Events

|   |                   |             |             |             |                      |      |                 |                 |                               |                                                      |               |          |
|---|-------------------|-------------|-------------|-------------|----------------------|------|-----------------|-----------------|-------------------------------|------------------------------------------------------|---------------|----------|
| 2 | randomised trials | not serious | not serious | not serious | serious <sup>a</sup> | none | 140/475 (29.5%) | 164/475 (34.5%) | <b>RR 0.85</b> (0.71 to 1.02) | <b>52 fewer per 1,000</b> (from 100 fewer to 7 more) | ⊕⊕⊕○ MODERATE | CRITICAL |
|---|-------------------|-------------|-------------|-------------|----------------------|------|-----------------|-----------------|-------------------------------|------------------------------------------------------|---------------|----------|

#### Duration of Diarrhea

| Certainty assessment |                   |                      |               |              |                      |                      | № of patients                                                  |         | Effect            |                                             | Certainty   | Importance |
|----------------------|-------------------|----------------------|---------------|--------------|----------------------|----------------------|----------------------------------------------------------------|---------|-------------------|---------------------------------------------|-------------|------------|
| № of studies         | Study design      | Risk of bias         | Inconsistency | Indirectness | Imprecision          | Other considerations | <i>L. helveticus</i> Rosell-52 + <i>L. rhamnosus</i> Rosell-11 | placebo | Relative (95% CI) | Absolute (95% CI)                           |             |            |
| 3                    | randomised trials | serious <sup>b</sup> | not serious   | not serious  | serious <sup>a</sup> | none                 | 531                                                            | 531     | -                 | mean 1.72 lower (9.27 lower to 5.83 higher) | ⊕⊕○○<br>LOW | CRITICAL   |

CI: Confidence interval; RR: Risk ratio

### Explanations

a. The 95% CI includes the potential for both benefit and harm. The 95% CI includes the potential for both benefit and harm.

b. Unclear risk of performance, detection, and reporting bias in Hegar 2015

Hospitalization:

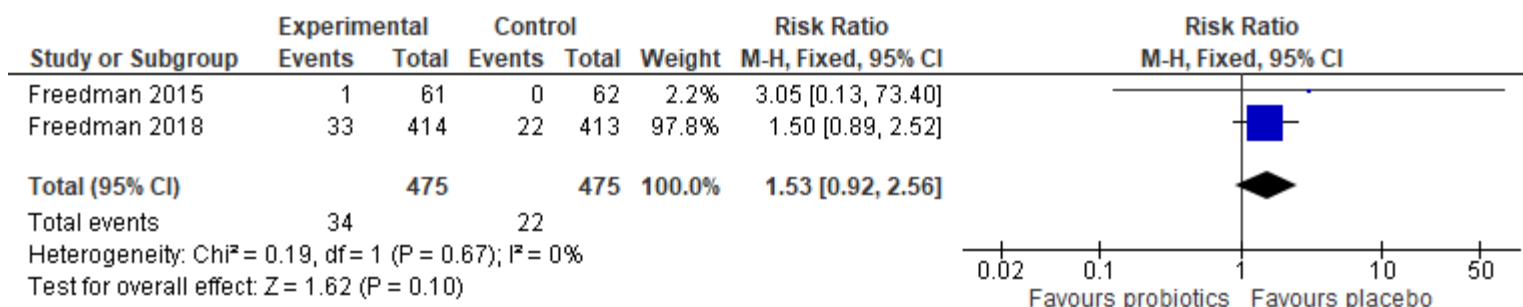

Adverse Events:

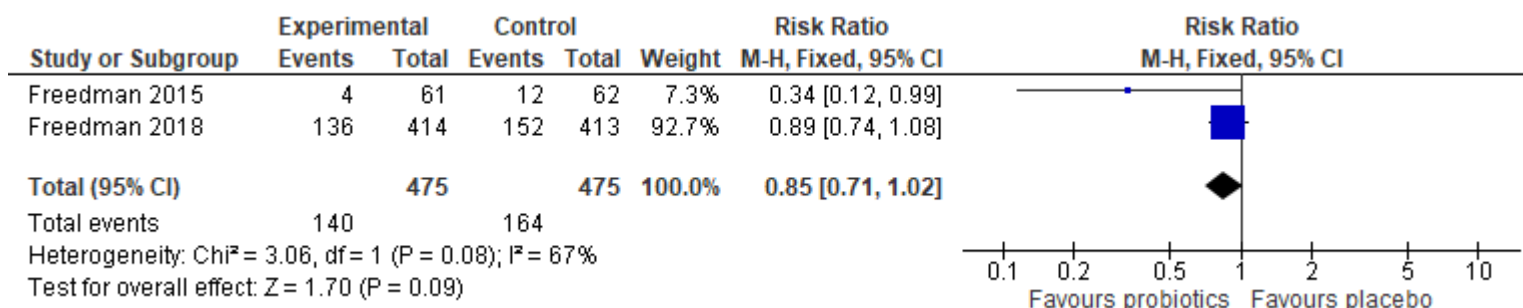

Mean Duration of Diarrhea:

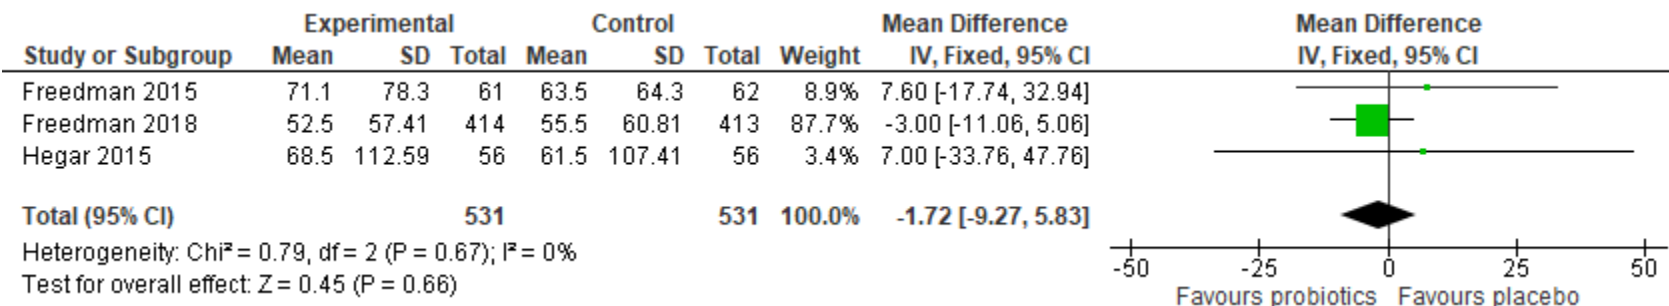

Question: *Bifidobacterium animalis* subsp. *lactis* compared to placebo for treatment of acute infectious diarrhea in children (7g)

Bibliography: El-Soud 2015, Erdogan 2012, Mao 2008

| Certainty assessment |              |              |               |              |             |                      | No of patients                          |         | Effect            |                   | Certainty | Importance |
|----------------------|--------------|--------------|---------------|--------------|-------------|----------------------|-----------------------------------------|---------|-------------------|-------------------|-----------|------------|
| No of studies        | Study design | Risk of bias | Inconsistency | Indirectness | Imprecision | Other considerations | <i>B. animalis</i> subsp. <i>lactis</i> | placebo | Relative (95% CI) | Absolute (95% CI) |           |            |

**Mean Duration of Diarrhea**

|   |                   |                           |                      |             |                      |      |     |     |   |                                            |                  |          |
|---|-------------------|---------------------------|----------------------|-------------|----------------------|------|-----|-----|---|--------------------------------------------|------------------|----------|
| 3 | randomised trials | very serious <sup>a</sup> | serious <sup>b</sup> | not serious | serious <sup>c</sup> | none | 120 | 121 | - | mean 1.88 lower (3.68 lower to 0.08 lower) | ⊕○○○<br>VERY LOW | CRITICAL |
|---|-------------------|---------------------------|----------------------|-------------|----------------------|------|-----|-----|---|--------------------------------------------|------------------|----------|

CI: Confidence interval

**Explanations**

- a. Erdogan has high risk of performance bias and all studies have uncertain risk of selection, detection, and reporting bias
- b. Heterogeneity among studies (I2 94%)
- c. Few events reported do not meet the optimal information size and suggest fragility in the estimate.

Mean Duration of Diarrhea:

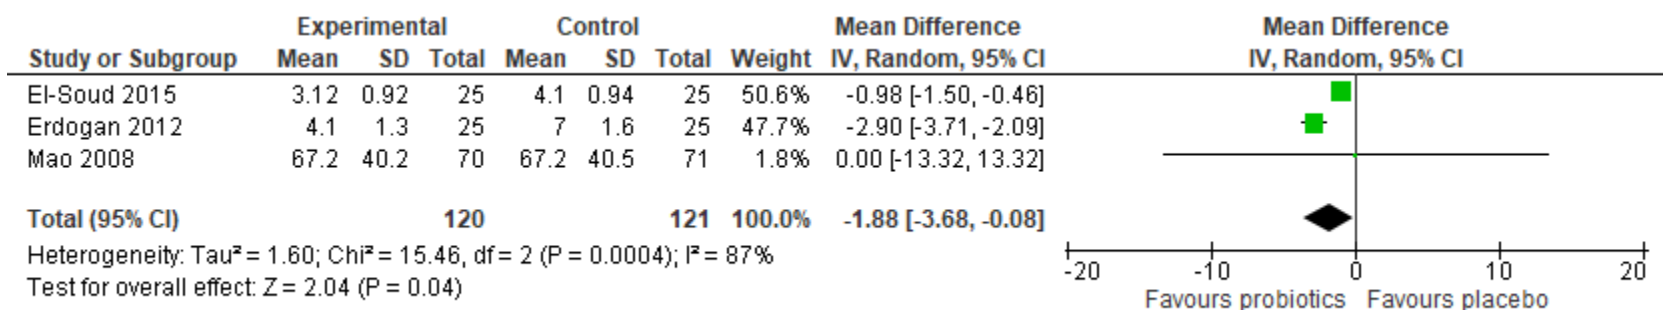



**Question:** *Streptococcus salivarius* subsp. *thermophilus* + *Lactobacillus delbrueckii* subsp. *bulgaricus* compared to placebo and/or standard care in patients with signs and/or symptoms suggestive of acute infectious gastroenteritis (7h)

**Bibliography:** Bhatnagar 1998, Boudraa 2001

| Certainty assessment |              |              |               |              |             |                      | No of patients                                                                                   |         | Effect            |                   | Certainty | Importance |
|----------------------|--------------|--------------|---------------|--------------|-------------|----------------------|--------------------------------------------------------------------------------------------------|---------|-------------------|-------------------|-----------|------------|
| No of studies        | Study design | Risk of bias | Inconsistency | Indirectness | Imprecision | Other considerations | <i>S. salivarius</i> subsp. <i>thermophilus</i> + <i>L. delbrueckii</i> subsp. <i>bulgaricus</i> | placebo | Relative (95% CI) | Absolute (95% CI) |           |            |

**Diarrhea > 4 days**

|   |                   |                           |             |             |                      |      |                |                |                               |                                                       |                                                                                                 |          |
|---|-------------------|---------------------------|-------------|-------------|----------------------|------|----------------|----------------|-------------------------------|-------------------------------------------------------|-------------------------------------------------------------------------------------------------|----------|
| 2 | randomised trials | very serious <sup>a</sup> | not serious | not serious | serious <sup>b</sup> | none | 23/103 (22.3%) | 29/105 (27.6%) | <b>RR 0.82</b> (0.51 to 1.30) | <b>50 fewer per 1,000</b> (from 135 fewer to 83 more) | 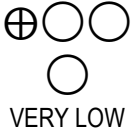<br>VERY LOW | CRITICAL |
|---|-------------------|---------------------------|-------------|-------------|----------------------|------|----------------|----------------|-------------------------------|-------------------------------------------------------|-------------------------------------------------------------------------------------------------|----------|

**Mean Duration of Diarrhea**

|   |                   |                           |             |             |                      |      |    |    |   |                                                    |                                                                                                   |          |
|---|-------------------|---------------------------|-------------|-------------|----------------------|------|----|----|---|----------------------------------------------------|---------------------------------------------------------------------------------------------------|----------|
| 1 | randomised trials | very serious <sup>a</sup> | not serious | not serious | serious <sup>c</sup> | none | 56 | 61 | - | mean <b>17.6 lower</b> (30.16 lower to 5.04 lower) | 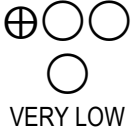<br>VERY LOW | CRITICAL |
|---|-------------------|---------------------------|-------------|-------------|----------------------|------|----|----|---|----------------------------------------------------|---------------------------------------------------------------------------------------------------|----------|

**CI:** Confidence interval; **RR:** Risk ratio

**Explanations**

- a. High risk of detection and attrition bias in one study
- b. Low event rate
- c. The 95% CI includes the potential for both benefit and harm. Few events reported do not meet the optimal information size and suggest fragility in the estimate.

Diarrhea > 4days

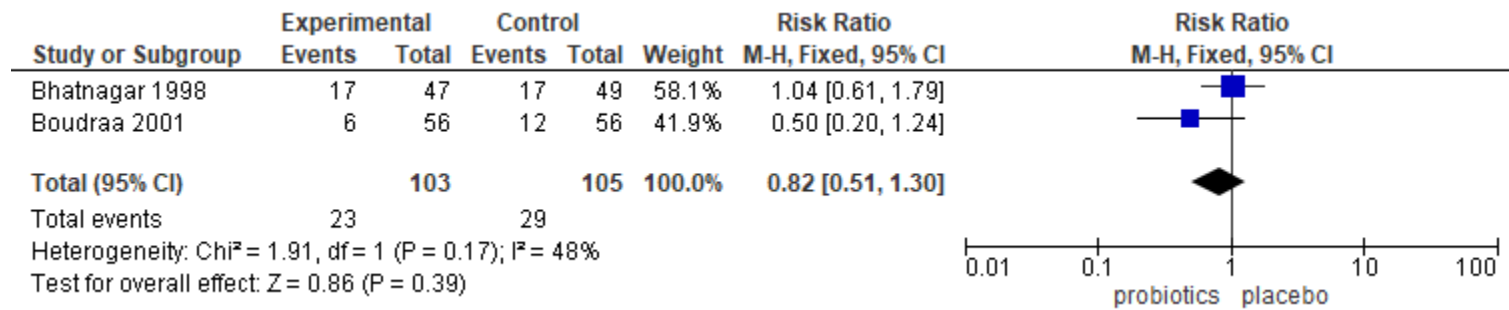

Mean duration of diarrhea (hours)

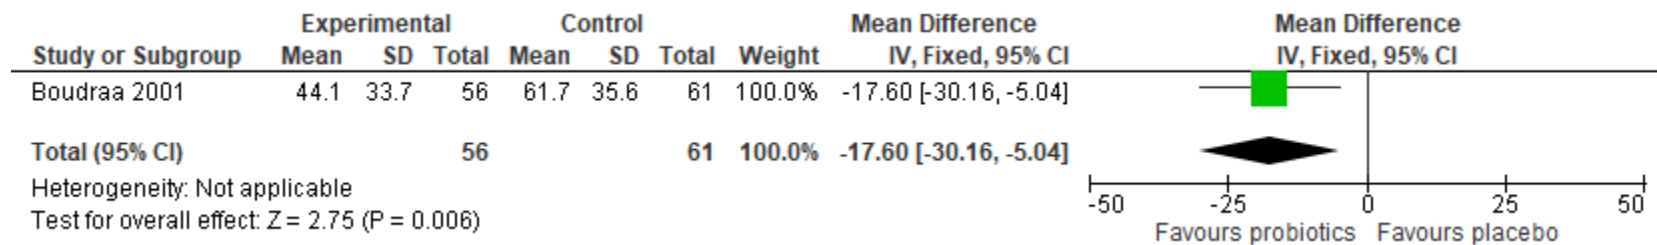

**Question:** *Enterococcus faecium* SF68 compared to placebo and/or standard care in patients with signs and/or symptoms suggestive of acute infectious gastroenteritis (7i)

**Bibliography:** D'Apuzzo 1982

| Certainty assessment |              |              |               |              |             |                      | No of patients         |         | Effect            |                   | Certainty | Importance |
|----------------------|--------------|--------------|---------------|--------------|-------------|----------------------|------------------------|---------|-------------------|-------------------|-----------|------------|
| No of studies        | Study design | Risk of bias | Inconsistency | Indirectness | Imprecision | Other considerations | <i>E. faecium</i> SF68 | placebo | Relative (95% CI) | Absolute (95% CI) |           |            |

Diarrhea > 4days

|   |                   |                      |             |             |                      |      |              |              |                           |                                                    |             |          |
|---|-------------------|----------------------|-------------|-------------|----------------------|------|--------------|--------------|---------------------------|----------------------------------------------------|-------------|----------|
| 1 | randomised trials | serious <sup>a</sup> | not serious | not serious | serious <sup>b</sup> | none | 3/21 (14.3%) | 7/18 (38.9%) | RR 0.37<br>(0.11 to 1.22) | 245 fewer per 1,000<br>(from 346 fewer to 86 more) | ⊕⊕○○<br>LOW | CRITICAL |
|---|-------------------|----------------------|-------------|-------------|----------------------|------|--------------|--------------|---------------------------|----------------------------------------------------|-------------|----------|

CI: Confidence interval; RR: Risk ratio

### Explanations

- a. Unclear risk of selection and detection bias
- b. Few events reported do not meet the optimal information size and suggest fragility in the estimate.

Diarrhea > 4 days

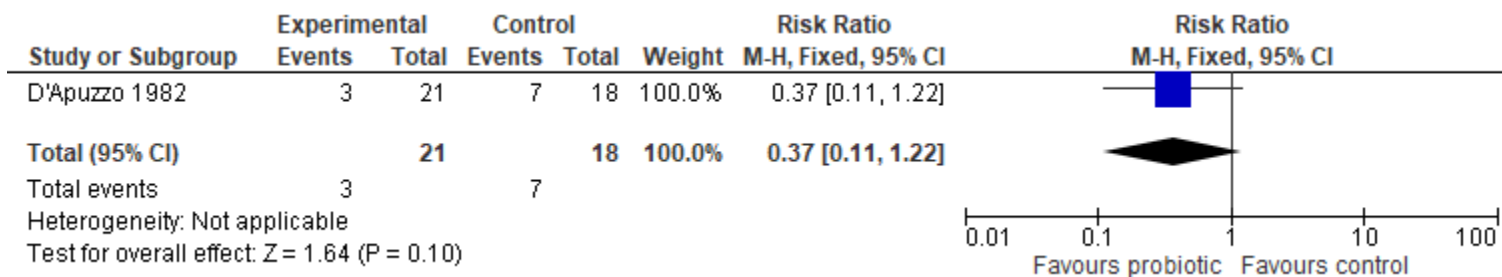



**Question:** *Escherichia coli* Nissle 1917 compared to placebo and/or standard care in patients with signs and/or symptoms suggestive of acute infectious gastroenteritis (7j)

**Bibliography:** Henker 2007a, Henker 2008

| Certainty assessment             |                   |                           |               |              |             |                      | No of patients             |         | Effect            |                                                        | Certainty   | Importance |
|----------------------------------|-------------------|---------------------------|---------------|--------------|-------------|----------------------|----------------------------|---------|-------------------|--------------------------------------------------------|-------------|------------|
| No of studies                    | Study design      | Risk of bias              | Inconsistency | Indirectness | Imprecision | Other considerations | <i>E. coli</i> Nissle 1917 | placebo | Relative (95% CI) | Absolute (95% CI)                                      |             |            |
| <b>Mean Duration of Diarrhea</b> |                   |                           |               |              |             |                      |                            |         |                   |                                                        |             |            |
| 2                                | randomised trials | very serious <sup>a</sup> | not serious   | not serious  | not serious | none                 | 129                        | 121     | -                 | mean 59.34<br>lower (63.89<br>lower to 54.79<br>lower) | ⊕⊕○○<br>LOW | CRITICAL   |

CI: Confidence interval

### Explanations

a. High risk of attrition bias

Mean duration of diarrhea (hours)

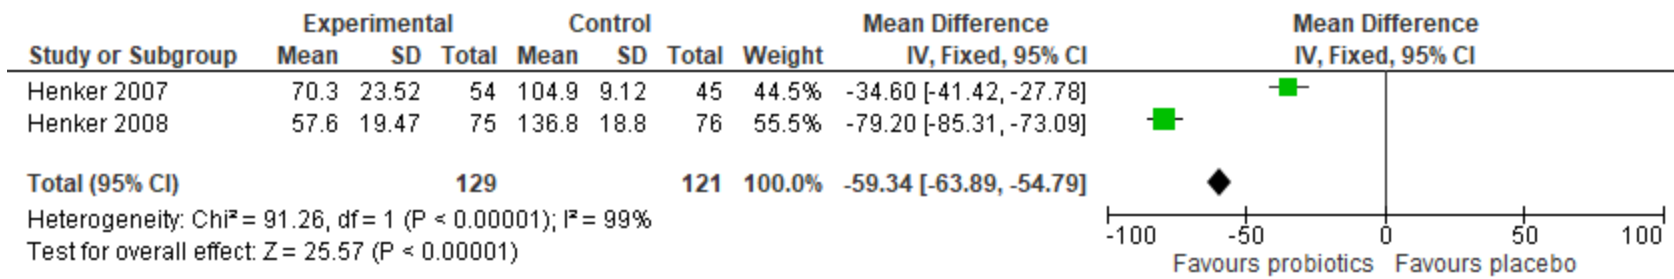

**Question:** *Bacillus mesentericus* + *Clostridium butyricum* + *Enterococcus faecalis* compared to placebo/standard of care for treatment of acute infectious diarrhea in children (7k)

**Bibliography:** Chen 2010, Huang 2014

| Certainty assessment |              |              |               |              |             |                      | № of patients                                                     |                          | Effect            |                   | Certainty | Importance |
|----------------------|--------------|--------------|---------------|--------------|-------------|----------------------|-------------------------------------------------------------------|--------------------------|-------------------|-------------------|-----------|------------|
| № of studies         | Study design | Risk of bias | Inconsistency | Indirectness | Imprecision | Other considerations | <i>B. mesentericus</i> + <i>C. butyricum</i> + <i>E. faecalis</i> | placebo/standard of care | Relative (95% CI) | Absolute (95% CI) |           |            |

**Mean Stool Frequency Day 3**

|   |                   |                      |                      |             |                          |      |     |     |   |                                            |             |          |
|---|-------------------|----------------------|----------------------|-------------|--------------------------|------|-----|-----|---|--------------------------------------------|-------------|----------|
| 2 | randomised trials | serious <sup>a</sup> | serious <sup>b</sup> | not serious | not serious <sup>c</sup> | none | 232 | 220 | - | mean 1.46 lower (1.82 lower to 1.1 higher) | ⊕⊕○○<br>LOW | CRITICAL |
|---|-------------------|----------------------|----------------------|-------------|--------------------------|------|-----|-----|---|--------------------------------------------|-------------|----------|

**Length of Stay**

|   |                   |                      |                      |             |                          |      |     |     |   |                                                 |             |          |
|---|-------------------|----------------------|----------------------|-------------|--------------------------|------|-----|-----|---|-------------------------------------------------|-------------|----------|
| 2 | randomised trials | serious <sup>a</sup> | serious <sup>b</sup> | not serious | not serious <sup>c</sup> | none | 232 | 220 | - | mean 0.94 days fewer (1.27 fewer to 0.61 fewer) | ⊕⊕○○<br>LOW | CRITICAL |
|---|-------------------|----------------------|----------------------|-------------|--------------------------|------|-----|-----|---|-------------------------------------------------|-------------|----------|

**CI:** Confidence interval

**Explanations**

- a. Unclear risk of selection and reporting bias and high risk of bias in Huang 2014 for performance, detection, and attrition bias
- b. High heterogeneity ( $I^2 > 90\%$ ) and opposite direction of effect

c. OIS is met for continuous outcomes (>400).

Mean Stool Frequency Day 3:

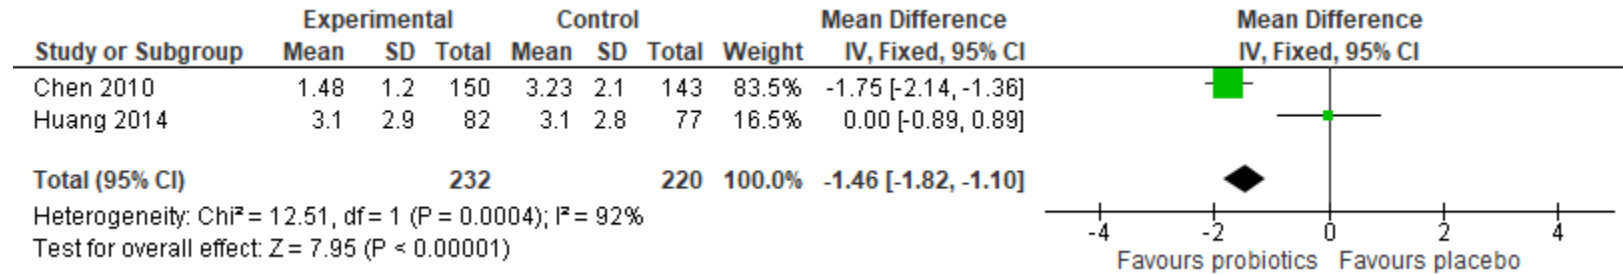

Length of Stay (days)

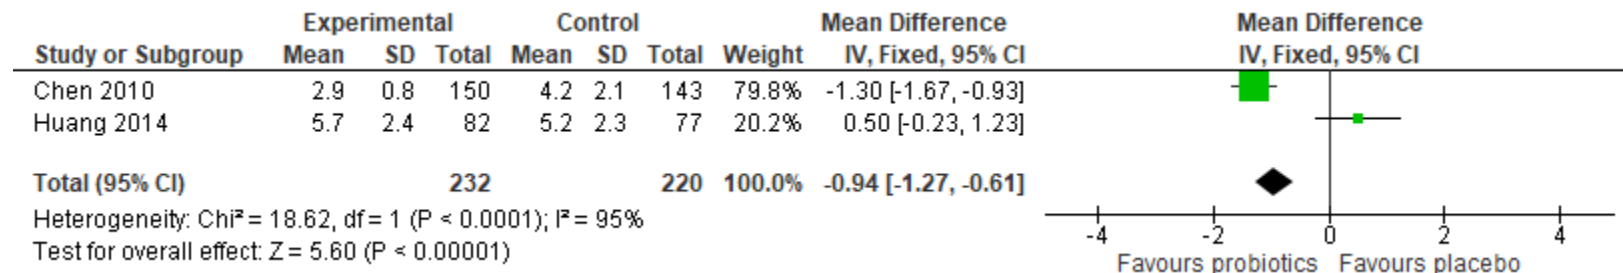



**Question:** *Lactobacillus acidophilus* + *Lactobacillus rhamnosus* + *Bifidobacterium longum* subsp. *longum* + *Saccharomyces boulardii* compared to placebo for treatment of acute infectious diarrhea (71)

**Bibliography:** Grandy 2010, Teran 2009

| Certainty assessment |              |              |               |              |             |                      | № of patients                                                                                             |         | Effect            |                   | Certainty | Importance |
|----------------------|--------------|--------------|---------------|--------------|-------------|----------------------|-----------------------------------------------------------------------------------------------------------|---------|-------------------|-------------------|-----------|------------|
| № of studies         | Study design | Risk of bias | Inconsistency | Indirectness | Imprecision | Other considerations | <i>L. acidophilus</i> + <i>L. rhamnosus</i> + <i>B. longum</i> subsp. <i>longum</i> + <i>S. boulardii</i> | placebo | Relative (95% CI) | Absolute (95% CI) |           |            |

**Mean Duration of Diarrhea (measured in hours)**

|   |                   |                      |             |             |                           |      |    |    |   |                                                      |                  |          |
|---|-------------------|----------------------|-------------|-------------|---------------------------|------|----|----|---|------------------------------------------------------|------------------|----------|
| 2 | randomised trials | serious <sup>a</sup> | not serious | not serious | very serious <sup>b</sup> | none | 68 | 46 | - | 17.93 hours fewer (from 31.90 fewer to 3.95 greater) | ⊕○○○<br>VERY LOW | CRITICAL |
|---|-------------------|----------------------|-------------|-------------|---------------------------|------|----|----|---|------------------------------------------------------|------------------|----------|

CI: Confidence interval

**Explanations**

- a. Unclear risk of selection and performance bias
- b. The 95% CI includes the potential for both benefit and harm. Few events reported do not meet the optimal information size and suggest fragility in the estimate. Mean duration of diarrhea (hours)

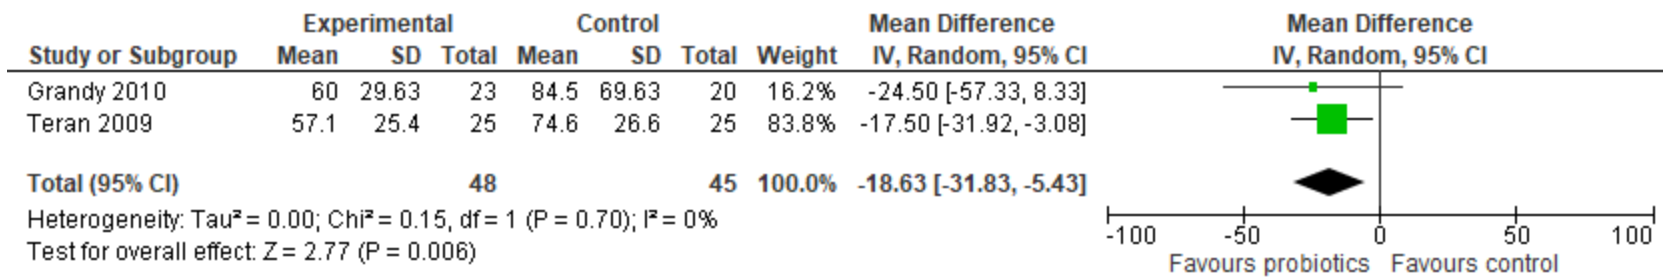

**Question:** *Lactobacillus rhamnosus* 19070-2 + *Lactobacillus reuteri* DSM 12246 compared to placebo and/or standard care in patients with signs and/or symptoms suggestive of acute infectious gastroenteritis (7m)

**Bibliography:** Rosenfeldt 2002, Rosenfeld 2002a

| Certainty assessment |              |              |               |              |             |                      | No of patients                                            |         | Effect            |                   | Certainty | Importance |
|----------------------|--------------|--------------|---------------|--------------|-------------|----------------------|-----------------------------------------------------------|---------|-------------------|-------------------|-----------|------------|
| No of studies        | Study design | Risk of bias | Inconsistency | Indirectness | Imprecision | Other considerations | <i>L. rhamnosus</i> 19070-2 + <i>L. reuteri</i> DSM 12246 | placebo | Relative (95% CI) | Absolute (95% CI) |           |            |

**Mean Duration of Diarrhea (hours)**

|   |                   |                           |             |             |                      |      |    |    |   |                                                   |                  |          |
|---|-------------------|---------------------------|-------------|-------------|----------------------|------|----|----|---|---------------------------------------------------|------------------|----------|
| 2 | randomised trials | very serious <sup>a</sup> | not serious | not serious | serious <sup>b</sup> | none | 54 | 58 | - | mean 23.43<br>lower (41.47<br>lower to 5.4 lower) | ⊕○○○<br>VERY LOW | CRITICAL |
|---|-------------------|---------------------------|-------------|-------------|----------------------|------|----|----|---|---------------------------------------------------|------------------|----------|

CI: Confidence interval

### Explanations

a. High risk of attrition bias in both studies

b. Few events reported do not meet the optimal information size and suggest fragility in the estimate. The 95% CI includes the potential for both benefit and harm.

**Mean duration of diarrhea (hours)**

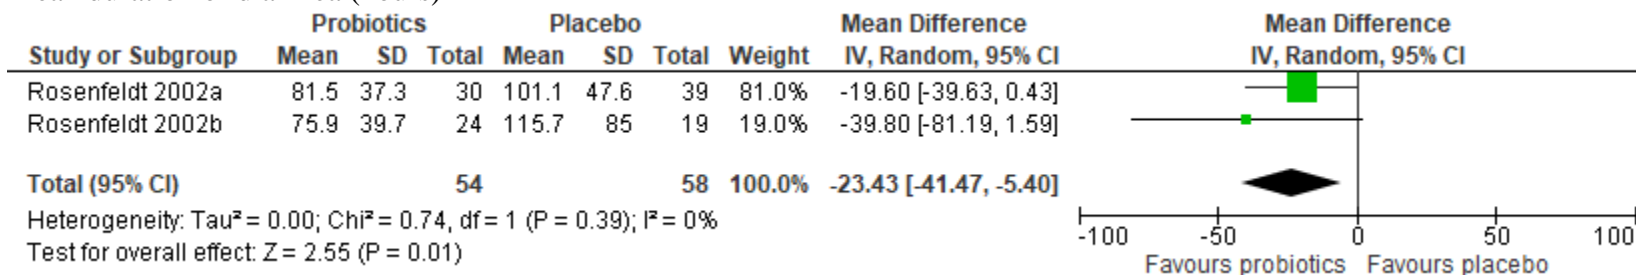

**Question:** *Lactobacillus casei* Shirota compared to placebo and/or standard care in patients with signs and/or symptoms suggestive of acute infectious gastroenteritis (7n)

**Bibliography:** Sugita 1994

| Certainty assessment                     |                   |                           |               |              |                      |                      | No of patients          |         | Effect            |                                           | Certainty        | Importance |
|------------------------------------------|-------------------|---------------------------|---------------|--------------|----------------------|----------------------|-------------------------|---------|-------------------|-------------------------------------------|------------------|------------|
| No of studies                            | Study design      | Risk of bias              | Inconsistency | Indirectness | Imprecision          | Other considerations | <i>L. casei</i> Shirota | placebo | Relative (95% CI) | Absolute (95% CI)                         |                  |            |
| <b>Mean duration of diarrhea (hours)</b> |                   |                           |               |              |                      |                      |                         |         |                   |                                           |                  |            |
| 1                                        | randomised trials | very serious <sup>a</sup> | not serious   | not serious  | serious <sup>b</sup> | none                 | 16                      | 11      | -                 | mean 36 lower (65.87 lower to 6.13 lower) | ⊕○○○<br>VERY LOW | CRITICAL   |

CI: Confidence interval

**Explanations**

a. High risk of bias in all domains

b. Few events reported do not meet the optimal information size and suggest fragility in the estimate. The 95% CI includes the potential for both benefit and harm.

Mean duration of diarrhea (hours)

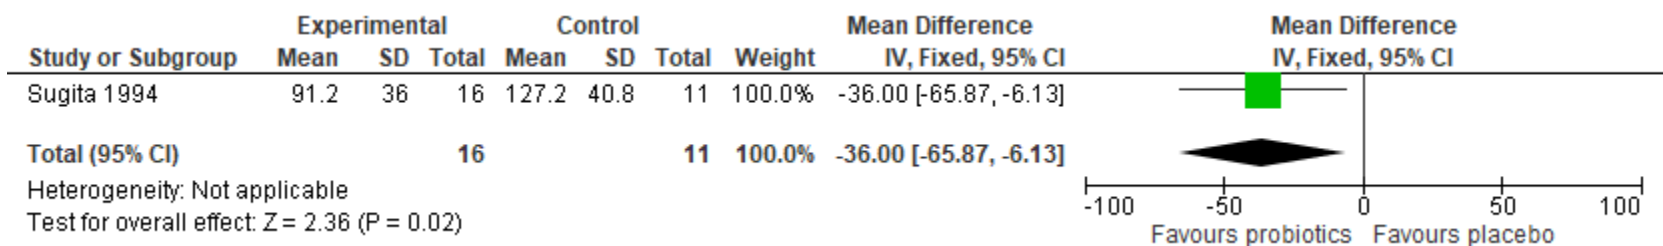

**Question:** *Lactobacillus paracasei* subsp. *paracasei* + *Lactobacillus plantarum* + *Lactobacillus acidophilus* + *Lactobacillus delbrueckii* subsp. *bulgaricus* + *Bifidobacterium longum* subsp. *longum* + *Bifidobacterium breve* + *B. longum* subsp. *infantis* + *Streptococcus salivarius* subsp. *thermophilus* compared to placebo and/or standard care in patients with signs and/or symptoms suggestive of acute infectious gastroenteritis (7o)

**Bibliography:** Dubey 2008

| Certainty assessment |              |              |               |              |             |                      | No of patients                                                                                                                                                                                                                                                                                   |         | Effect            |                   | Certainty | Importance |
|----------------------|--------------|--------------|---------------|--------------|-------------|----------------------|--------------------------------------------------------------------------------------------------------------------------------------------------------------------------------------------------------------------------------------------------------------------------------------------------|---------|-------------------|-------------------|-----------|------------|
| No of studies        | Study design | Risk of bias | Inconsistency | Indirectness | Imprecision | Other considerations |                                                                                                                                                                                                                                                                                                  | placebo | Relative (95% CI) | Absolute (95% CI) |           |            |
|                      |              |              |               |              |             |                      | <i>L. paracasei</i> subsp. <i>paracasei</i> + <i>L. plantarum</i> + <i>L. acidophilus</i> + <i>L. delbrueckii</i> subsp. <i>bulgaricus</i> + <i>B. longum</i> subsp. <i>longum</i> + <i>B. breve</i> + <i>B. longum</i> subsp. <i>infantis</i> + <i>S. salivarius</i> subsp. <i>thermophilus</i> |         |                   |                   |           |            |

Diarrhea > 4 days

|   |                   |                      |             |                      |             |      |                |                |                                  |                                                             |                    |          |
|---|-------------------|----------------------|-------------|----------------------|-------------|------|----------------|----------------|----------------------------------|-------------------------------------------------------------|--------------------|----------|
| 1 | randomised trials | serious <sup>a</sup> | not serious | serious <sup>b</sup> | not serious | none | 12/113 (10.6%) | 67/111 (60.4%) | <b>RR 0.18</b><br>(0.10 to 0.31) | <b>495 fewer per 1,000</b><br>(from 543 fewer to 416 fewer) | ⊕⊕○○<br><b>LOW</b> | CRITICAL |
|---|-------------------|----------------------|-------------|----------------------|-------------|------|----------------|----------------|----------------------------------|-------------------------------------------------------------|--------------------|----------|

CI: Confidence interval; RR: Risk ratio

## Explanations

- Unclear risk of selection bias
- Lack of standardized formula

Diarrhea > 4 days

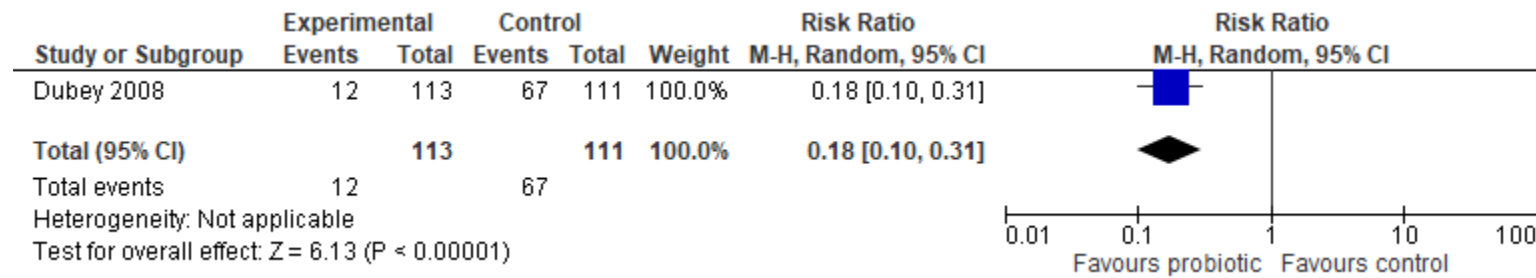

**Question:** *Enterococcus faecalis* + *Clostridium butyricum* + *Bacillus mesentericus* + *Bacillus coagulans* compared to placebo and/or standard care in patients with signs and/or symptoms suggestive of acute infectious gastroenteritis (7p)

**Bibliography:** Narayanappa 2008

| Certainty assessment |              |              |               |              |             |                      | № of patients                                                                                    |         | Effect            |                   | Certainty | Importance |
|----------------------|--------------|--------------|---------------|--------------|-------------|----------------------|--------------------------------------------------------------------------------------------------|---------|-------------------|-------------------|-----------|------------|
| № of studies         | Study design | Risk of bias | Inconsistency | Indirectness | Imprecision | Other considerations | <i>E. faecalis</i> +<br><i>C. butyricum</i> +<br><i>B. mesentericus</i> +<br><i>B. coagulans</i> | placebo | Relative (95% CI) | Absolute (95% CI) |           |            |

**Mean Duration of Diarrhea**

|   |                   |                      |             |             |                      |      |    |    |   |                                              |             |          |
|---|-------------------|----------------------|-------------|-------------|----------------------|------|----|----|---|----------------------------------------------|-------------|----------|
| 1 | randomised trials | serious <sup>a</sup> | not serious | not serious | serious <sup>b</sup> | none | 40 | 40 | - | mean 26.4 lower (42.07 lower to 10.73 lower) | ⊕⊕○○<br>LOW | CRITICAL |
|---|-------------------|----------------------|-------------|-------------|----------------------|------|----|----|---|----------------------------------------------|-------------|----------|

CI: Confidence interval

**Explanations**

a. Unclear risk of selection and detection bias

b. Few events reported do not meet the optimal information size and suggest fragility in the estimate. The 95% CI includes the potential for both benefit and harm.

Mean duration of diarrhea (hours)

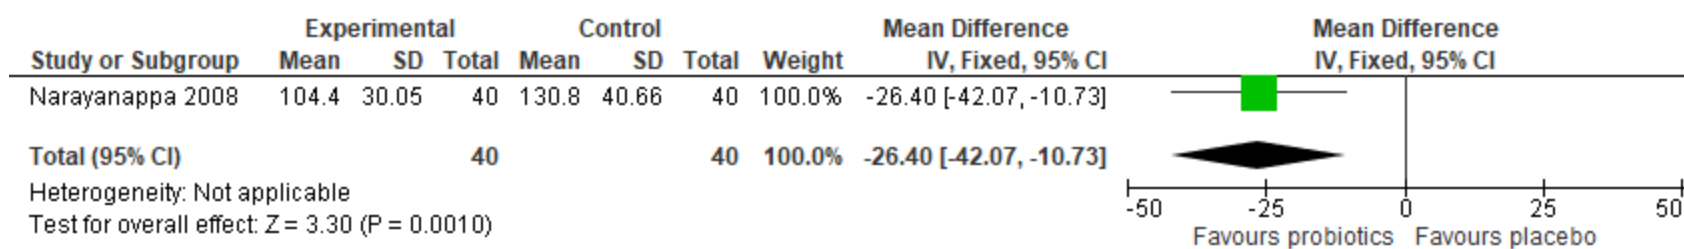



**Question:** *Bifidobacterium longum* subsp. *longum* + *Bifidobacterium animalis* subsp. *lactis* + *Lactobacillus acidophilus* + *Lactobacillus rhamnosus* + *Lactobacillus plantarum* + *Pediococcus pentosaceus* compared to placebo for the treatment of acute infectious diarrhea in children (7q)

**Bibliography:** Lee 2015

| Certainty assessment |              |              |               |              |             |                      | № of patients                                                                                                                                                               |         | Effect            |                   | Certainty | Importance |
|----------------------|--------------|--------------|---------------|--------------|-------------|----------------------|-----------------------------------------------------------------------------------------------------------------------------------------------------------------------------|---------|-------------------|-------------------|-----------|------------|
| № of studies         | Study design | Risk of bias | Inconsistency | Indirectness | Imprecision | Other considerations | <i>B. longum</i> subsp. <i>longum</i> + <i>B. animalis</i> subsp. <i>lactis</i> + <i>L. acidophilus</i> + <i>L. rhamnosus</i> + <i>L. plantarum</i> + <i>P. pentosaceus</i> | placebo | Relative (95% CI) | Absolute (95% CI) |           |            |

**Mean Duration of Diarrhea**

|   |                   |                      |             |             |                           |      |    |    |   |                                              |                  |          |
|---|-------------------|----------------------|-------------|-------------|---------------------------|------|----|----|---|----------------------------------------------|------------------|----------|
| 1 | randomised trials | serious <sup>a</sup> | not serious | not serious | very serious <sup>b</sup> | none | 13 | 16 | - | MD 1.1 days lower (2.07 lower to 0.13 lower) | ⊕○○○<br>VERY LOW | CRITICAL |
|---|-------------------|----------------------|-------------|-------------|---------------------------|------|----|----|---|----------------------------------------------|------------------|----------|

**CI:** Confidence interval

**Explanations**

- a. Unclear risk of selection bias, performance bias, detection bias, and reporting bias
- b. Few events reported do not meet the optimal information size and suggest fragility in the estimate.

Mean Duration of Diarrhea (Days)

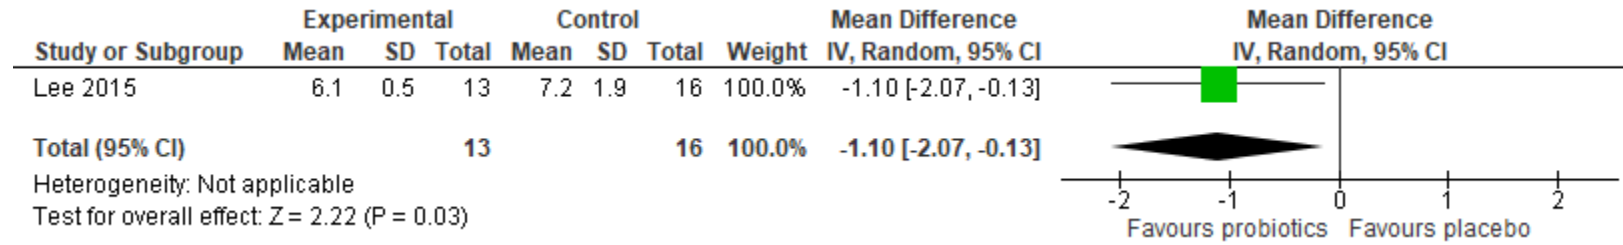

**Question:** *Lactobacillus paracasei* subsp. *paracasei* ST11 compared to placebo and/or standard care in patients with signs and/or symptoms suggestive of acute infectious gastroenteritis (7t)

**Bibliography:** Sarkar 2005

| Certainty assessment |              |              |               |              |             |                      | No of patients                                   |         | Effect            |                   | Certainty | Importance |
|----------------------|--------------|--------------|---------------|--------------|-------------|----------------------|--------------------------------------------------|---------|-------------------|-------------------|-----------|------------|
| No of studies        | Study design | Risk of bias | Inconsistency | Indirectness | Imprecision | Other considerations | <i>L. paracasei</i> subsp. <i>paracasei</i> ST11 | placebo | Relative (95% CI) | Absolute (95% CI) |           |            |

**Mean Duration of Diarrhea**

|   |                   |             |             |             |                             |      |     |     |   |                                             |             |          |
|---|-------------------|-------------|-------------|-------------|-----------------------------|------|-----|-----|---|---------------------------------------------|-------------|----------|
| 1 | randomised trials | not serious | not serious | not serious | Very serious <sup>a,b</sup> | none | 115 | 115 | - | mean 3.8 lower (15.21 lower to 7.61 higher) | ⊕⊕○○<br>LOW | CRITICAL |
|---|-------------------|-------------|-------------|-------------|-----------------------------|------|-----|-----|---|---------------------------------------------|-------------|----------|

CI: Confidence interval

**Explanations**

- a. The 95% CI includes the potential for both benefit and harm.
- b. Few events reported do not meet the optimal information size and suggest fragility in the estimate.

**Mean duration of diarrhea (hours)**

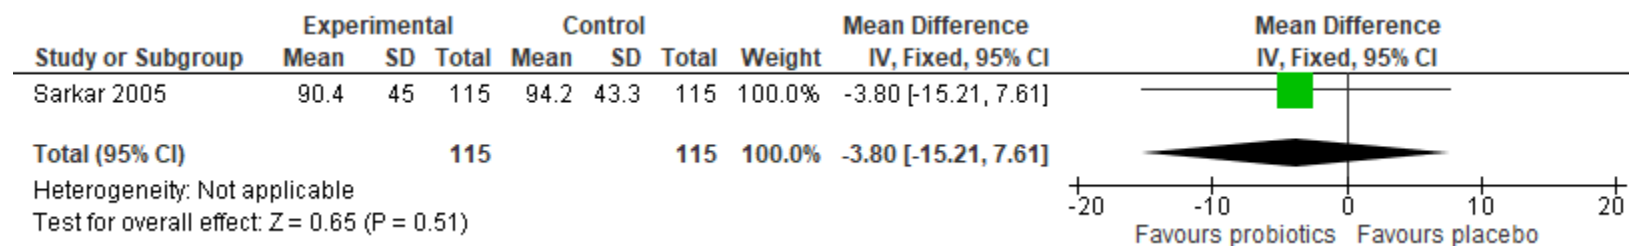

**Question:** *Lactobacillus acidophilus* + *Bifidobacterium bifidum* + *Lactobacillus delbrueckii* subsp. *bulgaricus* compared to placebo and/or standard care in patients with signs and/or symptoms suggestive of acute infectious gastroenteritis (7u)

**Bibliography:** Kowalska-Duplaga 2004

| Certainty assessment                     |                   |                           |               |              |                      |                      | № of patients                                                                              |         | Effect            |                                           | Certainty        | Importance |
|------------------------------------------|-------------------|---------------------------|---------------|--------------|----------------------|----------------------|--------------------------------------------------------------------------------------------|---------|-------------------|-------------------------------------------|------------------|------------|
| № of studies                             | Study design      | Risk of bias              | Inconsistency | Indirectness | Imprecision          | Other considerations | <i>L. acidophilus</i> + <i>B. bifidum</i> + <i>L. delbrueckii</i> subsp. <i>bulgaricus</i> | placebo | Relative (95% CI) | Absolute (95% CI)                         |                  |            |
| <b>Mean duration of diarrhea (hours)</b> |                   |                           |               |              |                      |                      |                                                                                            |         |                   |                                           |                  |            |
| 1                                        | randomised trials | very serious <sup>a</sup> | not serious   | not serious  | serious <sup>b</sup> | none                 | 86                                                                                         | 87      | -                 | mean 7 lower (16.55 lower to 2.55 higher) | ⊕○○○<br>VERY LOW | CRITICAL   |

CI: Confidence interval

### Explanations

- a. High risk of selection bias
- b. The 95% CI includes the potential for both benefit and harm.

Mean duration of diarrhea (hours)

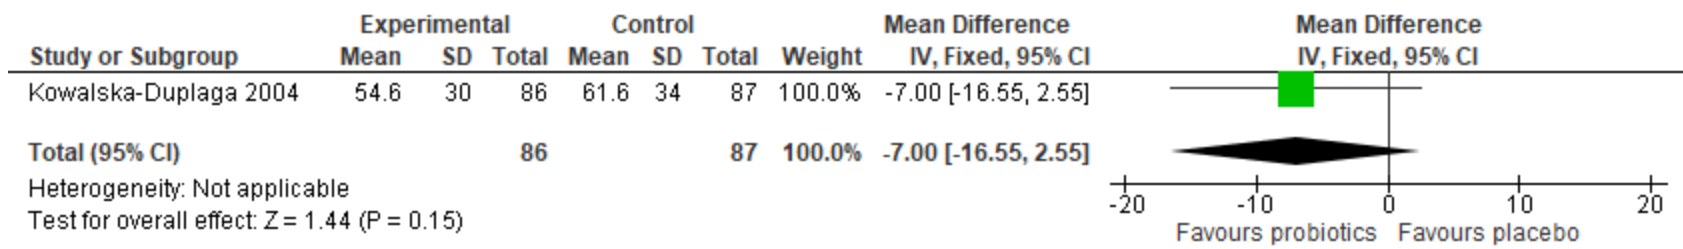

**Question:** *Bifidobacterium ruminatum* compared to placebo and/or standard care in patients with signs and/or symptoms suggestive of acute infectious gastroenteritis (7v)

**Bibliography:** : Kowalska-Duplaga 1999

| Certainty assessment |              |              |               |              |             |                      | № of patients       |         | Effect            |                   | Certainty | Importance |
|----------------------|--------------|--------------|---------------|--------------|-------------|----------------------|---------------------|---------|-------------------|-------------------|-----------|------------|
| № of studies         | Study design | Risk of bias | Inconsistency | Indirectness | Imprecision | Other considerations | <i>B. ruminatum</i> | placebo | Relative (95% CI) | Absolute (95% CI) |           |            |

**Diarrhea > 4 days**

|   |                   |                      |             |             |                      |      |               |              |                                  |                                                          |             |          |
|---|-------------------|----------------------|-------------|-------------|----------------------|------|---------------|--------------|----------------------------------|----------------------------------------------------------|-------------|----------|
| 1 | randomised trials | serious <sup>a</sup> | not serious | not serious | serious <sup>b</sup> | none | 13/33 (39.4%) | 9/30 (30.0%) | <b>RR 1.31</b><br>(0.66 to 2.62) | <b>93 more per 1,000</b><br>(from 102 fewer to 486 more) | ⊕⊕○○<br>LOW | CRITICAL |
|---|-------------------|----------------------|-------------|-------------|----------------------|------|---------------|--------------|----------------------------------|----------------------------------------------------------|-------------|----------|

CI: Confidence interval; RR: Risk ratio

### Explanations

- a. Unclear risk of selection bias
- b. Few events reported do not meet the optimal information size and suggest fragility in the estimate.

Duration of Diarrhea > 4 days

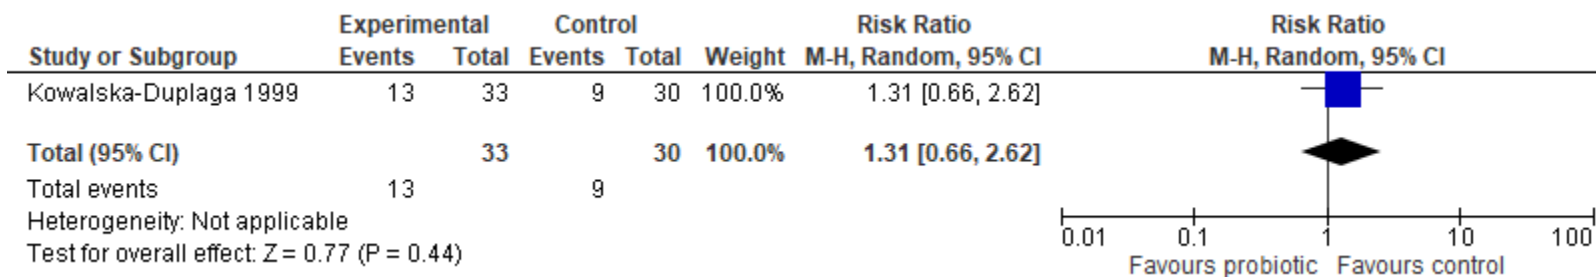

**Question:** *Lactobacillus rhamnosus* 573L/1 and 573L/2 and 573L/3 compared to placebo and/or standard care in patients with signs and/or symptoms suggestive of acute infectious gastroenteritis (7w)

**Bibliography:** Szymanski 2006

| Certainty assessment |              |              |               |              |             |                      | № of patients                                    |         | Effect            |                   | Certainty | Importance |
|----------------------|--------------|--------------|---------------|--------------|-------------|----------------------|--------------------------------------------------|---------|-------------------|-------------------|-----------|------------|
| № of studies         | Study design | Risk of bias | Inconsistency | Indirectness | Imprecision | Other considerations | <i>L. rhamnosus</i> 573L/1 and 573L/2 and 573L/3 | placebo | Relative (95% CI) | Absolute (95% CI) |           |            |

**Mean Duration of Diarrhea**

|   |                   |             |             |             |                             |      |    |    |   |                                                        |             |          |
|---|-------------------|-------------|-------------|-------------|-----------------------------|------|----|----|---|--------------------------------------------------------|-------------|----------|
| 1 | randomised trials | not serious | not serious | not serious | Very serious <sup>a,b</sup> | none | 46 | 41 | - | mean 12.4<br>lower (39.55<br>lower to 14.75<br>higher) | ⊕⊕○○<br>LOW | CRITICAL |
|---|-------------------|-------------|-------------|-------------|-----------------------------|------|----|----|---|--------------------------------------------------------|-------------|----------|

CI: Confidence interval

**Explanations**

- a. The 95% CI includes the potential for both benefit and harm.
- b. Few events reported do not meet the optimal information size and suggest fragility in the estimate.

Mean duration of diarrhea (hours)

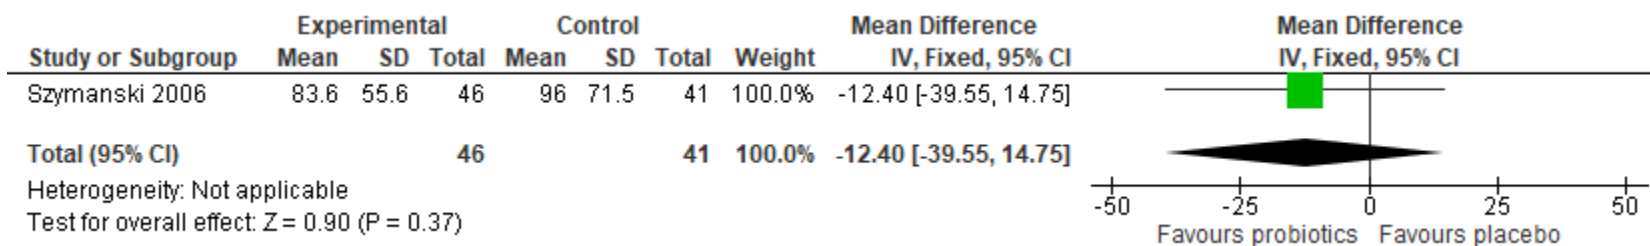

**Question:** *Lactobacillus acidophilus* + “Bifidobacter” compared to placebo for the treatment of acute infectious diarrhea in children (7x)

**Bibliography:** Abbaskhanian 2012

| Certainty assessment |              |              |               |              |             |                      | № of patients                          |         | Effect            |                   | Certainty | Importance |
|----------------------|--------------|--------------|---------------|--------------|-------------|----------------------|----------------------------------------|---------|-------------------|-------------------|-----------|------------|
| № of studies         | Study design | Risk of bias | Inconsistency | Indirectness | Imprecision | Other considerations | <i>L. acidophilus</i> + “Bifidobacter” | placebo | Relative (95% CI) | Absolute (95% CI) |           |            |

**Mean duration of diarrhea**

|   |                   |                      |             |             |                           |      |    |    |   |                                         |                   |          |
|---|-------------------|----------------------|-------------|-------------|---------------------------|------|----|----|---|-----------------------------------------|-------------------|----------|
| 1 | randomised trials | serious <sup>a</sup> | not serious | not serious | very serious <sup>b</sup> | none | 60 | 60 | - | MD 3.48 lower (11 lower to 4.04 higher) | ⊕○○○○<br>VERY LOW | CRITICAL |
|---|-------------------|----------------------|-------------|-------------|---------------------------|------|----|----|---|-----------------------------------------|-------------------|----------|

CI: Confidence interval; MD: Mean difference

**Explanations**

- a. Unclear risk of bias due to selective reporting and detection bias
- b. Few events reported do not meet the optimal information size and suggest fragility in the estimate. The 95% CI includes the potential for both benefit and harm.

Mean Duration of Diarrhea:

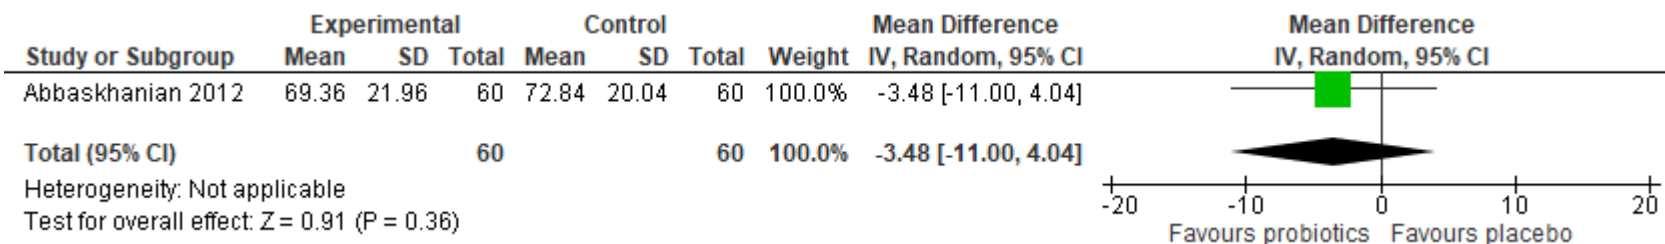



## Appendix 8: Should probiotics be used in preterm, low birth weight infants?

Question: Single- and multiple-strain probiotics compared with no probiotics for preterm, low birth weight infants (8a)

|                                                                                                           | All-cause Mortality<br>OR (95% CI) | NEC (stage ≥ II)<br>OR (95% CI) | Culture proven sepsis<br>OR (95% CI) | Feed intolerance<br>OR (95% CI) | Reduction in days to reach full feed<br>MD (95% CI) | Reduction in days of hospitalization<br>MD (95% CI) |
|-----------------------------------------------------------------------------------------------------------|------------------------------------|---------------------------------|--------------------------------------|---------------------------------|-----------------------------------------------------|-----------------------------------------------------|
| <i>Lactobacillus</i> spp. & <i>Bifidobacterium</i> spp.                                                   | <b>0.56 (0.39,0.80)</b>            | <b>0.35 (0.20,0.59)</b>         | 0.87 (0.60,1.27)                     | -                               | <b>-2.15 (-3.78,-0.51)</b>                          | -2.84 (-6.21,0.54)                                  |
| <i>Bifidobacterium animalis</i> subsp. <i>lactis</i>                                                      | 0.43 (0.16,1.15)                   | <b>0.31 (0.13,0.74)</b>         | 0.73 (0.38,1.43)                     | 0.10 (0.00,2.29)                | -                                                   | <b>-13.00 (-22.71,-3.29)</b>                        |
| <i>Lactobacillus reuteri</i>                                                                              | 0.77 (0.51,1.17)                   | <b>0.55 (0.34,0.91)</b>         | 0.71 (0.41,1.26)                     | 0.26 (0.06,1.10)                | <b>-2.62 (-4.53,-0.71)</b>                          | <b>-7.89 (-11.60,-4.17)</b>                         |
| <i>Lactobacillus rhamnosus</i>                                                                            | 0.84 (0.33,2.12)                   | <b>0.44 (0.21,0.90)</b>         | 0.84 (0.45,1.57)                     | 0.75 (0.11,5.35)                | 0.02 (-3.29,3.32)                                   | -1.85 (-7.62,3.91)                                  |
| <i>Lactobacillus</i> spp. & <i>Bifidobacterium</i> spp. & <i>Enterococcus</i> spp.                        | 0.78 (0.23,2.62)                   | <b>0.28 (0.16,0.49)</b>         | 0.43 (0.17,1.07)                     | 0.23 (0.02,3.07)                | -                                                   | -6.00 (-19.53,7.53)                                 |
| <i>Bifidobacterium</i> spp. & <i>Streptococcus salivarius</i> subsp. <i>thermophilus</i>                  | 0.84 (0.51,1.40)                   | <b>0.38 (0.19,0.75)</b>         | 1.04 (0.52,2.06)                     | -                               | -1.35 (-4.66,1.95)                                  | -2.75 (-10.00,4.50)                                 |
| <i>Bacillus</i> spp. & <i>Enterococcus</i> spp.                                                           | 0.95 (0.02,48.18)                  | <b>0.23 (0.08,0.63)</b>         | -                                    | -                               | -                                                   | -                                                   |
| <i>Lactobacillus</i> spp. & <i>Bifidobacterium</i> spp. & <i>Saccharomyces boulardii</i>                  | 1.05 (0.51,2.17)                   | 0.73 (0.29,1.85)                | 0.54 (0.28,1.04)                     | 0.47 (0.04,5.04)                | <b>-3.30 (-5.91,-0.69)</b>                          | -3.20 (-8.38,1.98)                                  |
| <i>Lactobacillus acidophilus</i>                                                                          | 0.29 (0.03,3.12)                   | 1.00 (0.02,53.66)               | -                                    | -                               | -                                                   | 20.70 (-12.55,53.95)                                |
| <i>B. animalis</i> subsp. <i>lactis</i> & <i>Bifidobacterium longum</i> subsp. <i>longum</i>              | 0.39 (0.04,4.18)                   | 1.42 (0.37,5.42)                | 0.77 (0.23,2.57)                     | -                               | -                                                   | -                                                   |
| <i>B. longum</i> subsp. <i>longum</i>                                                                     | 0.77 (0.11,5.35)                   | 0.25 (0.03,2.30)                | 0.75 (0.23,2.50)                     | -                               | -                                                   | -                                                   |
| <i>Lactobacillus</i> spp. & <i>Bifidobacterium</i> spp. & <i>S. salivarius</i> subsp. <i>thermophilus</i> | 0.40 (0.12,1.30)                   | 0.42 (0.16,1.13)                | 0.68 (0.35,1.30)                     | 0.68 (0.06,7.70)                | 5.75 (-0.33,11.83)                                  | 7.25 (-5.83,20.33)                                  |
| <i>Bifidobacterium adolescentis</i>                                                                       | 0.93 (0.02,47.20)                  | 0.13 (0.01,2.51)                | -                                    | -                               | -                                                   | -                                                   |
| <i>Bacillus coagulans</i>                                                                                 | 0.91 (0.38,2.15)                   | 0.58 (0.20,1.65)                | 1.15 (0.41,3.21)                     | 0.47 (0.04,5.02)                | -1.00 (-5.78,3.78)                                  | 4.50 (-4.33,13.33)                                  |
| <i>Bifidobacterium bifidum</i>                                                                            | 4.31 (0.20,90.52)                  | 0.85 (0.02,43.14)               | 0.49 (0.13,1.85)                     | -                               | -1.10 (-5.31,3.11)                                  | -0.60 (-13.61,12.41)                                |
| <i>Bacillus clausii</i>                                                                                   | 0.83 (0.37,1.87)                   | 0.98 (0.14,7.10)                | 0.70 (0.20,2.45)                     | 0.81 (0.06,11.00)               | -                                                   | -                                                   |
| <i>Bifidobacterium breve</i>                                                                              | 0.92 (0.63,1.34)                   | 0.92 (0.64,1.32)                | 0.87 (0.48,1.55)                     | -                               | -1.53 (-4.30,1.24)                                  | 1.18 (-5.88,8.24)                                   |
| <i>S. boulardii</i>                                                                                       | 1.01 (0.46,2.23)                   | 0.81 (0.42,1.55)                | 0.77 (0.40,1.45)                     | 0.53 (0.08,3.40)                | -1.02 (-3.64,1.61)                                  | -1.86 (-6.65,2.92)                                  |

Footnote: OR = odds ratio; MD = mean difference. Results are the mean difference, or odds ratio, and associated 95% confidence intervals (95% CIs) between the intervention and placebo from the network meta-analysis. Mean difference values < 0 indicates the

treatment is more effective than placebo. An OR > 1 indicates the treatment is superior to placebo; Underlined numbers in bold represent statistically significant results.

Table legends and description of color gradients:

|                                            | <b>Statistically significant difference with placebo and at least one other tx</b> | <b>Statistically significant difference with placebo</b>              | <b>Statistically no difference with placebo</b> |
|--------------------------------------------|------------------------------------------------------------------------------------|-----------------------------------------------------------------------|-------------------------------------------------|
| <b>High or moderate certainty evidence</b> | <b>Among the most effective</b>                                                    | <b>Inferior to the most effective, but superior to placebo</b>        | <b>No more effective than placebo</b>           |
| <b>Low or very low certainty evidence</b>  | <b>May be among the most effective</b>                                             | <b>May be inferior to the most effective, but superior to placebo</b> | <b>May be no more effective than placebo</b>    |
